# Supplementary material
Source: PubMed Central journal article supplement (PMC1965566)
Supplement: pnas_0704189104_7.pdf [file pnas_0704189104_7.pdf]

**Table 1. General features of the *M. smithii* genome compared to other sequenced Methanobacteriales**

|                                                                     | <i>Methanobrevibacter<br/>smithii</i> | <i>Methanosphaera<br/>stadtmanae</i> | <i>Methanothermobacter<br/>thermoautotrophicus</i> |
|---------------------------------------------------------------------|---------------------------------------|--------------------------------------|----------------------------------------------------|
| <b>Genome Size (bp)</b>                                             | 1,853,160                             | 1,767,403                            | 1,751,377                                          |
| <b>G+C content (%)</b>                                              | 31                                    | 28                                   | 50                                                 |
| <b>Coding Regions (%)</b>                                           | 90                                    | 84                                   | 90                                                 |
| <b>Number of ORFs</b>                                               | 1795                                  | 1534                                 | 1869                                               |
| <b>rRNA operons</b>                                                 | 2                                     | 4                                    | 2                                                  |
| <b>tRNA genes</b>                                                   | 34                                    | 40                                   | 39                                                 |
| <b>tRNA genes with intron</b>                                       | 1                                     | 1                                    | 3                                                  |
| <b>Transposases (remnants)</b>                                      | 2 (20)                                | 1 (2)                                | 0                                                  |
| <b>Insertion Sequences</b>                                          | 8                                     | 4                                    | 0                                                  |
| <b>Restriction Modification<br/>System Subunits (Type I/II/III)</b> | 2/6/1                                 | 3/2/1                                | 3/0/0                                              |
| <b>Putative Prophage</b>                                            | Yes                                   | No                                   | No                                                 |
