# Supplementary material
Source: PubMed Central journal article supplement (PMC1965566)
Supplement: pnas_0704189104_9.pdf [file pnas_0704189104_9.pdf]

Table 3. Transcriptional regulators identified in the *M. smitthii* proteome

| ORF     | COG     | ANNOTATION                                                                                |
|---------|---------|-------------------------------------------------------------------------------------------|
| MSM0026 | COG1396 | predicted transcriptional regulator (possible epoxidase activity)                         |
| MSM0094 |         | predicted transcription regulator (TetR family)                                           |
| MSM0155 | COG2061 | predicted allosteric regulator of homoserine dehydrogenase                                |
| MSM0218 | COG1321 | iron dependent transcriptional regulator (Fe2+-binding)                                   |
| MSM0233 | COG0347 | nitrogen regulatory protein P-II, GlnK                                                    |
| MSM0255 |         | putative transcription regulator (winged helix DNA-binding domain)                        |
| MSM0269 | COG2522 | predicted transcriptional regulator (lambda repressor-like)                               |
| MSM0329 | COG1396 | DNA binding protein, xenobiotic response element family                                   |
| MSM0354 | COG1222 | ATP-dependent 26S proteasome regulatory subunit, RPT1                                     |
| MSM0364 | COG0864 | transcriptional regulator (nickel-responsive), NikR                                       |
| MSM0383 | COG1409 | predicted phosphohydrolase, calcineurin-like superfamily                                  |
| MSM0388 | COG4747 | amino acid regulator (ACT domain)                                                         |
| MSM0404 | COG4742 | predicted transcriptional regulator                                                       |
| MSM0413 | COG1846 | transcriptional regulator, MarR family                                                    |
| MSM0417 | COG4068 | predicted transmembrane protein with a zinc ribbon DNA-binding domain                     |
| MSM0452 |         | predicted DNA-binding protein                                                             |
| MSM0453 | COG1395 | predicted transcriptional regulator                                                       |
| MSM0540 | COG2865 | predicted transcriptional regulator                                                       |
| MSM0564 | COG0704 | phosphate uptake regulator, PhoU                                                          |
| MSM0569 | COG0704 | phosphate transport system regulator related protein, PhoU                                |
| MSM0600 | COG1846 | transcriptional regulator, MarR family                                                    |
| MSM0635 | COG2150 | predicted regulator of amino acid metabolism                                              |
| MSM0650 | COG1309 | transcriptional regulator, TetR/AcrR family                                               |
| MSM0766 | COG0340 | biotin-[acetyl-CoA-carboxylase] ligase/biotin operon regulator bifunctional protein, BirA |
| MSM0775 | COG2207 | transcriptional regulator, AraC family                                                    |
| MSM0817 | COG4742 | predicted transcriptional regulator                                                       |
| MSM0818 | COG4742 | predicted transcriptional regulator                                                       |
| MSM0819 | COG0640 | putative transcription regulator, ArsR family (winged helix DNA-binding domain)           |
| MSM0851 | COG1548 | predicted transcriptional regulator                                                       |
| MSM0862 | COG1781 | aspartate carbamoyltransferase regulatory chain, PyrI                                     |
| MSM0864 | COG1733 | predicted transcriptional regulator                                                       |
| MSM0936 | COG0603 | transcription regulator-related ATPase, ExsB                                              |
| MSM0966 | COG1223 | predicted 26S protease regulatory subunit (ATP-dependent), AAA+ family ATPase             |
| MSM1030 | COG0399 | predicted pyridoxal phosphate-dependent enzyme                                            |
| MSM1032 | COG1522 | transcriptional regulator, Lrp family                                                     |
| MSM1081 | COG1112 | transcriptional regulator, DNA2/NAM7 helicase family                                      |
| MSM1090 | COG1489 | sugar fermentation stimulation protein, SfsA                                              |
| MSM1106 | COG0068 | hydrogenase maturation factor, HypF                                                       |
| MSM1107 | COG1777 | predicted transcriptional regulator                                                       |
| MSM1126 | COG0640 | predicted transcriptional regulator, ArsR family (arsenic)                                |
| MSM1150 | COG1476 | predicted transcriptional regulator                                                       |
| MSM1207 | COG2005 | molybdate transport system regulatory protein                                             |
| MSM1224 | COG0440 | acetolactate synthase, small subunit (regulatory), IivH                                   |
| MSM1230 | COG1846 | transcriptional regulator, MarR family                                                    |
| MSM1250 | COG1695 | predicted transcriptional regulator, PadR-like family                                     |
| MSM1257 | COG1339 | predicted transcriptional regulator of riboflavin/FAD biosynthetic operon                 |
| MSM1292 | COG2183 | transcriptional accessory protein, S1 RNA binding family, Tex                             |
| MSM1315 | COG2865 | predicted transcriptional regulator                                                       |
| MSM1350 | COG0640 | predicted transcriptional regulator, ArsR family                                          |
| MSM1390 | COG0583 | transcriptional regulator, LysR family                                                    |
| MSM1445 | COG1378 | predicted transcriptional regulator                                                       |
| MSM1499 | COG1497 | predicted transcriptional regulator                                                       |
| MSM1528 | COG1396 | predicted transcriptional regulator, HTH XRE-like family (xenobiotic)                     |
| MSM1536 | COG0399 | pleiotropic regulatory protein DegT (PLP-dependent)                                       |
| MSM1568 |         | putative transcription regulator                                                          |
| MSM1606 | COG0641 | arylsulfatase regulator, AsIB                                                             |
| MSM1614 | COG2524 | predicted transcriptional regulator                                                       |
| MSM1713 | COG4747 | predicted regulatory protein, amino acid-binding ACT domain family                        |
| MSM1737 |         | putative transcription regulator                                                          |
| MSM1777 |         | putative transcription regulator                                                          |
