# Supplementary material
Source: PubMed Central journal article supplement (PMC1965566)
Supplement: pnas_0704189104_10.pdf [file pnas_0704189104_10.pdf]

Table 4. Machinery for genome evolution in *M. smithii*

|                                                 | ORF                                               | ANNOTATION                                                            |
|-------------------------------------------------|---------------------------------------------------|-----------------------------------------------------------------------|
| <b>Restriction-Modification System Subunits</b> | MSM0157                                           | predicted type I restriction-modification enzyme, subunit S           |
|                                                 | MSM0158                                           | type I restriction-modification system methylase, subunit S           |
|                                                 | MSM1187                                           | predicted type III restriction enzyme                                 |
|                                                 | MSM1217                                           | type II restriction endonuclease                                      |
|                                                 | MSM1743                                           | predicted type II restriction enzyme, methylase subunit               |
|                                                 | MSM1744                                           | predicted type II restriction enzyme, methylase subunit               |
|                                                 | MSM1745                                           | predicted type II restriction enzyme, methylase subunit               |
|                                                 | MSM1746                                           | predicted type II restriction enzyme, methylase subunit               |
|                                                 | MSM1747                                           | predicted type II restriction enzyme, methylase subunit               |
|                                                 | MSM1748                                           | predicted type II restriction enzyme, methylase subunit               |
|                                                 | MSM1752                                           | predicted restriction endonuclease                                    |
| <b>Recombination/Repair</b>                     | MSM0023                                           | uncharacterized protein predicted to be involved in DNA repair        |
|                                                 | MSM0097                                           | Mg-dependent DNase, TatD                                              |
|                                                 | MSM0120                                           | purine NTPase involved in DNA repair, Rad50                           |
|                                                 | MSM0121                                           | DNA repair exonuclease (SbcD/Mre11-family), Rad32                     |
|                                                 | MSM0163                                           | conserved hypothetical protein predicted to be involved in DNA repair |
|                                                 | MSM0164                                           | conserved hypothetical protein predicted to be involved in DNA repair |
|                                                 | MSM0167                                           | conserved hypothetical protein predicted to be involved in DNA repair |
|                                                 | MSM0168                                           | conserved hypothetical protein predicted to be involved in DNA repair |
|                                                 | MSM0170                                           | conserved hypothetical protein predicted to be involved in DNA repair |
|                                                 | MSM0405                                           | predicted metal-dependent DNase, TatD-related family                  |
|                                                 | MSM0416                                           | Mg-dependent DNase, TatD-related                                      |
|                                                 | MSM0524                                           | DNA mismatch repair ATPase, MutS                                      |
|                                                 | MSM0543                                           | DNA repair photolyase, SplB                                           |
|                                                 | MSM0611                                           | DNA repair protein, RadB                                              |
|                                                 | MSM0693                                           | ATPase involved in DNA repair, SbcC                                   |
|                                                 | MSM0695                                           | DNA repair helicase                                                   |
|                                                 | MSM0725                                           | DNA repair flap structure-specific 5'-3' endonuclease                 |
|                                                 | MSM1193                                           | single-stranded DNA-specific exonuclease, DHH family                  |
|                                                 | MSM1333                                           | DNA repair protein RadA, RadA                                         |
|                                                 | MSM1500                                           | ssDNA exonuclease, RecJ                                               |
| MSM1640                                         | DNA integrase/recombinase, phage integrase family |                                                                       |
| MSM1761                                         | predicted ATPase involved in DNA repair           |                                                                       |
| <b>IS elements</b>                              | MSM0527                                           | IS element ISM1 (ICSNY family)                                        |
|                                                 | MSM0528                                           | IS element ISM1 (ICSNY family)                                        |
|                                                 | MSM0532                                           | IS element ISM1 (ICSNY family)                                        |
|                                                 | MSM0533                                           | IS element ISM1 (ICSNY family)                                        |
|                                                 | MSM0534                                           | IS element ISM1 (ICSNY family)                                        |
|                                                 | MSM1518                                           | IS element ISM1 (ICSNY family)                                        |
|                                                 | MSM1519                                           | IS element ISM1 (ICSNY family)                                        |
|                                                 | MSM1520                                           | IS element ISM1 (ICSNY family)                                        |
| <b>Transposases or remnants of transposases</b> | MSM0008                                           | putative transposase                                                  |
|                                                 | MSM0087                                           | putative transposase                                                  |
|                                                 | MSM0110                                           | predicted transposase                                                 |
|                                                 | MSM0230                                           | putative transposase                                                  |
|                                                 | MSM0256                                           | putative transposase                                                  |
|                                                 | MSM0342                                           | putative transposase                                                  |
|                                                 | MSM0396                                           | putative transposase                                                  |
|                                                 | MSM0458                                           | transposase, homeodomain-like superfamily                             |
|                                                 | MSM0460                                           | predicted transposase                                                 |
|                                                 | MSM0601                                           | putative transposase                                                  |
|                                                 | MSM0629                                           | putative transposase                                                  |
|                                                 | MSM0730                                           | putative transposase                                                  |
|                                                 | MSM0871                                           | putative transposase                                                  |
|                                                 | MSM1093                                           | putative transposase                                                  |
|                                                 | MSM1115                                           | putative transposase                                                  |
|                                                 | MSM1189                                           | putative transposase                                                  |
|                                                 | MSM1419                                           | putative transposase                                                  |
|                                                 | MSM1523                                           | transposase                                                           |
|                                                 | MSM1566                                           | putative transposase                                                  |
|                                                 | MSM1588                                           | predicted transposase                                                 |
| MSM1589                                         | predicted transposase, RNaseH-like family         |                                                                       |
| MSM1596                                         | putative transposase                              |                                                                       |
