# Supplementary material
Source: PubMed Central journal article supplement (PMC1965566)
Supplement: pnas_0704189104_11.pdf [file pnas_0704189104_11.pdf]

**Table 5. Publicly available finished genome sequences for members of Archaea**

| <b>Group</b>                          | <b>Strain Designation</b>                             | <b>Abbreviation</b> | <b>Temperature</b> | <b>Habitat of Origin</b> | <b>GenBank Accession Number</b> |
|---------------------------------------|-------------------------------------------------------|---------------------|--------------------|--------------------------|---------------------------------|
| <b>Human Gut Methanogens</b>          | <i>Methanobrevibacter smithii</i> PS (ATCC 35021)     | Msm                 | Mesophilic         | Host-associated          | CP000678                        |
|                                       | <i>Methanosphaera stadtmanae</i> DSM 3091             | Msp                 | Mesophilic         | Host-associated          | CP000102                        |
| <b>Non-Gut Methanogens</b>            | <i>Methanothermobacter thermautotrophicus</i> Delta H | Mth                 | Thermophilic       | Specialized              | AE000666                        |
|                                       | <i>Methanocaldococcus jannaschii</i> DSM 2661         | Mja                 | Hyperthermophilic  | Aquatic                  | L77117                          |
|                                       | <i>Methanococcoides burtonii</i> DSM 6242             | Mbu                 | Mesophilic         | Aquatic                  | CP000300                        |
|                                       | <i>Methanococcus maripaludis</i> S2                   | Mmr                 | Mesophilic         | Aquatic                  | BX950229                        |
|                                       | <i>Methanopyrus kandleri</i> AV19                     | Mka                 | Hyperthermophilic  | Specialized              | AE009439                        |
|                                       | <i>Methanosarcina acetivorans</i> C2A                 | Mac                 | Mesophilic         | Aquatic                  | AE010299                        |
|                                       | <i>Methanosarcina barkeri</i> str. Fusaro             | Mba                 | Mesophilic         | Multiple                 | CP000099                        |
|                                       | <i>Methanosarcina mazei</i> Go1                       | Mma                 | Mesophilic         | Multiple                 | AE008384                        |
| <i>Methanospirillum hungatei</i> JF-1 | Mhu                                                   | Mesophilic          | Multiple           | CP000254                 |                                 |
| <b>Other Archaea</b>                  | <i>Aeropyrum pernix</i> K1                            | Apx                 | Hyperthermophilic  | Specialized              | BA000002                        |
|                                       | <i>Archaeoglobus fulgidus</i> DSM 4304                | Afu                 | Hyperthermophilic  | Aquatic                  | AE000782                        |
|                                       | <i>Haloarcula marismortui</i> ATCC 43049              | Hma                 | Mesophilic         | Aquatic                  | AY596297                        |
|                                       | <i>Halobacterium</i> sp. NRC-1                        | Hal                 | Mesophilic         | Specialized              | AE004437                        |
|                                       | <i>Nanoarchaeum equitans</i> Kin4-M                   | Neq                 | Hyperthermophilic  | Host-associated          | AE017199                        |
|                                       | <i>Natronomonas pharaonis</i> DSM 2160                | Nph                 | Mesophilic         | Aquatic                  | CR936257                        |
|                                       | <i>Picrophilus torridus</i> DSM 9790                  | Pto                 | Thermophilic       | Specialized              | AE017261                        |
|                                       | <i>Pyrobaculum aerophilum</i> str. IM2                | Pae                 | Hyperthermophilic  | Aquatic                  | AE009441                        |
|                                       | <i>Pyrococcus abyssi</i> GE5                          | Pab                 | Hyperthermophilic  | Aquatic                  | AL096836                        |
|                                       | <i>Pyrococcus furiosus</i> DSM 3638                   | Pfu                 | Hyperthermophilic  | Aquatic                  | AE009950                        |
|                                       | <i>Pyrococcus horikoshii</i> OT3                      | Pho                 | Hyperthermophilic  | Aquatic                  | BA000001                        |
|                                       | <i>Sulfolobus acidocaldarius</i> DSM 639              | Sac                 | Thermophilic       | Specialized              | CP000077                        |
|                                       | <i>Sulfolobus solfataricus</i> P2                     | Sso                 | Hyperthermophilic  | Specialized              | AE006641                        |
|                                       | <i>Sulfolobus tokodaii</i> str. 7                     | Sto                 | Hyperthermophilic  | Specialized              | BA000023                        |
|                                       | <i>Thermococcus kodakarensis</i> KOD1                 | Tko                 | Hyperthermophilic  | Specialized              | AP006878                        |
|                                       | <i>Thermoplasma acidophilum</i> DSM 1728              | Tac                 | Thermophilic       | Specialized              | AL139299                        |
|                                       | <i>Thermoplasma volcanium</i> GSS1                    | Tvo                 | Thermophilic       | Specialized              | BA000011                        |
