# Supplementary material
Source: PubMed Central journal article supplement (PMC1965566)
Supplement: pnas_0704189104_12.pdf [file pnas_0704189104_12.pdf]

**Table 6. Representation of enriched gene ontology (GO) categories in the *M. smithii* and *M. stadtmanae* proteomes compared to the proteomes of all sequenced methanogenic archaea and all archaea**

| Category                           | GO         | Description                                                | <i>M. smithii</i> |      |      | <i>M. stadtmanae</i> |      |      |
|------------------------------------|------------|------------------------------------------------------------|-------------------|------|------|----------------------|------|------|
|                                    |            |                                                            | No.               | Arch | Meth | No.                  | Arch | Meth |
| <b>SURFACE VARIATION</b>           | GO:0007047 | cell wall organization and biogenesis                      | 17                |      |      | 10                   |      |      |
|                                    | GO:0042545 | cell wall modification                                     | 9                 |      |      | 6                    |      |      |
|                                    | GO:0030599 | pectinesterase activity                                    | 9                 |      |      | 6                    |      |      |
|                                    | GO:0042546 | cell wall biosynthesis                                     | 8                 |      |      | 4                    |      |      |
|                                    | GO:0009252 | peptidoglycan biosynthesis                                 | 5                 |      |      | 4                    |      |      |
| <b>CENTRAL METABOLISM</b>          | GO:0006082 | organic acid metabolism                                    | 109               |      |      | 105                  |      |      |
|                                    | GO:0006730 | one-carbon compound metabolism                             | 27                |      |      | 22                   |      |      |
|                                    | GO:0045333 | cellular respiration                                       | 20                |      |      | 14                   |      |      |
|                                    | GO:0015948 | methanogenesis                                             | 19                |      |      | 13                   |      |      |
| <b>COFACTOR/VITAMIN METABOLISM</b> | GO:0019321 | pentose metabolism                                         | 5                 |      |      | 1                    |      |      |
|                                    | GO:0046872 | metal ion binding                                          | 120               |      |      | 97                   |      |      |
|                                    | GO:0005506 | iron ion binding                                           | 77                |      |      | 61                   |      |      |
|                                    | GO:0050661 | NADP binding                                               | 11                |      |      | 4                    |      |      |
|                                    | GO:0006767 | water-soluble vitamin metabolism                           | 49                |      |      | 44                   |      |      |
| <b>AMINO ACID METABOLISM</b>       | GO:0042727 | riboflavin and derivative biosynthesis                     | 11                |      |      | 4                    |      |      |
|                                    | GO:0008703 | 5-amino-6-(5-phosphoribosylamino)uracil reductase activity | 8                 |      |      | 1                    |      |      |
|                                    | GO:0006519 | amino acid and derivative metabolism                       | 98                |      |      | 99                   |      |      |
| <b>ENVIRONMENTAL SENSING</b>       | GO:0008652 | amino acid biosynthesis                                    | 60                |      |      | 58                   |      |      |
|                                    | GO:0004672 | protein kinase activity                                    | 4                 |      |      | 4                    |      |      |
| <b>TRANSCRIPTIONAL CONTROL</b>     | GO:0007165 | signal transduction                                        | 3                 |      |      | 0                    |      |      |
|                                    | GO:0000160 | two-component signal transduction system (phosphorelay)    | 1                 |      |      | 0                    |      |      |
|                                    | GO:0006350 | transcription                                              | 45                |      |      | 35                   |      |      |
| <b>NUTRIENT TRANSPORT</b>          | GO:0019222 | regulation of metabolism                                   | 36                |      |      | 29                   |      |      |
|                                    | GO:0045449 | regulation of transcription                                | 32                |      |      | 24                   |      |      |
|                                    | GO:0046943 | carboxylic acid transporter activity                       | 1                 |      |      | 3                    |      |      |
| <b>PHOSPHATE METABOLISM</b>        | GO:0015849 | organic acid transport                                     | 0                 |      |      | 2                    |      |      |
|                                    | GO:0005275 | amine transporter activity                                 | 0                 |      |      | 0                    |      |      |
| <b>RECOMBINATION</b>               | GO:0006796 | phosphate metabolism                                       | 24                |      |      | 23                   |      |      |
|                                    | GO:0006310 | DNA recombination                                          | 8                 |      |      | 7                    |      |      |

| P-value    | >1E-2 | <1E-2 | <1E-3 | <1E-4 |
|------------|-------|-------|-------|-------|
| Enrichment |       |       |       |       |
| Depletion  |       |       |       |       |

Abbreviations: 'non-gut-associated methanogens' (Meth) or 'all Archaea' (Arch) [see SI Table 5]; No., number of genes associated with gene ontology (GO) term.
