# Supplementary material
Source: PubMed Central journal article supplement (PMC1965566)
Supplement: pnas_0704189104_13.pdf [file pnas_0704189104_13.pdf]

Table 7. *M. smithii* genes in the significantly enriched GO categories listed in Table 6

- member of GO category  
 - not a member of GO category

| ENRICHED COMPARED TO SEQUENCED ARCHAEA AND/OR NON-GUT METHANOGENS |                         |                                                                                               |                                                    |                                             |                                      |                                     |                                         |
|-------------------------------------------------------------------|-------------------------|-----------------------------------------------------------------------------------------------|----------------------------------------------------|---------------------------------------------|--------------------------------------|-------------------------------------|-----------------------------------------|
| SURFACE VARIATION                                                 | <i>M. smithii</i> genes | Annotation                                                                                    | GO:0007047 - cell wall organization and biogenesis | GO:0042545 - cell wall modification         | GO:0030599 - pectinesterase activity | GO:0042546 - cell wall biosynthesis | GO:0009252 - peptidoglycan biosynthesis |
|                                                                   |                         |                                                                                               |                                                    |                                             |                                      |                                     |                                         |
|                                                                   | MSM0052                 | adhesin-like protein                                                                          |                                                    |                                             |                                      |                                     |                                         |
|                                                                   | MSM0118                 | cell wall biosynthesis protein, MurD-like peptide ligase family                               |                                                    |                                             |                                      |                                     |                                         |
|                                                                   | MSM0266                 | adhesin-like protein                                                                          |                                                    |                                             |                                      |                                     |                                         |
|                                                                   | MSM0359                 | cell wall biosynthesis protein, MurD-like peptide ligase family                               |                                                    |                                             |                                      |                                     |                                         |
|                                                                   | MSM0360                 | cell wall biosynthesis protein, phospho-N-acetylmuramoyl-pentapeptide-transferase family      |                                                    |                                             |                                      |                                     |                                         |
|                                                                   | MSM1111                 | adhesin-like protein                                                                          |                                                    |                                             |                                      |                                     |                                         |
|                                                                   | MSM1112                 | adhesin-like protein                                                                          |                                                    |                                             |                                      |                                     |                                         |
|                                                                   | MSM1113                 | adhesin-like protein                                                                          |                                                    |                                             |                                      |                                     |                                         |
|                                                                   | MSM1190                 | cell wall biosynthesis protein, UDP-N-acetylmuramate-alanine ligase family                    |                                                    |                                             |                                      |                                     |                                         |
|                                                                   | MSM1191                 | cell wall biosynthesis protein, MurD-like peptide ligase family                               |                                                    |                                             |                                      |                                     |                                         |
|                                                                   | MSM1327                 | predicted CDP-glycerol:poly(glycerophosphate) glycerophosphotransferase                       |                                                    |                                             |                                      |                                     |                                         |
|                                                                   | MSM1585                 | adhesin-like protein                                                                          |                                                    |                                             |                                      |                                     |                                         |
|                                                                   | MSM1586                 | adhesin-like protein                                                                          |                                                    |                                             |                                      |                                     |                                         |
|                                                                   | MSM1587                 | adhesin-like protein                                                                          |                                                    |                                             |                                      |                                     |                                         |
|                                                                   | MSM1590                 | adhesin-like protein                                                                          |                                                    |                                             |                                      |                                     |                                         |
|                                                                   | MSM1594                 | glycosyltransferase/CDP-glycerol:poly(glycerophosphate) glycerophosphotransferase, GT2 family |                                                    |                                             |                                      |                                     |                                         |
|                                                                   | MSM1602                 | glycosyltransferase/CDP-glycerol:poly(glycerophosphate) glycerophosphotransferase, GT2 family |                                                    |                                             |                                      |                                     |                                         |
| CENTRAL METABOLISM                                                | <i>M. smithii</i> genes | Annotation                                                                                    | GO:0006082 - organic acid metabolism               | GO:0006730 - one-carbon compound metabolism | GO:0045333 - cellular respiration    | GO:0015948 - methanogenesis         | GO:0019321 - pentose metabolism         |
|                                                                   |                         |                                                                                               |                                                    |                                             |                                      |                                     |                                         |
|                                                                   | MSM0027                 | glutamate synthase, domain 2 with rubredoxin                                                  |                                                    |                                             |                                      |                                     |                                         |
|                                                                   | MSM0071                 | methionyl-tRNA synthetase, MetG                                                               |                                                    |                                             |                                      |                                     |                                         |
|                                                                   | MSM0082                 | heterodisulfide reductase, subunit A, HdrA                                                    |                                                    |                                             |                                      |                                     |                                         |
|                                                                   | MSM0089                 | pyrroline-5-carboxylate reductase (NADP oxidoreductase, coenzyme F420 dependent), ProC        |                                                    |                                             |                                      |                                     |                                         |
|                                                                   | MSM0102                 | cobalamin-independent methionine synthase, MetE                                               |                                                    |                                             |                                      |                                     |                                         |
|                                                                   | MSM0154                 | homoserine dehydrogenase, ThrA                                                                |                                                    |                                             |                                      |                                     |                                         |

|                |                                                                                                   |  |  |  |  |  |
|----------------|---------------------------------------------------------------------------------------------------|--|--|--|--|--|
| <b>MSM0160</b> | asparagine synthetase, AsnB                                                                       |  |  |  |  |  |
| <b>MSM0174</b> | O-acetylhomoserine sulfhydrylase (PLP-dependent), MET17                                           |  |  |  |  |  |
| <b>MSM0175</b> | homoserine O-acetyltransferase, MetX                                                              |  |  |  |  |  |
| <b>MSM0214</b> | threonine synthase (pyridoxal-phosphate dependent), ThrC                                          |  |  |  |  |  |
| <b>MSM0216</b> | tryptophanyl-tRNA synthetase, TrpS                                                                |  |  |  |  |  |
| <b>MSM0231</b> | 3-dehydroquinate dehydratase                                                                      |  |  |  |  |  |
| <b>MSM0265</b> | O-acetylhomoserine sulfhydrylase                                                                  |  |  |  |  |  |
| <b>MSM0268</b> | cysteinyl-tRNA synthetase, CysS                                                                   |  |  |  |  |  |
| <b>MSM0270</b> | serine acetyltransferase, CysE                                                                    |  |  |  |  |  |
| <b>MSM0271</b> | cysteine synthase, CysK                                                                           |  |  |  |  |  |
| <b>MSM0273</b> | EPSP synthase (3-phosphoshikimate 1-carboxyvinyltransferase)                                      |  |  |  |  |  |
| <b>MSM0275</b> | valyl-tRNA synthetase, ValS                                                                       |  |  |  |  |  |
| <b>MSM0277</b> | phenylalanyl-tRNA synthetase, beta subunit, PheT                                                  |  |  |  |  |  |
| <b>MSM0286</b> | glycerol 1-phosphate dehydrogenase (Dehydroquinate synthase-like family)                          |  |  |  |  |  |
| <b>MSM0287</b> | prolyl-tRNA synthetase, ProS                                                                      |  |  |  |  |  |
| <b>MSM0307</b> | sugar kinase (ribokinase/pfkB superfamily)                                                        |  |  |  |  |  |
| <b>MSM0308</b> | formylmethanofuran:tetrahydromethanopterin formyltransferase, FtrC                                |  |  |  |  |  |
| <b>MSM0334</b> | L-asparaginase, GatD,                                                                             |  |  |  |  |  |
| <b>MSM0343</b> | GMP synthase (glutamine-hydrolysing), subunit A, GuaA                                             |  |  |  |  |  |
| <b>MSM0350</b> | 2-isopropylmalate synthase, LeuA                                                                  |  |  |  |  |  |
| <b>MSM0368</b> | glutamate synthase (NADPH), subunit 2                                                             |  |  |  |  |  |
| <b>MSM0371</b> | predicted glutamine amidotransferase involved in pyridoxine biosynthesis, Pdx2                    |  |  |  |  |  |
| <b>MSM0373</b> | isocitrate/isopropylmalate dehydrogenase, LeuB                                                    |  |  |  |  |  |
| <b>MSM0375</b> | acetylglutamate kinase, ArgB                                                                      |  |  |  |  |  |
| <b>MSM0379</b> | glutamate N-acetyltransferase, ArgJ                                                               |  |  |  |  |  |
| <b>MSM0388</b> | amino acid regulator                                                                              |  |  |  |  |  |
| <b>MSM0393</b> | fumarate reductase, iron-sulfur protein                                                           |  |  |  |  |  |
| <b>MSM0403</b> | glycyl-tRNA synthetase                                                                            |  |  |  |  |  |
| <b>MSM0415</b> | uridylate kinase, PyrH                                                                            |  |  |  |  |  |
| <b>MSM0457</b> | D-3-phosphoglycerate dehydrogenase, SerA                                                          |  |  |  |  |  |
| <b>MSM0488</b> | carbamoylphosphate synthase, large subunit, CarB                                                  |  |  |  |  |  |
| <b>MSM0489</b> | carbamoylphosphate synthase, small subunit, CarA                                                  |  |  |  |  |  |
| <b>MSM0513</b> | tyrosyl-tRNA synthetase, TyrS                                                                     |  |  |  |  |  |
| <b>MSM0516</b> | corrinoid protein (methionine synthase-related), MtaC                                             |  |  |  |  |  |
| <b>MSM0518</b> | methylcobalamin:coenzyme M methyltransferase, MtaA                                                |  |  |  |  |  |
| <b>MSM0556</b> | dihydropteroate synthase                                                                          |  |  |  |  |  |
| <b>MSM0572</b> | H(2)-forming N5,N10-methylenetetrahydromethanopterin dehydrogenase (coenzyme F420-dependent), Mth |  |  |  |  |  |
| <b>MSM0573</b> | biotin synthetase, BioB                                                                           |  |  |  |  |  |
| <b>MSM0604</b> | predicted archaeal aspartate/glutamate/uridylate kinase                                           |  |  |  |  |  |
| <b>MSM0619</b> | alanyl-tRNA synthetase, AlaS                                                                      |  |  |  |  |  |
| <b>MSM0627</b> | tetrahydromethanopterin S-methyltransferase, subunit H, MtrH                                      |  |  |  |  |  |
| <b>MSM0641</b> | prephenate dehydrogenase (NADP+)                                                                  |  |  |  |  |  |

|                |                                                                                        |  |  |  |  |  |
|----------------|----------------------------------------------------------------------------------------|--|--|--|--|--|
| <b>MSM0653</b> | histidinol-phosphate aminotransferase, HisC                                            |  |  |  |  |  |
| <b>MSM0719</b> | phosphoserine phosphatase, HAD family, SerB                                            |  |  |  |  |  |
| <b>MSM0722</b> | 2-isopropylmalate synthase, LeuA                                                       |  |  |  |  |  |
| <b>MSM0723</b> | 3-isopropylmalate dehydratase, LeuC                                                    |  |  |  |  |  |
| <b>MSM0727</b> | S-adenosylhomocysteine hydrolase (adenosylhomocysteinase), AhcY                        |  |  |  |  |  |
| <b>MSM0829</b> | aspartate-semialdehyde dehydrogenase, Asd                                              |  |  |  |  |  |
| <b>MSM0830</b> | dihydrodipicolinate reductas, DapB                                                     |  |  |  |  |  |
| <b>MSM0832</b> | aspartokinase, alpha subunit                                                           |  |  |  |  |  |
| <b>MSM0834</b> | chorismate mutase                                                                      |  |  |  |  |  |
| <b>MSM0835</b> | archaeal shikimate kinase                                                              |  |  |  |  |  |
| <b>MSM0847</b> | archaeal 3-isopropylmalate dehydratase, small subunit, LeuD                            |  |  |  |  |  |
| <b>MSM0858</b> | phosphoribosylformimino-5-aminoimidazole carboxamide ribotide (ProFAR) isomerase, HisA |  |  |  |  |  |
| <b>MSM0860</b> | aspartate-semialdehyde dehydrogenase, ArgC                                             |  |  |  |  |  |
| <b>MSM0878</b> | pyruvoyl-dependent arginine decarboxylase, PdaD                                        |  |  |  |  |  |
| <b>MSM0888</b> | glutamate dehydrogenase (NADP+), GdhA                                                  |  |  |  |  |  |
| <b>MSM0902</b> | methyl-coenzyme M reductase, alpha subunit, McrA                                       |  |  |  |  |  |
| <b>MSM0903</b> | methyl-coenzyme M reductase, gamma subunit, McrG                                       |  |  |  |  |  |
| <b>MSM0904</b> | methyl-coenzyme M reductase, D subunit, McrD                                           |  |  |  |  |  |
| <b>MSM0905</b> | methyl-coenzyme M reductase, beta subunit, McrB                                        |  |  |  |  |  |
| <b>MSM0939</b> | pyruvate carboxylase, subunit B, PycB                                                  |  |  |  |  |  |
| <b>MSM0965</b> | 3-hydroxyacyl-CoA dehydrogenase, FadB                                                  |  |  |  |  |  |
| <b>MSM0967</b> | glutamyl-tRNA reductase, HemA                                                          |  |  |  |  |  |
| <b>MSM0987</b> | tyrosine decarboxylase, MfnA                                                           |  |  |  |  |  |
| <b>MSM0988</b> | phosphoenolpyruvate synthase, PpsA                                                     |  |  |  |  |  |
| <b>MSM1001</b> | methyl viologen-reducing hydrogenase, delta subunit, MvhD                              |  |  |  |  |  |
| <b>MSM1007</b> | N5-methyl-tetrahydromethanopterin:coenzyme M methyltransferase, subunit H, MtrH        |  |  |  |  |  |
| <b>MSM1008</b> | N5-methyl-tetrahydromethanopterin:coenzyme M methyltransferase, subunit G, MtrG        |  |  |  |  |  |
| <b>MSM1011</b> | N5-methyl-tetrahydromethanopterin:coenzyme M methyltransferase, subunit B, MtrB        |  |  |  |  |  |
| <b>MSM1012</b> | N5-methyl-tetrahydromethanopterin:coenzyme M methyltransferase, subunit C, MtrC        |  |  |  |  |  |
| <b>MSM1015</b> | methyl-coenzyme M reductase, alpha subunit, McrA                                       |  |  |  |  |  |
| <b>MSM1016</b> | methyl-coenzyme M reductase, gamma subunit, McrG                                       |  |  |  |  |  |
| <b>MSM1017</b> | methyl-coenzyme M reductase, C subunit, McrC                                           |  |  |  |  |  |
| <b>MSM1018</b> | methyl-coenzyme M reductase, D subunit, McrD                                           |  |  |  |  |  |
| <b>MSM1019</b> | methyl-coenzyme M reductase, beta subunit, McrB                                        |  |  |  |  |  |
| <b>MSM1052</b> | prephenate dehydratase, PheA                                                           |  |  |  |  |  |
| <b>MSM1084</b> | argininosuccinate synthase, ArgG                                                       |  |  |  |  |  |

|                |                                                                             |  |  |  |  |  |
|----------------|-----------------------------------------------------------------------------|--|--|--|--|--|
| <b>MSM1092</b> | formylmethanofuran:tetrahydromethanopterin formyltransferase, Ftr           |  |  |  |  |  |
| <b>MSM1103</b> | phosphoribosyl-ATP pyrophosphohydrolase, HisE                               |  |  |  |  |  |
| <b>MSM1141</b> | tryptophan synthase, alpha subunit, TrpA                                    |  |  |  |  |  |
| <b>MSM1142</b> | tryptophan synthase, beta subunit, TrpB                                     |  |  |  |  |  |
| <b>MSM1143</b> | indole-3-glycerol phosphate synthase, TrpC                                  |  |  |  |  |  |
| <b>MSM1144</b> | anthranilate phosphoribosyltransferase, TrpD                                |  |  |  |  |  |
| <b>MSM1145</b> | anthranilate/para-aminobenzoate synthase component II, TrpG                 |  |  |  |  |  |
| <b>MSM1159</b> | glutamine amidotransferase, HisH                                            |  |  |  |  |  |
| <b>MSM1172</b> | leucyl-tRNA synthetase, LeuS                                                |  |  |  |  |  |
| <b>MSM1179</b> | shikimate 5-dehydrogenase, AroE                                             |  |  |  |  |  |
| <b>MSM1181</b> | histidyl-tRNA synthetase, HisS                                              |  |  |  |  |  |
| <b>MSM1182</b> | phosphoribosyl-AMP cyclohydrolase, HisI                                     |  |  |  |  |  |
| <b>MSM1202</b> | branched-chain-amino-acid aminotransferase, IlvE                            |  |  |  |  |  |
| <b>MSM1204</b> | coenzyme F420-dependent methylenetetrahydromethanopterin dehydrogenase, Mtd |  |  |  |  |  |
| <b>MSM1206</b> | imidazoleglycerol-phosphate dehydrogenase, HisB                             |  |  |  |  |  |
| <b>MSM1214</b> | threonyl-tRNA synthetase, ThrS                                              |  |  |  |  |  |
| <b>MSM1222</b> | ketol-acid reductoisomerase, IlvC                                           |  |  |  |  |  |
| <b>MSM1224</b> | acetolactate synthase, small subunit (regulatory), IlvH                     |  |  |  |  |  |
| <b>MSM1226</b> | ornithine carbamoyltransferase, ArgF                                        |  |  |  |  |  |
| <b>MSM1231</b> | arginyl-tRNA synthetase, ArgS                                               |  |  |  |  |  |
| <b>MSM1236</b> | aspartyl-tRNA synthetase, AspS                                              |  |  |  |  |  |
| <b>MSM1237</b> | dihydroxy-acid dehydratase, IlvD                                            |  |  |  |  |  |
| <b>MSM1238</b> | histidinol dehydrogenase, HisD                                              |  |  |  |  |  |
| <b>MSM1242</b> | tryptophan synthase, beta subunit, TrpB                                     |  |  |  |  |  |
| <b>MSM1246</b> | isopropylmalate synthase, LeuA                                              |  |  |  |  |  |
| <b>MSM1261</b> | ATP phosphoribosyltransferase, HisG                                         |  |  |  |  |  |
| <b>MSM1263</b> | aspartate carbamoyltransferase, PyrB                                        |  |  |  |  |  |
| <b>MSM1298</b> | 3-isopropylmalate dehydrogenase, LeuB                                       |  |  |  |  |  |
| <b>MSM1299</b> | 3-isopropylmalate dehydratase, small subunit, LeuD                          |  |  |  |  |  |
| <b>MSM1300</b> | 3-isopropylmalate dehydratase, large subunit, LeuC                          |  |  |  |  |  |
| <b>MSM1327</b> | predicted CDP-glycerol:poly(glycerophosphate) glycerophosphotransferase     |  |  |  |  |  |
| <b>MSM1337</b> | glycine hydroxymethyltransferase, GlyA                                      |  |  |  |  |  |
| <b>MSM1340</b> | archaeal S-adenosylmethionine synthetase, MetK                              |  |  |  |  |  |
| <b>MSM1341</b> | isoleucyl-tRNA synthetase, IleS                                             |  |  |  |  |  |
| <b>MSM1364</b> | imidazoleglycerol-phosphate synthase, HisF                                  |  |  |  |  |  |
| <b>MSM1368</b> | N-acetylornithine aminotransferase, ArgD                                    |  |  |  |  |  |
| <b>MSM1371</b> | diaminopimelate decarboxylase, LysA                                         |  |  |  |  |  |
| <b>MSM1372</b> | diaminopimelate epimerase, DapF                                             |  |  |  |  |  |
| <b>MSM1387</b> | lysyl-tRNA synthetase (class I), LysS                                       |  |  |  |  |  |
| <b>MSM1389</b> | sugar kinase, ribokinase/pfkB superfamily                                   |  |  |  |  |  |
| <b>MSM1396</b> | tungsten formylmethanofuran dehydrogenase, subunit E, FwdE                  |  |  |  |  |  |

|         |                                                                                               |  |  |  |  |  |  |
|---------|-----------------------------------------------------------------------------------------------|--|--|--|--|--|--|
| MSM1404 | formate dehydrogenase, alpha subunit, FdhA                                                    |  |  |  |  |  |  |
| MSM1414 | tungsten formylmethanofuran dehydrogenase, subunit C, FwdC                                    |  |  |  |  |  |  |
| MSM1418 | glutamine synthetase, GlnA                                                                    |  |  |  |  |  |  |
| MSM1440 | predicted archaeal kinase                                                                     |  |  |  |  |  |  |
| MSM1452 | glutamyl-tRNA synthetase, GltX                                                                |  |  |  |  |  |  |
| MSM1461 | methyl viologen-reducing hydrogenase, delta subunit, MvhD                                     |  |  |  |  |  |  |
| MSM1474 | chorismate synthase, AroC                                                                     |  |  |  |  |  |  |
| MSM1478 | phenylalanyl-tRNA synthetase, PheS                                                            |  |  |  |  |  |  |
| MSM1594 | glycosyltransferase/CDP-glycerol:poly(glycerophosphate) glycerophosphotransferase, GT2 family |  |  |  |  |  |  |
| MSM1602 | glycosyltransferase/CDP-glycerol:poly(glycerophosphate) glycerophosphotransferase, GT2 family |  |  |  |  |  |  |
| MSM1636 | ProFAR isomerase-related protein                                                              |  |  |  |  |  |  |
| MSM1710 | seryl-tRNA synthetase, SerS                                                                   |  |  |  |  |  |  |
| MSM1713 | predicted regulatory protein, amino acid-binding ACT domain family                            |  |  |  |  |  |  |

**COFACTOR/  
VITAMIN  
METABOLISM**

| <i>M. smithii</i> genes | Annotation                                                                       | GO:0046872 - metal ion binding | GO:0005506 - iron ion binding | GO:0050661 - NADP binding | GO:0006767 - water-soluble vitamin metabolism | GO:0042727 - riboflavin and derivative biosynthesis | GO:0008703 - 5-amino-6-(5-phosphoribosylamino)uracil reductase |
|-------------------------|----------------------------------------------------------------------------------|--------------------------------|-------------------------------|---------------------------|-----------------------------------------------|-----------------------------------------------------|----------------------------------------------------------------|
| MSM0027                 | glutamate synthase, domain 2 with rubredoxin                                     |                                |                               |                           |                                               |                                                     |                                                                |
| MSM0029                 | putative calcium-binding protein                                                 |                                |                               |                           |                                               |                                                     |                                                                |
| MSM0052                 | adhesin-like protein                                                             |                                |                               |                           |                                               |                                                     |                                                                |
| MSM0065                 | riboflavin-specific deaminase                                                    |                                |                               |                           |                                               |                                                     |                                                                |
| MSM0079                 | CofH protein (7,8-didemethyl-8-hydroxy-5-deazariboflavin (FO)/F420 biosynthesis) |                                |                               |                           |                                               |                                                     |                                                                |
| MSM0082                 | heterodisulfide reductase, subunit A, HdrA                                       |                                |                               |                           |                                               |                                                     |                                                                |
| MSM0084                 | heterodisulfide reductase, subunit C, HdrC                                       |                                |                               |                           |                                               |                                                     |                                                                |
| MSM0085                 | putative ferredoxin                                                              |                                |                               |                           |                                               |                                                     |                                                                |
| MSM0101                 | precoirrin-3 methylase, CbiF                                                     |                                |                               |                           |                                               |                                                     |                                                                |
| MSM0107                 | hydrogenase expression/formation protein, HypB                                   |                                |                               |                           |                                               |                                                     |                                                                |
| MSM0108                 | hydrogenase nickel incorporation protein, HypA                                   |                                |                               |                           |                                               |                                                     |                                                                |
| MSM0129                 | nicotinamide mononucleotide adenyltransferase, NadR                              |                                |                               |                           |                                               |                                                     |                                                                |
| MSM0131                 | molybdenum-binding protein, MopI                                                 |                                |                               |                           |                                               |                                                     |                                                                |
| MSM0135                 | coenzyme F420-reducing hydrogenase, beta subunit                                 |                                |                               |                           |                                               |                                                     |                                                                |
| MSM0136                 | putative ferredoxin                                                              |                                |                               |                           |                                               |                                                     |                                                                |
| MSM0148                 | predicted oxidoreductase, aldo/keto reductase family                             |                                |                               |                           |                                               |                                                     |                                                                |
| MSM0153                 | predicted phosphoglycerate mutase                                                |                                |                               |                           |                                               |                                                     |                                                                |
| MSM0187                 | rubredoxin                                                                       |                                |                               |                           |                                               |                                                     |                                                                |
| MSM0188                 | rubredoxin                                                                       |                                |                               |                           |                                               |                                                     |                                                                |
| MSM0198                 | inorganic pyrophosphatase                                                        |                                |                               |                           |                                               |                                                     |                                                                |
| MSM0203                 | nucleoside diphosphate kinase, Ndk                                               |                                |                               |                           |                                               |                                                     |                                                                |
| MSM0209                 | ferredoxin                                                                       |                                |                               |                           |                                               |                                                     |                                                                |
| MSM0218                 | iron dependent transcriptional regulator (Fe2+-binding)                          |                                |                               |                           |                                               |                                                     |                                                                |
| MSM0238                 | precoirrin-6B methylase, CbiT                                                    |                                |                               |                           |                                               |                                                     |                                                                |

|                |                                                                                                                 |  |  |  |  |  |
|----------------|-----------------------------------------------------------------------------------------------------------------|--|--|--|--|--|
| <b>MSM0262</b> | desulfoferrodoxin (dfx)                                                                                         |  |  |  |  |  |
| <b>MSM0262</b> | desulfoferrodoxin (dfx)                                                                                         |  |  |  |  |  |
| <b>MSM0266</b> | adhesin-like protein                                                                                            |  |  |  |  |  |
| <b>MSM0272</b> | endonuclease III                                                                                                |  |  |  |  |  |
| <b>MSM0284</b> | ribose 5-phosphate isomerase, RpiA                                                                              |  |  |  |  |  |
| <b>MSM0289</b> | phosphomethylpyrimidine kinase (HMPP-kinase), ThiD                                                              |  |  |  |  |  |
| <b>MSM0306</b> | polyferredoxin, iron-sulfur binding                                                                             |  |  |  |  |  |
| <b>MSM0310</b> | polyferredoxin, iron-sulfur binding                                                                             |  |  |  |  |  |
| <b>MSM0311</b> | polyferredoxin, iron-sulfur binding                                                                             |  |  |  |  |  |
| <b>MSM0312</b> | [NiFe]-hydrogenase-3-type complex, large subunit/NADH:quinone oxidoreductase (complex I), subunit 49K/NdhH/NuoD |  |  |  |  |  |
| <b>MSM0331</b> | 2-oxoisovalerate ferredoxin oxidoreductase, delta subunit                                                       |  |  |  |  |  |
| <b>MSM0357</b> | conserved hypothetical membrane protein (possible Zinc-binding)                                                 |  |  |  |  |  |
| <b>MSM0368</b> | glutamate synthase (NADPH), subunit 2                                                                           |  |  |  |  |  |
| <b>MSM0376</b> | alcohol dehydrogenase (zinc-binding), GroES-like                                                                |  |  |  |  |  |
| <b>MSM0385</b> | anaerobic magnesium-protoporphyrin IX monomethyl ester cyclase, Elongator protein 3/MiaB/NifB family            |  |  |  |  |  |
| <b>MSM0392</b> | indolepyruvate ferredoxin oxidoreductase, alpha subunit                                                         |  |  |  |  |  |
| <b>MSM0393</b> | fumarate reductase, iron-sulfur protein                                                                         |  |  |  |  |  |
| <b>MSM0395</b> | ferredoxin, iron-sulfur binding                                                                                 |  |  |  |  |  |
| <b>MSM0409</b> | C4-type Zinc-finger protein                                                                                     |  |  |  |  |  |
| <b>MSM0424</b> | transcription initiation factor TFIIIB (zinc-binding)                                                           |  |  |  |  |  |
| <b>MSM0491</b> | nicotinate-nucleotide pyrophosphorylase (carboxylating), NadC                                                   |  |  |  |  |  |
| <b>MSM0494</b> | quinolinate synthetase, subunit A, NadA                                                                         |  |  |  |  |  |
| <b>MSM0516</b> | corrinoid protein (methionine synthase-related), MtaC                                                           |  |  |  |  |  |
| <b>MSM0517</b> | methyltransferase activation protein, MapA                                                                      |  |  |  |  |  |
| <b>MSM0517</b> | methyltransferase activation protein, MapA                                                                      |  |  |  |  |  |
| <b>MSM0538</b> | pyruvate formate-lyase activating enzyme, PflA                                                                  |  |  |  |  |  |
| <b>MSM0543</b> | DNA repair photolyase, SplB                                                                                     |  |  |  |  |  |
| <b>MSM0544</b> | predicted Fe-S oxidoreductase                                                                                   |  |  |  |  |  |
| <b>MSM0558</b> | pyruvate:ferredoxin oxidoreductase, delta subunit, PorD                                                         |  |  |  |  |  |
| <b>MSM0561</b> | formate dehydrogenase, iron-sulfur subunit                                                                      |  |  |  |  |  |
| <b>MSM0562</b> | formate dehydrogenase, iron-sulfur subunit                                                                      |  |  |  |  |  |
| <b>MSM0573</b> | biotin synthetase, BioB                                                                                         |  |  |  |  |  |
| <b>MSM0579</b> | polyferredoxin, iron-sulfur binding                                                                             |  |  |  |  |  |
| <b>MSM0583</b> | cobalt ABC transporter, permease component, CbiM                                                                |  |  |  |  |  |
| <b>MSM0585</b> | cobalt ABC transporter, permease component, CbiQ                                                                |  |  |  |  |  |
| <b>MSM0607</b> | predicted ATPase, RNase L inhibitor family                                                                      |  |  |  |  |  |
| <b>MSM0607</b> | predicted ATPase, RNase L inhibitor family                                                                      |  |  |  |  |  |
| <b>MSM0609</b> | ferredoxin, iron-sulfur binding                                                                                 |  |  |  |  |  |
| <b>MSM0616</b> | adhesin-like protein                                                                                            |  |  |  |  |  |

|                |                                                                  |  |  |  |  |  |  |  |
|----------------|------------------------------------------------------------------|--|--|--|--|--|--|--|
| <b>MSM0617</b> | thiamine biosynthesis ATP pyrophosphatase, ThiI                  |  |  |  |  |  |  |  |
| <b>MSM0644</b> | thiamine biosynthesis protein, ThiC                              |  |  |  |  |  |  |  |
| <b>MSM0652</b> | pyruvate formate-lyase activating enzyme, PflA                   |  |  |  |  |  |  |  |
| <b>MSM0657</b> | phosphoglycerate mutase, AP superfamily                          |  |  |  |  |  |  |  |
| <b>MSM0696</b> | Fe-S oxidoreductase                                              |  |  |  |  |  |  |  |
| <b>MSM0723</b> | 3-isopropylmalate dehydratase, LeuC                              |  |  |  |  |  |  |  |
| <b>MSM0723</b> | 3-isopropylmalate dehydratase, LeuC                              |  |  |  |  |  |  |  |
| <b>MSM0728</b> | predicted oxidoreductase, aldo/keto reductase family             |  |  |  |  |  |  |  |
| <b>MSM0771</b> | cobalt ABC transporter, permease component, CbiQ                 |  |  |  |  |  |  |  |
| <b>MSM0783</b> | tungsten formylmethanofuran dehydrogenase, subunit F, FwdF       |  |  |  |  |  |  |  |
| <b>MSM0784</b> | ferredoxin                                                       |  |  |  |  |  |  |  |
| <b>MSM0787</b> | Fe-S oxidoreductase                                              |  |  |  |  |  |  |  |
| <b>MSM0796</b> | heterodisulfide reductase, subunit C, HdrC                       |  |  |  |  |  |  |  |
| <b>MSM0808</b> | nitrogenase iron-molybdenum cofactor biosynthesis protein, NifB  |  |  |  |  |  |  |  |
| <b>MSM0829</b> | aspartate-semialdehyde dehydrogenase, Asd                        |  |  |  |  |  |  |  |
| <b>MSM0837</b> | cobalamin biosynthesis protein D, CbiD                           |  |  |  |  |  |  |  |
| <b>MSM0842</b> | histone acetyltransferase, radical SAM superfamily               |  |  |  |  |  |  |  |
| <b>MSM0845</b> | 2-methylthioadenine synthetase, MiaB                             |  |  |  |  |  |  |  |
| <b>MSM0849</b> | molybdenum cofactor biosynthesis-related protein, MoaA           |  |  |  |  |  |  |  |
| <b>MSM0865</b> | putative glucose-methanol-choline oxidoreductase (FAD-dependent) |  |  |  |  |  |  |  |
| <b>MSM0892</b> | putative zinc-binding protein                                    |  |  |  |  |  |  |  |
| <b>MSM0895</b> | cation transport ATPase, HAD family                              |  |  |  |  |  |  |  |
| <b>MSM0896</b> | precorrin-6X reductase, CbiJ                                     |  |  |  |  |  |  |  |
| <b>MSM0916</b> | hydroxyethylthiazole kinase, ThiM                                |  |  |  |  |  |  |  |
| <b>MSM0917</b> | thiamine monophosphate synthase, ThiE                            |  |  |  |  |  |  |  |
| <b>MSM0922</b> | Fe-S oxidoreductase                                              |  |  |  |  |  |  |  |
| <b>MSM0928</b> | 2-oxoglutarate ferredoxin oxidoreductase, delta subunit, KorD    |  |  |  |  |  |  |  |
| <b>MSM0933</b> | cobalamin-5-phosphate synthase, CobS                             |  |  |  |  |  |  |  |
| <b>MSM0960</b> | cation transport ATPase, HAD family                              |  |  |  |  |  |  |  |
| <b>MSM0961</b> | heavy-metal cation transporting ATPase                           |  |  |  |  |  |  |  |
| <b>MSM0962</b> | glyceraldehyde 3-phosphate dehydrogenase, GapA                   |  |  |  |  |  |  |  |
| <b>MSM0998</b> | polyferredoxin, MvhB                                             |  |  |  |  |  |  |  |
| <b>MSM0999</b> | methyl viologen-reducing hydrogenase, alpha subunit, MvhA        |  |  |  |  |  |  |  |
| <b>MSM1020</b> | Fe-S oxidoreductase, Radical SAM family                          |  |  |  |  |  |  |  |
| <b>MSM1035</b> | FO synthase subunit 1 (SAM-dependent), CofG (F420 biosynthesis)  |  |  |  |  |  |  |  |
| <b>MSM1043</b> | dihydroorotate dehydrogenase electron transfer subunit, PyrK     |  |  |  |  |  |  |  |
| <b>MSM1055</b> | coenzyme PQQ synthesis protein, SAM family                       |  |  |  |  |  |  |  |
| <b>MSM1063</b> | energy-converting hydrogenase B, subunit N, EhbN                 |  |  |  |  |  |  |  |
| <b>MSM1065</b> | energy-converting hydrogenase B, subunit L, EhbL                 |  |  |  |  |  |  |  |
| <b>MSM1066</b> | energy-converting hydrogenase B, subunit K, EhbK                 |  |  |  |  |  |  |  |

|                |                                                             |  |  |  |  |  |  |
|----------------|-------------------------------------------------------------|--|--|--|--|--|--|
| <b>MSM1099</b> | biotin synthase related protein                             |  |  |  |  |  |  |
| <b>MSM1106</b> | hydrogenase maturation factor, HypF                         |  |  |  |  |  |  |
| <b>MSM1111</b> | adhesin-like protein                                        |  |  |  |  |  |  |
| <b>MSM1112</b> | adhesin-like protein                                        |  |  |  |  |  |  |
| <b>MSM1122</b> | coenzyme F420-reducing hydrogenase, gamma subunit, FrhG     |  |  |  |  |  |  |
| <b>MSM1123</b> | coenzyme F420-reducing hydrogenase, delta subunit, FrhD     |  |  |  |  |  |  |
| <b>MSM1124</b> | coenzyme F420-reducing hydrogenase, alpha subunit, FrhA     |  |  |  |  |  |  |
| <b>MSM1127</b> | cation transport ATPase, HAD family                         |  |  |  |  |  |  |
| <b>MSM1138</b> | predicted glutamine amidotransferase, CobB/CobQ-like family |  |  |  |  |  |  |
| <b>MSM1153</b> | cation transport ATPase, HAD family                         |  |  |  |  |  |  |
| <b>MSM1167</b> | cobalt precorrin-6Y C5,15-methyltransferase, CbiE           |  |  |  |  |  |  |
| <b>MSM1171</b> | ammonia-dependent NAD <sup>+</sup> synthetase, NadE         |  |  |  |  |  |  |
| <b>MSM1174</b> | heat shock protein HtpX (Zn-dependent)                      |  |  |  |  |  |  |
| <b>MSM1179</b> | shikimate 5-dehydrogenase, AroE                             |  |  |  |  |  |  |
| <b>MSM1198</b> | O-sialoglycoprotein endopeptidase                           |  |  |  |  |  |  |
| <b>MSM1200</b> | phosphoribosyltransferase, CobT                             |  |  |  |  |  |  |
| <b>MSM1215</b> | cobyrinic acid a,c-diamide synthase, CbiA                   |  |  |  |  |  |  |
| <b>MSM1223</b> | carbonic anhydrase                                          |  |  |  |  |  |  |
| <b>MSM1230</b> | transcriptional regulator, MarR family                      |  |  |  |  |  |  |
| <b>MSM1234</b> | cobalt-precorrin-8X methylmutase, CbiC                      |  |  |  |  |  |  |
| <b>MSM1238</b> | histidinol dehydrogenase, HisD                              |  |  |  |  |  |  |
| <b>MSM1239</b> | predicted DNA-binding protein                               |  |  |  |  |  |  |
| <b>MSM1241</b> | chromosome partitioning ATPase                              |  |  |  |  |  |  |
| <b>MSM1254</b> | cobyric acid synthase                                       |  |  |  |  |  |  |
| <b>MSM1256</b> | 3,4-dihydroxy-2-butanone 4-phosphate synthase, RibB         |  |  |  |  |  |  |
| <b>MSM1266</b> | cobalamin biosynthesis protein D, CobD                      |  |  |  |  |  |  |
| <b>MSM1267</b> | cobalamin biosynthesis protein G, CbiG                      |  |  |  |  |  |  |
| <b>MSM1273</b> | cobalt precorrin-3B C17-methyltransferase, CbiH             |  |  |  |  |  |  |
| <b>MSM1283</b> | thiamine monphosphate kinase, ThiL                          |  |  |  |  |  |  |
| <b>MSM1284</b> | pyruvate formate-lyase activating enzyme, PflA              |  |  |  |  |  |  |
| <b>MSM1296</b> | riboflavin synthase, beta subunit, RibH                     |  |  |  |  |  |  |
| <b>MSM1300</b> | 3-isopropylmalate dehydratase, large subunit, LeuC          |  |  |  |  |  |  |
| <b>MSM1301</b> | predicted Fe-S oxidoreductase                               |  |  |  |  |  |  |
| <b>MSM1336</b> | heterodisulfide reductase, subunit A, HdrA                  |  |  |  |  |  |  |
| <b>MSM1338</b> | archaeal flavoprotein                                       |  |  |  |  |  |  |
| <b>MSM1348</b> | rubrerythrin                                                |  |  |  |  |  |  |
| <b>MSM1351</b> | precorrin-2 C20-methyltransferase, CbiL                     |  |  |  |  |  |  |
| <b>MSM1354</b> | DNA-directed RNA polymerase subunit M, RpoM                 |  |  |  |  |  |  |
| <b>MSM1380</b> | NADP-dependent alcohol dehydrogenase                        |  |  |  |  |  |  |
| <b>MSM1386</b> | cytosine deaminase                                          |  |  |  |  |  |  |
| <b>MSM1388</b> | thiamine biosynthesis protein, ThiC                         |  |  |  |  |  |  |
| <b>MSM1404</b> | formate dehydrogenase, alpha subunit, FdhA                  |  |  |  |  |  |  |
| <b>MSM1405</b> | formate dehydrogenase, beta subunit, FdhB                   |  |  |  |  |  |  |



|         |                                                            |  |  |  |  |  |  |
|---------|------------------------------------------------------------|--|--|--|--|--|--|
| MSM1406 | molybdopterin cofactor biosynthesis protein A, MoaA        |  |  |  |  |  |  |
| MSM1408 | tungsten formylmethanofuran dehydrogenase, subunit E, FwdE |  |  |  |  |  |  |
| MSM1409 | tungsten formylmethanofuran dehydrogenase, subunit F, FwdF |  |  |  |  |  |  |
| MSM1410 | tungsten formylmethanofuran dehydrogenase, subunit G, FwdG |  |  |  |  |  |  |
| MSM1411 | tungsten formylmethanofuran dehydrogenase, subunit D, FwdD |  |  |  |  |  |  |
| MSM1436 | ferredoxin                                                 |  |  |  |  |  |  |
| MSM1446 | predicted hydroxylamine reductase, Hcp                     |  |  |  |  |  |  |
| MSM1450 | predicted oxidoreductase, aldo/keto reductase family       |  |  |  |  |  |  |
| MSM1460 | energy-converting hydrogenase B, subunit K, EhbK           |  |  |  |  |  |  |
| MSM1462 | formate dehydrogenase, beta subunit, FdhB                  |  |  |  |  |  |  |
| MSM1488 | cobalt ABC transporter, permease component, CbiM           |  |  |  |  |  |  |
| MSM1497 | predicted coenzyme PQQ synthesis protein                   |  |  |  |  |  |  |
| MSM1565 | cobyric acid synthase, CobQ                                |  |  |  |  |  |  |
| MSM1567 | adhesin-like protein                                       |  |  |  |  |  |  |
| MSM1590 | adhesin-like protein                                       |  |  |  |  |  |  |
| MSM1606 | arylsulfatase regulator, AslB                              |  |  |  |  |  |  |
| MSM1608 | predicted oxidoreductase, aldo/keto reductase family       |  |  |  |  |  |  |
| MSM1618 | cobalamin biosynthesis protein M, CbiM                     |  |  |  |  |  |  |
| MSM1619 | cobalt ABC transporter, substrate-binding component, CbiN  |  |  |  |  |  |  |
| MSM1620 | cobalt ABC transporter, permease component, CbiQ           |  |  |  |  |  |  |
| MSM1622 | archaeal riboflavin synthase, RibC                         |  |  |  |  |  |  |
| MSM1626 | predicted fumarate reductase                               |  |  |  |  |  |  |
| MSM1655 | hypothetical protein (phage)                               |  |  |  |  |  |  |
| MSM1700 | predicted ferredoxin                                       |  |  |  |  |  |  |
| MSM1712 | predicted ferritin                                         |  |  |  |  |  |  |
| MSM1720 | DNA-directed RNA polymerase, subunit M, RpoM               |  |  |  |  |  |  |
| MSM1733 | rubrerythrin                                               |  |  |  |  |  |  |
| MSM1792 | nicotinate phosphoribosyltransferase                       |  |  |  |  |  |  |

**AMINO ACID METABOLISM**

| <i>M. smithii</i> genes | Annotation                                                                             | GO:0006519 - amino acid and derivative metabolism | GO:0008652 - amino acid biosynthesis |
|-------------------------|----------------------------------------------------------------------------------------|---------------------------------------------------|--------------------------------------|
| MSM0027                 | glutamate synthase, domain 2 with rubredoxin                                           |                                                   |                                      |
| MSM0071                 | methionyl-tRNA synthetase, MetG                                                        |                                                   |                                      |
| MSM0089                 | pyrroline-5-carboxylate reductase (NADP oxidoreductase, coenzyme F420 dependent), ProC |                                                   |                                      |
| MSM0102                 | cobalamin-independent methionine synthase, MetE                                        |                                                   |                                      |
| MSM0154                 | homoserine dehydrogenase, ThrA                                                         |                                                   |                                      |
| MSM0160                 | asparagine synthetase, AsnB                                                            |                                                   |                                      |
| MSM0174                 | O-acetylhomoserine sulfhydrylase (PLP-dependent), MET17                                |                                                   |                                      |
| MSM0175                 | homoserine O-acetyltransferase, MetX                                                   |                                                   |                                      |

|                |                                                                                        |  |
|----------------|----------------------------------------------------------------------------------------|--|
| <b>MSM0214</b> | threonine synthase (pyridoxal-phosphate dependent), ThrC                               |  |
| <b>MSM0216</b> | tryptophanyl-tRNA synthetase, TrpS                                                     |  |
| <b>MSM0231</b> | 3-dehydroquinate dehydratase                                                           |  |
| <b>MSM0265</b> | O-acetylhomoserine sulfhydrylase                                                       |  |
| <b>MSM0268</b> | cysteinyl-tRNA synthetase, CysS                                                        |  |
| <b>MSM0270</b> | serine acetyltransferase, CysE                                                         |  |
| <b>MSM0271</b> | cysteine synthase, CysK                                                                |  |
| <b>MSM0273</b> | EPSP synthase (3-phosphoshikimate 1-carboxyvinyltransferase)                           |  |
| <b>MSM0275</b> | valyl-tRNA synthetase, ValS                                                            |  |
| <b>MSM0277</b> | phenylalanyl-tRNA synthetase, beta subunit, PheT                                       |  |
| <b>MSM0286</b> | glycerol 1-phosphate dehydrogenase (Dehydroquinase synthase-like family)               |  |
| <b>MSM0287</b> | prolyl-tRNA synthetase, ProS                                                           |  |
| <b>MSM0334</b> | L-asparaginase, GatD                                                                   |  |
| <b>MSM0343</b> | GMP synthase (glutamine-hydrolysing), subunit A, GuaA                                  |  |
| <b>MSM0368</b> | glutamate synthase (NADPH), subunit 2                                                  |  |
| <b>MSM0371</b> | predicted glutamine amidotransferase involved in pyridoxine biosynthesis, Pdx2         |  |
| <b>MSM0373</b> | isocitrate/isopropylmalate dehydrogenase, LeuB                                         |  |
| <b>MSM0375</b> | acetylglutamate kinase, ArgB                                                           |  |
| <b>MSM0379</b> | glutamate N-acetyltransferase, ArgJ                                                    |  |
| <b>MSM0388</b> | amino acid regulator                                                                   |  |
| <b>MSM0403</b> | glycyl-tRNA synthetase                                                                 |  |
| <b>MSM0415</b> | uridylate kinase, PyrH                                                                 |  |
| <b>MSM0457</b> | D-3-phosphoglycerate dehydrogenase, SerA                                               |  |
| <b>MSM0488</b> | carbamoylphosphate synthase, large subunit, CarB                                       |  |
| <b>MSM0489</b> | carbamoylphosphate synthase, small subunit, CarA                                       |  |
| <b>MSM0513</b> | tyrosyl-tRNA synthetase, TyrS                                                          |  |
| <b>MSM0516</b> | corrinoid protein (methionine synthase-related), MtaC                                  |  |
| <b>MSM0604</b> | predicted archaeal aspartate/glutamate/uridylate kinase                                |  |
| <b>MSM0619</b> | alanyl-tRNA synthetase, AlaS                                                           |  |
| <b>MSM0641</b> | prephenate dehydrogenase (NADP+)                                                       |  |
| <b>MSM0653</b> | histidinol-phosphate aminotransferase, HisC                                            |  |
| <b>MSM0719</b> | phosphoserine phosphatase, HAD family, SerB                                            |  |
| <b>MSM0723</b> | 3-isopropylmalate dehydratase, LeuC                                                    |  |
| <b>MSM0829</b> | aspartate-semialdehyde dehydrogenase, Asd                                              |  |
| <b>MSM0830</b> | dihydrodipicolinate reductase, DapB                                                    |  |
| <b>MSM0832</b> | aspartokinase, alpha subunit                                                           |  |
| <b>MSM0834</b> | chorismate mutase                                                                      |  |
| <b>MSM0835</b> | archaeal shikimate kinase                                                              |  |
| <b>MSM0847</b> | archaeal 3-isopropylmalate dehydratase, small subunit, LeuD                            |  |
| <b>MSM0858</b> | phosphoribosylformimino-5-aminoimidazole carboxamide ribotide (ProFAR) isomerase, HisA |  |
| <b>MSM0860</b> | aspartate-semialdehyde dehydrogenase, ArgC                                             |  |
| <b>MSM0876</b> | arginase/agmatinase/formimionoglutamate hydrolase, SpeB                                |  |
| <b>MSM0878</b> | pyruvoyl-dependent arginine decarboxylase, PdaD                                        |  |

|                |                                                                    |  |
|----------------|--------------------------------------------------------------------|--|
| <b>MSM0888</b> | glutamate dehydrogenase (NADP+), GdhA                              |  |
| <b>MSM0967</b> | glutamyl-tRNA reductase, HemA                                      |  |
| <b>MSM1052</b> | prephenate dehydratase, PheA                                       |  |
| <b>MSM1084</b> | argininosuccinate synthase, ArgG                                   |  |
| <b>MSM1103</b> | phosphoribosyl-ATP pyrophosphohydrolase, HisE                      |  |
| <b>MSM1141</b> | tryptophan synthase, alpha subunit, TrpA                           |  |
| <b>MSM1142</b> | tryptophan synthase, beta subunit, TrpB                            |  |
| <b>MSM1143</b> | indole-3-glycerol phosphate synthase, TrpC                         |  |
| <b>MSM1144</b> | anthranilate phosphoribosyltransferase, TrpD                       |  |
| <b>MSM1145</b> | anthranilate/para-aminobenzoate synthase component II, TrpG        |  |
| <b>MSM1159</b> | glutamine amidotransferase, HisH                                   |  |
| <b>MSM1172</b> | leucyl-tRNA synthetase, LeuS                                       |  |
| <b>MSM1179</b> | shikimate 5-dehydrogenase, AroE                                    |  |
| <b>MSM1181</b> | histidyl-tRNA synthetase, HisS                                     |  |
| <b>MSM1182</b> | phosphoribosyl-AMP cyclohydrolase, HisI                            |  |
| <b>MSM1202</b> | branched-chain-amino-acid aminotransferase, IlvE                   |  |
| <b>MSM1206</b> | imidazoleglycerol-phosphate dehydrogenase, HisB                    |  |
| <b>MSM1214</b> | threonyl-tRNA synthetase, ThrS                                     |  |
| <b>MSM1222</b> | ketol-acid reductoisomerase, IlvC                                  |  |
| <b>MSM1224</b> | acetolactate synthase, small subunit (regulatory), IlvH            |  |
| <b>MSM1226</b> | ornithine carbamoyltransferase, ArgF                               |  |
| <b>MSM1231</b> | arginyl-tRNA synthetase, ArgS                                      |  |
| <b>MSM1236</b> | aspartyl-tRNA synthetase, AspS                                     |  |
| <b>MSM1237</b> | dihydroxy-acid dehydratase, IlvD                                   |  |
| <b>MSM1238</b> | histidinol dehydrogenase, HisD                                     |  |
| <b>MSM1242</b> | tryptophan synthase, beta subunit, TrpB                            |  |
| <b>MSM1261</b> | ATP phosphoribosyltransferase, HisG                                |  |
| <b>MSM1263</b> | aspartate carbamoyltransferase, PyrB                               |  |
| <b>MSM1298</b> | 3-isopropylmalate dehydrogenase, LeuB                              |  |
| <b>MSM1299</b> | 3-isopropylmalate dehydratase, small subunit, LeuD                 |  |
| <b>MSM1300</b> | 3-isopropylmalate dehydratase, large subunit, LeuC                 |  |
| <b>MSM1337</b> | glycine hydroxymethyltransferase, GlyA                             |  |
| <b>MSM1341</b> | isoleucyl-tRNA synthetase, IleS                                    |  |
| <b>MSM1364</b> | imidazoleglycerol-phosphate synthase, HisF                         |  |
| <b>MSM1368</b> | N-acetylornithine aminotransferase, ArgD                           |  |
| <b>MSM1371</b> | diaminopimelate decarboxylase, LysA                                |  |
| <b>MSM1372</b> | diaminopimelate epimerase, DapF                                    |  |
| <b>MSM1387</b> | lysyl-tRNA synthetase (class I), LysS                              |  |
| <b>MSM1418</b> | glutamine synthetase, GlnA                                         |  |
| <b>MSM1440</b> | predicted archaeal kinase                                          |  |
| <b>MSM1452</b> | glutamyl-tRNA synthetase, GltX                                     |  |
| <b>MSM1474</b> | chorismate synthase, AroC                                          |  |
| <b>MSM1478</b> | phenylalanyl-tRNA synthetase, PheS                                 |  |
| <b>MSM1615</b> | deoxyhypusine synthase, Dys                                        |  |
| <b>MSM1636</b> | ProFAR isomerase-related protein                                   |  |
| <b>MSM1710</b> | seryl-tRNA synthetase, SerS                                        |  |
| <b>MSM1713</b> | predicted regulatory protein, amino acid-binding ACT domain family |  |

**DEPLETED COMPARED TO SEQUENCED ARCHAEA AND/OR NON-GUT METHANOGENS**

| ENVIRONMENTAL SENSING   | <i>M. smithii</i> genes | Annotation                                                                      | GO:0004672 - protein kinase activity | GO:0007165 - signal transduction      | GO:0000160 - two-component signal transduction |
|-------------------------|-------------------------|---------------------------------------------------------------------------------|--------------------------------------|---------------------------------------|------------------------------------------------|
|                         | MSM0485                 | universal stress protein, UspA                                                  |                                      |                                       |                                                |
|                         | MSM0525                 | predicted unusual protein kinase, ubiquinone biosynthesis protein-related, AarF |                                      |                                       |                                                |
|                         | MSM0869                 | GTPase, GTP1/OBG family                                                         |                                      |                                       |                                                |
|                         | MSM0896                 | precoirrin-6X reductase, CbiJ                                                   |                                      |                                       |                                                |
|                         | MSM0952                 | serine/threonine protein kinase, RIO1 family                                    |                                      |                                       |                                                |
|                         | MSM1198                 | O-sialoglycoprotein endopeptidase                                               |                                      |                                       |                                                |
| TRANSCRIPTIONAL CONTROL | <i>M. smithii</i> genes | Annotation                                                                      | GO:0006350 - transcription           | GO:0019222 - regulation of metabolism | GO:0045449 - regulation of transcription       |
|                         | MSM0067                 | conserved hypothetical protein                                                  |                                      |                                       |                                                |
|                         | MSM0069                 | conserved hypothetical protein                                                  |                                      |                                       |                                                |
|                         | MSM0094                 | predicted transcription regulator (TetR family)                                 |                                      |                                       |                                                |
|                         | MSM0196                 | archaeal DNA-dependent RNA polymerase, subunit E, RpoE                          |                                      |                                       |                                                |
|                         | MSM0197                 | archaeal DNA-dependent RNA polymerase, subunit E, RpoE                          |                                      |                                       |                                                |
|                         | MSM0218                 | iron dependent transcriptional regulator (Fe <sup>2+</sup> -binding)            |                                      |                                       |                                                |
|                         | MSM0233                 | nitrogen regulatory protein P-II, GlnK                                          |                                      |                                       |                                                |
|                         | MSM0288                 | conserved hypothetical protein (DUF121 daomain)                                 |                                      |                                       |                                                |
|                         | MSM0334                 | L-asparaginase, GatD,                                                           |                                      |                                       |                                                |
|                         | MSM0364                 | transcriptional regulator (nickel-responsive), NikR                             |                                      |                                       |                                                |
|                         | MSM0413                 | transcriptional regulator, MarR family                                          |                                      |                                       |                                                |
|                         | MSM0424                 | transcription initiation factor TFIIB (zinc-binding)                            |                                      |                                       |                                                |
|                         | MSM0600                 | transcriptional regulator, MarR family                                          |                                      |                                       |                                                |
|                         | MSM0624                 | transcription antiterminator, NusG                                              |                                      |                                       |                                                |
|                         | MSM0631                 | transcription initiation factor IIE, alpha subunit                              |                                      |                                       |                                                |
|                         | MSM0650                 | transcriptional regulator, TetR/AcrR family                                     |                                      |                                       |                                                |
|                         | MSM0720                 | transcription initiation factor TFIID TATA binding protein                      |                                      |                                       |                                                |
|                         | MSM0767                 | selenocysteine synthase, SclA                                                   |                                      |                                       |                                                |
|                         | MSM0775                 | transcriptional regulator, AraC family                                          |                                      |                                       |                                                |
|                         | MSM0817                 | predicted transcriptional regulator                                             |                                      |                                       |                                                |
|                         | MSM0896                 | precoirrin-6X reductase, CbiJ                                                   |                                      |                                       |                                                |
|                         | MSM0908                 | DNA-dependent RNA polymerase, subunit A, RpoA                                   |                                      |                                       |                                                |
|                         | MSM0909                 | DNA-dependent RNA polymerase, subunit A', RpoA                                  |                                      |                                       |                                                |
|                         | MSM0910                 | DNA-dependent RNA polymerase, subunit B', RpoB                                  |                                      |                                       |                                                |
|                         | MSM0911                 | DNA-dependent RNA polymerase, subunit B, RpoB                                   |                                      |                                       |                                                |
|                         | MSM0912                 | DNA-dependent RNA polymerase, subunit H, RpoH                                   |                                      |                                       |                                                |
|                         | MSM1032                 | transcriptional regulator, Lrp family                                           |                                      |                                       |                                                |

|         |                                                            |  |  |
|---------|------------------------------------------------------------|--|--|
| MSM1087 | NAD-dependent protein deacetylase, SIR2 family             |  |  |
| MSM1107 | predicted transcriptional regulator                        |  |  |
| MSM1126 | predicted transcriptional regulator, ArsR family           |  |  |
| MSM1137 | DNA polymerase sliding clamp subunit, PCNA family, Pcn     |  |  |
| MSM1207 | molybdate transport system regulatory protein              |  |  |
| MSM1230 | transcriptional regulator, MarR family                     |  |  |
| MSM1315 | predicted transcriptional regulator                        |  |  |
| MSM1350 | predicted transcriptional regulator, ArsR family           |  |  |
| MSM1354 | DNA-directed RNA polymerase subunit M, RpoM                |  |  |
| MSM1356 | DNA-directed RNA polymerase, subunit L, RpoL               |  |  |
| MSM1376 | DNA-directed RNA polymerase subunit F                      |  |  |
| MSM1390 | transcriptional regulator, LysR family                     |  |  |
| MSM1408 | tungsten formylmethanofuran dehydrogenase, subunit E, FwdE |  |  |
| MSM1428 | DNA-directed RNA polymerase, subunit D, RpoD               |  |  |
| MSM1432 | DNA-directed RNA polymerase, subunit N, RpoN               |  |  |
| MSM1433 | DNA-directed RNA polymerase, subunit K, RpoK               |  |  |
| MSM1499 | predicted transcriptional regulator                        |  |  |
| MSM1631 | predicted DNA-directed RNA polymerase II, subunit RPC10    |  |  |
| MSM1720 | DNA-directed RNA polymerase, subunit M, RpoM               |  |  |
| MSM1763 | predicted DNA-directed RNA polymerase, subunit M, RpoM     |  |  |
| MSM1764 | conserved hypothetical protein                             |  |  |
| MSM1765 | conserved hypothetical protein                             |  |  |

**PHOSPHATE METABOLISM**

| <i>M. smithii</i> genes | Annotation                                                                                                       | GO:0006796 - phosphate metabolism |
|-------------------------|------------------------------------------------------------------------------------------------------------------|-----------------------------------|
| MSM0060                 | predicted archaeal kinase (GHMP kinase family)                                                                   |                                   |
| MSM0198                 | inorganic pyrophosphatase                                                                                        |                                   |
| MSM0313                 | [NiFe]-hydrogenase-3-type complex, small subunit/NADH:quinone oxidoreductase (complex I), subunit PSST/NdhK/NuoB |                                   |
| MSM0433                 | archaeal/vacuolar-type H <sup>+</sup> -transporting ATP synthase, subunit D                                      |                                   |
| MSM0434                 | archaeal/vacuolar-type H <sup>+</sup> -transporting ATP synthase, subunit B                                      |                                   |
| MSM0435                 | archaeal/vacuolar-type H <sup>+</sup> -transporting ATP synthase, subunit A                                      |                                   |
| MSM0436                 | archaeal/vacuolar-type H <sup>+</sup> -transporting ATP synthase, subunit F                                      |                                   |
| MSM0437                 | archaeal/vacuolar-type H <sup>+</sup> -transporting ATP synthase, subunit C                                      |                                   |
| MSM0438                 | archaeal/vacuolar-type H <sup>+</sup> -transporting ATP synthase, subunit E                                      |                                   |
| MSM0439                 | archaeal/vacuolar-type H <sup>+</sup> -transporting ATP synthase, subunit K                                      |                                   |
| MSM0525                 | predicted unusual protein kinase, ubiquinone biosynthesis protein-related, AarF                                  |                                   |

|                      |                                |                                                           |                                       |
|----------------------|--------------------------------|-----------------------------------------------------------|---------------------------------------|
|                      | MSM0835                        | archaeal shikimate kinase                                 |                                       |
|                      | MSM0842                        | histone acetyltransferase, radical SAM superfamily        |                                       |
|                      | MSM0848                        | predicted archaeal sugar kinase, GHMP kinase family       |                                       |
|                      | MSM0952                        | serine/threonine protein kinase, RIO1 family              |                                       |
|                      | MSM0988                        | phosphoenolpyruvate synthase, PpsA                        |                                       |
|                      | MSM1000                        | methyl viologen-reducing hydrogenase, gamma subunit, MvhG |                                       |
|                      | MSM1064                        | energy-converting hydrogenase B, subunit M, EhbM          |                                       |
|                      | MSM1071                        | energy-converting hydrogenase B, subunit F, EhbF          |                                       |
|                      | MSM1072                        | energy-converting hydrogenase B, subunit E, EhbE          |                                       |
|                      | MSM1122                        | coenzyme F420-reducing hydrogenase, gamma subunit, FrhG   |                                       |
|                      | MSM1198                        | O-sialoglycoprotein endopeptidase                         |                                       |
|                      | MSM1424                        | polyphosphate kinase, ppk                                 |                                       |
|                      | MSM1439                        | mevalonate kinase                                         |                                       |
| <b>RECOMBINATION</b> | <b><i>M. smithii</i> genes</b> | <b>Annotation</b>                                         | <b>GO:0006310 - DNA recombination</b> |
|                      | MSM0002                        | integrase-recombinase protein                             |                                       |
|                      | MSM0428                        | integrase-recombinase protein, phage integrase family     |                                       |
|                      | MSM0611                        | DNA repair protein, RadB                                  |                                       |
|                      | MSM0645                        | ATP-dependent DNA ligase, Cdc9                            |                                       |
|                      | MSM1333                        | DNA repair protein RadA, RadA                             |                                       |
|                      | MSM1523                        | transposase                                               |                                       |
|                      | MSM1640                        | DNA intergrase/recombinase, phage integrase family        |                                       |
|                      | MSM1742                        | predicted integrase, phage integrase-like family          |                                       |
