# Supplementary material
Source: PubMed Central journal article supplement (PMC1965566)
Supplement: pnas_0704189104_14.pdf [file pnas_0704189104_14.pdf]

Table 8. *M. smithii* proteins with homologs in other sequenced Methanobacteriales

| <i>M. smithii</i> | <i>Methanosphaera stadtmanae</i> |                                                               |          | <i>Methanothermobacter thermoautotrophicus</i> |                                             |          |
|-------------------|----------------------------------|---------------------------------------------------------------|----------|------------------------------------------------|---------------------------------------------|----------|
|                   | ORF                              | ANNOTATION                                                    | E-value  | ORF                                            | ANNOTATION                                  | E-value  |
| MSM0001           | Msp_0220                         | predicted glycosyltransferase                                 | 4.2E-08  | NONE                                           |                                             |          |
| MSM0002           | Msp_1355                         | predicted site-specific recombinase/integrase                 | 2.0E-08  | MTH_893                                        | integrase-recombinase protein               | 8.1E-16  |
| MSM0003           | Msp_0548                         | hypothetical membrane-spanning protein                        | 6.8E-09  | NONE                                           |                                             |          |
| MSM0004           | Msp_0803                         | conserved hypothetical protein                                | 2.3E-24  | NONE                                           |                                             |          |
| MSM0005           | Msp_0783                         | hypothetical membrane-spanning protein                        | 3.7E-05  | MTH_1439                                       | unknown                                     | 6.2E-04  |
| MSM0006           | Msp_0725                         | hypothetical protein                                          | 1.3E-05  | MTH_1277                                       | unknown                                     | 3.3E-05  |
| MSM0007           | NONE                             |                                                               |          | MTH_675                                        | unknown                                     | 1.1E-34  |
| MSM0008           | Msp_0017                         | conserved hypothetical protein                                | 1.7E-28  | NONE                                           |                                             |          |
| MSM0009           | NONE                             |                                                               |          | MTH_675                                        | unknown                                     | 8.1E-34  |
| MSM0010           | Msp_0813                         | conserved hypothetical protein                                | 1.5E-36  | MTH_676                                        | unknown                                     | 1.7E-40  |
| MSM0011           | NONE                             |                                                               |          | NONE                                           |                                             |          |
| MSM0012           | Msp_0317                         | hypothetical protein                                          | 3.3E-04  | NONE                                           |                                             |          |
| MSM0013           | NONE                             |                                                               |          | NONE                                           |                                             |          |
| MSM0014           | NONE                             |                                                               |          | MTH_1289                                       | heat shock protein GrpE                     | 2.6E-04  |
| MSM0015           | NONE                             |                                                               |          | NONE                                           |                                             |          |
| MSM0016           | NONE                             |                                                               |          | NONE                                           |                                             |          |
| MSM0017           | NONE                             |                                                               |          | NONE                                           |                                             |          |
| MSM0018           | NONE                             |                                                               |          | NONE                                           |                                             |          |
| MSM0019           | NONE                             |                                                               |          | NONE                                           |                                             |          |
| MSM0020           | Msp_1323                         | conserved hypothetical protein                                | 1.4E-05  | MTH_83                                         | O-linked GlcNAc transferase                 | 3.3E-07  |
| MSM0021           | Msp_0047                         | predicted short chain dehydrogenase                           | 3.7E-40  | NONE                                           |                                             |          |
| MSM0022           | NONE                             |                                                               |          | NONE                                           |                                             |          |
| MSM0023           | Msp_0424                         | conserved hypothetical protein                                | 1.6E-25  | MTH_1084                                       | conserved protein                           | 4.4E-18  |
| MSM0024           | NONE                             |                                                               |          | NONE                                           |                                             |          |
| MSM0025           | Msp_0447                         | predicted acyl-CoA synthetase                                 | 3.7E-49  | MTH_657                                        | long-chain-fatty-acid-CoA ligase            | 8.7E-227 |
| MSM0026           | Msp_0265                         | conserved hypothetical protein                                | 2.0E-16  | MTH_659                                        | epoxidase                                   | 4.1E-62  |
| MSM0027           | Msp_0667                         | putative glutamate synthase, subunit 2 with ferredoxin domain | 7.9E-70  | NONE                                           | glutamate synthase (NADPH), alpha subunit   | 4.6E-79  |
| MSM0028           | Msp_0602                         | conserved hypothetical protein                                | 1.9E-13  | MTH_1876                                       | conserved protein                           | 1.7E-04  |
| MSM0029           | NONE                             |                                                               |          | NONE                                           |                                             |          |
| MSM0030           | Msp_0741                         | conserved hypothetical membrane-spanning protein              | 1.8E-72  | MTH_1812                                       | conserved protein                           | 1.6E-44  |
| MSM0031           | Msp_1465                         | member of asn/thr-rich large protein family                   | 2.9E-23  | MTH_716                                        | cell surface glycoprotein (s-layer protein) | 3.7E-04  |
| MSM0032           | NONE                             |                                                               |          | NONE                                           |                                             |          |
| MSM0033           | Msp_0966                         | putative 2-dehydropantoate 2-reductase                        | 6.8E-112 | NONE                                           |                                             |          |
| MSM0034           | Msp_0725                         | hypothetical protein                                          | 7.9E-06  | NONE                                           |                                             |          |
| MSM0035           | NONE                             |                                                               |          | NONE                                           |                                             |          |
| MSM0036           | NONE                             |                                                               |          | NONE                                           |                                             |          |
| MSM0037           | NONE                             |                                                               |          | NONE                                           |                                             |          |
| MSM0038           | NONE                             |                                                               |          | NONE                                           |                                             |          |
| MSM0039           | NONE                             |                                                               |          | NONE                                           |                                             |          |
| MSM0040           | Msp_1274                         | conserved hypothetical protein                                | 5.5E-05  | NONE                                           |                                             |          |
| MSM0041           | NONE                             |                                                               |          | NONE                                           |                                             |          |
| MSM0042           | NONE                             |                                                               |          | NONE                                           |                                             |          |
| MSM0043           | Msp_0737                         | putative peptide methionine sulfoxide reductase MsrA/MsrB     | 1.6E-32  | MTH_535                                        | peptide methionine sulfoxide reductase      | 5.3E-16  |
| MSM0044           | Msp_0510                         | putative aspartate aminotransferase                           | 2.0E-15  | MTH_1894                                       | aspartate aminotransferase homolog          | 3.9E-13  |

|         |          |                                                            |          |          |                                                 |          |
|---------|----------|------------------------------------------------------------|----------|----------|-------------------------------------------------|----------|
| MSM0045 | Msp_0283 | predicted ATPase                                           | 3.9E-93  | MTH_1176 | nucleotide-binding protein (putative ATPase)    | 1.4E-70  |
| MSP0046 | Msp_1460 | predicted NAD(FAD)-dependent dehydrogenase                 | 8.4E-114 | MTH_1354 | NADH oxidase                                    | 2.0E-149 |
| MSM0047 | NONE     |                                                            |          | NONE     |                                                 |          |
| MSM0048 | Msp_0701 | hypothetical protein                                       | 4.0E-20  | NONE     |                                                 |          |
| MSM0049 | Msp_0665 | F420H2:NADP oxidoreductase                                 | 3.1E-75  | MTH_248  | conserved protein                               | 9.4E-56  |
| MSM0050 | Msp_1172 | conserved hypothetical protein                             | 1.7E-21  | NONE     |                                                 |          |
| MSM0051 | Msp_1399 | member of asn/thr-rich large protein family                | 4.0E-33  | MTH_716  | cell surface glycoprotein (s-layer protein)     | 3.9E-11  |
| MSM0052 | Msp_0145 | member of asn/thr-rich large protein family                | 1.4E-53  | MTH_716  | cell surface glycoprotein (s-layer protein)     | 1.8E-11  |
| MSM0053 | Msp_0086 | putative tRNA nucleotidyltransferase                       | 5.0E-100 | MTH_584  | tRNA nucleotidyltransferase                     | 2.5E-110 |
| MSM0054 | Msp_0089 | predicted 2'-5' RNA ligase                                 | 7.2E-37  | MTH_583  | conserved protein                               | 9.1E-42  |
| MSM0055 | Msp_0090 | predicted 3-dehydroquinase synthase                        | 3.5E-108 | MTH_580  | conserved protein                               | 3.3E-124 |
| MSM0056 | Msp_0091 | predicted fructose-bisphosphate aldolase                   | 1.5E-100 | MTH_579  | conserved protein                               | 2.9E-100 |
| MSM0057 | Msp_0762 | member of asn/thr-rich large protein family                | 1.7E-13  | MTH_716  | cell surface glycoprotein (s-layer protein)     | 8.2E-07  |
| MSM0058 | Msp_0128 | predicted helicase                                         | 8.6E-23  | MTH_472  | DNA helicase II                                 | 1.2E-90  |
| MSM0059 | Msp_0092 | conserved hypothetical protein                             | 9.4E-35  | MTH_578  | unknown                                         | 2.1E-49  |
| MSM0060 | Msp_1187 | predicted archaeal kinase                                  | 8.2E-52  | MTH_577  | conserved protein                               | 2.1E-49  |
| MSM0061 | Msp_0757 | predicted ATPase                                           | 7.5E-97  | NONE     |                                                 |          |
| MSM0062 | Msp_0554 | hypothetical protein                                       | 2.2E-08  | MTH_847  | unknown                                         | 6.9E-08  |
| MSM0063 | Msp_1186 | predicted hydrolase                                        | 1.3E-67  | MTH_576  | conserved protein                               | 7.0E-51  |
| MSM0064 | Msp_0099 | conserved hypothetical protein                             | 4.6E-10  | MTH_812  | conserved protein                               | 1.5E-09  |
| MSM0065 | Msp_1185 | putative 5-amino-6-(5-phosphoribosylamino)uracil reductase | 2.6E-55  | MTH_235  | riboflavin-specific deaminase                   | 1.5E-66  |
| MSM0066 | Msp_0080 | predicted glycosyltransferase                              | 8.2E-107 | MTH_590  | N-acetylglucosamine-1-phosphate transferase     | 7.9E-107 |
| MSM0067 | NONE     |                                                            |          | NONE     |                                                 |          |
| MSM0068 | Msp_0407 | conserved hypothetical protein                             | 6.0E-04  | MTH_521  | unknown                                         | 8.4E-04  |
| MSM0069 | Msp_0081 | conserved hypothetical protein                             | 2.8E-26  | MTH_589  | conserved protein                               | 3.1E-25  |
| MSM0070 | Msp_0082 | conserved hypothetical protein                             | 2.8E-99  | MTH_588  | conserved protein                               | 4.8E-100 |
| MSM0071 | Msp_0083 | MetG                                                       | 5.3E-199 | MTH_587  | methionyl-tRNA synthetase                       | 2.9E-235 |
| MSM0072 | Msp_0216 | hypothetical membrane-spanning protein                     | 2.2E-04  | NONE     |                                                 |          |
| MSM0073 | Msp_0084 | DNA primase, large subunit                                 | 1.4E-102 | MTH_586  | unknown                                         | 1.7E-118 |
| MSM0074 | NONE     |                                                            |          | NONE     |                                                 |          |
| MSM0075 | Msp_0085 | DNA primase, small subunit                                 | 1.2E-96  | NONE     | DNA primase, small subunit                      | 8.1E-105 |
| MSM0076 | Msp_0710 | hypothetical protein                                       | 9.9E-04  | NONE     |                                                 |          |
| MSM0077 | Msp_0357 | putative thymidylate kinase                                | 6.9E-16  | MTH_1100 | conserved protein                               | 4.6E-47  |
| MSM0078 | NONE     |                                                            |          | MTH_1099 | conserved protein                               | 3.9E-50  |
| MSM0079 | Msp_0392 | CofH                                                       | 7.6E-81  | MTH_820  | conserved protein                               | 1.0E-106 |
| MSM0080 | Msp_0278 | ComD                                                       | 1.0E-53  | MTH_1206 | phosphonopyruvate decarboxylase related protein | 1.7E-47  |
| MSM0081 | Msp_0277 | ComE                                                       | 9.4E-51  | MTH_1207 | phosphonopyruvate decarboxylase related protein | 1.7E-40  |
| MSM0082 | Msp_0127 | HdrA2                                                      | 1.3E-241 | NONE     | heterodisulfide reductase, subunit A            | 2.5E-133 |
| MSM0083 | Msp_0126 | HdrB2                                                      | 2.6E-94  | NONE     | heterodisulfide reductase, subunit B            | 8.6E-46  |
| MSM0084 | Msp_0125 | HdrC2                                                      | 2.6E-48  | NONE     | heterodisulfide reductase, subunit C            | 3.5E-17  |
| MSM0085 | Msp_1261 | conserved hypothetical protein                             | 6.6E-114 | MTH_1684 | conserved protein (contains ferredoxin domain)  | 2.1E-115 |
| MSM0086 | Msp_1270 | ComA                                                       | 5.2E-73  | MTH_1674 | conserved protein                               | 3.5E-81  |
| MSM0087 | Msp_0233 | conserved hypothetical protein                             | 2.3E-22  | NONE     |                                                 |          |
| MSM0088 | Msp_1322 | conserved hypothetical protein                             | 7.3E-44  | MTH_727  | conserved protein                               | 1.6E-51  |
| MSM0089 | Msp_1314 | ProC                                                       | 8.2E-07  | NONE     |                                                 |          |
| MSM0090 | NONE     |                                                            |          | MTH_224  | conserved protein                               | 8.6E-30  |
| MSM0091 | Msp_0129 | putative 2,3-diphosphoglycerate synthase                   | 8.6E-144 | MTH_223  | unknown                                         | 2.0E-172 |
| MSM0092 | Msp_0154 | member of asn/thr-rich large protein family                | 5.6E-08  | NONE     |                                                 |          |
| MSM0093 | Msp_1068 | partially conserved hypothetical membrane-spanning protein | 1.1E-58  | MTH_1858 | phage infection protein homolog                 | 5.7E-98  |

|         |          |                                                  |          |          |                                                           |          |
|---------|----------|--------------------------------------------------|----------|----------|-----------------------------------------------------------|----------|
| MSM0094 | Msp_0971 | hypothetical protein                             | 4.4E-09  | MTH_1787 | conserved protein                                         | 9.3E-17  |
| MSM0095 | Msp_1181 | predicted phosphotransacetylase                  | 1.3E-44  | MTH_231  | conserved protein                                         | 8.8E-44  |
| MSM0096 | Msp_1182 | UppS                                             | 2.6E-96  | MTH_232  | conserved protein                                         | 2.3E-100 |
| MSM0097 | Msp_1183 | predicted DNase                                  | 3.2E-57  | MTH_233  | conserved protein                                         | 3.4E-67  |
| MSM0098 | NONE     |                                                  |          | NONE     |                                                           |          |
| MSM0099 | Msp_0079 | hypothetical membrane-spanning protein           | 2.1E-23  | MTH_596  | unknown                                                   | 8.2E-25  |
| MSM0100 | Msp_0078 | hypothetical membrane-spanning protein           | 7.3E-12  | MTH_429  | unknown                                                   | 1.1E-13  |
| MSM0101 | Msp_0988 | CbiF                                             | 9.8E-88  | MTH_602  | precorrin-3 methylase                                     | 1.5E-80  |
| MSM0102 | Msp_1236 | MetE                                             | 3.4E-69  | MTH_775  | cobalamin-independent methionine synthase                 | 3.8E-75  |
| MSM0103 | NONE     |                                                  |          | MTH_776  | conserved protein                                         | 7.3E-33  |
| MSM0104 | NONE     |                                                  |          | MTH_777  | conserved protein                                         | 2.7E-42  |
| MSM0105 | Msp_1234 | conserved hypothetical membrane-spanning protein | 3.8E-86  | MTH_778  | unknown                                                   | 5.9E-118 |
| MSM0106 | Msp_1232 | conserved hypothetical protein                   | 1.8E-109 | MTH_781  | conserved protein                                         | 2.3E-132 |
| MSM0107 | Msp_1231 | HypB                                             | 1.4E-79  | MTH_782  | hydrogenase expression/formation protein HypB             | 1.1E-84  |
| MSM0108 | Msp_1230 | HypA                                             | 5.8E-35  | MTH_783  | hydrogenase expression/formation protein HypA             | 4.8E-36  |
| MSM0109 | Msp_0987 | hypothetical membrane-spanning protein           | 8.6E-09  | NONE     |                                                           |          |
| MSM0110 | Msp_0017 | conserved hypothetical protein                   | 1.5E-22  | NONE     |                                                           |          |
| MSM0111 | NONE     |                                                  |          | NONE     |                                                           |          |
| MSM0112 | Msp_0367 | predicted helicase                               | 1.2E-208 | NONE     | ATP-dependent RNA helicase, eIF-4A family                 | 1.4E-235 |
| MSM0113 | Msp_0128 | predicted helicase                               | 9.9E-137 | MTH_472  | DNA helicase II                                           | 6.1E-26  |
| MSM0114 | NONE     |                                                  |          | NONE     |                                                           |          |
| MSM0115 | Msp_1290 | conserved hypothetical protein                   | 8.0E-29  | MTH_526  | conserved protein                                         | 2.1E-51  |
| MSM0116 | Msp_1289 | conserved hypothetical protein                   | 3.5E-51  | MTH_528  | unknown                                                   | 9.1E-42  |
| MSM0117 | Msp_1288 | conserved hypothetical membrane-spanning protein | 4.7E-56  | MTH_529  | unknown                                                   | 1.5E-66  |
| MSM0118 | Msp_1286 | conserved hypothetical protein                   | 1.1E-86  | MTH_532  | UDP-N-acetylmuramyl tripeptide synthetase related protein | 2.9E-86  |
| MSM0119 | Msp_0156 | predicted nuclease                               | 3.2E-18  | MTH_538  | unknown                                                   | 2.5E-14  |
| MSM0120 | Msp_1095 | DNA double-strand break repair protein Rad50     | 1.3E-92  | MTH_540  | intracellular protein transport protein                   | 2.1E-27  |
| MSM0121 | Msp_1094 | DNA double-strand break repair protein Mre11     | 3.7E-72  | MTH_541  | Rad32 related protein                                     | 1.2E-16  |
| MSM0122 | Msp_1093 | predicted ATPase                                 | 1.7E-122 | MTH_307  | conserved protein                                         | 4.2E-124 |
| MSM0123 | Msp_1092 | conserved hypothetical protein                   | 2.4E-29  | MTH_306  | conserved protein                                         | 1.2E-32  |
| MSM0124 | Msp_1291 | PcrB                                             | 5.1E-75  | MTH_552  | conserved protein                                         | 2.9E-84  |
| MSM0125 | Msp_1292 | 50S ribosomal protein L40e                       | 5.5E-23  | MTH_553  | ribosomal protein L40                                     | 7.6E-22  |
| MSM0126 | Msp_1293 | conserved hypothetical protein                   | 9.4E-51  | MTH_554  | conserved protein                                         | 2.9E-54  |
| MSM0127 | NONE     |                                                  |          | NONE     |                                                           |          |
| MSM0128 | Msp_0853 | conserved hypothetical membrane-spanning protein | 2.3E-10  | MTH_570  | unknown                                                   | 2.8E-31  |
| MSM0129 | Msp_0435 | nicotinamide-nucleotide adenyllyltransferase     | 8.1E-61  | MTH_150  | conserved protein                                         | 6.7E-62  |
| MSM0130 | NONE     |                                                  |          | MTH_149  | molybdenum cofactor biosynthesis protein MoaE             | 6.6E-39  |
| MSM0131 | NONE     |                                                  |          | MTH_920  | anion permease                                            | 1.5E-04  |
| MSM0132 | NONE     |                                                  |          | MTH_1797 | conserved protein                                         | 7.9E-20  |
| MSM0133 | Msp_1198 | predicted thioesterase                           | 2.2E-42  | MTH_658  | unknown                                                   | 4.8E-36  |
| MSM0134 | Msp_0565 | predicted M42 glutamyl aminopeptidase            | 2.2E-115 | NONE     | endo-1,4-beta-glucanase                                   | 3.7E-116 |
| MSM0135 | Msp_0668 | conserved hypothetical protein                   | 9.1E-85  | NONE     | coenzyme F420-reducing hydrogenase, beta subunit homolog  | 4.5E-88  |
| MSM0136 | Msp_0147 | ferredoxin                                       | 2.2E-06  | NONE     | tungsten formylmethanofuran dehydrogenase, subunit G      | 2.2E-06  |
| MSM0137 | Msp_0220 | predicted glycosyltransferase                    | 3.7E-12  | MTH_540  | intracellular protein transport protein                   | 4.7E-05  |
| MSM0138 | NONE     |                                                  |          | MTH_491  | conserved protein                                         | 2.6E-51  |
| MSM0139 | Msp_0448 | predicted polysaccharide biosynthesis protein    | 7.6E-04  | NONE     |                                                           |          |
| MSM0140 | Msp_0560 | conserved hypothetical protein                   | 4.0E-59  | MTH_435  | conserved protein                                         | 2.9E-68  |
| MSM0141 | Msp_0561 | predicted dephospho-CoA kinase                   | 5.5E-23  | MTH_434  | UMP/CMP kinase related protein                            | 5.6E-42  |
| MSM0142 | Msp_0563 | predicted ATPase of PP-loop superfamily          | 3.2E-66  | MTH_432  | conserved protein                                         | 2.9E-68  |

|         |          |                                                            |          |          |                                                   |          |
|---------|----------|------------------------------------------------------------|----------|----------|---------------------------------------------------|----------|
| MSM0143 | Msp_0564 | partially conserved hypothetical membrane-spanning protein | 1.3E-30  | MTH_431  | unknown                                           | 2.4E-34  |
| MSM0144 | NONE     |                                                            |          | NONE     |                                                   |          |
| MSM0145 | Msp_0451 | hypothetical membrane-spanning protein                     | 1.9E-13  | MTH_422  | unknown                                           | 1.6E-14  |
| MSM0146 | Msp_0452 | conserved hypothetical membrane-spanning protein           | 7.0E-18  | MTH_421  | unknown                                           | 2.0E-21  |
| MSM0147 | Msp_0453 | PyrG                                                       | 2.2E-202 | MTH_419  | CTP synthase                                      | 2.9E-212 |
| MSM0148 | Msp_0739 | predicted oxidoreductase                                   | 3.9E-93  | MTH_907  | conserved protein                                 | 3.1E-32  |
| MSM0149 | NONE     |                                                            |          | NONE     |                                                   |          |
| MSM0150 | NONE     |                                                            |          | NONE     |                                                   |          |
| MSM0151 | NONE     |                                                            |          | NONE     |                                                   |          |
| MSM0152 | Msp_1417 | predicted Na <sup>+</sup> -driven multidrug efflux pump    | 1.1E-28  | MTH_314  | conserved protein                                 | 4.7E-23  |
| MSM0153 | Msp_0485 | AppM1                                                      | 1.3E-110 | MTH_418  | phosphonopyruvate decarboxylase related protein   | 2.1E-106 |
| MSM0154 | Msp_0487 | putative homoserine dehydrogenase                          | 1.3E-101 | MTH_417  | homoserine dehydrogenase homolog                  | 6.1E-100 |
| MSM0155 | Msp_0488 | predicted allosteric regulator of homoserine dehydrogenase | 1.1E-29  | MTH_416  | conserved protein                                 | 7.8E-36  |
| MSM0156 | Msp_0489 | conserved hypothetical protein                             | 2.6E-23  | MTH_415  | conserved protein                                 | 3.3E-21  |
| MSM0157 | Msp_0484 | predicted type I restriction-modification system subunit   | 1.9E-09  | NONE     | type I restriction modification system, subunit S | 5.3E-09  |
| MSM0158 | Msp_0483 | hypothetical protein                                       | 2.3E-17  | NONE     | type I restriction modification system, subunit S | 2.2E-13  |
| MSM0159 | Msp_0777 | member of asn/thr-rich large protein family                | 2.1E-13  | NONE     |                                                   |          |
| MSM0160 | Msp_0490 | putative asparagine synthetase                             | 7.9E-102 | MTH_414  | asparagine synthetase                             | 2.3E-91  |
| MSM0161 | NONE     |                                                            |          | NONE     |                                                   |          |
| MSM0162 | NONE     |                                                            |          | NONE     |                                                   |          |
| MSM0163 | Msp_0425 | conserved hypothetical protein                             | 7.0E-23  | MTH_1083 | conserved protein                                 | 5.6E-26  |
| MSM0164 | Msp_0946 | conserved hypothetical protein                             | 1.3E-106 | MTH_1084 | conserved protein                                 | 4.6E-118 |
| MSM0165 | Msp_0945 | predicted RecB family exonuclease                          | 7.9E-54  | MTH_1085 | conserved protein                                 | 1.8E-45  |
| MSM0166 | Msp_0422 | predicted helicase                                         | 2.3E-27  | MTH_1086 | conserved protein                                 | 9.1E-32  |
| MSM0167 | NONE     |                                                            |          | MTH_1087 | unknown                                           | 8.4E-04  |
| MSM0168 | NONE     |                                                            |          | NONE     |                                                   |          |
| MSM0169 | Msp_0220 | predicted glycosyltransferase                              | 2.1E-04  | NONE     |                                                   |          |
| MSM0170 | Msp_0944 | conserved hypothetical protein                             | 1.4E-63  | MTH_1091 | conserved protein                                 | 3.4E-35  |
| MSM0171 | Msp_0835 | hypothetical membrane-spanning protein                     | 2.7E-43  | MTH_769  | unknown                                           | 1.7E-34  |
| MSM0172 | NONE     |                                                            |          | NONE     |                                                   |          |
| MSM0173 | Msp_0145 | member of asn/thr-rich large protein family                | 3.2E-34  | MTH_1074 | putative membrane protein                         | 5.5E-31  |
| MSM0174 | Msp_0677 | predicted O-acetylhomoserine sulfhydrylase                 | 1.9E-123 | NONE     |                                                   |          |
| MSM0175 | Msp_0676 | MetX                                                       | 2.3E-166 | MTH_1820 | homoserine O-acetyltransferase                    | 1.5E-21  |
| MSM0176 | NONE     |                                                            |          | NONE     |                                                   |          |
| MSM0177 | NONE     |                                                            |          | NONE     |                                                   |          |
| MSM0178 | Msp_1385 | conserved hypothetical protein                             | 1.5E-27  | NONE     |                                                   |          |
| MSM0179 | NONE     |                                                            |          | NONE     |                                                   |          |
| MSM0180 | NONE     |                                                            |          | MTH_698  | unknown                                           | 1.6E-04  |
| MSM0181 | Msp_1174 | 50S ribosomal protein L37e                                 | 9.6E-26  | MTH_648  | ribosomal protein L37                             | 2.8E-24  |
| MSM0182 | Msp_1175 | putative snRNP Sm-like protein                             | 1.5E-27  | MTH_649  | conserved protein                                 | 2.1E-33  |
| MSM0183 | Msp_1176 | predicted RNA-binding protein                              | 9.0E-46  | MTH_650  | conserved protein                                 | 8.6E-46  |
| MSM0184 | Msp_1177 | predicted creatinine amidohydrolase                        | 1.3E-51  | MTH_651  | conserved protein                                 | 1.6E-51  |
| MSM0185 | Msp_0547 | hypothetical membrane-spanning protein                     | 7.8E-08  | MTH_515  | unknown                                           | 4.3E-05  |
| MSM0186 | Msp_0345 | conserved hypothetical protein                             | 1.3E-14  | NONE     |                                                   |          |
| MSM0187 | Msp_0444 | rubredoxin                                                 | 2.5E-09  | MTH_156  | rubredoxin                                        | 2.3E-13  |
| MSM0188 | Msp_0444 | rubredoxin                                                 | 3.4E-14  | MTH_156  | rubredoxin                                        | 3.5E-17  |
| MSM0189 | Msp_1301 | predicted nucleoside-diphosphate-sugar pyrophosphorylase   | 4.6E-08  | MTH_272  | acetyl / acyl transferase related protein         | 1.3E-58  |
| MSM0190 | Msp_0617 | predicted ATPase                                           | 3.1E-84  | MTH_271  | conserved protein                                 | 1.8E-75  |

|         |          |                                                                              |          |          |                                                    |          |
|---------|----------|------------------------------------------------------------------------------|----------|----------|----------------------------------------------------|----------|
| MSM0191 | Msp_1533 | RpoM1                                                                        | 1.5E-04  | NONE     |                                                    |          |
| MSM0192 | Msp_0618 | ArgH                                                                         | 2.7E-147 | MTH_269  | argininosuccinate lyase                            | 8.2E-160 |
| MSM0193 | Msp_0620 | 30S ribosomal protein S27Ae                                                  | 1.8E-17  | MTH_268  | ribosomal protein S27a                             | 8.1E-18  |
| MSM0194 | Msp_0621 | 30S ribosomal protein S24e                                                   | 1.1E-26  | MTH_267  | ribosomal protein S24                              | 1.6E-28  |
| MSM0195 | Msp_0622 | conserved hypothetical protein                                               | 4.8E-31  | MTH_266  | conserved protein                                  | 1.3E-33  |
| MSM0196 | Msp_0623 | RpoE2                                                                        | 9.0E-14  | NONE     | DNA-dependent RNA polymerase, subunit E''          | 1.5E-18  |
| MSM0197 | Msp_0624 | RpoE1                                                                        | 2.2E-65  | NONE     | DNA-dependent RNA polymerase, subunit E'           | 1.3E-67  |
| MSM0198 | Msp_0625 | inorganic pyrophosphatase                                                    | 3.1E-68  | MTH_263  | inorganic pyrophosphatase                          | 7.2E-65  |
| MSM0199 | Msp_0626 | conserved hypothetical protein                                               | 2.4E-22  | MTH_262  | conserved protein                                  | 3.7E-29  |
| MSM0200 | Msp_0627 | putative translation initiation factor 2, subunit gamma (aIF-2-gamma)(eIF2G) | 3.3E-158 | NONE     | translation initiation factor eIF-2, gamma subunit | 1.6E-163 |
| MSM0201 | Msp_0628 | 30S ribosomal protein S6e                                                    | 9.9E-40  | MTH_260  | ribosomal protein S6                               | 1.5E-41  |
| MSM0202 | Msp_0629 | InfB                                                                         | 9.3E-202 | MTH_259  | translation initiation factor IF2 homolog          | 2.6E-218 |
| MSM0203 | Msp_0630 | nucleoside diphosphate kinase                                                | 1.8E-56  | MTH_258  | nucleoside diphosphate kinase                      | 1.9E-57  |
| MSM0204 | Msp_0631 | 50S ribosomal protein L24e                                                   | 3.0E-22  | MTH_257  | ribosomal protein L24                              | 8.2E-25  |
| MSM0205 | Msp_0632 | 30S ribosomal protein S28e                                                   | 4.3E-30  | MTH_256  | ribosomal protein S28                              | 2.2E-31  |
| MSM0206 | Msp_0633 | 50S ribosomal protein L7Ae                                                   | 9.3E-44  | MTH_255  | ribosomal protein L7a                              | 1.3E-44  |
| MSM0207 | NONE     |                                                                              |          | MTH_1178 | conserved protein                                  | 1.9E-41  |
| MSM0208 | NONE     |                                                                              |          | MTH_1178 | conserved protein                                  | 3.9E-08  |
| MSM0209 | Msp_0861 | ferredoxin                                                                   | 7.3E-12  | MTH_1106 | ferredoxin                                         | 7.6E-22  |
| MSM0210 | Msp_0253 | conserved hypothetical membrane-spanning protein                             | 1.1E-04  | NONE     |                                                    |          |
| MSM0211 | NONE     |                                                                              |          | NONE     |                                                    |          |
| MSM0212 | NONE     |                                                                              |          | NONE     |                                                    |          |
| MSM0213 | Msp_0769 | archaeal histone                                                             | 8.2E-20  | MTH_821  | histone HMtA1                                      | 3.7E-22  |
| MSM0214 | Msp_0588 | ThrC                                                                         | 2.0E-153 | MTH_253  | threonine synthase                                 | 8.8E-163 |
| MSM0215 | Msp_0232 | hypothetical membrane-spanning protein                                       | 2.4E-22  | MTH_252  | conserved protein                                  | 4.5E-24  |
| MSM0216 | Msp_0653 | TrpS                                                                         | 5.0E-132 | MTH_251  | tryptophanyl-tRNA synthetase                       | 1.8E-116 |
| MSM0217 | Msp_0652 | EndA                                                                         | 5.0E-45  | MTH_250  | tRNA intron endonuclease                           | 2.7E-49  |
| MSM0218 | Msp_0446 | predicted metal-dependent transcriptional regulator                          | 5.3E-57  | MTH_214  | iron repressor                                     | 6.4E-57  |
| MSM0219 | Msp_1129 | partially conserved hypothetical membrane-spanning protein                   | 1.0E-46  | MTH_357  | conserved protein                                  | 4.0E-67  |
| MSM0220 | Msp_0114 | ThsB                                                                         | 1.7E-170 | MTH_218  | chaperonin                                         | 4.0E-183 |
| MSM0221 | Msp_0590 | member of asn/thr-rich large protein family                                  | 6.9E-13  | MTH_719  | cell surface glycoprotein (s-layer protein)        | 4.2E-05  |
| MSM0222 | Msp_0787 | FprA                                                                         | 2.5E-128 | MTH_220  | flavoprotein A homolog (II)                        | 3.2E-133 |
| MSM0223 | NONE     |                                                                              |          | MTH_557  | unknown                                            | 1.4E-22  |
| MSM0224 | NONE     |                                                                              |          | MTH_558  | unknown                                            | 2.1E-28  |
| MSM0225 | Msp_1294 | conserved hypothetical membrane-spanning protein                             | 1.4E-47  | MTH_559  | conserved protein                                  | 1.4E-54  |
| MSM0226 | NONE     |                                                                              |          | NONE     |                                                    |          |
| MSM0227 | Msp_0584 | HmgA                                                                         | 2.2E-138 | MTH_562  | 3-hydroxy-3-methylglutaryl CoA reductase           | 1.7E-143 |
| MSM0228 | Msp_0583 | SucD                                                                         | 1.7E-99  | NONE     | succinyl-CoA synthetase, alpha subunit             | 1.3E-111 |
| MSM0229 | Msp_0582 | conserved hypothetical protein                                               | 1.6E-69  | MTH_564  | conserved protein                                  | 1.5E-87  |
| MSM0230 | Msp_0233 | conserved hypothetical protein                                               | 2.9E-21  | NONE     |                                                    |          |
| MSM0231 | Msp_0577 | AroD                                                                         | 9.9E-40  | MTH_566  | 3-dehydroquinate dehydratase                       | 2.9E-52  |
| MSM0232 | Msp_0145 | member of asn/thr-rich large protein family                                  | 3.8E-05  | MTH_567  | unknown                                            | 7.5E-31  |
| MSM0233 | Msp_0664 | nitrogen regulatory protein P-II                                             | 7.9E-31  | MTH_664  | nitrogen regulatory protein P-II                   | 1.4E-36  |
| MSM0234 | Msp_0663 | ammonium transporter                                                         | 4.8E-150 | MTH_663  | ammonium transporter                               | 1.2E-142 |
| MSM0235 | Msp_0119 | hypothetical membrane-spanning protein                                       | 6.0E-04  | MTH_181  | unknown                                            | 1.4E-04  |
| MSM0236 | Msp_0434 | predicted phosphohydrolase                                                   | 1.2E-100 | MTH_148  | conserved protein                                  | 7.8E-123 |
| MSM0237 | Msp_0088 | predicted 3-polyprenyl-4-hydroxybenzoate decarboxylase                       | 3.1E-59  | MTH_147  | phenylacrylic acid decarboxylase                   | 2.6E-53  |
| MSM0238 | Msp_0087 | CbiT                                                                         | 4.2E-48  | MTH_146  | precorrin-8W decarboxylase                         | 3.1E-48  |
| MSM0239 | NONE     |                                                                              |          | MTH_145  | conserved protein                                  | 6.9E-44  |

|         |          |                                                         |          |          |                                                                      |          |
|---------|----------|---------------------------------------------------------|----------|----------|----------------------------------------------------------------------|----------|
| MSM0240 | Msp_1289 | conserved hypothetical protein                          | 8.3E-07  | MTH_143  | molybdopterin-guanine dinucleotide biosynthesis MobA related protein | 1.6E-30  |
| MSM0241 | Msp_1252 | putative exosome complex, exonuclease 2 subunit         | 1.1E-61  | MTH_682  | conserved protein                                                    | 5.6E-90  |
| MSM0242 | Msp_1251 | putative exosome complex, exonuclease 1 subunit         | 1.4E-79  | MTH_683  | ribonuclease PH                                                      | 1.1E-93  |
| MSM0243 | Msp_1250 | putative exosome complex, RNA-binding subunit           | 1.6E-48  | MTH_684  | conserved protein                                                    | 2.1E-90  |
| MSM0244 | Msp_1249 | conserved hypothetical protein                          | 1.8E-70  | MTH_685  | conserved protein                                                    | 8.3E-80  |
| MSM0245 | Msp_1248 | PsmA                                                    | 6.3E-77  | NONE     | proteasome, alpha subunit                                            | 2.5E-94  |
| MSM0246 | Msp_1246 | putative ribonuclease P, component 2                    | 1.3E-19  | MTH_687  | conserved protein                                                    | 2.3E-22  |
| MSM0247 | Msp_1245 | putative ribonuclease P, component 3                    | 2.1E-28  | MTH_688  | conserved protein                                                    | 3.1E-41  |
| MSM0248 | Msp_0950 | hypothetical protein                                    | 7.2E-05  | NONE     |                                                                      |          |
| MSM0249 | Msp_1548 | hypothetical protein                                    | 1.8E-04  | MTH_301  | unknown                                                              | 4.1E-23  |
| MSM0250 | Msp_0501 | hypothetical membrane-spanning protein                  | 1.0E-05  | MTH_521  | unknown                                                              | 3.6E-10  |
| MSM0251 | Msp_0725 | hypothetical protein                                    | 1.5E-04  | NONE     |                                                                      |          |
| MSM0252 | Msp_0824 | predicted Na <sup>+</sup> -driven multidrug efflux pump | 1.6E-96  | MTH_314  | conserved protein                                                    | 3.7E-93  |
| MSM0253 | NONE     |                                                         |          | MTH_1725 | unknown                                                              | 1.4E-15  |
| MSM0254 | NONE     |                                                         |          | NONE     |                                                                      |          |
| MSM0255 | NONE     |                                                         |          | NONE     |                                                                      |          |
| MSM0256 | Msp_0017 | conserved hypothetical protein                          | 1.7E-28  | NONE     |                                                                      |          |
| MSM0257 | Msp_0975 | hypothetical membrane-spanning protein                  | 4.3E-30  | NONE     |                                                                      |          |
| MSM0258 | Msp_0724 | hypothetical membrane-spanning protein                  | 1.6E-04  | NONE     |                                                                      |          |
| MSM0259 | Msp_1548 | hypothetical protein                                    | 1.1E-05  | MTH_521  | unknown                                                              | 6.8E-04  |
| MSM0260 | Msp_0507 | predicted archaea-specific RecJ-like exonuclease        | 2.0E-199 | MTH_763  | conserved protein                                                    | 3.4E-225 |
| MSM0261 | Msp_1384 | conserved hypothetical membrane-spanning protein        | 1.1E-04  | MTH_759  | unknown                                                              | 1.5E-16  |
| MSM0262 | Msp_0788 | desulfoferrodoxin                                       | 1.4E-26  | MTH_757  | rubredoxin oxidoreductase                                            | 3.4E-26  |
| MSM0263 | Msp_1003 | predicted NifU protein                                  | 1.1E-47  | NONE     |                                                                      |          |
| MSM0264 | Msp_1002 | IscS                                                    | 6.6E-121 | MTH_1389 | nifS protein                                                         | 1.6E-30  |
| MSM0265 | Msp_0677 | predicted O-acetylhomoserine sulfhydrylase              | 1.5E-148 | MTH_1188 | pleiotropic regulatory protein DegT                                  | 3.1E-04  |
| MSM0266 | Msp_0145 | member of asn/thr-rich large protein family             | 2.7E-50  | MTH_911  | probable surface protein                                             | 6.2E-09  |
| MSM0267 | Msp_0844 | predicted multimeric flavodoxin                         | 4.4E-53  | MTH_135  | conserved protein                                                    | 2.7E-17  |
| MSM0268 | Msp_0124 | CysS                                                    | 1.2E-139 | MTH_587  | methionyl-tRNA synthetase                                            | 9.6E-08  |
| MSM0269 | Msp_0527 | conserved hypothetical protein                          | 8.0E-38  | NONE     |                                                                      |          |
| MSM0270 | Msp_0450 | predicted serine acetyltransferase                      | 8.1E-61  | MTH_1588 | ferripyochelin binding protein                                       | 2.0E-06  |
| MSM0271 | Msp_0449 | cysteine synthase                                       | 2.2E-97  | NONE     | tryptophan synthase, beta subunit                                    | 3.1E-08  |
| MSM0272 | Msp_0497 | putative endonuclease III                               | 2.2E-67  | MTH_764  | endonuclease III                                                     | 1.1E-70  |
| MSM0273 | Msp_0498 | AroA                                                    | 1.1E-102 | MTH_766  | 5-enolpyruvylshikimate 3-phosphate synthase                          | 2.5E-62  |
| MSM0274 | NONE     |                                                         |          | NONE     |                                                                      |          |
| MSM0275 | Msp_0499 | ValS                                                    | 2.4E-235 | MTH_767  | valyl-tRNA synthetase                                                | 0.0E+00  |
| MSM0276 | Msp_0526 | hypothetical membrane-spanning protein                  | 8.1E-29  | MTH_768  | unknown                                                              | 2.9E-22  |
| MSM0277 | Msp_0525 | PheT                                                    | 3.3E-151 | MTH_770  | phenylalanyl-tRNA synthetase                                         | 4.2E-172 |
| MSM0278 | NONE     |                                                         |          | NONE     |                                                                      |          |
| MSM0279 | Msp_0522 | conserved hypothetical protein                          | 4.0E-36  | MTH_771  | conserved protein                                                    | 2.7E-35  |
| MSM0280 | Msp_0757 | predicted ATPase                                        | 4.4E-13  | NONE     |                                                                      |          |
| MSM0281 | Msp_0145 | member of asn/thr-rich large protein family             | 2.1E-09  | MTH_911  | probable surface protein                                             | 2.9E-10  |
| MSM0282 | Msp_0141 | member of asn/thr-rich large protein family             | 1.3E-23  | MTH_911  | probable surface protein                                             | 1.1E-17  |
| MSM0283 | NONE     |                                                         |          | MTH_436  | unknown                                                              | 1.1E-04  |
| MSM0284 | Msp_0995 | RpiA                                                    | 5.8E-74  | MTH_608  | ribose 5-phosphate isomerase                                         | 1.3E-74  |
| MSM0285 | Msp_0996 | conserved hypothetical protein                          | 1.3E-28  | MTH_609  | conserved protein                                                    | 1.3E-35  |
| MSM0286 | Msp_0997 | EgsA                                                    | 7.9E-102 | MTH_610  | glycerol 1-phosphate dehydrogenase                                   | 1.5E-112 |
| MSM0287 | Msp_1004 | ProS                                                    | 8.6E-160 | MTH_611  | prolyl-tRNA synthetase                                               | 1.4E-155 |
| MSM0288 | Msp_1006 | conserved hypothetical protein                          | 1.7E-53  | MTH_613  | conserved protein                                                    | 4.2E-60  |
| MSM0289 | Msp_1007 | ThiD                                                    | 3.6E-58  | MTH_614  | transcriptional regulator                                            | 5.1E-64  |

|         |          |                                                                                           |          |          |                                                                 |          |
|---------|----------|-------------------------------------------------------------------------------------------|----------|----------|-----------------------------------------------------------------|----------|
| MSM0290 | Msp_1000 | predicted ABC-type nitrate/sulfonate/bicarbonate transport system, ATB-binding protein    | 2.6E-71  | MTH_920  | anion permease                                                  | 1.4E-31  |
| MSM0291 | Msp_1001 | predicted ABC-type nitrate/sulfonate/bicarbonate transport system, permease protein       | 1.9E-84  | MTH_1730 | phosphate transporter permease PstC homolog                     | 4.8E-07  |
| MSM0292 | NONE     |                                                                                           |          | NONE     |                                                                 |          |
| MSM0293 | Msp_0826 | predicted cation transport ATPase                                                         | 1.8E-198 | MTH_1535 | heavy-metal transporting CPx-type ATPase                        | 1.2E-69  |
| MSM0294 | Msp_0825 | hypothetical protein                                                                      | 4.2E-09  | NONE     |                                                                 |          |
| MSM0295 | NONE     |                                                                                           |          | NONE     | nitrate assimilation protein, narQ                              | 7.1E-49  |
| MSM0296 | NONE     |                                                                                           |          | MTH_691  | conserved protein                                               | 1.2E-30  |
| MSM0297 | Msp_1244 | predicted exosome subunit                                                                 | 1.1E-24  | MTH_689  | conserved protein                                               | 2.7E-26  |
| MSM0298 | Msp_1243 | 50S ribosomal protein L15e                                                                | 2.1E-76  | MTH_690  | ribosomal protein L15                                           | 1.3E-67  |
| MSM0299 | NONE     |                                                                                           |          | NONE     |                                                                 |          |
| MSM0300 | Msp_0851 | predicted ABC-type dipeptide/oligopeptide/nickel transport system, solute-binding protein | 1.5E-139 | NONE     |                                                                 |          |
| MSM0301 | Msp_0811 | ABC-type dipeptide transport system, permease protein                                     | 2.3E-120 | NONE     |                                                                 |          |
| MSM0302 | Msp_0810 | ABC-type dipeptide transport system, permease protein                                     | 1.7E-99  | MTH_1729 | phosphate transporter permease PstC                             | 2.3E-05  |
| MSM0303 | Msp_0848 | predicted ABC-type dipeptide/oligopeptide/nickel transport system, ATP-binding protein    | 3.4E-101 | MTH_696  | ABC transporter (glutamine transport ATP-binding protein)       | 1.4E-20  |
| MSM0304 | Msp_0847 | predicted ABC-type dipeptide/oligopeptide/nickel transport system, ATP-binding protein    | 4.8E-63  | NONE     | methyl coenzyme M reductase system, component A2                | 7.3E-21  |
| MSM0305 | Msp_0431 | GuaB                                                                                      | 6.1E-10  | MTH_406  | conserved protein                                               | 7.6E-70  |
| MSM0306 | Msp_1447 | EhbK                                                                                      | 3.0E-18  | MTH_405  | polyferredoxin                                                  | 1.6E-37  |
| MSM0307 | Msp_0071 | predicted ribokinase                                                                      | 3.4E-62  | MTH_404  | ribokinase                                                      | 3.5E-65  |
| MSM0308 | Msp_0070 | formylmethanofuran-tetrahydromethanopterin formyltransferase                              | 6.7E-89  | MTH_403  | formylmethanofuran:tetrahydromethanopterin formyltransferase II | 1.7E-95  |
| MSM0309 | Msp_0069 | conserved hypothetical membrane-spanning protein                                          | 2.4E-68  | MTH_402  | unknown                                                         | 3.9E-57  |
| MSM0310 | Msp_1447 | EhbK                                                                                      | 1.7E-23  | MTH_401  | polyferredoxin                                                  | 7.7E-77  |
| MSM0311 | Msp_1447 | EhbK                                                                                      | 2.1E-13  | MTH_399  | polyferredoxin                                                  | 7.4E-111 |
| MSM0312 | Msp_1444 | EhbN                                                                                      | 2.2E-51  | NONE     | formate hydrogenlyase, subunit 5                                | 7.8E-139 |
| MSM0313 | Msp_1445 | EhbM                                                                                      | 5.4E-32  | NONE     | formate hydrogenlyase, subunit 7                                | 6.3E-66  |
| MSM0314 | NONE     |                                                                                           |          | MTH_396  | conserved protein                                               | 2.9E-29  |
| MSM0315 | NONE     |                                                                                           |          | MTH_395  | conserved protein                                               | 1.9E-18  |
| MSM0316 | Msp_0616 | partially conserved hypothetical membrane-spanning protein                                | 9.5E-04  | MTH_394  | unknown                                                         | 5.8E-08  |
| MSM0317 | Msp_1443 | EhbO                                                                                      | 1.1E-16  | NONE     | NADH dehydrogenase (ubiquinone), subunit 1 related protein      | 1.9E-105 |
| MSM0318 | NONE     |                                                                                           |          | MTH_392  | unknown                                                         | 1.4E-15  |
| MSM0319 | Msp_1452 | EhbF                                                                                      | 4.0E-06  | NONE     | NADH dehydrogenase I, subunit N related protein                 | 5.5E-83  |
| MSM0320 | NONE     |                                                                                           |          | MTH_390  | conserved protein                                               | 7.0E-67  |
| MSM0321 | NONE     |                                                                                           |          | MTH_389  | conserved protein                                               | 6.6E-55  |
| MSM0322 | NONE     |                                                                                           |          | MTH_388  | unknown                                                         | 1.5E-25  |
| MSM0323 | NONE     |                                                                                           |          | MTH_387  | conserved protein                                               | 3.9E-18  |
| MSM0324 | NONE     |                                                                                           |          | MTH_386  | unknown                                                         | 6.4E-18  |
| MSM0325 | NONE     |                                                                                           |          | MTH_385  | conserved protein                                               | 4.1E-55  |
| MSM0326 | NONE     |                                                                                           |          | MTH_384  | unknown                                                         | 3.5E-17  |
| MSM0327 | Msp_0067 | putative UDP-glucose 4-epimerase                                                          | 1.2E-73  | MTH_380  | UDP-glucose 4-epimerase homolog                                 | 1.7E-86  |
| MSM0328 | NONE     |                                                                                           |          | MTH_698  | unknown                                                         | 2.7E-10  |
| MSM0329 | Msp_0265 | conserved hypothetical protein                                                            | 7.4E-51  | MTH_700  | conserved protein                                               | 5.1E-64  |
| MSM0330 | Msp_0266 | predicted acyl-CoA synthetase                                                             | 1.1E-184 | MTH_701  | acetyl-CoA synthetase related protein                           | 1.0E-138 |
| MSM0331 | Msp_1390 | KorD                                                                                      | 7.0E-07  | NONE     | 2-oxoisovalerate oxidoreductase, gamma subunit                  | 7.9E-20  |
| MSM0332 | Msp_1389 | KorA                                                                                      | 1.6E-56  | NONE     | 2-oxoisovalerate oxidoreductase, beta subunit                   | 6.4E-144 |

|         |          |                                                                                               |          |         |                                                              |          |
|---------|----------|-----------------------------------------------------------------------------------------------|----------|---------|--------------------------------------------------------------|----------|
| MSM0333 | Msp_1388 | KorB                                                                                          | 2.0E-28  | NONE    | 2-oxoisovalerate oxidoreductase, alpha subunit               | 8.0E-169 |
| MSM0334 | Msp_1411 | GatD                                                                                          | 9.1E-140 | MTH_706 | L-asparaginase I                                             | 6.4E-144 |
| MSM0335 | Msp_1412 | GatE                                                                                          | 8.1E-187 | MTH_707 | PET112-like protein                                          | 7.1E-209 |
| MSM0336 | NONE     |                                                                                               |          | NONE    |                                                              |          |
| MSM0337 | Msp_0145 | member of asn/thr-rich large protein family                                                   | 1.1E-08  | NONE    |                                                              |          |
| MSM0338 | NONE     |                                                                                               |          | NONE    |                                                              |          |
| MSM0339 | NONE     |                                                                                               |          | NONE    |                                                              |          |
| MSM0340 | Msp_1413 | predicted thioredoxin reductase                                                               | 1.4E-70  | MTH_708 | thioredoxin reductase                                        | 6.9E-92  |
| MSM0341 | NONE     |                                                                                               |          | NONE    |                                                              |          |
| MSM0342 | Msp_0017 | conserved hypothetical protein                                                                | 1.7E-28  | NONE    |                                                              |          |
| MSM0343 | Msp_1311 | GMP synthase [glutamine hydrolyzing], subunit A                                               | 4.2E-64  | NONE    | GMP synthetase, subunit A                                    | 1.1E-68  |
| MSM0344 | NONE     |                                                                                               |          | NONE    |                                                              |          |
| MSM0345 | Msp_1312 | GMP synthase [glutamine hydrolyzing], subunit B                                               | 3.4E-117 | NONE    | GMP synthetase, subunit B                                    | 7.1E-122 |
| MSM0346 | Msp_1315 | conserved hypothetical protein                                                                | 8.0E-125 | MTH_720 | unknown                                                      | 3.1E-128 |
| MSM0347 | Msp_1316 | conserved hypothetical protein                                                                | 6.5E-43  | MTH_721 | conserved protein                                            | 8.6E-62  |
| MSM0348 | Msp_1317 | conserved hypothetical protein                                                                | 7.1E-14  | MTH_722 | conserved protein                                            | 2.3E-22  |
| MSM0349 | Msp_1317 | conserved hypothetical protein                                                                | 1.5E-05  | MTH_722 | conserved protein                                            | 1.2E-04  |
| MSM0350 | Msp_1318 | predicted isopropylmalate/homocitrate/citramalate synthase                                    | 3.9E-155 | MTH_723 | 2-isopropylmalate synthase                                   | 6.2E-162 |
| MSM0351 | NONE     |                                                                                               |          | NONE    |                                                              |          |
| MSM0352 | Msp_1319 | predicted DNA modification methylase                                                          | 1.4E-72  | MTH_724 | methyltransferase related protein                            | 4.3E-83  |
| MSM0353 | Msp_1321 | hypothetical membrane-spanning protein                                                        | 4.8E-11  | NONE    |                                                              |          |
| MSM0354 | Msp_1206 | proteasome-activating nucleotidase                                                            | 4.1E-144 | MTH_728 | ATP-dependent 26S protease regulatory subunit 4              | 1.2E-172 |
| MSM0355 | Msp_1207 | predicted transcriptional regulator                                                           | 7.4E-35  | MTH_729 | conserved protein                                            | 2.7E-33  |
| MSM0356 | Msp_1208 | conserved hypothetical protein                                                                | 2.3E-24  | MTH_730 | conserved protein                                            | 6.2E-27  |
| MSM0357 | Msp_1209 | conserved hypothetical membrane-spanning protein                                              | 1.6E-128 | MTH_731 | unknown                                                      | 1.5E-110 |
| MSM0358 | Msp_1210 | conserved hypothetical membrane-spanning protein                                              | 7.3E-44  | MTH_733 | unknown                                                      | 3.7E-45  |
| MSM0359 | Msp_1213 | predicted UDP-N-acetylmuramyl tripeptide synthase                                             | 1.7E-108 | MTH_530 | UDP-N-acetylmuramyl tripeptide synthetase related protein    | 5.2E-14  |
| MSM0360 | Msp_1214 | predicted UDP-N-acetylmuramyl pentapeptide phosphotransferase                                 | 1.9E-91  | MTH_735 | phospho-N-acetylmuramoyl-pentapeptide- transferase           | 2.8E-102 |
| MSM0361 | Msp_1215 | partially conserved hypothetical protein, predicted carbamoyl-phosphate synthase, large chain | 6.8E-96  | MTH_736 | conserved protein                                            | 2.0E-76  |
| MSM0362 | Msp_1216 | partially conserved hypothetical protein                                                      | 5.4E-16  | NONE    | coenzyme F420-reducing hydrogenase, delta subunit homolog    | 5.3E-30  |
| MSM0363 | Msp_1217 | predicted RNA methylase                                                                       | 3.2E-50  | MTH_738 | conserved protein                                            | 1.0E-56  |
| MSM0364 | Msp_1218 | putative nickel responsive regulator                                                          | 3.0E-54  | MTH_739 | conserved protein                                            | 9.1E-58  |
| MSM0365 | Msp_1090 | hypothetical protein                                                                          | 2.1E-23  | MTH_741 | unknown                                                      | 1.8E-22  |
| MSM0366 | NONE     |                                                                                               |          | NONE    |                                                              |          |
| MSM0367 | Msp_0099 | conserved hypothetical protein                                                                | 6.0E-17  | MTH_812 | conserved protein                                            | 5.6E-26  |
| MSM0368 | Msp_0667 | putative glutamate synthase, subunit 2 with ferredoxin domain                                 | 1.3E-193 | NONE    | glutamate synthase (NADPH), alpha subunit                    | 1.3E-216 |
| MSM0369 | Msp_0669 | putative glutamate synthase, subunit 3                                                        | 1.2E-68  | NONE    | tungsten formylmethanofuran dehydrogenase, subunit C homolog | 1.1E-82  |
| MSM0370 | Msp_0670 | putative glutamate synthase, subunit 1                                                        | 5.7E-115 | MTH_191 | glutamine PRPP amidotransferase                              | 2.2E-127 |
| MSM0371 | Msp_0671 | predicted glutamine amidotransferase                                                          | 6.2E-54  | MTH_190 | conserved protein                                            | 3.3E-60  |
| MSM0372 | Msp_0673 | partially conserved hypothetical protein                                                      | 1.3E-23  | MTH_187 | conserved protein                                            | 2.8E-24  |
| MSM0373 | Msp_1484 | LeuB                                                                                          | 3.3E-96  | MTH_184 | isocitrate dehydrogenase                                     | 4.5E-104 |
| MSM0374 | Msp_0447 | predicted acyl-CoA synthetase                                                                 | 8.3E-178 | MTH_657 | long-chain-fatty-acid-CoA ligase                             | 5.0E-58  |
| MSM0375 | Msp_0550 | ArgB                                                                                          | 2.3E-111 | MTH_183 | acetylglutamate kinase                                       | 2.5E-110 |
| MSM0376 | Msp_0967 | putative NADP-dependent alcohol dehydrogenase                                                 | 6.2E-06  | NONE    |                                                              |          |



|         |          |                                                                               |          |          |                                                         |          |
|---------|----------|-------------------------------------------------------------------------------|----------|----------|---------------------------------------------------------|----------|
| MSM0377 | Msp_0310 | predicted GTP:adenosylcobinamide-phosphate quanylyltransferase                | 4.9E-07  | MTH_1152 | conserved protein                                       | 6.5E-05  |
| MSM0378 | NONE     |                                                                               |          | MTH 1876 | conserved protein                                       | 1.3E-24  |
| MSM0379 | Msp_0549 | ArgJ                                                                          | 6.5E-107 | MTH 182  | glutamate N-acetyltransferase                           | 1.9E-103 |
| MSM0380 | Msp_0506 | hypothetical membrane-spanning protein                                        | 2.1E-05  | MTH 181  | unknown                                                 | 1.8E-04  |
| MSM0381 | Msp_0546 | conserved hypothetical membrane-spanning protein                              | 2.8E-99  | MTH 180  | unknown                                                 | 1.4E-114 |
| MSM0382 | Msp_0545 | conserved hypothetical protein                                                | 3.7E-95  | MTH 179  | unknown                                                 | 1.9E-103 |
| MSM0383 | Msp_0544 | predicted phosphohydrolase                                                    | 1.0E-62  | MTH 178  | lcc related protein                                     | 2.6E-53  |
| MSM0384 | Msp_0543 | conserved hypothetical protein                                                | 4.1E-34  | MTH 177  | conserved protein                                       | 1.9E-34  |
| MSM0385 | Msp_0511 | predicted Fe-S oxidoreductase                                                 | 3.2E-07  | MTH 1784 | Mg-protoporphyrin IX monomethyl ester oxidative cyclase | 9.9E-84  |
| MSM0386 | Msp_0148 | predicted sodium:solute symporter                                             | 1.9E-178 | MTH 1856 | sodium/proline symporter (proline permease)             | 1.5E-181 |
| MSM0387 | Msp_1040 | coenzyme F390 synthetase II                                                   | 2.2E-145 | MTH 1855 | coenzyme F390 synthetase II                             | 1.4E-162 |
| MSM0388 | Msp_1041 | predicted regulatory protein                                                  | 4.1E-34  | MTH 1854 | unknown                                                 | 2.6E-37  |
| MSM0389 | Msp_0136 | hypothetical protein                                                          | 1.5E-06  | NONE     |                                                         |          |
| MSM0390 | NONE     |                                                                               |          | NONE     |                                                         |          |
| MSM0391 | Msp_1042 | IorB                                                                          | 5.6E-53  | NONE     | indolepyruvate oxidoreductase, beta subunit             | 2.4E-50  |
| MSM0392 | Msp_1043 | IorA                                                                          | 6.7E-185 | NONE     | indolepyruvate oxidoreductase, alpha subunit            | 4.1E-192 |
| MSM0393 | Msp_1044 | TfrB                                                                          | 3.3E-135 | MTH 1850 | fumarate reductase                                      | 1.4E-155 |
| MSM0394 | Msp_1047 | predicted rRNA methylase                                                      | 2.2E-65  | MTH 1849 | conserved protein                                       | 1.2E-69  |
| MSM0395 | Msp_1581 | partially conserved hypothetical protein                                      | 2.7E-46  | MTH 745  | unknown (contains ferredoxin domain)                    | 3.9E-57  |
| MSM0396 | Msp_0233 | conserved hypothetical protein                                                | 2.3E-22  | NONE     |                                                         |          |
| MSM0397 | NONE     |                                                                               |          | NONE     |                                                         |          |
| MSM0398 | Msp_1229 | ribose-phosphate pyrophosphokinase                                            | 6.6E-04  | MTH 1114 | uracil phosphoribosyltransferase                        | 6.6E-23  |
| MSM0399 | NONE     |                                                                               |          | NONE     |                                                         |          |
| MSM0400 | NONE     |                                                                               |          | NONE     |                                                         |          |
| MSM0401 | NONE     |                                                                               |          | MTH 75   | surface protease related protein                        | 2.7E-27  |
| MSM0402 | Msp_1048 | deoxycytidine triphosphate deaminase                                          | 3.5E-76  | MTH 1847 | deoxycytidine triphosphate deaminase                    | 1.1E-75  |
| MSM0403 | Msp_1049 | GlyS                                                                          | 2.1E-188 | MTH 1846 | glycyl-tRNA synthetase                                  | 7.6E-196 |
| MSM0404 | Msp_0799 | predicted transcriptional regulator                                           | 1.6E-25  | MTH 1843 | unknown                                                 | 9.1E-26  |
| MSM0405 | Msp_1050 | predicted metal-dependent hydrolase                                           | 1.7E-58  | MTH 1842 | conserved protein                                       | 2.5E-46  |
| MSM0406 | Msp_1052 | hypothetical protein                                                          | 1.7E-10  | MTH 1838 | unknown                                                 | 6.6E-23  |
| MSM0407 | Msp_1053 | conserved hypothetical membrane-spanning protein                              | 1.7E-115 | MTH 1837 | unknown                                                 | 1.2E-124 |
| MSM0408 | Msp_0406 | 2-phosphoglycerate kinase-like/predicted small molecule-binding domain fusion | 4.2E-80  | MTH_1835 | 2-phosphoglycerate kinase homolog                       | 2.3E-91  |
| MSM0409 | Msp_0407 | conserved hypothetical protein                                                | 2.2E-42  | MTH 1834 | conserved protein                                       | 9.5E-47  |
| MSM0410 | Msp_0409 | conserved hypothetical protein                                                | 3.9E-52  | MTH 1833 | unknown                                                 | 4.6E-47  |
| MSM0411 | Msp_0145 | member of asn/thr-rich large protein family                                   | 1.3E-25  | MTH 1074 | putative membrane protein                               | 1.3E-115 |
| MSM0412 | Msp_0046 | member of asn/thr-rich large protein family                                   | 1.3E-06  | MTH 117  | unknown                                                 | 2.4E-41  |
| MSM0413 | Msp_0512 | predicted transcriptional regulator                                           | 2.7E-21  | MTH 313  | transcriptional regulator                               | 1.9E-16  |
| MSM0414 | Msp_0824 | predicted Na+-driven multidrug efflux pump                                    | 2.8E-138 | MTH 314  | conserved protein                                       | 6.7E-110 |
| MSM0415 | Msp_1362 | PyrH                                                                          | 3.5E-76  | MTH 879  | uridine monophosphate kinase                            | 2.8E-79  |
| MSM0416 | Msp_0974 | predicted Mg-dependent DNase                                                  | 1.5E-93  | MTH 233  | conserved protein                                       | 8.0E-27  |
| MSM0417 | Msp_1361 | hypothetical membrane-spanning protein                                        | 3.8E-15  | MTH 880  | unknown                                                 | 3.2E-14  |
| MSM0418 | Msp_1045 | conserved hypothetical protein                                                | 2.5E-34  | MTH 507  | conserved protein                                       | 2.5E-32  |
| MSM0419 | Msp_0253 | conserved hypothetical membrane-spanning protein                              | 1.4E-24  | MTH 506  | unknown                                                 | 4.2E-21  |
| MSM0420 | Msp_0355 | conserved hypothetical membrane-spanning protein                              | 3.0E-22  | MTH 882  | conserved protein                                       | 1.1E-27  |
| MSM0421 | NONE     |                                                                               |          | NONE     |                                                         |          |
| MSM0422 | Msp_0644 | conserved hypothetical membrane-spanning protein                              | 1.1E-36  | MTH 883  | unknown                                                 | 6.3E-48  |
| MSM0423 | Msp_0645 | predicted glycosyltransferase                                                 | 6.9E-157 | MTH 884  | teichoic acid biosynthesis related protein              | 4.5E-184 |
| MSM0424 | Msp_1360 | transcription initiation factor IIB (TFIIB)                                   | 8.1E-148 | MTH 885  | transcription initiation factor TFIIB                   | 9.2E-152 |
| MSM0425 | Msp_1359 | hypothetical protein                                                          | 2.3E-15  | MTH 886  | conserved protein                                       | 3.4E-19  |

|         |          |                                                  |          |          |                                                         |          |
|---------|----------|--------------------------------------------------|----------|----------|---------------------------------------------------------|----------|
| MSM0426 | Msp 1358 | predicted demethylmenaquinone methyltransferase  | 3.7E-33  | MTH 888  | conserved protein                                       | 3.2E-46  |
| MSM0427 | Msp 1356 | predicted DNA primase                            | 7.2E-108 | MTH 891  | conserved protein                                       | 2.9E-141 |
| MSM0428 | Msp 1355 | predicted site-specific recombinase/integrase    | 2.5E-66  | MTH 893  | integrase-recombinase protein                           | 7.7E-77  |
| MSM0429 | Msp 1354 | conserved hypothetical protein                   | 4.3E-46  | MTH 905  | conserved protein                                       | 1.8E-38  |
| MSM0430 | NONE     |                                                  |          | MTH 906  | unknown                                                 | 2.7E-17  |
| MSM0431 | Msp 1132 | predicted ATP-dependent carboligase              | 1.7E-44  | MTH 947  | conserved protein                                       | 2.8E-40  |
| MSM0432 | Msp 1131 | hypothetical membrane-spanning protein           | 5.5E-07  | NONE     |                                                         |          |
| MSM0433 | Msp 1133 | AhaD                                             | 1.6E-69  | NONE     | ATP synthase, subunit D                                 | 1.5E-73  |
| MSM0434 | Msp 1134 | AhaB                                             | 1.4E-212 | NONE     | ATP synthase, subunit B                                 | 4.5E-214 |
| MSM0435 | Msp 1135 | AhaA                                             | 1.4E-246 | NONE     | ATP synthase, subunit A                                 | 2.8E-260 |
| MSM0436 | Msp 1136 | AhaF                                             | 8.6E-25  | NONE     | ATP synthase, subunit F                                 | 3.1E-25  |
| MSM0437 | Msp 1137 | AhaC                                             | 1.5E-105 | NONE     | ATP synthase, subunit C                                 | 7.7E-116 |
| MSM0438 | Msp 1138 | AhaE                                             | 3.2E-50  | NONE     | ATP synthase, subunit E                                 | 5.9E-54  |
| MSM0439 | Msp 1139 | AhaK                                             | 7.0E-62  | NONE     | ATP synthase, subunit K                                 | 9.7E-70  |
| MSM0440 | Msp 1140 | AhaI                                             | 1.9E-148 | NONE     | ATP synthase, subunit I                                 | 3.5E-191 |
| MSM0441 | Msp 1141 | AhaH                                             | 7.6E-17  | MTH 961  | unknown                                                 | 3.1E-18  |
| MSM0442 | NONE     |                                                  |          | NONE     |                                                         |          |
| MSM0443 | NONE     |                                                  |          | NONE     |                                                         |          |
| MSM0444 | NONE     |                                                  |          | NONE     |                                                         |          |
| MSM0445 | Msp 0408 | putative nitroreductase protein                  | 2.0E-55  | MTH 120  | NADPH-oxidoreductase                                    | 1.4E-13  |
| MSM0446 | NONE     |                                                  |          | MTH 962  | citrate synthase I                                      | 6.2E-75  |
| MSM0447 | Msp 0338 | fumarate hydratase                               | 2.6E-15  | NONE     | fumarate hydratase, class I related protein             | 3.8E-75  |
| MSM0448 | NONE     |                                                  |          | MTH 964  | unknown                                                 | 4.6E-102 |
| MSM0449 | NONE     |                                                  |          | MTH 965  | conserved protein                                       | 1.1E-86  |
| MSM0450 | Msp 0680 | conserved hypothetical membrane-spanning protein | 2.4E-38  | NONE     |                                                         |          |
| MSM0451 | Msp 0679 | conserved hypothetical membrane-spanning protein | 7.8E-79  | NONE     |                                                         |          |
| MSM0452 | Msp 1142 | predicted DNA-binding protein                    | 3.9E-132 | MTH 966  | conserved protein                                       | 1.8E-130 |
| MSM0453 | Msp 1143 | putative transcriptional regulator               | 7.5E-58  | MTH 967  | conserved protein                                       | 1.3E-88  |
| MSM0454 | NONE     |                                                  |          | NONE     |                                                         |          |
| MSM0455 | Msp 1144 | conserved hypothetical protein                   | 2.2E-35  | MTH 969  | unknown                                                 | 1.0E-43  |
| MSM0456 | Msp 1005 | conserved hypothetical protein                   | 2.3E-17  | MTH 544  | conserved protein                                       | 2.7E-35  |
| MSM0457 | Msp 1145 | SerA                                             | 8.8E-158 | MTH 970  | phosphoglycerate dehydrogenase                          | 1.3E-177 |
| MSM0458 | NONE     |                                                  |          | NONE     |                                                         |          |
| MSM0459 | NONE     |                                                  |          | NONE     |                                                         |          |
| MSM0460 | NONE     |                                                  |          | NONE     |                                                         |          |
| MSM0461 | Msp 0983 | member of asn/thr-rich large protein family      | 3.0E-39  | MTH 911  | probable surface protein                                | 2.9E-18  |
| MSM0462 | Msp 1146 | partially conserved hypothetical protein         | 1.8E-38  | MTH 971  | unknown                                                 | 1.0E-33  |
| MSM0463 | Msp 1147 | conserved hypothetical protein                   | 2.0E-57  | MTH 972  | conserved protein                                       | 3.7E-61  |
| MSM0464 | Msp 1148 | predicted dinucleotide-utilizing protein         | 4.0E-59  | MTH 973  | conserved protein                                       | 1.1E-77  |
| MSM0465 | Msp 1149 | conserved hypothetical protein                   | 1.1E-17  | MTH 974  | unknown                                                 | 4.1E-23  |
| MSM0466 | Msp 1150 | predicted tRNA-binding protein                   | 2.4E-68  | MTH 975  | conserved protein                                       | 1.4E-70  |
| MSM0467 | NONE     |                                                  |          | MTH_978  | NADP-dependent glyceraldehyde-3-phosphate dehydrogenase | 8.1E-137 |
| MSM0468 | NONE     |                                                  |          | MTH 1490 | unknown                                                 | 2.2E-10  |
| MSM0469 | NONE     |                                                  |          | MTH 1490 | unknown                                                 | 1.8E-11  |
| MSM0470 | Msp 1151 | hypothetical membrane-spanning protein           | 1.4E-10  | MTH 979  | unknown                                                 | 7.2E-10  |
| MSM0471 | Msp 1152 | conserved hypothetical membrane-spanning protein | 7.1E-53  | MTH 980  | conserved protein                                       | 5.9E-70  |
| MSM0472 | Msp 1153 | PepQ                                             | 2.7E-69  | MTH 981  | aminopeptidase P                                        | 1.0E-65  |
| MSM0473 | Msp 0417 | hypothetical membrane-spanning protein           | 2.5E-04  | NONE     |                                                         |          |
| MSM0474 | NONE     |                                                  |          | NONE     |                                                         |          |
| MSM0475 | Msp 0417 | hypothetical membrane-spanning protein           | 1.8E-04  | NONE     |                                                         |          |

|         |          |                                                           |          |          |                                                           |          |
|---------|----------|-----------------------------------------------------------|----------|----------|-----------------------------------------------------------|----------|
| MSM0476 | NONE     |                                                           |          | MTH_93   | unknown                                                   | 8.5E-04  |
| MSM0477 | NONE     |                                                           |          | NONE     |                                                           |          |
| MSM0478 | NONE     |                                                           |          | NONE     |                                                           |          |
| MSM0479 | Msp_1154 | conserved hypothetical membrane-spanning protein          | 2.4E-45  | MTH_986  | conserved protein                                         | 2.1E-42  |
| MSM0480 | Msp_1155 | conserved hypothetical protein                            | 2.3E-95  | MTH_987  | conserved protein                                         | 6.0E-109 |
| MSM0481 | Msp_1274 | conserved hypothetical protein                            | 4.4E-53  | MTH_989  | conserved protein                                         | 2.2E-24  |
| MSM0482 | Msp_1275 | predicted ATP-utilizing enzyme                            | 4.6E-58  | MTH_990  | conserved protein                                         | 2.6E-51  |
| MSM0483 | NONE     |                                                           |          | MTH_991  | unknown                                                   | 8.6E-14  |
| MSM0484 | Msp_1276 | conserved hypothetical protein                            | 9.2E-76  | MTH_992  | inosine-5'-monophosphate dehydrogenase related protein IX | 2.8E-86  |
| MSM0485 | Msp_1410 | predicted universal stress protein                        | 9.6E-26  | MTH_993  | conserved protein                                         | 1.0E-33  |
| MSM0486 | Msp_1199 | predicted metal-dependent hydrolase                       | 3.1E-84  | MTH_994  | N-ethylammelmine chlorohydrolase related protein          | 4.2E-85  |
| MSM0487 | NONE     |                                                           |          | NONE     |                                                           |          |
| MSM0488 | Msp_1200 | CarB                                                      | 0.0E+00  | NONE     | carbamoyl-phosphate synthase, large subunit               | 0.0E+00  |
| MSM0489 | Msp_1201 | CarA                                                      | 1.5E-121 | NONE     | carbamoyl-phosphate synthase, small subunit               | 6.0E-125 |
| MSM0490 | Msp_0602 | conserved hypothetical protein                            | 1.0E-28  | MTH_738  | conserved protein                                         | 3.0E-06  |
| MSM0491 | Msp_0410 | NadC                                                      | 2.0E-64  | MTH_1832 | quinolinate phosphoribosyltransferase                     | 7.7E-61  |
| MSM0492 | Msp_0411 | putative ribonuclease Z                                   | 1.7E-76  | MTH_1831 | conserved protein                                         | 2.6E-92  |
| MSM0493 | Msp_0982 | predicted mechanosensitive ion channel                    | 6.7E-25  | MTH_1830 | conserved protein                                         | 1.7E-40  |
| MSM0494 | Msp_0643 | NadA                                                      | 3.6E-90  | MTH_1827 | quinolinate synthetase                                    | 6.8E-101 |
| MSM0495 | NONE     |                                                           |          | MTH_1821 | unknown                                                   | 2.7E-19  |
| MSM0496 | Msp_1526 | putative homoserine O-acetyltransferase                   | 1.2E-84  | MTH_1820 | homoserine O-acetyltransferase                            | 1.3E-67  |
| MSM0497 | Msp_0157 | hypothetical protein                                      | 6.9E-55  | MTH_1816 | conserved protein                                         | 2.6E-76  |
| MSM0498 | NONE     |                                                           |          | NONE     |                                                           |          |
| MSM0499 | Msp_1548 | hypothetical protein                                      | 1.0E-05  | MTH_1277 | unknown                                                   | 1.8E-06  |
| MSM0500 | Msp_0155 | predicted amidohydrolase                                  | 3.1E-75  | MTH_1811 | N-carbamoyl-D-amino acid amidohydrolase                   | 3.7E-77  |
| MSM0501 | Msp_0153 | conserved hypothetical protein                            | 1.8E-31  | MTH_1806 | phycocyanin alpha phycocyanobilin lyase CpcE              | 8.1E-34  |
| MSM0502 | Msp_0150 | predicted helicase                                        | 2.9e-310 | MTH_1802 | ATP-dependent helicase                                    | 0.0E+00  |
| MSM0503 | Msp_0553 | hypothetical protein                                      | 9.4E-19  | MTH_1799 | unknown                                                   | 3.9E-18  |
| MSM0504 | Msp_0927 | hypothetical protein                                      | 2.1E-05  | MTH_1641 | unknown                                                   | 1.4E-06  |
| MSM0505 | NONE     |                                                           |          | NONE     |                                                           |          |
| MSM0506 | Msp_0240 | predicted ATP-utilizing enzyme                            | 3.0E-148 | MTH_1201 | conserved protein                                         | 3.4E-145 |
| MSM0507 | Msp_0365 | predicted phosphoesterase                                 | 6.0E-49  | MTH_1774 | conserved protein                                         | 2.9E-52  |
| MSM0508 | Msp_0364 | putative 23S rRNA methylase                               | 1.9E-61  | MTH_1773 | cell division protein J                                   | 5.9E-70  |
| MSM0509 | Msp_0363 | hypothetical membrane-spanning protein                    | 1.4E-24  | MTH_1772 | unknown                                                   | 9.1E-26  |
| MSM0510 | Msp_0362 | predicted minichromosome maintenance protein              | 1.4E-255 | MTH_1770 | DNA replication initiator (Cdc21/Cdc54)                   | 1.4E-260 |
| MSM0511 | Msp_0361 | translation initiation factor aIF-2, beta subunit (eIF2B) | 2.3E-54  | NONE     | translation initiation factor eIF-2, beta subunit         | 6.9E-60  |
| MSM0512 | Msp_0360 | predicted NMD3-related protein                            | 5.2E-73  | MTH_1768 | conserved protein                                         | 2.1E-90  |
| MSM0513 | Msp_0359 | TyrS                                                      | 2.4E-100 | MTH_1767 | tyrosyl-tRNA synthetase                                   | 1.1E-109 |
| MSM0514 | Msp_0358 | hypothetical protein                                      | 3.5E-05  | MTH_1766 | unknown                                                   | 1.1E-08  |
| MSM0515 | Msp_0186 | MtaB2                                                     | 1.3E-156 | NONE     |                                                           |          |
| MSM0516 | Msp_0185 | MtaC3                                                     | 5.2E-89  | NONE     |                                                           |          |
| MSM0517 | Msp_0190 | MapA                                                      | 8.7E-167 | MTH_278  | ferredoxin                                                | 7.0E-04  |
| MSM0518 | Msp_0112 | MtaA2                                                     | 2.1E-94  | MTH_775  | cobalamin-independent methionine synthase                 | 3.4E-05  |
| MSM0519 | Msp_0183 | hypothetical protein                                      | 1.2E-32  | NONE     |                                                           |          |
| MSM0520 | Msp_0357 | putative thymidylate kinase                               | 2.1E-46  | MTH_1765 | thymidylate kinase                                        | 7.5E-47  |
| MSM0521 | NONE     |                                                           |          | NONE     |                                                           |          |
| MSM0522 | Msp_0984 | predicted peptidase                                       | 2.7E-234 | MTH_1763 | collagenase                                               | 3.4E-99  |
| MSM0523 | Msp_0984 | predicted peptidase                                       | 1.6E-96  | MTH_1763 | collagenase                                               | 6.8E-108 |
| MSM0524 | Msp_0354 | MutS                                                      | 4.3E-133 | MTH_1762 | DNA mismatch recognition protein MutS                     | 1.9E-176 |
| MSM0525 | Msp_1282 | predicted protein kinase                                  | 1.8E-104 | MTH_1645 | ABC transporter                                           | 3.1E-112 |

|         |          |                                                                  |          |          |                                                                            |          |
|---------|----------|------------------------------------------------------------------|----------|----------|----------------------------------------------------------------------------|----------|
| MSM0526 | NONE     |                                                                  |          | NONE     |                                                                            |          |
| MSM0527 | Msp_0017 | conserved hypothetical protein                                   | 3.5E-28  | NONE     |                                                                            |          |
| MSM0528 | Msp_0233 | conserved hypothetical protein                                   | 1.4E-10  | NONE     |                                                                            |          |
| MSM0529 | Msp_0725 | hypothetical protein                                             | 1.0E-04  | NONE     |                                                                            |          |
| MSM0530 | Msp_1323 | conserved hypothetical protein                                   | 3.3E-04  | MTH_72   | O-linked GlcNAc transferase                                                | 5.5E-06  |
| MSM0531 | NONE     |                                                                  |          | NONE     |                                                                            |          |
| MSM0532 | Msp_0233 | conserved hypothetical protein                                   | 3.4E-08  | NONE     |                                                                            |          |
| MSM0533 | Msp_0017 | conserved hypothetical protein                                   | 3.1E-16  | NONE     |                                                                            |          |
| MSM0534 | NONE     |                                                                  |          | NONE     |                                                                            |          |
| MSM0535 | Msp_0466 | hypothetical protein                                             | 7.1E-05  | NONE     |                                                                            |          |
| MSM0536 | NONE     |                                                                  |          | NONE     |                                                                            |          |
| MSM0537 | NONE     |                                                                  |          | NONE     |                                                                            |          |
| MSM0538 | Msp_1324 | predicted glycyl radical activating enzyme                       | 5.1E-07  | MTH_1586 | pyruvate formate-lyase activating enzyme                                   | 1.3E-05  |
| MSM0539 | Msp_0219 | conserved hypothetical protein                                   | 3.1E-04  | NONE     |                                                                            |          |
| MSM0540 | NONE     |                                                                  |          | NONE     |                                                                            |          |
| MSM0541 | NONE     |                                                                  |          | NONE     |                                                                            |          |
| MSM0542 | Msp_1128 | F420-dependent N5,N10-methylenetetrahydromethanopterin reductase | 3.4E-94  | NONE     | coenzyme F420-dependent N5,N10-methylene tetrahydromethanopterin reductase | 1.4E-132 |
| MSM0543 | Msp_0646 | predicted DNA repair photolyase                                  | 9.3E-28  | NONE     |                                                                            |          |
| MSM0544 | Msp_1127 | predicted Fe-S oxidoreductase                                    | 4.4E-92  | MTH_1751 | conserved protein                                                          | 1.3E-90  |
| MSM0545 | NONE     |                                                                  |          | NONE     |                                                                            |          |
| MSM0546 | Msp_1046 | hypothetical membrane-spanning protein                           | 2.6E-23  | MTH_813  | unknown                                                                    | 2.4E-27  |
| MSM0547 | Msp_0324 | predicted nucleotidyltransferase                                 | 1.6E-08  | MTH_1749 | unknown                                                                    | 7.2E-81  |
| MSM0548 | Msp_1148 | predicted dinucleotide-utilizing protein                         | 4.4E-04  | MTH_1747 | conserved protein                                                          | 5.4E-37  |
| MSM0549 | Msp_0830 | Trk-type potassium transport system, membrane protein            | 3.9E-04  | MTH_1746 | cytochrome C-type biogenesis protein                                       | 2.1E-28  |
| MSM0550 | Msp_0656 | hypothetical membrane-spanning protein                           | 2.0E-04  | MTH_1745 | protein disulphide isomerase                                               | 7.9E-20  |
| MSM0551 | Msp_1124 | conserved hypothetical protein                                   | 1.9E-68  | MTH_1744 | conserved protein                                                          | 2.4E-73  |
| MSM0552 | Msp_0330 | hypothetical protein                                             | 4.6E-10  | MTH_1743 | unknown                                                                    | 8.9E-12  |
| MSM0553 | Msp_0331 | predicted ATPase                                                 | 3.5E-92  | MTH_1742 | conserved protein                                                          | 1.2E-80  |
| MSM0554 | Msp_0161 | conserved hypothetical protein                                   | 2.8E-74  | MTH_1815 | conserved protein                                                          | 2.6E-83  |
| MSM0555 | Msp_0192 | predicted MoxR-like ATPase                                       | 3.9E-93  | MTH_1814 | conserved protein                                                          | 1.9E-87  |
| MSM0556 | Msp_0333 | predicted pterin-binding enzyme                                  | 4.1E-121 | MTH_1741 | conserved protein                                                          | 1.1E-153 |
| MSM0557 | Msp_0334 | PorC                                                             | 2.1E-53  | NONE     | pyruvate oxidoreductase, gamma subunit                                     | 2.1E-65  |
| MSM0558 | Msp_0335 | PorD                                                             | 4.3E-30  | NONE     | pyruvate oxidoreductase, gamma subunit                                     | 1.2E-32  |
| MSM0559 | Msp_0336 | PorA                                                             | 2.1E-140 | NONE     | pyruvate transporter permease PstC                                         | 2.3E-148 |
| MSM0560 | Msp_0337 | PorB                                                             | 1.8E-118 | NONE     | pyruvate oxidoreductase, beta subunit                                      | 2.2E-127 |
| MSM0561 | Msp_1447 | EhbK                                                             | 8.6E-08  | NONE     | formate hydrogenlyase, iron-sulfur subunit I                               | 4.5E-40  |
| MSM0562 | Msp_1447 | EhbK                                                             | 4.0E-09  | NONE     | formate hydrogenlyase, iron-sulfur subunit 2                               | 5.3E-14  |
| MSM0563 | Msp_0338 | fumarate hydratase                                               | 3.3E-96  | NONE     | fumarate hydratase, class I                                                | 8.3E-96  |
| MSM0564 | Msp_0339 | predicted phosphate uptake regulator                             | 4.8E-31  | MTH_1734 | phosphate transport system regulator                                       | 2.8E-47  |
| MSM0565 | Msp_0340 | PstB                                                             | 4.0E-107 | MTH_1731 | phosphate transport system ATP-binding                                     | 1.5E-105 |
| MSM0566 | Msp_0341 | PstA                                                             | 1.3E-94  | MTH_1730 | phosphate transporter permease PstC homolog                                | 4.5E-111 |
| MSM0567 | Msp_0342 | PstC                                                             | 7.0E-94  | MTH_1729 | phosphate transporter permease PstC                                        | 4.8E-100 |
| MSM0568 | Msp_0343 | PstS                                                             | 1.6E-64  | MTH_1727 | phosphate-binding protein PstS                                             | 2.7E-81  |
| MSM0569 | Msp_0344 | predicted phosphate uptake regulator                             | 5.5E-62  | MTH_1724 | phosphate transport system regulator related protein                       | 2.4E-82  |
| MSM0570 | Msp_0346 | conserved hypothetical membrane-spanning protein                 | 5.2E-17  | MTH_1723 | unknown                                                                    | 9.1E-26  |
| MSM0571 | NONE     |                                                                  |          | MTH_1137 | conserved protein (FlpA)                                                   | 5.2E-165 |
| MSM0572 | NONE     |                                                                  |          | NONE     | H(2)-dependent N5,N10-methylenetetrahydromethanopterin dehydrogenase       | 2.4E-128 |
| MSM0573 | Msp_0296 | CofG                                                             | 1.4E-15  | MTH_1143 | biotin synthetase (BioB)                                                   | 5.1E-112 |
| MSM0574 | NONE     |                                                                  |          | MTH_1144 | conserved protein                                                          | 2.9E-38  |

|         |          |                                                                    |          |          |                                             |          |
|---------|----------|--------------------------------------------------------------------|----------|----------|---------------------------------------------|----------|
| MSM0575 | Msp_1393 | conserved hypothetical membrane-spanning protein                   | 8.5E-05  | MTH_1145 | conserved protein                           | 2.9E-38  |
| MSM0576 | NONE     |                                                                    |          | MTH_1146 | conserved protein                           | 2.9E-38  |
| MSM0577 | NONE     |                                                                    |          | MTH_1147 | conserved protein                           | 6.1E-52  |
| MSM0578 | NONE     |                                                                    |          | MTH_1148 | conserved protein                           | 8.1E-34  |
| MSM0579 | Msp_1581 | partially conserved hypothetical protein                           | 7.5E-10  | MTH_1106 | ferredoxin                                  | 1.3E-10  |
| MSM0580 | Msp_0911 | member of asn/thr-rich large protein family                        | 2.5E-05  | MTH_654  | unknown                                     | 5.2E-39  |
| MSM0581 | Msp_0166 | conserved hypothetical membrane-spanning protein                   | 3.9E-29  | MTH_655  | conserved protein                           | 6.7E-94  |
| MSM0582 | Msp_0737 | putative peptide methionine sulfoxide reductase MsrA/MsrB          | 4.5E-122 | MTH_535  | peptide methionine sulfoxide reductase      | 2.4E-34  |
| MSM0583 | Msp_0655 | CbiM2                                                              | 2.7E-69  | MTH_1707 | cobalamin biosynthesis protein M            | 1.5E-64  |
| MSM0584 | Msp_0656 | hypothetical membrane-spanning protein                             | 2.2E-12  | MTH_1706 | unknown                                     | 3.4E-12  |
| MSM0585 | Msp_0657 | CbiQ2                                                              | 5.4E-55  | MTH_1705 | cobalt transport membrane protein           | 4.2E-60  |
| MSM0586 | Msp_0401 | CbiO1                                                              | 7.6E-81  | MTH_1704 | cobalt transport ATP-binding protein O      | 1.2E-85  |
| MSM0587 | Msp_1438 | hypothetical protein                                               | 5.9E-10  | NONE     |                                             |          |
| MSM0588 | Msp_1441 | FeoA                                                               | 1.7E-12  | MTH_1362 | unknown                                     | 2.4E-11  |
| MSM0589 | Msp_1440 | FeoB                                                               | 3.6E-200 | MTH_1361 | ferrous iron transport protein B            | 5.7E-152 |
| MSM0590 | NONE     |                                                                    |          | NONE     |                                             |          |
| MSM0591 | NONE     |                                                                    |          | NONE     |                                             |          |
| MSM0592 | Msp_0202 | conserved hypothetical membrane-spanning protein                   | 2.3E-40  | MTH_230  | unknown                                     | 1.2E-48  |
| MSM0593 | Msp_0610 | predicted ABC-type multidrug transport system, ATP-binding protein | 3.9E-77  | MTH_1487 | ABC transporter (ATP-binding)               | 2.0E-37  |
| MSM0594 | Msp_0609 | conserved hypothetical membrane-spanning protein                   | 2.7E-44  | NONE     |                                             |          |
| MSM0595 | Msp_0609 | conserved hypothetical membrane-spanning protein                   | 1.8E-40  | NONE     |                                             |          |
| MSM0596 | Msp_1163 | predicted type II secretion protein F                              | 3.0E-47  | MTH_1703 | unknown                                     | 4.9E-59  |
| MSM0597 | Msp_1162 | predicted type II/IV secretion protein                             | 4.1E-121 | MTH_1702 | secretory protein kinase                    | 2.9E-157 |
| MSM0598 | Msp_1161 | conserved hypothetical protein                                     | 3.5E-44  | MTH_1701 | unknown                                     | 5.6E-42  |
| MSM0599 | Msp_1160 | conserved hypothetical membrane-spanning protein                   | 1.3E-94  | MTH_1700 | conserved protein                           | 8.9E-99  |
| MSM0600 | Msp_0512 | predicted transcriptional regulator                                | 7.9E-15  | MTH_313  | transcriptional regulator                   | 5.5E-12  |
| MSM0601 | Msp_0017 | conserved hypothetical protein                                     | 1.7E-28  | NONE     |                                             |          |
| MSM0602 | Msp_1159 | elongation factor 1-beta (aEF-1beta) (ef1B)                        | 2.2E-26  | MTH_1699 | translation elongation factor EF-1b         | 1.3E-28  |
| MSM0603 | Msp_1158 | predicted Zn-ribbon RNA-binding protein                            | 4.7E-17  | MTH_1178 | conserved protein                           | 8.3E-04  |
| MSM0604 | Msp_1157 | predicted amino acid kinase                                        | 1.7E-42  | MTH_1698 | delta 1-pyrroline-5-carboxylate synthetase  | 6.2E-43  |
| MSM0605 | Msp_1156 | putative peptidyl-tRNA hydrolase                                   | 1.5E-29  | MTH_1697 | conserved protein                           | 1.1E-36  |
| MSM0606 | NONE     |                                                                    |          | NONE     |                                             |          |
| MSM0607 | Msp_0613 | predicted ATPase                                                   | 4.1E-224 | MTH_1695 | RNase L inhibitor                           | 6.8E-227 |
| MSM0608 | NONE     |                                                                    |          | NONE     |                                             |          |
| MSM0609 | Msp_0147 | ferredoxin                                                         | 2.6E-04  | MTH_221  | unknown                                     | 6.4E-25  |
| MSM0610 | Msp_0370 | putative aspartate aminotransferase                                | 8.5E-121 | MTH_1694 | aspartate aminotransferase related protein  | 9.6E-134 |
| MSM0611 | Msp_0369 | RadB                                                               | 3.9E-61  | MTH_1693 | DNA repair protein Rad51 homolog            | 3.6E-63  |
| MSM0612 | Msp_0096 | conserved hypothetical protein                                     | 1.9E-36  | MTH_1692 | conserved protein                           | 3.8E-43  |
| MSM0613 | Msp_0095 | predicted phosphatidylglycerophosphate synthase                    | 1.0E-46  | MTH_1691 | conserved protein                           | 4.3E-44  |
| MSM0614 | Msp_0094 | conserved hypothetical protein                                     | 2.1E-14  | MTH_1690 | unknown                                     | 1.7E-17  |
| MSM0615 | Msp_0675 | conserved hypothetical protein                                     | 4.7E-159 | MTH_1686 | conserved protein                           | 7.7E-164 |
| MSM0616 | Msp_0440 | member of asn/thr-rich large protein family                        | 1.1E-93  | MTH_716  | cell surface glycoprotein (s-layer protein) | 1.4E-14  |
| MSM0617 | Msp_0160 | ThiI                                                               | 1.4E-102 | MTH_1685 | conserved protein                           | 1.1E-118 |
| MSM0618 | Msp_1489 | predicted potassium transport system, membrane component           | 3.0E-09  | MTH_760  | Na+/H+-exchanging protein:Na+/H+ antiporter | 2.3E-16  |
| MSM0619 | Msp_1262 | AlaS                                                               | 7.0E-300 | MTH_1683 | alanyl-tRNA synthetase                      | 1.5e-316 |
| MSM0620 | Msp_1263 | 50S ribosomal protein L12P                                         | 1.9E-36  | MTH_1682 | ribosomal protein Lp1                       | 9.4E-40  |
| MSM0621 | Msp_1264 | 50S ribosomal protein L10P                                         | 5.3E-96  | MTH_1681 | ribosomal protein Lp0 (E.coli )             | 2.7E-106 |
| MSM0622 | Msp_1265 | 50S ribosomal protein L1P                                          | 9.5E-74  | MTH_1680 | ribosomal protein L10a (E.coli )            | 1.3E-81  |

|         |          |                                                              |          |          |                                                                           |          |
|---------|----------|--------------------------------------------------------------|----------|----------|---------------------------------------------------------------------------|----------|
| MSM0623 | Msp_1266 | 50S ribosomal protein L11P                                   | 1.3E-62  | MTH_1679 | ribosomal protein L12 (E.coli )                                           | 2.2E-63  |
| MSM0624 | Msp_1267 | putative transcription antiterminator                        | 1.3E-46  | MTH_1678 | transcription termination factor NusG                                     | 1.1E-61  |
| MSM0625 | Msp_1268 | partially conserved hypothetical membrane-spanning protein   | 1.3E-12  | MTH_1677 | protein translocation complex sec61 gamma subunit related protein         | 1.1E-13  |
| MSM0626 | Msp_1269 | FtsZ                                                         | 8.7E-135 | MTH_1676 | cell division protein FtsZ                                                | 1.7E-143 |
| MSM0627 | Msp_0307 | MtrH                                                         | 8.5E-105 | MTH_1156 | N5-methyl-tetrahydromethanopterin:coenzyme M methyltransferase, subunit H | 3.7E-116 |
| MSM0628 | NONE     |                                                              |          | MTH_1675 | conserved protein                                                         | 7.2E-49  |
| MSM0629 | Msp_0017 | conserved hypothetical protein                               | 1.7E-28  | NONE     |                                                                           |          |
| MSM0630 | Msp_1271 | conserved hypothetical protein                               | 7.1E-69  | MTH_1670 | conserved protein                                                         | 4.2E-76  |
| MSM0631 | Msp_1272 | predicted transcription initiation factor IIE, alpha subunit | 3.4E-37  | MTH_1669 | conserved protein                                                         | 4.6E-47  |
| MSM0632 | Msp_1273 | conserved hypothetical protein                               | 6.2E-38  | MTH_1668 | conserved protein                                                         | 1.7E-40  |
| MSM0633 | Msp_1063 | predicted RNA-binding protein                                | 9.2E-92  | MTH_1665 | conserved protein                                                         | 6.9E-92  |
| MSM0634 | Msp_1064 | conserved hypothetical protein                               | 1.8E-24  | MTH_1664 | conserved protein                                                         | 6.2E-27  |
| MSM0635 | Msp_1069 | predicted regulator of aminoacid metabolism                  | 1.6E-41  | MTH_1654 | unknown                                                                   | 1.8E-45  |
| MSM0636 | Msp_1067 | hypothetical protein                                         | 1.6E-23  | MTH_1649 | hydrogenase expression/formation protein HypC                             | 1.2E-25  |
| MSM0637 | Msp_1077 | predicted dihydrolipoamide dehydrogenase-related protein     | 2.4E-93  | MTH_1648 | dihydrolipoamide dehydrogenase                                            | 1.2E-92  |
| MSM0638 | Msp_1343 | hypothetical membrane-spanning multicopy protein A 3         | 2.6E-78  | MTH_1646 | unknown                                                                   | 5.9E-54  |
| MSM0639 | Msp_1080 | conserved hypothetical membrane-spanning protein             | 4.5E-67  | MTH_1644 | unknown                                                                   | 1.8E-52  |
| MSM0640 | Msp_1081 | predicted release factor aRF1                                | 2.2E-106 | MTH_1642 | cell division protein                                                     | 9.6E-118 |
| MSM0641 | Msp_1083 | putative prephenate dehydrogenase                            | 4.4E-92  | MTH_1640 | chorismate mutase                                                         | 1.8E-100 |
| MSM0642 | Msp_1084 | CdcH                                                         | 9.3E-273 | MTH_1639 | cell division control protein Cdc48                                       | 4.7E-299 |
| MSM0643 | Msp_0227 | conserved hypothetical protein                               | 3.3E-71  | MTH_1574 | conserved protein                                                         | 5.2E-78  |
| MSM0644 | Msp_0228 | ThiC1                                                        | 1.2E-144 | MTH_1576 | thiamine biosynthesis protein                                             | 3.2E-158 |
| MSM0645 | Msp_0258 | ATP-dependent DNA ligase                                     | 1.1E-148 | MTH_1580 | DNA ligase                                                                | 3.9E-176 |
| MSM0646 | Msp_0504 | conserved hypothetical membrane-spanning protein             | 5.5E-30  | NONE     |                                                                           |          |
| MSM0647 | Msp_0259 | hypothetical protein                                         | 3.8E-15  | MTH_1581 | conserved protein                                                         | 4.8E-20  |
| MSM0648 | Msp_0263 | predicted phosphomannomutase                                 | 1.2E-169 | MTH_1584 | phosphomannomutase                                                        | 9.9E-171 |
| MSM0649 | Msp_0970 | hypothetical membrane-spanning protein                       | 3.5E-44  | MTH_559  | conserved protein                                                         | 1.0E-06  |
| MSM0650 | Msp_0971 | hypothetical protein                                         | 1.2E-36  | MTH_1787 | conserved protein                                                         | 1.3E-07  |
| MSM0651 | Msp_1323 | conserved hypothetical protein                               | 1.5E-98  | MTH_1585 | O-linked GlcNAc transferase                                               | 1.9E-105 |
| MSM0652 | Msp_1324 | predicted glycyl radical activating enzyme                   | 6.3E-45  | MTH_1586 | pyruvate formate-lyase activating enzyme                                  | 1.5E-50  |
| MSM0653 | Msp_1326 | HisC                                                         | 2.5E-112 | MTH_1587 | histidinol-phosphate aminotransferase                                     | 1.2E-119 |
| MSM0654 | Msp_1325 | predicted carbonic anhydrase/acetyltransferase               | 1.8E-47  | MTH_1588 | ferripyochelin binding protein                                            | 4.6E-47  |
| MSM0655 | Msp_1301 | predicted nucleoside-diphosphate-sugar pyrophosphorylase     | 3.0E-134 | MTH_1589 | glucose-1-phosphate thymidyltransferase homolog                           | 8.1E-137 |
| MSM0656 | Msp_1300 | predicted phosphomannomutase                                 | 9.7E-136 | MTH_1590 | phosphomannomutase                                                        | 7.6E-141 |
| MSM0657 | Msp_1299 | ApgM2                                                        | 6.1E-150 | MTH_1591 | phosphonopyruvate decarboxylase                                           | 6.0E-148 |
| MSM0658 | NONE     |                                                              |          | NONE     |                                                                           |          |
| MSM0659 | Msp_1298 | conserved hypothetical membrane-spanning protein             | 4.8E-63  | MTH_1592 | conserved protein                                                         | 1.1E-77  |
| MSM0660 | Msp_1568 | conserved hypothetical membrane-spanning protein             | 3.9E-52  | NONE     |                                                                           |          |
| MSM0661 | Msp_1297 | 30S ribosomal protein S3Ae                                   | 3.2E-66  | MTH_1593 | ribosomal protein S3a                                                     | 8.4E-71  |
| MSM0662 | Msp_0712 | hypothetical membrane-spanning protein                       | 8.9E-07  | NONE     |                                                                           |          |
| MSM0663 | Msp_1295 | predicted iron-molybdenum cluster-binding protein            | 1.4E-08  | MTH_1594 | conserved protein                                                         | 1.2E-16  |
| MSM0664 | Msp_0540 | predicted multimeric flavodoxin                              | 2.4E-22  | MTH_1595 | conserved protein                                                         | 5.0E-57  |
| MSM0665 | Msp_0642 | predicted purine nucleoside phosphorylase                    | 7.4E-74  | MTH_1596 | methylthioadenosine phosphorylase                                         | 3.7E-77  |
| MSM0666 | Msp_0641 | conserved hypothetical membrane-spanning protein             | 6.7E-176 | MTH_1597 | conserved protein                                                         | 3.5E-184 |
| MSM0667 | Msp_0587 | hypothetical membrane-spanning protein                       | 1.8E-05  | MTH_520  | unknown                                                                   | 3.7E-13  |
| MSM0668 | Msp_0637 | conserved hypothetical protein                               | 4.9E-22  | MTH_1598 | conserved protein                                                         | 5.8E-40  |
| MSM0669 | NONE     |                                                              |          | NONE     |                                                                           |          |
| MSM0670 | NONE     |                                                              |          | NONE     |                                                                           |          |

|         |          |                                                            |          |          |                                                         |          |
|---------|----------|------------------------------------------------------------|----------|----------|---------------------------------------------------------|----------|
| MSM0671 | Msp_0635 | cell division control protein 6-like 2                     | 2.7E-108 | MTH_1599 | Cdc6 related protein                                    | 5.4E-131 |
| MSM0672 | Msp_0661 | conserved hypothetical protein                             | 1.4E-56  | MTH_1600 | conserved protein                                       | 7.0E-67  |
| MSM0673 | Msp_1557 | conserved hypothetical membrane-spanning protein           | 5.1E-27  | NONE     |                                                         |          |
| MSM0674 | NONE     |                                                            |          | NONE     |                                                         |          |
| MSM0675 | NONE     |                                                            |          | NONE     |                                                         |          |
| MSM0676 | Msp_1557 | conserved hypothetical membrane-spanning protein           | 9.7E-33  | NONE     |                                                         |          |
| MSM0677 | Msp_0662 | putative aspartate aminotransferase                        | 1.3E-131 | MTH_1601 | aspartate aminotransferase                              | 7.3E-136 |
| MSM0678 | Msp_0505 | conserved hypothetical membrane-spanning protein           | 8.1E-29  | MTH_519  | unknown                                                 | 1.1E-20  |
| MSM0679 | Msp_0587 | hypothetical membrane-spanning protein                     | 8.1E-12  | MTH_520  | unknown                                                 | 8.1E-34  |
| MSM0680 | Msp_0757 | predicted ATPase                                           | 2.4E-109 | NONE     |                                                         |          |
| MSM0681 | NONE     |                                                            |          | NONE     |                                                         |          |
| MSM0682 | NONE     |                                                            |          | NONE     |                                                         |          |
| MSM0683 | Msp_0380 | hypothetical protein                                       | 3.1E-13  | MTH_626  | unknown                                                 | 9.7E-22  |
| MSM0684 | Msp_0381 | hypothetical membrane-spanning protein                     | 1.2E-09  | MTH_625  | unknown                                                 | 1.5E-04  |
| MSM0685 | NONE     |                                                            |          | NONE     |                                                         |          |
| MSM0686 | Msp_0605 | predicted thiamine pyrophosphate-requiring enzyme          | 2.1E-94  | NONE     | acetolactate synthase, large subunit homolog            | 8.5E-94  |
| MSM0687 | Msp_0604 | predicted deoxycytidine triphosphate deaminase             | 1.6E-57  | MTH_1605 | deoxycytidine-triphosphate deaminase related protein    | 8.2E-57  |
| MSM0688 | Msp_1409 | predicted tautomerase                                      | 3.2E-11  | MTH_1606 | unknown                                                 | 1.7E-08  |
| MSM0689 | NONE     |                                                            |          | NONE     |                                                         |          |
| MSM0690 | Msp_0767 | predicted helicase                                         | 2.1E-243 | NONE     | ATP-dependent RNA helicase, eIF-4A family               | 9.5E-09  |
| MSM0691 | Msp_0006 | predicted NUDIX-related protein                            | 1.4E-40  | MTH_1336 | mutator MutT protein homolog                            | 4.1E-14  |
| MSM0692 | NONE     |                                                            |          | NONE     |                                                         |          |
| MSM0693 | Msp_0113 | conserved hypothetical protein                             | 1.4E-13  | MTH_540  | intracellular protein transport protein                 | 7.2E-10  |
| MSM0694 | NONE     |                                                            |          | NONE     |                                                         |          |
| MSM0695 | Msp_0767 | predicted helicase                                         | 1.0E-13  | NONE     | ATP-dependent RNA helicase, eIF-4A family               | 3.7E-10  |
| MSM0696 | Msp_1095 | DNA double-strand break repair protein Rad50               | 4.0E-04  | NONE     |                                                         |          |
| MSM0697 | NONE     |                                                            |          | NONE     |                                                         |          |
| MSM0698 | NONE     |                                                            |          | NONE     |                                                         |          |
| MSM0699 | Msp_0738 | predicted Na <sup>+</sup> -dependent transporter           | 4.1E-137 | MTH_1909 | unknown                                                 | 5.8E-04  |
| MSM0700 | Msp_0921 | putative poly-gamma-glutamate biosynthesis protein         | 1.0E-108 | NONE     |                                                         |          |
| MSM0701 | Msp_0601 | partially conserved hypothetical protein, predicted GTPase | 2.4E-116 | MTH_1608 | signal recognition particle protein (docking protein)   | 3.6E-111 |
| MSM0702 | Msp_0600 | conserved hypothetical protein                             | 1.5E-20  | MTH_1609 | conserved protein                                       | 1.1E-36  |
| MSM0703 | Msp_0599 | RplX                                                       | 4.1E-18  | MTH_1610 | ribosomal protein L18a                                  | 1.0E-17  |
| MSM0704 | Msp_0598 | translation initiation factor 6 (aIF-6)                    | 3.7E-56  | MTH_1611 | conserved protein                                       | 3.8E-59  |
| MSM0705 | Msp_0597 | 50S ribosomal protein L31e                                 | 1.4E-22  | MTH_1612 | ribosomal protein L31                                   | 4.7E-29  |
| MSM0706 | NONE     |                                                            |          | MTH_1613 | ribosomal protein L39                                   | 1.2E-16  |
| MSM0707 | Msp_0596 | predicted subunit of tRNA methyltransferase                | 2.8E-58  | MTH_1614 | conserved protein                                       | 3.8E-59  |
| MSM0708 | Msp_0595 | partially conserved hypothetical protein                   | 1.4E-31  | MTH_1615 | conserved protein                                       | 3.1E-32  |
| MSM0709 | Msp_0594 | 30S ribosomal protein S19e                                 | 1.5E-52  | MTH_1616 | ribosomal protein S19                                   | 5.9E-54  |
| MSM0710 | Msp_0593 | hypothetical protein                                       | 1.3E-28  | MTH_1617 | conserved protein                                       | 1.3E-19  |
| MSM0711 | Msp_0592 | putative ribonuclease P, subunit 4                         | 8.7E-32  | MTH_1618 | conserved protein                                       | 3.0E-34  |
| MSM0712 | NONE     |                                                            |          | NONE     |                                                         |          |
| MSM0713 | Msp_0589 | predicted nucleotide kinase                                | 3.1E-36  | MTH_1619 | conserved protein (adenylate kinase related)            | 2.4E-34  |
| MSM0714 | Msp_0660 | predicted GTPase                                           | 2.1E-46  | NONE     | GTP-binding protein, GTP1/OBG family                    | 3.9E-50  |
| MSM0715 | Msp_0660 | predicted GTPase                                           | 2.4E-77  | NONE     | GTP-binding protein, GTP1/OBG family                    | 1.2E-87  |
| MSM0716 | Msp_0368 | conserved hypothetical membrane-spanning protein           | 1.1E-141 | MTH_1623 | oligosaccharyl transferase STT3 subunit related protein | 7.3E-88  |
| MSM0717 | Msp_0366 | TopA                                                       | 8.0E-228 | MTH_1624 | DNA topoisomerase I                                     | 3.1E-247 |
| MSM0718 | NONE     |                                                            |          | MTH_1625 | unknown                                                 | 4.6E-15  |
| MSM0719 | Msp_1096 | putative phosphoserine phosphatase                         | 2.7E-124 | MTH_1626 | phosphoserine phosphatase                               | 1.3E-83  |
| MSM0720 | Msp_1097 | TATA-box binding protein                                   | 5.0E-68  | MTH_1627 | TATA-binding transcription initiation factor            | 1.2E-73  |

|         |          |                                              |          |          |                                                              |          |
|---------|----------|----------------------------------------------|----------|----------|--------------------------------------------------------------|----------|
| MSM0721 | Msp_1098 | predicted adenylate cyclase                  | 2.6E-39  | MTH_1629 | conserved protein                                            | 1.3E-42  |
| MSM0722 | Msp_1099 | LeuA2                                        | 1.9E-91  | MTH_1630 | 2-isopropylmalate synthase                                   | 1.5E-151 |
| MSM0723 | Msp_1100 | LeuC2                                        | 2.7E-140 | NONE     | 3-isopropylmalate dehydratase, LeuC subunit                  | 5.8E-150 |
| MSM0724 | Msp_0326 | hypothetical protein                         | 9.1E-04  | MTH_1632 | conserved protein                                            | 1.0E-40  |
| MSM0725 | Msp_1086 | flap structure-specific endonuclease         | 9.2E-92  | MTH_1633 | DNA repair protein Rad2                                      | 7.8E-100 |
| MSM0726 | NONE     |                                              |          | MTH_1635 | conserved protein                                            | 7.1E-42  |
| MSM0727 | Msp_1085 | AhcY                                         | 1.3E-163 | MTH_1636 | S-adenosylhomocysteine hydrolase                             | 3.7E-164 |
| MSM0728 | Msp_0524 | predicted oxidoreductase                     | 4.4E-92  | MTH_907  | conserved protein                                            | 2.5E-62  |
| MSM0729 | Msp_0231 | predicted E1-like enzyme                     | 2.1E-46  | MTH_1571 | molybdopterin biosynthesis protein MoeB homolog              | 1.7E-65  |
| MSM0730 | Msp_0017 | conserved hypothetical protein               | 1.7E-28  | NONE     |                                                              |          |
| MSM0731 | Msp_0113 | conserved hypothetical protein               | 1.6E-13  | MTH_511  | DNA helicase II                                              | 4.6E-07  |
| MSM0732 | Msp_0873 | TruB                                         | 3.2E-105 | MTH_32   | centromere/microtubule-binding protein                       | 3.2E-110 |
| MSM0733 | Msp_0880 | 50S ribosomal protein L14e                   | 2.3E-24  | MTH_31   | ribosomal protein L14                                        | 4.1E-23  |
| MSM0734 | Msp_0881 | putative cytidylate kinase                   | 1.8E-56  | MTH_30   | cytidylate kinase                                            | 3.8E-52  |
| MSM0735 | Msp_0882 | 50S ribosomal protein L34e                   | 2.4E-29  | MTH_29   | ribosomal protein L34 (E.coli )                              | 3.3E-37  |
| MSM0736 | Msp_0883 | hypothetical membrane-spanning protein       | 1.2E-34  | MTH_28   | conserved protein                                            | 1.1E-50  |
| MSM0737 | Msp_0884 | AdkA                                         | 1.1E-61  | MTH_27   | adenylate kinase                                             | 1.1E-63  |
| MSM0738 | Msp_0885 | SecY                                         | 6.6E-153 | MTH_26   | preprotein translocase SecY                                  | 1.0E-145 |
| MSM0739 | Msp_0886 | 50S ribosomal protein L15P                   | 1.9E-43  | MTH_25   | ribosomal protein L27a (E.coli )                             | 4.1E-46  |
| MSM0740 | Msp_0887 | 50S ribosomal protein L30P                   | 9.7E-49  | MTH_24   | ribosomal protein L7 (E.coli )                               | 1.2E-53  |
| MSM0741 | Msp_0888 | 30S ribosomal protein S5P                    | 3.5E-92  | MTH_23   | ribosomal protein S2 (E.coli )                               | 3.7E-93  |
| MSM0742 | Msp_0889 | 50S ribosomal protein L18P                   | 6.7E-57  | MTH_22   | ribosomal protein L5                                         | 8.9E-67  |
| MSM0743 | Msp_0890 | 50S ribosomal protein L19e                   | 4.6E-58  | MTH_21   | ribosomal protein L19                                        | 1.5E-64  |
| MSM0744 | Msp_0891 | 50S ribosomal protein L32e                   | 6.6E-34  | MTH_20   | ribosomal protein L32                                        | 3.1E-41  |
| MSM0745 | Msp_0892 | 50S ribosomal protein L6P                    | 5.7E-60  | MTH_19   | ribosomal protein L9 (E.coli )                               | 4.3E-67  |
| MSM0746 | Msp_0893 | 30S ribosomal protein S8P                    | 9.5E-58  | MTH_18   | ribosomal protein S15a (E.coli )                             | 1.2E-55  |
| MSM0747 | Msp_0894 | 30S ribosomal protein S14P                   | 2.1E-21  | MTH_17   | ribosomal protein S29 (E.coli )                              | 7.6E-22  |
| MSM0748 | Msp_0895 | 50S ribosomal protein L15P                   | 2.4E-61  | MTH_16   | ribosomal protein L21 (E.coli )                              | 2.9E-61  |
| MSM0749 | Msp_0896 | 30S ribosomal protein S4e                    | 3.0E-70  | MTH_15   | ribosomal protein S4                                         | 1.8E-77  |
| MSM0750 | Msp_0897 | 50S ribosomal protein L24P                   | 2.4E-29  | MTH_14   | ribosomal protein L26 (E.coli )                              | 1.3E-35  |
| MSM0751 | Msp_0898 | 50S ribosomal protein L14P                   | 1.4E-56  | MTH_13   | ribosomal protein L23 (E.coli )                              | 1.0E-56  |
| MSM0752 | Msp_0899 | 30S ribosomal protein S17P                   | 1.4E-42  | MTH_12   | ribosomal protein S11 (E.coli )                              | 1.4E-45  |
| MSM0753 | Msp_0900 | putative ribonuclease P, component 1         | 4.8E-24  | MTH_11   | conserved protein                                            | 8.7E-21  |
| MSM0754 | Msp_0901 | protein translation factor SUI1-like protein | 2.4E-45  | MTH_10   | ribosomal protein SUI1                                       | 3.6E-47  |
| MSM0755 | Msp_0902 | 50S ribosomal protein L29P                   | 3.3E-16  | MTH_9    | ribosomal protein L35 (E.coli )                              | 7.9E-20  |
| MSM0756 | Msp_0903 | 30S ribosomal protein S3P                    | 6.8E-96  | MTH_8    | ribosomal protein S3 (E.coli )                               | 1.2E-96  |
| MSM0757 | Msp_0904 | 50S ribosomal protein L22P                   | 1.3E-46  | MTH_7    | ribosomal protein L17 (E.coli )                              | 3.5E-56  |
| MSM0758 | Msp_0905 | 30S ribosomal protein S19P                   | 1.4E-58  | MTH_6    | ribosomal protein S15 (E.coli )                              | 1.3E-58  |
| MSM0759 | Msp_0906 | 50S ribosomal protein L2P                    | 3.1E-107 | MTH_5    | ribosomal protein L8 (E.coli )                               | 1.9E-105 |
| MSM0760 | Msp_0907 | 50S ribosomal protein L23P                   | 2.8E-26  | MTH_4    | ribosomal protein L23a (E.coli )                             | 5.4E-28  |
| MSM0761 | Msp_0908 | 50S ribosomal protein L1e                    | 4.5E-99  | MTH_3    | ribosomal protein L4 (E.coli )                               | 2.6E-99  |
| MSM0762 | Msp_0909 | 50S ribosomal protein L3P                    | 1.5E-121 | MTH_2    | ribosomal protein L3 (E.coli )                               | 1.1E-132 |
| MSM0763 | Msp_0910 | conserved hypothetical protein               | 1.1E-79  | MTH_1    | conserved protein                                            | 1.2E-73  |
| MSM0764 | Msp_1319 | predicted DNA modification methylase         | 1.7E-04  | MTH_1918 | possible protein methyltransferase                           | 3.7E-45  |
| MSM0765 | Msp_0914 | PycA                                         | 1.7E-186 | MTH_1917 | biotin carboxylase                                           | 5.5E-202 |
| MSM0766 | Msp_0915 | partially conserved hypothetical protein     | 4.0E-36  | MTH_1916 | biotin acetyl-CoA carboxylase ligase/biotin operon repressor | 5.3E-62  |
| MSM0767 | Msp_0916 | predicted selenocysteine synthase            | 2.8E-99  | MTH_1914 | conserved protein                                            | 2.3E-100 |
| MSM0768 | Msp_0917 | hypothetical protein                         | 7.5E-04  | MTH_1912 | unknown                                                      | 1.1E-11  |
| MSM0769 | Msp_0791 | fumarate hydratase                           | 3.1E-59  | NONE     | fumarate hydratase, class I related protein                  | 1.5E-50  |



|         |          |                                                                                             |          |          |                                                                |          |
|---------|----------|---------------------------------------------------------------------------------------------|----------|----------|----------------------------------------------------------------|----------|
| MSM0770 | Msp_1112 | CbiO2                                                                                       | 1.2E-43  | NONE     | methyl coenzyme M reductase system, component A2 homolog       | 8.3E-64  |
| MSM0771 | Msp_0657 | CbiQ2                                                                                       | 1.4E-05  | MTH_453  | conserved protein                                              | 2.6E-12  |
| MSM0772 | NONE     |                                                                                             |          | MTH_452  | unknown                                                        | 9.2E-07  |
| MSM0773 | Msp_0958 | predicted ABC-type polar amino acid transport system, ATP-binding protein                   | 1.4E-26  | MTH_1704 | cobalt transport ATP-binding protein O                         | 5.9E-25  |
| MSM0774 | Msp_0340 | PstB                                                                                        | 1.6E-26  | MTH_1731 | phosphate transport system ATP-binding                         | 5.2E-26  |
| MSM0775 | Msp_0149 | predicted transcriptional regulator                                                         | 2.0E-34  | NONE     |                                                                |          |
| MSM0776 | Msp_0790 | conserved hypothetical membrane-spanning protein                                            | 2.2E-138 | MTH_1909 | unknown                                                        | 2.8E-159 |
| MSM0777 | Msp_0491 | hypothetical membrane-spanning protein                                                      | 3.6E-10  | MTH_1908 | unknown                                                        | 3.2E-16  |
| MSM0778 | Msp_0517 | predicted RNA-binding protein                                                               | 3.6E-184 | MTH_1907 | conserved protein                                              | 2.0E-188 |
| MSM0779 | Msp_0516 | predicted Zn-dependent hydrolase of the beta-lactamase superfamily                          | 2.3E-70  | MTH_1902 | conserved protein                                              | 3.5E-72  |
| MSM0780 | NONE     |                                                                                             |          | MTH_1901 | unknown                                                        | 2.9E-16  |
| MSM0781 | Msp_1151 | hypothetical membrane-spanning protein                                                      | 1.2E-09  | MTH_1533 | unknown                                                        | 1.3E-10  |
| MSM0782 | Msp_1151 | hypothetical membrane-spanning protein                                                      | 2.4E-04  | MTH_979  | unknown                                                        | 1.2E-05  |
| MSM0783 | Msp_1447 | EhbK                                                                                        | 3.3E-20  | NONE     | tungsten formylmethanofuran dehydrogenase, subunit F homolog   | 3.5E-88  |
| MSM0784 | Msp_0236 | ferredoxin                                                                                  | 5.5E-14  | MTH_927  | ferredoxin                                                     | 5.1E-16  |
| MSM0785 | Msp_0514 | putative phosphopantetheine adenyllyltransferase                                            | 1.0E-37  | MTH_1896 | conserved protein                                              | 1.3E-42  |
| MSM0786 | Msp_1129 | partially conserved hypothetical membrane-spanning protein                                  | 1.1E-49  | MTH_412  | conserved protein                                              | 1.3E-69  |
| MSM0787 | Msp_0511 | predicted Fe-S oxidoreductase                                                               | 7.6E-120 | MTH_1895 | conserved protein                                              | 8.7E-124 |
| MSM0788 | Msp_0510 | putative aspartate aminotransferase                                                         | 5.5E-117 | MTH_1894 | aspartate aminotransferase homolog                             | 3.3E-108 |
| MSM0789 | Msp_0519 | predicted Co/Zn/Cd cation transporter                                                       | 7.6E-33  | MTH_1893 | cation efflux system protein (zinc/cadmium)                    | 1.8E-77  |
| MSM0790 | Msp_1428 | conserved hypothetical protein                                                              | 1.3E-15  | MTH_1884 | conserved protein                                              | 3.0E-36  |
| MSM0791 | Msp_0443 | 2-phosphoglycerate kinase                                                                   | 3.6E-81  | MTH_1883 | 2-phosphoglycerate kinase                                      | 3.7E-84  |
| MSM0792 | Msp_1010 | predicted phosphoesterase                                                                   | 1.8E-47  | MTH_1882 | conserved protein                                              | 2.3E-52  |
| MSM0793 | Msp_1011 | conserved hypothetical protein                                                              | 1.9E-29  | MTH_1881 | conserved protein                                              | 4.4E-42  |
| MSM0794 | Msp_1012 | conserved hypothetical protein                                                              | 1.9E-20  | MTH_1880 | conserved protein                                              | 2.1E-28  |
| MSM0795 | Msp_1013 | HdrB1                                                                                       | 1.9E-116 | NONE     | heterodisulfide reductase, subunit B                           | 4.3E-115 |
| MSM0796 | Msp_1014 | HdrC1                                                                                       | 1.6E-69  | NONE     | heterodisulfide reductase, subunit C                           | 4.7E-77  |
| MSM0797 | Msp_1015 | conserved hypothetical protein                                                              | 2.5E-50  | MTH_1877 | conserved protein                                              | 1.6E-53  |
| MSM0798 | NONE     |                                                                                             |          | NONE     |                                                                |          |
| MSM0799 | Msp_0113 | conserved hypothetical protein                                                              | 1.6E-12  | MTH_1626 | phosphoserine phosphatase                                      | 2.2E-06  |
| MSM0800 | NONE     |                                                                                             |          | NONE     |                                                                |          |
| MSM0801 | Msp_1017 | DphB                                                                                        | 1.7E-74  | MTH_1874 | diphthine synthase                                             | 2.9E-77  |
| MSM0802 | Msp_1022 | predicted methyltransferase                                                                 | 3.6E-81  | MTH_1873 | met-10+ protein                                                | 1.3E-74  |
| MSM0803 | NONE     |                                                                                             |          | MTH_633  | conserved protein                                              | 4.3E-04  |
| MSM0804 | Msp_1023 | putative translation initiation factor aIF-2B, subunit 1                                    | 5.0E-100 | NONE     | translation initiation factor eIF-2B, alpha subunit            | 2.2E-125 |
| MSM0805 | Msp_0958 | predicted ABC-type polar amino acid transport system, ATP-binding protein                   | 5.0E-100 | MTH_696  | ABC transporter (glutamine transport ATP-binding protein)      | 2.7E-35  |
| MSM0806 | Msp_0959 | predicted ABC-type polar amino acid transport system, permease protein                      | 2.1E-92  | NONE     |                                                                |          |
| MSM0807 | Msp_0960 | predicted ABC-type polar amino acid transport system, periplasmic substrate-binding protein | 3.5E-108 | NONE     |                                                                |          |
| MSM0808 | Msp_1024 | conserved hypothetical protein                                                              | 2.9E-104 | MTH_1871 | nitrogenase iron-molybdenum cofactor biosynthesis protein NifB | 1.6E-115 |
| MSM0809 | Msp_1025 | conserved hypothetical protein                                                              | 2.3E-40  | MTH_1870 | conserved protein                                              | 3.1E-41  |
| MSM0810 | Msp_1026 | predicted activator of 2-hydroxyglutaryl-CoA dehydratase                                    | 5.5E-165 | MTH_1869 | activator of (R)-2-hydroxyglutaryl-CoA                         | 1.7E-175 |
| MSM0811 | Msp_1027 | conserved hypothetical protein                                                              | 1.7E-53  | MTH_1868 | conserved protein                                              | 1.2E-57  |

|         |          |                                                                                        |          |          |                                                                         |          |
|---------|----------|----------------------------------------------------------------------------------------|----------|----------|-------------------------------------------------------------------------|----------|
| MSM0812 | Msp_1029 | conserved hypothetical protein                                                         | 1.3E-39  | MTH_1866 | conserved protein                                                       | 1.0E-40  |
| MSM0813 | Msp_1030 | predicted peptidyl-prolyl cis-trans isomerase                                          | 2.6E-135 | MTH_1865 | conserved protein                                                       | 2.3E-146 |
| MSM0814 | Msp_1032 | predicted selenophosphate synthetase-related protein                                   | 3.3E-87  | MTH_1864 | phosphoribosylformylglycinamide synthase II related protein             | 6.2E-91  |
| MSM0815 | Msp_1033 | conserved hypothetical protein                                                         | 4.5E-99  | MTH_1863 | conserved protein                                                       | 4.4E-97  |
| MSM0816 | Msp_1034 | predicted nucleic acid-binding protein                                                 | 3.7E-33  | MTH_1862 | conserved protein                                                       | 3.5E-40  |
| MSM0817 | Msp_0799 | predicted transcriptional regulator                                                    | 6.6E-34  | MTH_1843 | unknown                                                                 | 1.0E-33  |
| MSM0818 | Msp_0798 | predicted transcriptional regulator                                                    | 5.0E-36  | MTH_1843 | unknown                                                                 | 2.1E-26  |
| MSM0819 | NONE     |                                                                                        |          | MTH_1438 | unknown                                                                 | 4.6E-15  |
| MSM0820 | NONE     |                                                                                        |          | MTH_1861 | molybdenum cofactor biosynthesis MoaB                                   | 2.5E-46  |
| MSM0821 | Msp_1036 | PyrE                                                                                   | 3.1E-59  | MTH_1860 | uridine 5'-monophosphate synthase                                       | 5.2E-55  |
| MSM0822 | Msp_1035 | hypothetical protein                                                                   | 3.1E-13  | MTH_1859 | unknown                                                                 | 1.4E-15  |
| MSM0823 | NONE     |                                                                                        |          | NONE     |                                                                         |          |
| MSM0824 | NONE     |                                                                                        |          | NONE     | N-terminal acetyltransferase complex, subunit ARD1                      | 3.1E-06  |
| MSM0825 | Msp_0437 | conserved hypothetical protein                                                         | 4.7E-56  | NONE     |                                                                         |          |
| MSM0826 | Msp_0114 | ThsB                                                                                   | 8.2E-226 | MTH_794  | chaperonin                                                              | 2.4E-231 |
| MSM0827 | Msp_0747 | member of asn/thr-rich large protein family                                            | 5.9E-04  | MTH_796  | conserved protein                                                       | 4.5E-33  |
| MSM0828 | Msp_0220 | predicted glycosyltransferase                                                          | 2.0E-14  | MTH_540  | intracellular protein transport protein                                 | 8.1E-06  |
| MSM0829 | Msp_0110 | aspartate-semialdehyde dehydrogenase                                                   | 6.6E-121 | MTH_799  | aspartate-semialdehyde dehydrogenase                                    | 2.3E-132 |
| MSM0830 | Msp_0109 | DapB                                                                                   | 1.0E-85  | MTH_800  | dihydrodipicolinate reductase                                           | 3.2E-87  |
| MSM0831 | Msp_0108 | DapA                                                                                   | 4.9E-86  | MTH_801  | dihydrodipicolinate synthase                                            | 2.0E-85  |
| MSM0832 | Msp_0107 | putative aspartokinase                                                                 | 2.2E-129 | MTH_802  | aspartokinase II alpha subunit                                          | 6.7E-149 |
| MSM0833 | Msp_0106 | 30S ribosomal protein S17e                                                             | 1.3E-19  | MTH_803  | ribosomal protein S17                                                   | 1.5E-23  |
| MSM0834 | Msp_0105 | putative chorismate mutase                                                             | 3.8E-15  | NONE     | chorismate mutase, subunit A                                            | 9.3E-17  |
| MSM0835 | Msp_0104 | AroK                                                                                   | 4.7E-56  | MTH_805  | conserved protein (homoserine kinase related)                           | 2.6E-76  |
| MSM0836 | Msp_0101 | predicted glycosyltransferase                                                          | 2.6E-64  | MTH_450  | LPS biosynthesis RfbU related protein                                   | 9.6E-31  |
| MSM0837 | Msp_0102 | CbiD                                                                                   | 6.5E-91  | MTH_808  | cobalamin biosynthesis protein D                                        | 4.0E-87  |
| MSM0838 | Msp_0103 | putative thioredoxin                                                                   | 2.5E-18  | MTH_807  | thioredoxin                                                             | 7.1E-19  |
| MSM0839 | Msp_0100 | predicted helicase                                                                     | 2.1E-227 | MTH_810  | DNA helicase related protein                                            | 9.1E-248 |
| MSM0840 | Msp_0097 | conserved hypothetical protein                                                         | 3.0E-15  | MTH_814  | conserved protein                                                       | 1.6E-14  |
| MSM0841 | Msp_0371 | hypothetical protein                                                                   | 6.6E-11  | MTH_815  | unknown                                                                 | 2.2E-15  |
| MSM0842 | Msp_0372 | predicted histone acetyltransferase                                                    | 1.5E-187 | MTH_817  | conserved protein                                                       | 6.2E-189 |
| MSM0843 | NONE     |                                                                                        |          | MTH_818  | deoxyribose-phosphate aldolase                                          | 2.1E-26  |
| MSM0844 | Msp_0122 | archaeal histone                                                                       | 3.5E-21  | MTH_821  | histone HMTa1                                                           | 2.5E-23  |
| MSM0845 | Msp_0376 | predicted 2-methylthioadenine synthetase                                               | 8.9E-126 | MTH_826  | conserved protein                                                       | 3.8E-130 |
| MSM0846 | Msp_0375 | conserved hypothetical protein                                                         | 1.6E-39  | MTH_828  | conserved protein                                                       | 1.6E-46  |
| MSM0847 | Msp_0374 | LeuD2                                                                                  | 4.1E-57  | NONE     | 3-isopropylmalate dehydratase, LeuD subunit                             | 7.4E-56  |
| MSM0848 | Msp_0373 | predicted archaeal sugar kinase                                                        | 1.5E-73  | MTH_830  | conserved protein                                                       | 3.0E-82  |
| MSM0849 | Msp_0384 | predicted Fe-S oxidoreductase                                                          | 6.6E-169 | MTH_831  | molybdenum cofactor biosynthesis MoaA homolog                           | 2.7E-177 |
| MSM0850 | Msp_0385 | conserved hypothetical membrane-spanning protein                                       | 2.4E-45  | MTH_832  | conserved protein                                                       | 1.4E-43  |
| MSM0851 | Msp_0386 | predicted transcriptional regulator                                                    | 1.1E-70  | MTH_834  | conserved protein                                                       | 3.0E-98  |
| MSM0852 | Msp_0387 | predicted ATP-utilizing enzyme                                                         | 2.3E-40  | MTH_835  | conserved protein                                                       | 1.0E-53  |
| MSM0853 | Msp_0217 | predicted UDP-N-acetylglucosamine 2-epimerase                                          | 1.4E-120 | MTH_837  | UDP-N-acetylglucosamine 2-epimerase                                     | 1.3E-136 |
| MSM0854 | NONE     |                                                                                        |          | NONE     |                                                                         |          |
| MSM0855 | Msp_0388 | TruA                                                                                   | 5.2E-50  | MTH_840  | pseudouridylate synthase I                                              | 1.6E-51  |
| MSM0856 | NONE     |                                                                                        |          | MTH_695  | conserved protein                                                       | 1.7E-08  |
| MSM0857 | Msp_1000 | predicted ABC-type nitrate/sulfonate/bicarbonate transport system, ATB-binding protein | 1.5E-29  | MTH_696  | ABC transporter (glutamine transport ATP-binding protein)               | 3.3E-44  |
| MSM0858 | Msp_0389 | HisA                                                                                   | 6.3E-77  | MTH_843  | phosphoribosylformimino-5-aminoimidazole carboxamide ribotide isomerase | 7.4E-79  |
| MSM0859 | Msp_0390 | putative cytidylyltransferase                                                          | 5.1E-43  | MTH_844  | autotrophic growth protein                                              | 1.5E-48  |

|         |          |                                                             |          |          |                                                                |          |
|---------|----------|-------------------------------------------------------------|----------|----------|----------------------------------------------------------------|----------|
| MSM0860 | Msp_0552 | ArgC                                                        | 4.9E-109 | MTH_846  | N-acetyl-gamma-glutamyl-phosphate reductase                    | 2.0E-108 |
| MSM0861 | Msp_0554 | hypothetical protein                                        | 4.8E-31  | MTH_847  | unknown                                                        | 3.3E-44  |
| MSM0862 | Msp_0521 | Pyrl                                                        | 2.1E-44  | MTH_850  | aspartate carbamoyltransferase regulatory subunit              | 7.5E-47  |
| MSM0863 | Msp_1419 | hypothetical protein                                        | 3.1E-20  | NONE     |                                                                |          |
| MSM0864 | NONE     |                                                             |          | MTH_1285 | conserved protein                                              | 2.7E-10  |
| MSM0865 | Msp_0159 | conserved hypothetical protein                              | 1.1E-79  | MTH_853  | conserved protein                                              | 2.4E-96  |
| MSM0866 | Msp_0402 | predicted zinc metalloprotease                              | 4.7E-143 | MTH_856  | zinc metalloproteinase                                         | 8.2E-144 |
| MSM0867 | Msp_0403 | conserved hypothetical protein                              | 1.1E-47  | MTH_857  | conserved protein                                              | 4.0E-48  |
| MSM0868 | NONE     |                                                             |          | NONE     |                                                                |          |
| MSM0869 | Msp_0404 | predicted GTPase                                            | 3.0E-93  | NONE     | GTP-binding protein, GTP1/OBG family                           | 8.2E-112 |
| MSM0870 | Msp_0405 | putative small heat shock protein                           | 1.2E-16  | NONE     | heat shock protein, class I                                    | 3.8E-20  |
| MSM0871 | Msp_0017 | conserved hypothetical protein                              | 1.7E-28  | NONE     |                                                                |          |
| MSM0872 | Msp_1054 | predicted phosphosugar isomerase                            | 1.2E-103 | MTH_860  | glucosamine--fructose-6-phosphate aminotransferase             | 5.6E-113 |
| MSM0873 | Msp_1309 | conserved hypothetical protein                              | 7.6E-17  | MTH_863  | conserved protein                                              | 5.4E-28  |
| MSM0874 | Msp_1308 | adenine deaminase                                           | 1.5E-139 | MTH_866  | adenine deaminase                                              | 1.3E-132 |
| MSM0875 | Msp_1347 | conserved hypothetical protein                              | 6.0E-136 | MTH_867  | conserved protein                                              | 6.4E-144 |
| MSM0876 | Msp_0415 | predicted arginase/agmatinase/formimionoglutamate hydrolase | 1.3E-71  | MTH_868  | agmatine ureohydrolase                                         | 1.2E-73  |
| MSM0877 | Msp_1352 | translation initiation factor 5A (aIF-5A)                   | 4.4E-53  | NONE     | translation initiation factor, eIF-5A                          | 1.7E-49  |
| MSM0878 | Msp_1327 | PdaD                                                        | 2.1E-37  | MTH_870  | conserved protein                                              | 3.4E-42  |
| MSM0879 | Msp_1330 | PpnK                                                        | 7.2E-60  | MTH_872  | conserved protein                                              | 9.0E-77  |
| MSM0880 | Msp_1331 | predicted UDP-N-acetylmuramyl pentapeptide synthase         | 1.1E-47  | MTH_873  | UDP-N-acetylmuramyl tripeptide synthetase related protein      | 5.4E-81  |
| MSM0881 | Msp_1332 | HemC                                                        | 7.3E-83  | MTH_874  | porphobilinogen deaminase                                      | 2.0E-85  |
| MSM0882 | Msp_1333 | predicted dehydrogenase                                     | 2.7E-101 | NONE     | 3-chlorobenzoate-3,4-dioxygenase dyhydrogenase related protein | 3.0E-130 |
| MSM0883 | Msp_1334 | predicted orotate phosphoribosyltransferase                 | 5.6E-53  | MTH_876  | orotate phosphoribosyltransferase                              | 9.7E-70  |
| MSM0884 | Msp_0747 | member of asn/thr-rich large protein family                 | 1.5E-18  | MTH_716  | cell surface glycoprotein (s-layer protein)                    | 4.1E-07  |
| MSM0885 | Msp_1465 | member of asn/thr-rich large protein family                 | 2.4E-39  | MTH_716  | cell surface glycoprotein (s-layer protein)                    | 1.7E-08  |
| MSM0886 | NONE     |                                                             |          | NONE     |                                                                |          |
| MSM0887 | Msp_1410 | predicted universal stress protein                          | 2.5E-18  | MTH_898  | conserved protein                                              | 1.5E-18  |
| MSM0888 | Msp_1416 | GdhA                                                        | 2.6E-181 | NONE     |                                                                |          |
| MSM0889 | NONE     |                                                             |          | NONE     |                                                                |          |
| MSM0890 | NONE     |                                                             |          | NONE     |                                                                |          |
| MSM0891 | Msp_1363 | peptide chain release factor, subunit 1 (aRF-1)             | 3.4E-149 | NONE     | peptide chain release factor eRF, subunit 1                    | 8.7E-156 |
| MSM0892 | Msp_1056 | hypothetical membrane-spanning protein                      | 5.4E-06  | MTH_1905 | unknown                                                        | 3.2E-06  |
| MSM0893 | Msp_1202 | predicted acetyltransferase                                 | 2.4E-29  | NONE     | N-terminal acetyltransferase complex, subunit ARD1             | 3.7E-38  |
| MSM0894 | Msp_1203 | conserved hypothetical protein                              | 5.7E-28  | MTH_1000 | conserved protein                                              | 1.2E-25  |
| MSM0895 | Msp_1204 | predicted cation transport ATPase                           | 3.9E-235 | MTH_1001 | cation-transporting P-ATPase PacL                              | 9.8E-251 |
| MSM0896 | Msp_1205 | CbiJ                                                        | 6.5E-43  | MTH_1002 | cobalamin biosynthesis protein J                               | 8.5E-39  |
| MSM0897 | Msp_1365 | 30S ribosomal protein S10P                                  | 1.6E-48  | MTH_1059 | ribosomal protein S20 (E.coli )                                | 1.3E-49  |
| MSM0898 | Msp_1366 | translation elongation factor 1-alpha (EF-Tu)               | 1.9E-185 | NONE     | translation elongation factor, EF-1 alpha                      | 3.9E-192 |
| MSM0899 | Msp_1367 | FusA                                                        | 1.7E-319 | NONE     | translation elongation factor, EF-2                            | 1.9E-318 |
| MSM0900 | Msp_1368 | 30S ribosomal protein S7P                                   | 3.3E-80  | MTH_1056 | ribosomal protein S5 (E.coli )                                 | 9.2E-81  |
| MSM0901 | Msp_1369 | 30S ribosomal protein S12P                                  | 4.4E-69  | MTH_1055 | ribosomal protein S23 (E.coli )                                | 7.8E-68  |
| MSM0902 | Msp_0321 | MrtA                                                        | 5.7E-250 | NONE     | methyl coenzyme M reductase II, alpha subunit                  | 2.0E-250 |
| MSM0903 | Msp_0320 | MrtG                                                        | 1.6E-103 | NONE     | methyl coenzyme M reductase II, gamma subunit                  | 1.8E-116 |
| MSM0904 | Msp_0319 | MrtD                                                        | 1.9E-45  | NONE     | methyl coenzyme M reductase II, D protein                      | 2.2E-40  |
| MSM0905 | Msp_0318 | MrtB                                                        | 9.8E-159 | NONE     | methyl coenzyme M reductase II, beta subunit                   | 4.1E-181 |
| MSM0906 | Msp_1370 | NusA                                                        | 1.7E-44  | MTH_1054 | transcription termination factor NusA                          | 2.5E-55  |
| MSM0907 | Msp_1371 | 50S ribosomal protein L30e                                  | 6.0E-33  | MTH_1053 | ribosomal protein L30                                          | 3.0E-36  |
| MSM0908 | Msp_1372 | RpoA2                                                       | 2.1E-126 | NONE     | DNA-dependent RNA polymerase, subunit A''                      | 4.7E-141 |

|         |          |                                                            |          |          |                                                                    |          |
|---------|----------|------------------------------------------------------------|----------|----------|--------------------------------------------------------------------|----------|
| MSM0909 | Msp_1373 | RpoA1                                                      | 0.0E+00  | NONE     | DNA-dependent RNA polymerase, subunit A'                           | 0.0E+00  |
| MSM0910 | Msp_1374 | RpoB1                                                      | 6.1E-253 | NONE     | DNA-dependent RNA polymerase, subunit B'                           | 4.6E-276 |
| MSM0911 | Msp_1375 | RpoB2                                                      | 3.3E-103 | NONE     | DNA-dependent RNA polymerase, subunit B''                          | 8.6E-220 |
| MSM0912 | Msp_1376 | RpoH                                                       | 7.6E-17  | NONE     | DNA-dependent RNA polymerase, subunit H                            | 4.6E-15  |
| MSM0913 | NONE     |                                                            |          | NONE     |                                                                    |          |
| MSM0914 | NONE     |                                                            |          | MTH_72   | O-linked GlcNAc transferase                                        | 3.0E-04  |
| MSM0915 | NONE     |                                                            |          | NONE     |                                                                    |          |
| MSM0916 | Msp_0682 | ThiM1                                                      | 1.2E-73  | NONE     |                                                                    |          |
| MSM0917 | Msp_0683 | hypothetical protein                                       | 7.7E-56  | NONE     |                                                                    |          |
| MSM0918 | Msp_1381 | phosphoglycerate kinase                                    | 1.1E-120 | MTH_1042 | 3-phosphoglycerate kinase                                          | 4.3E-131 |
| MSM0919 | Msp_1382 | TpiA                                                       | 4.9E-77  | MTH_1041 | triosephosphate isomerase                                          | 3.2E-71  |
| MSM0920 | Msp_1103 | member of asn/thr-rich large protein family                | 4.2E-04  | NONE     |                                                                    |          |
| MSM0921 | Msp_0548 | hypothetical membrane-spanning protein                     | 1.1E-05  | NONE     |                                                                    |          |
| MSM0922 | Msp_1383 | predicted Fe-S oxidoreductase                              | 1.7E-97  | MTH_1039 | conserved protein                                                  | 4.9E-98  |
| MSM0923 | Msp_0540 | predicted multimeric flavodoxin                            | 1.2E-16  | MTH_135  | conserved protein                                                  | 1.3E-17  |
| MSM0924 | Msp_1386 | SucC                                                       | 3.4E-101 | NONE     | succinyl-CoA synthetase, beta subunit                              | 3.7E-116 |
| MSM0925 | Msp_1387 | KorC                                                       | 9.5E-58  | NONE     | 2-oxoglutarate oxidoreductase, gamma subunit                       | 8.8E-60  |
| MSM0926 | Msp_1388 | KorB                                                       | 1.3E-99  | NONE     | 2-oxoglutarate oxidoreductase, beta subunit                        | 2.2E-102 |
| MSM0927 | Msp_1389 | KorA                                                       | 4.5E-138 | NONE     | 2-oxoglutarate oxidoreductase, alpha subunit                       | 6.2E-130 |
| MSM0928 | Msp_1390 | KorD                                                       | 3.0E-15  | NONE     | ferredoxin (putative 2-oxoglutarate oxidoreductase, delat subunit) | 8.6E-14  |
| MSM0929 | Msp_0791 | fumarate hydratase                                         | 3.7E-17  | NONE     | fumarate hydratase, class I                                        | 3.5E-40  |
| MSM0930 | Msp_0325 | predicted peptidyl-prolyl cis-trans isomerase 2            | 3.5E-67  | MTH_1125 | fkbp-type peptidyl-prolyl cis-trans isomerase                      | 1.8E-77  |
| MSM0931 | Msp_0801 | conserved hypothetical protein                             | 7.0E-94  | MTH_448  | unknown                                                            | 4.8E-68  |
| MSM0932 | Msp_1167 | conserved hypothetical protein                             | 4.7E-49  | MTH_1113 | conserved protein                                                  | 1.6E-58  |
| MSM0933 | Msp_1168 | CobS                                                       | 1.2E-50  | MTH_1112 | cobalamin (5'-phosphate) synthase                                  | 1.9E-41  |
| MSM0934 | Msp_1169 | hypothetical protein                                       | 1.1E-06  | MTH_1111 | conserved protein                                                  | 1.5E-41  |
| MSM0935 | Msp_1170 | conserved hypothetical protein                             | 4.5E-106 | MTH_1109 | conserved protein                                                  | 4.2E-92  |
| MSM0936 | Msp_1171 | predicted ATPase                                           | 6.3E-77  | MTH_1108 | conserved protein                                                  | 1.0E-65  |
| MSM0937 | NONE     |                                                            |          | NONE     |                                                                    |          |
| MSM0938 | NONE     |                                                            |          | NONE     |                                                                    |          |
| MSM0939 | Msp_1173 | PycB                                                       | 1.4E-212 | NONE     | oxaloacetate decarboxylase, alpha subunit                          | 2.8E-221 |
| MSM0940 | Msp_1166 | predicted myo-inositol-1-phosphate synthase                | 5.3E-151 | MTH_1105 | conserved protein                                                  | 9.4E-159 |
| MSM0941 | Msp_0634 | predicted prenyltransferase                                | 2.3E-70  | MTH_1098 | bacteriochlorophyll synthase related protein                       | 4.2E-69  |
| MSM0942 | Msp_0616 | partially conserved hypothetical membrane-spanning protein | 5.0E-52  | MTH_371  | unknown                                                            | 5.1E-35  |
| MSM0943 | NONE     |                                                            |          | MTH_466  | unknown                                                            | 5.6E-09  |
| MSM0944 | NONE     |                                                            |          | NONE     |                                                                    |          |
| MSM0945 | Msp_1285 | hydrogenase expression/formation protein                   | 9.3E-147 | MTH_1072 | hydrogenase expression/formation protein HypD                      | 2.2E-141 |
| MSM0946 | Msp_0215 | predicted glycosyltransferase                              | 6.1E-04  | MTH_1071 | conserved protein                                                  | 3.9E-50  |
| MSM0947 | Msp_1284 | predicted modulator of DNA gyrase                          | 3.7E-95  | MTH_1070 | conserved protein                                                  | 1.5E-96  |
| MSM0948 | Msp_0220 | predicted glycosyltransferase                              | 4.0E-04  | NONE     |                                                                    |          |
| MSM0949 | Msp_1351 | predicted transcriptional activator                        | 6.7E-18  | MTH_628  | unknown                                                            | 1.6E-19  |
| MSM0950 | NONE     |                                                            |          | MTH_1003 | molybdenum cofactor biosynthesis protein MoeA                      | 6.8E-101 |
| MSM0951 | Msp_1335 | translation initiation factor 1A (aIF-1A) (eIF1A)          | 1.6E-41  | NONE     | translation initiation factor, eIF-1A                              | 1.3E-44  |
| MSM0952 | Msp_1337 | predicted serine/threonine protein kinase                  | 5.1E-59  | MTH_1005 | conserved protein                                                  | 1.1E-75  |
| MSM0953 | NONE     |                                                            |          | MTH_630  | unknown                                                            | 1.5E-04  |
| MSM0954 | Msp_1338 | predicted RNA-binding protein                              | 1.4E-56  | MTH_1006 | conserved protein                                                  | 2.0E-60  |
| MSM0955 | Msp_1339 | type II DNA topoisomerase VI, subunit B                    | 2.4E-203 | MTH_1007 | conserved protein                                                  | 1.5E-213 |
| MSM0956 | Msp_1340 | type II DNA topoisomerase VI, subunit A                    | 4.3E-149 | MTH_1008 | conserved protein                                                  | 1.8E-155 |
| MSM0957 | Msp_0119 | hypothetical membrane-spanning protein                     | 6.8E-20  | MTH_524  | unknown                                                            | 4.9E-35  |

|         |          |                                                                                        |          |          |                                                     |          |
|---------|----------|----------------------------------------------------------------------------------------|----------|----------|-----------------------------------------------------|----------|
| MSM0958 | Msp_1110 | CobN                                                                                   | 5.3E-11  | MTH_515  | unknown                                             | 1.1E-08  |
| MSM0959 | Msp_0994 | conserved hypothetical protein                                                         | 3.0E-31  | NONE     |                                                     |          |
| MSM0960 | Msp_0678 | predicted cation transport ATPase                                                      | 4.8E-134 | MTH_411  | cadmium efflux ATPase                               | 1.9E-80  |
| MSM0961 | Msp_0224 | predicted cation transport ATPase                                                      | 9.6E-07  | MTH_1535 | heavy-metal transporting CPx-type ATPase            | 1.4E-08  |
| MSM0962 | Msp_1346 | glyceraldehyde 3-phosphate dehydrogenase                                               | 4.7E-127 | MTH_1009 | glyceraldehyde 3-phosphate dehydrogenase            | 5.9E-134 |
| MSM0963 | Msp_0992 | putative endonuclease IV                                                               | 9.5E-06  | MTH_1010 | endonuclease IV                                     | 6.6E-71  |
| MSM0964 | Msp_1349 | predicted phosphohydrolase                                                             | 8.0E-19  | MTH_1179 | conserved protein                                   | 1.1E-38  |
| MSM0965 | Msp_0718 | predicted 3-hydroxyacyl-CoA dehydrogenase                                              | 2.6E-126 | NONE     |                                                     |          |
| MSM0966 | Msp_1415 | putative 26S protease, regulatory subunit                                              | 6.5E-107 | MTH_1011 | ATP-dependent 26S protease regulatory subunit 8     | 7.4E-111 |
| MSM0967 | Msp_1408 | HemA                                                                                   | 4.6E-90  | MTH_1012 | glutamyl-tRNA reductase                             | 3.2E-94  |
| MSM0968 | Msp_1407 | predicted siroheme synthase                                                            | 2.4E-45  | MTH_1013 | conserved protein                                   | 1.9E-41  |
| MSM0969 | Msp_1406 | predicted metal-binding transcription factor                                           | 4.9E-54  | MTH_1014 | conserved protein                                   | 5.6E-58  |
| MSM0970 | Msp_0784 | hypothetical protein                                                                   | 1.3E-21  | NONE     |                                                     |          |
| MSM0971 | Msp_0393 | methyl-coenzyme M reductase, component A2                                              | 7.6E-191 | NONE     | methyl coenzyme M reductase system, component A2    | 4.3E-209 |
| MSM0972 | Msp_1405 | conserved hypothetical protein                                                         | 1.3E-46  | MTH_1016 | conserved protein                                   | 5.5E-51  |
| MSM0973 | Msp_1404 | putative GTP cyclohydrolase III                                                        | 9.2E-76  | MTH_1017 | conserved protein                                   | 1.3E-88  |
| MSM0974 | Msp_1403 | CofD                                                                                   | 3.6E-90  | MTH_1018 | conserved protein                                   | 8.0E-98  |
| MSM0975 | Msp_1402 | CofE                                                                                   | 3.8E-63  | MTH_1019 | conserved protein                                   | 1.6E-76  |
| MSM0976 | Msp_1398 | PurO                                                                                   | 2.8E-51  | MTH_1020 | conserved protein                                   | 1.0E-51  |
| MSM0977 | Msp_1397 | conserved hypothetical membrane-spanning protein                                       | 3.7E-24  | MTH_1021 | unknown                                             | 3.2E-30  |
| MSM0978 | Msp_1396 | predicted biopolymer transport protein                                                 | 1.5E-77  | MTH_1022 | biopolymer transport protein                        | 4.1E-94  |
| MSM0979 | Msp_1395 | RnhB                                                                                   | 1.6E-48  | MTH_1023 | ribonuclease HII                                    | 9.8E-61  |
| MSM0980 | Msp_1517 | DnaK                                                                                   | 5.3E-16  | MTH_1024 | rod shape-determining protein                       | 7.3E-136 |
| MSM0981 | NONE     |                                                                                        |          | MTH_1025 | unknown                                             | 2.6E-51  |
| MSM0982 | Msp_1394 | partially conserved hypothetical membrane-spanning protein                             | 2.4E-38  | MTH_1027 | CDP-diacylglycerol-serine O-phosphatidyltransferase | 8.2E-41  |
| MSM0983 | Msp_1393 | conserved hypothetical membrane-spanning protein                                       | 8.7E-48  | MTH_1028 | unknown                                             | 1.7E-70  |
| MSM0984 | NONE     |                                                                                        |          | MTH_1030 | unknown                                             | 1.4E-45  |
| MSM0985 | Msp_1392 | conserved hypothetical protein                                                         | 1.1E-29  | MTH_1031 | conserved protein                                   | 6.3E-34  |
| MSM0986 | Msp_0760 | putative bile salt acid hydrolase                                                      | 4.3E-110 | NONE     |                                                     |          |
| MSM0987 | Msp_0329 | MfnA                                                                                   | 3.9E-100 | MTH_1116 | glutamate decarboxylase                             | 6.1E-123 |
| MSM0988 | Msp_0328 | PpsA                                                                                   | 1.7E-273 | MTH_1118 | phosphoenolpyruvate synthase                        | 2.0E-250 |
| MSM0989 | Msp_0327 | 50S ribosomal protein L10e                                                             | 2.8E-58  | MTH_1119 | ribosomal protein L10                               | 2.1E-65  |
| MSM0990 | Msp_1000 | predicted ABC-type nitrate/sulfonate/bicarbonate transport system, ATB-binding protein | 4.7E-40  | MTH_920  | anion permease                                      | 4.2E-37  |
| MSM0991 | Msp_1001 | predicted ABC-type nitrate/sulfonate/bicarbonate transport system, permease protein    | 2.4E-11  | MTH_478  | sulfate transport system permease protein           | 4.1E-09  |
| MSM0992 | Msp_0326 | hypothetical protein                                                                   | 1.0E-12  | MTH_1121 | unknown                                             | 8.9E-12  |
| MSM0993 | Msp_0601 | partially conserved hypothetical protein, predicted GTPase                             | 3.9E-04  | MTH_1123 | unknown                                             | 1.9E-15  |
| MSM0994 | Msp_0324 | predicted nucleotidyltransferase                                                       | 3.4E-101 | MTH_1126 | conserved protein                                   | 2.7E-90  |
| MSM0995 | Msp_0590 | member of asn/thr-rich large protein family                                            | 8.7E-33  | MTH_716  | cell surface glycoprotein (s-layer protein)         | 1.3E-09  |
| MSM0996 | Msp_0983 | member of asn/thr-rich large protein family                                            | 2.6E-26  | MTH_716  | cell surface glycoprotein (s-layer protein)         | 1.1E-09  |
| MSM0997 | Msp_0323 | PyrC                                                                                   | 1.1E-97  | MTH_1127 | dihydroorotase                                      | 7.8E-100 |
| MSM0998 | Msp_1447 | EhbK                                                                                   | 1.0E-30  | MTH_1133 | polyferredoxin (MvhB)                               | 4.4E-145 |
| MSM0999 | Msp_0316 | MvhA                                                                                   | 3.4E-181 | NONE     | methyl viologen-reducing hydrogenase, alpha subunit | 2.1E-207 |
| MSM1000 | Msp_0315 | MvhG                                                                                   | 3.2E-128 | NONE     | methyl viologen-reducing hydrogenase, gamma subunit | 5.5E-138 |
| MSM1001 | Msp_0314 | MvhD1                                                                                  | 3.9E-61  | NONE     | methyl viologen-reducing hydrogenase, delta subunit | 1.6E-67  |
| MSM1002 | Msp_0312 | conserved hypothetical protein                                                         | 1.2E-130 | MTH_1150 | ABC transporter subunit Ycf24                       | 3.5E-152 |
| MSM1003 | Msp_0313 | predicted ABC-type transport system                                                    | 3.2E-82  | MTH_1149 | ABC transporter subunit Ycf16                       | 8.0E-98  |
| MSM1004 | Msp_0311 | conserved hypothetical protein                                                         | 1.2E-27  | MTH_1151 | unknown                                             | 9.3E-33  |

|         |          |                                                                |          |          |                                                                           |          |
|---------|----------|----------------------------------------------------------------|----------|----------|---------------------------------------------------------------------------|----------|
| MSM1005 | Msp_0310 | predicted GTP:adenosylcobinamide-phosphate guanylyltransferase | 4.0E-36  | MTH_1152 | conserved protein                                                         | 7.0E-35  |
| MSM1006 | Msp_0308 | conserved hypothetical protein                                 | 2.2E-90  | MTH_1153 | conserved protein                                                         | 5.2E-165 |
| MSM1007 | Msp_0307 | MtrH                                                           | 2.1E-108 | MTH_1156 | N5-methyl-tetrahydromethanopterin:coenzyme M methyltransferase, subunit H | 2.9E-125 |
| MSM1008 | Msp_0306 | MtrG                                                           | 5.7E-12  | MTH_1157 | N5-methyl-tetrahydromethanopterin:coenzyme M methyltransferase, subunit G | 4.2E-21  |
| MSM1009 | Msp_0305 | MtrF                                                           | 5.5E-07  | MTH_1158 | N5-methyl-tetrahydromethanopterin:coenzyme M methyltransferase, subunit F | 9.3E-17  |
| MSM1010 | Msp_0304 | MtrA                                                           | 9.0E-62  | MTH_1159 | N5-methyl-tetrahydromethanopterin:coenzyme M methyltransferase, subunit A | 9.8E-93  |
| MSM1011 | Msp_0303 | MtrB                                                           | 1.0E-12  | MTH_1160 | N5-methyl-tetrahydromethanopterin:coenzyme M methyltransferase, subunit B | 1.7E-31  |
| MSM1012 | Msp_0302 | MtrC                                                           | 7.6E-49  | MTH_1161 | N5-methyl-tetrahydromethanopterin:coenzyme M methyltransferase, subunit C | 7.2E-81  |
| MSM1013 | Msp_0301 | MtrD                                                           | 2.0E-57  | MTH_1162 | N5-methyl-tetrahydromethanopterin:coenzyme M methyltransferase, subunit D | 1.0E-81  |
| MSM1014 | Msp_0300 | MtrE                                                           | 9.5E-74  | MTH_1163 | N5-methyl-tetrahydromethanopterin:coenzyme M methyltransferase, subunit E | 1.5E-121 |
| MSM1015 | Msp_0321 | MrtA                                                           | 7.6E-207 | NONE     | methyl coenzyme M reductase I, alpha subunit                              | 1.7E-253 |
| MSM1016 | Msp_0320 | MrtG                                                           | 6.2E-86  | NONE     | methyl coenzyme M reductase I, gamma subunit                              | 2.9E-109 |
| MSM1017 | Msp_0299 | McrC                                                           | 2.8E-67  | NONE     | methyl coenzyme M reductase I, C protein                                  | 2.6E-83  |
| MSM1018 | Msp_0319 | MrtD                                                           | 7.4E-19  | NONE     | methyl coenzyme M reductase I, D protein                                  | 1.1E-34  |
| MSM1019 | Msp_0318 | MrtB                                                           | 1.6E-133 | NONE     | methyl coenzyme M reductase I, beta subunit                               | 3.4E-177 |
| MSM1020 | Msp_0298 | predicted Fe-S oxidoreductase                                  | 2.0E-119 | MTH_1170 | conserved protein                                                         | 1.7E-136 |
| MSM1021 | Msp_0284 | conserved hypothetical protein                                 | 1.7E-99  | MTH_1180 | conserved protein                                                         | 6.7E-117 |
| MSM1022 | Msp_0285 | conserved hypothetical protein                                 | 8.5E-34  | MTH_1181 | unknown                                                                   | 2.0E-23  |
| MSM1023 | Msp_0973 | ComB2                                                          | 1.3E-44  | MTH_1182 | conserved protein                                                         | 2.7E-42  |
| MSM1024 | Msp_0287 | conserved hypothetical membrane-spanning protein               | 1.9E-98  | MTH_1183 | pheromone shutdown protein TraB                                           | 4.4E-58  |
| MSM1025 | Msp_0288 | hypothetical protein                                           | 1.5E-20  | MTH_1184 | unknown                                                                   | 3.0E-20  |
| MSM1026 | NONE     |                                                                |          | MTH_1224 | inosine-5'-monophosphate dehydrogenase related protein III                | 5.6E-04  |
| MSM1027 | NONE     |                                                                |          | MTH_1155 | Na <sup>+</sup> /Ca <sup>+</sup> exchanging protein related               | 2.1E-42  |
| MSM1028 | Msp_0289 | predicted ATPase                                               | 9.5E-74  | MTH_1186 | conserved protein                                                         | 2.0E-85  |
| MSM1029 | Msp_0693 | conserved hypothetical protein                                 | 1.3E-39  | MTH_1187 | conserved protein                                                         | 3.2E-23  |
| MSM1030 | Msp_0290 | predicted pyridoxal phosphate-dependent enzyme                 | 1.3E-124 | MTH_1188 | pleiotropic regulatory protein DegT                                       | 6.1E-123 |
| MSM1031 | Msp_0291 | N2,N2-dimethylguanosine tRNA methyltransferase                 | 1.1E-109 | NONE     | N2,N2-dimethylguanosine tRNA methyltransferase                            | 4.1E-110 |
| MSM1032 | Msp_0293 | predicted transcriptional regulator                            | 9.3E-44  | MTH_1193 | transcriptional regulator                                                 | 2.9E-52  |
| MSM1033 | Msp_0294 | conserved hypothetical protein                                 | 1.8E-109 | MTH_1196 | conserved protein                                                         | 7.7E-116 |
| MSM1034 | Msp_0295 | conserved hypothetical protein                                 | 6.0E-17  | MTH_1197 | conserved protein                                                         | 1.1E-22  |
| MSM1035 | Msp_0296 | CofG                                                           | 4.2E-96  | MTH_1198 | biotin synthetase related protein                                         | 6.4E-105 |
| MSM1036 | Msp_0297 | predicted methyltransferase                                    | 2.3E-70  | MTH_1200 | met-10+ related protein                                                   | 5.7E-72  |
| MSM1037 | Msp_0282 | PsmB                                                           | 7.5E-58  | NONE     | proteasome, beta subunit                                                  | 7.8E-68  |
| MSM1038 | Msp_0281 | predicted exonuclease                                          | 5.4E-245 | MTH_1203 | cleavage and polyadenylation specificity factor                           | 3.5E-278 |
| MSM1039 | Msp_0280 | PurM                                                           | 1.6E-103 | MTH_1204 | phosphoribosylformylglycinamide cyclo-ligase                              | 4.0E-112 |
| MSM1040 | Msp_0279 | ComC                                                           | 7.6E-104 | MTH_1205 | malate dehydrogenase                                                      | 5.7E-104 |
| MSM1041 | Msp_1507 | putative DNA polymerase                                        | 6.8E-167 | MTH_1208 | DNA-dependent DNA polymerase family B (PolB1)                             | 5.1E-183 |
| MSM1042 | NONE     |                                                                |          | MTH_1211 | conserved protein                                                         | 4.0E-71  |
| MSM1043 | Msp_1420 | PyrK                                                           | 4.4E-69  | NONE     | cytochrome-c3 hydrogenase, gamma subunit                                  | 1.6E-74  |
| MSM1044 | Msp_1421 | PyrD                                                           | 7.4E-90  | MTH_1213 | dihydroorotate oxidase                                                    | 1.3E-106 |
| MSM1045 | Msp_0220 | predicted glycosyltransferase                                  | 1.9E-12  | MTH_1626 | phosphoserine phosphatase                                                 | 2.4E-05  |

|         |          |                                                                |          |          |                                                            |          |
|---------|----------|----------------------------------------------------------------|----------|----------|------------------------------------------------------------|----------|
| MSM1046 | Msp_1422 | predicted ribosomal biogenesis protein                         | 1.2E-89  | MTH_1214 | pre-mRNA splicing protein PRP31                            | 1.4E-88  |
| MSM1047 | Msp_1423 | FfpA                                                           | 5.3E-64  | MTH_1215 | fibrillar-like pre-rRNA processing protein                 | 2.5E-62  |
| MSM1048 | Msp_1424 | predicted phosphopantothenoilcysteine synthetase/decarboxylase | 1.9E-43  | MTH_1216 | pantothenate metabolism flavoprotein                       | 2.3E-52  |
| MSM1049 | Msp_1424 | predicted phosphopantothenoilcysteine synthetase/decarboxylase | 2.0E-55  | MTH_1216 | pantothenate metabolism flavoprotein                       | 2.2E-54  |
| MSM1050 | Msp_1425 | conserved hypothetical membrane-spanning protein               | 4.7E-11  | MTH_1218 | unknown                                                    | 3.3E-21  |
| MSM1051 | Msp_1426 | hypothetical membrane-spanning protein                         | 3.5E-05  | MTH_1219 | unknown                                                    | 9.0E-19  |
| MSM1052 | Msp_1427 | PheA                                                           | 2.5E-59  | MTH_1220 | chorismate mutase                                          | 1.1E-70  |
| MSM1053 | Msp_1428 | conserved hypothetical protein                                 | 4.4E-60  | MTH_1222 | inosine-5'-monophosphate dehydrogenase related protein I   | 4.5E-72  |
| MSM1054 | Msp_1429 | conserved hypothetical protein                                 | 2.2E-74  | MTH_1224 | inosine-5'-monophosphate dehydrogenase related protein III | 1.3E-83  |
| MSM1055 | Msp_1431 | partially conserved hypothetical protein                       | 1.9E-36  | MTH_1227 | coenzyme PQQ synthesis protein III                         | 1.9E-57  |
| MSM1056 | Msp_1432 | putative 6-pyruvoyl tetrahydrobiopterin synthase               | 1.4E-38  | MTH_1228 | conserved protein                                          | 4.6E-47  |
| MSM1057 | Msp_1433 | conserved hypothetical protein                                 | 2.1E-53  | MTH_1229 | conserved protein                                          | 2.1E-49  |
| MSM1058 | Msp_1434 | conserved hypothetical protein                                 | 5.6E-85  | MTH_1231 | conserved protein                                          | 1.1E-95  |
| MSM1059 | Msp_0945 | predicted RecB family exonuclease                              | 1.2E-06  | MTH_1233 | unknown                                                    | 1.4E-36  |
| MSM1060 | Msp_1436 | EhbQ                                                           | 4.9E-61  | MTH_1235 | conserved protein                                          | 1.2E-69  |
| MSM1061 | Msp_1442 | EhbP                                                           | 6.3E-22  | MTH_1236 | conserved protein                                          | 1.6E-28  |
| MSM1062 | Msp_1443 | EhbO                                                           | 6.1E-79  | NONE     | NADH dehydrogenase (ubiquinone), subunit 1 related protein | 5.8E-111 |
| MSM1063 | Msp_1444 | EhbN                                                           | 8.0E-141 | NONE     | formate hydrogenlyase, subunit 5                           | 2.8E-143 |
| MSM1064 | Msp_1445 | EhbM                                                           | 1.0E-62  | NONE     | formate hydrogenlyase, subunit 7                           | 1.6E-67  |
| MSM1065 | Msp_1446 | EhbL                                                           | 8.6E-41  | MTH_1240 | ferredoxin-like protein                                    | 3.4E-51  |
| MSM1066 | Msp_1447 | EhbK                                                           | 7.7E-72  | MTH_1241 | polyferredoxin                                             | 1.7E-97  |
| MSM1067 | Msp_1448 | EhbJ                                                           | 4.5E-12  | MTH_1242 | unknown                                                    | 5.5E-19  |
| MSM1068 | Msp_1449 | EhbI                                                           | 4.2E-48  | MTH_1243 | conserved protein                                          | 1.0E-49  |
| MSM1069 | Msp_1450 | EhbH                                                           | 3.5E-21  | MTH_1244 | conserved protein                                          | 5.0E-25  |
| MSM1070 | Msp_1451 | EhbG                                                           | 4.8E-15  | MTH_1245 | unknown                                                    | 6.6E-16  |
| MSM1071 | Msp_1452 | EhbF                                                           | 1.1E-134 | NONE     | NADH dehydrogenase I, subunit N                            | 8.4E-142 |
| MSM1072 | Msp_1453 | EhbE                                                           | 2.0E-32  | MTH_1247 | conserved protein                                          | 4.5E-40  |
| MSM1073 | Msp_1454 | EhbD                                                           | 4.1E-18  | MTH_1248 | conserved protein                                          | 9.4E-24  |
| MSM1074 | Msp_1455 | EhbC                                                           | 1.4E-10  | MTH_1249 | conserved protein                                          | 1.5E-18  |
| MSM1075 | Msp_1456 | EhbB                                                           | 2.2E-10  | MTH_1250 | unknown                                                    | 1.1E-13  |
| MSM1076 | Msp_1457 | EhbA                                                           | 1.2E-27  | MTH_1251 | conserved protein                                          | 6.8E-37  |
| MSM1077 | Msp_1336 | predicted permease                                             | 2.3E-05  | NONE     |                                                            |          |
| MSM1078 | Msp_1336 | predicted permease                                             | 9.6E-97  | MTH_900  | conserved protein                                          | 3.1E-32  |
| MSM1079 | Msp_1458 | conserved hypothetical membrane-spanning protein               | 2.1E-28  | MTH_1252 | conserved protein                                          | 1.6E-35  |
| MSM1080 | NONE     |                                                                |          | MTH_1253 | unknown                                                    | 2.5E-48  |
| MSM1081 | Msp_0795 | partially conserved hypothetical protein                       | 1.4E-56  | MTH_1634 | transcriptional control factor (enhancer-binding protein)  | 5.0E-176 |
| MSM1082 | NONE     |                                                                |          | NONE     |                                                            |          |
| MSM1083 | Msp_0202 | conserved hypothetical membrane-spanning protein               | 4.5E-35  | MTH_230  | unknown                                                    | 1.0E-33  |
| MSM1084 | Msp_1459 | ArgG                                                           | 7.4E-138 | MTH_1254 | argininosuccinate synthase                                 | 2.1E-136 |
| MSM1085 | Msp_1240 | AqpM2                                                          | 1.8E-54  | MTH_103  | water channel protein                                      | 1.5E-71  |
| MSM1086 | NONE     |                                                                |          | MTH_101  | unknown                                                    | 3.8E-194 |
| MSM1087 | NONE     |                                                                |          | NONE     |                                                            |          |
| MSM1088 | NONE     |                                                                |          | NONE     |                                                            |          |
| MSM1089 | Msp_0506 | hypothetical membrane-spanning protein                         | 3.3E-04  | NONE     |                                                            |          |
| MSM1090 | Msp_1057 | SfsA                                                           | 6.0E-33  | MTH_1521 | sugar fermentation stimulation protein                     | 3.6E-31  |
| MSM1091 | Msp_1501 | predicted sugar kinase                                         | 3.6E-97  | MTH_1256 | conserved protein                                          | 1.4E-114 |

|         |          |                                                                               |          |          |                                                              |          |
|---------|----------|-------------------------------------------------------------------------------|----------|----------|--------------------------------------------------------------|----------|
| MSM1092 | Msp_1502 | formylmethanofuran-tetrahydromethanopterin formyltransferase                  | 1.2E-91  | MTH_1259 | formylmethanofuran:tetrahydromethanopterin formyltransferase | 1.3E-127 |
| MSM1093 | Msp_0233 | conserved hypothetical protein                                                | 2.3E-22  | NONE     |                                                              |          |
| MSM1094 | Msp_1503 | conserved hypothetical membrane-spanning protein                              | 2.8E-81  | MTH_1261 | conserved protein                                            | 7.2E-97  |
| MSM1095 | Msp_0830 | Trk-type potassium transport system, membrane protein                         | 2.6E-62  | MTH_1264 | TRK system potassium uptake protein TrkH                     | 2.1E-122 |
| MSM1096 | Msp_0250 | TrkA1                                                                         | 3.1E-52  | MTH_1265 | TRK system potassium uptake protein TrkA                     | 3.6E-79  |
| MSM1097 | Msp_1505 | putative Zn-dependent hydrolase                                               | 2.3E-40  | MTH_1267 | conserved protein                                            | 1.2E-53  |
| MSM1098 | Msp_1418 | putative archaeal holliday junction resolvase                                 | 1.4E-38  | MTH_1270 | conserved protein                                            | 1.4E-43  |
| MSM1099 | Msp_0270 | predicted biotin synthase related protein                                     | 7.4E-106 | MTH_1279 | conserved protein                                            | 2.3E-75  |
| MSM1100 | NONE     |                                                                               |          | MTH_627  | unknown                                                      | 7.2E-10  |
| MSM1101 | Msp_0269 | GatB                                                                          | 1.4E-175 | MTH_1280 | PET112-like protein                                          | 3.6E-182 |
| MSM1102 | Msp_0268 | conserved hypothetical protein                                                | 3.4E-78  | MTH_1282 | inosine-5'-monophosphate dehydrogenase related protein VI    | 2.3E-93  |
| MSM1103 | Msp_0267 | HisE                                                                          | 4.8E-31  | MTH_1283 | phosphoribosyl-AMP cyclohydrolase homolog                    | 3.0E-34  |
| MSM1104 | Msp_1506 | predicted acetyltransferase                                                   | 2.6E-11  | MTH_1284 | conserved protein                                            | 3.2E-16  |
| MSM1105 | Msp_1492 | conserved hypothetical protein                                                | 7.0E-62  | MTH_1286 | phosphoribosylaminoimidazole carboxylase related protein     | 1.7E-65  |
| MSM1106 | Msp_1497 | HypF                                                                          | 8.5E-208 | MTH_1287 | transcriptional regulator HypF homolog                       | 2.3E-219 |
| MSM1107 | Msp_1519 | predicted transcriptional regulator                                           | 6.6E-34  | MTH_1288 | unknown                                                      | 1.8E-52  |
| MSM1108 | Msp_1518 | GrpE                                                                          | 2.1E-44  | MTH_1289 | heat shock protein GrpE                                      | 1.6E-44  |
| MSM1109 | Msp_1517 | DnaK                                                                          | 8.6E-247 | MTH_1290 | DnaK protein (Hsp70)                                         | 7.7E-251 |
| MSM1110 | Msp_1516 | DnaJ                                                                          | 3.0E-118 | MTH_1291 | DnaJ protein                                                 | 1.0E-122 |
| MSM1111 | Msp_0145 | member of asn/thr-rich large protein family                                   | 5.9E-49  | MTH_716  | cell surface glycoprotein (s-layer protein)                  | 7.7E-12  |
| MSM1112 | Msp_0762 | member of asn/thr-rich large protein family                                   | 1.6E-40  | MTH_716  | cell surface glycoprotein (s-layer protein)                  | 3.3E-11  |
| MSM1113 | Msp_0762 | member of asn/thr-rich large protein family                                   | 2.9E-70  | MTH_716  | cell surface glycoprotein (s-layer protein)                  | 1.2E-05  |
| MSM1114 | Msp_0145 | member of asn/thr-rich large protein family                                   | 1.3E-24  | MTH_716  | cell surface glycoprotein (s-layer protein)                  | 3.3E-15  |
| MSM1115 | Msp_0017 | conserved hypothetical protein                                                | 2.2E-21  | NONE     |                                                              |          |
| MSM1116 | Msp_1108 | member of asn/thr-rich large protein family                                   | 4.2E-137 | MTH_911  | probable surface protein                                     | 1.5E-12  |
| MSM1117 | Msp_1110 | CobN                                                                          | 8.5E-304 | MTH_514  | cobalamin biosynthesis protein N                             | 1.4E-239 |
| MSM1118 | Msp_1494 | hypothetical membrane-spanning protein                                        | 1.5E-18  | MTH_1294 | unknown                                                      | 2.5E-23  |
| MSM1119 | Msp_1495 | hypothetical membrane-spanning protein                                        | 4.1E-25  | MTH_1295 | unknown                                                      | 4.8E-36  |
| MSM1120 | Msp_1496 | methionine aminopeptidase                                                     | 3.4E-53  | MTH_1296 | methionine aminopeptidase                                    | 2.8E-86  |
| MSM1121 | Msp_1305 | FrhB                                                                          | 3.9E-77  | NONE     | coenzyme F420-reducing hydrogenase, beta subunit             | 2.1E-97  |
| MSM1122 | Msp_1304 | FrhG                                                                          | 4.6E-81  | NONE     | coenzyme F420-reducing hydrogenase, gamma subunit            | 2.2E-102 |
| MSM1123 | Msp_1514 | putative coenzyme F420 hydrogenase, delta subunit-like protein                | 9.3E-44  | NONE     | coenzyme F420-reducing hydrogenase, delta subunit            | 4.7E-61  |
| MSM1124 | Msp_1302 | FrhA                                                                          | 9.4E-138 | NONE     | coenzyme F420-reducing hydrogenase, alpha subunit            | 8.8E-163 |
| MSM1125 | Msp_1110 | CobN                                                                          | 2.3E-10  | MTH_1301 | unknown                                                      | 3.8E-11  |
| MSM1126 | Msp_0120 | predicted transcriptional regulator                                           | 3.1E-20  | MTH_1795 | transcriptional regulator                                    | 1.1E-20  |
| MSM1127 | Msp_0121 | predicted cation transport ATPase                                             | 1.2E-162 | MTH_411  | cadmium efflux ATPase                                        | 1.2E-119 |
| MSM1128 | NONE     |                                                                               |          | NONE     |                                                              |          |
| MSM1129 | Msp_1523 | conserved hypothetical protein                                                | 2.3E-118 | MTH_1305 | conserved protein                                            | 3.6E-134 |
| MSM1130 | Msp_1028 | conserved hypothetical protein                                                | 4.5E-44  | MTH_1868 | conserved protein                                            | 1.4E-15  |
| MSM1131 | Msp_1524 | conserved hypothetical protein                                                | 1.1E-56  | MTH_1306 | conserved protein                                            | 1.1E-59  |
| MSM1132 | Msp_1525 | ribosome biogenesis protein Nop10                                             | 2.3E-15  | MTH_1307 | unknown                                                      | 4.0E-16  |
| MSM1133 | Msp_1527 | putative translation initiation factor 2, alpha subunit (aIF-2-alpha) (eIF2A) | 3.4E-94  | NONE     | translation initiation factor eIF-2, alpha subunit           | 3.5E-104 |
| MSM1134 | Msp_1528 | 30S ribosomal protein S27e                                                    | 2.3E-17  | MTH_1309 | ribosomal protein S27                                        | 8.1E-18  |
| MSM1135 | Msp_1529 | 50S ribosomal protein L44e                                                    | 1.6E-41  | MTH_1310 | ribosomal protein L36a                                       | 2.7E-42  |
| MSM1136 | Msp_1530 | partially conserved hypothetical protein                                      | 1.6E-30  | MTH_1311 | unknown                                                      | 2.1E-49  |
| MSM1137 | Msp_1531 | DNA polymerase sliding clamp (PCNA)                                           | 1.5E-73  | MTH_1312 | proliferating-cell nuclear antigen                           | 6.0E-93  |
| MSM1138 | Msp_0580 | predicted glutamine amidotransferase                                          | 5.2E-73  | MTH_787  | cobryic acid synthase                                        | 9.2E-10  |



|         |          |                                                               |          |          |                                                               |          |
|---------|----------|---------------------------------------------------------------|----------|----------|---------------------------------------------------------------|----------|
| MSM1139 | Msp_0581 | predicted UDP-N-acetylmuramyl tripeptide synthase             | 3.6E-90  | MTH_530  | UDP-N-acetylmuramyl tripeptide synthetase related protein     | 6.8E-16  |
| MSM1140 | Msp_0417 | hypothetical membrane-spanning protein                        | 2.7E-04  | NONE     |                                                               |          |
| MSM1141 | Msp_1075 | TrpA                                                          | 7.3E-44  | NONE     | tryptophan synthase, subunit alpha                            | 6.5E-48  |
| MSM1142 | Msp_1074 | TrpB                                                          | 6.4E-123 | NONE     | tryptophan synthase, beta subunit                             | 1.3E-120 |
| MSM1143 | Msp_1072 | TrpC                                                          | 1.7E-42  | MTH_1657 | indole-3-glycerol phosphate synthase                          | 1.4E-38  |
| MSM1144 | Msp_1076 | TrpD                                                          | 2.0E-71  | MTH_1661 | anthranilate phosphoribosyltransferase                        | 2.3E-68  |
| MSM1145 | Msp_1071 | TrpG                                                          | 7.4E-51  | MTH_1656 | anthranilate synthase component II                            | 1.1E-43  |
| MSM1146 | Msp_1070 | TrpE                                                          | 6.5E-78  | MTH_1655 | anthranilate synthase component I                             | 9.9E-84  |
| MSM1147 | NONE     |                                                               |          | NONE     |                                                               |          |
| MSM1148 | NONE     |                                                               |          | MTH_1189 | conserved protein                                             | 8.2E-08  |
| MSM1149 | Msp_0607 | hypothetical membrane-spanning protein                        | 6.0E-33  | MTH_1192 | conserved protein                                             | 2.8E-31  |
| MSM1150 | Msp_0608 | predicted transcriptional regulator                           | 9.4E-19  | MTH_1328 | conserved protein                                             | 1.3E-17  |
| MSM1151 | Msp_1247 | PurB                                                          | 6.0E-159 | MTH_1537 | adenylosuccinate lyase                                        | 8.4E-174 |
| MSM1152 | Msp_0879 | hypothetical membrane-spanning protein                        | 2.8E-04  | MTH_1538 | unknown                                                       | 6.4E-25  |
| MSM1153 | Msp_0224 | predicted cation transport ATPase                             | 1.1E-205 | MTH_1535 | heavy-metal transporting CPx-type ATPase                      | 5.1E-199 |
| MSM1154 | Msp_0200 | predicted metal-dependent hydrolase                           | 1.2E-07  | MTH_1534 | aryldialkylphosphatase related protein                        | 5.0E-89  |
| MSM1155 | Msp_0225 | conserved hypothetical protein                                | 1.4E-40  | MTH_1530 | conserved protein                                             | 1.7E-42  |
| MSM1156 | Msp_0221 | TruD                                                          | 6.2E-125 | MTH_1529 | conserved protein                                             | 4.6E-134 |
| MSM1157 | Msp_1512 | hypothetical membrane-spanning protein                        | 3.5E-05  | MTH_1526 | conserved protein                                             | 8.9E-04  |
| MSM1158 | Msp_1511 | HypE2                                                         | 8.9E-126 | MTH_1525 | hydrogenase expression/formation protein HypE related protein | 4.2E-156 |
| MSM1159 | Msp_1510 | HisH                                                          | 3.0E-38  | MTH_1524 | imidazoleglycerol-phosphate synthase                          | 9.1E-58  |
| MSM1160 | Msp_1461 | predicted nitrogenase molybdenum-iron protein                 | 3.8E-118 | MTH_1522 | nitrogenase alpha chain (NifD) related protein                | 8.9E-131 |
| MSM1161 | Msp_0719 | partially conserved hypothetical membrane-spanning protein    | 2.8E-05  | NONE     |                                                               |          |
| MSM1162 | NONE     |                                                               |          | NONE     |                                                               |          |
| MSM1163 | NONE     |                                                               |          | NONE     |                                                               |          |
| MSM1164 | Msp_1463 | predicted GTPase                                              | 1.4E-143 | MTH_1515 | GTP-binding protein                                           | 2.4E-153 |
| MSM1165 | Msp_1472 | predicted phosphohydrolase                                    | 2.2E-67  | MTH_1179 | conserved protein                                             | 9.0E-10  |
| MSM1166 | Msp_1474 | conserved hypothetical membrane-spanning protein              | 1.5E-146 | NONE     |                                                               |          |
| MSM1167 | Msp_1464 | CbiE                                                          | 6.8E-48  | MTH_1514 | precorrin-6Y methylase                                        | 3.9E-50  |
| MSM1168 | Msp_0590 | member of asn/thr-rich large protein family                   | 1.7E-16  | MTH_75   | surface protease related protein                              | 2.1E-11  |
| MSM1169 | NONE     |                                                               |          | NONE     |                                                               |          |
| MSM1170 | Msp_0169 | putative arsenical prump-driving ATPase                       | 5.3E-96  | MTH_1511 | arsenical pump-driving ATPase                                 | 6.9E-108 |
| MSM1171 | Msp_0170 | NadE                                                          | 1.1E-63  | MTH_1510 | NH(3)-dependent NAD+ synthetase                               | 1.3E-60  |
| MSM1172 | Msp_0171 | LeuS                                                          | 0.0E+00  | MTH_1508 | leucyl-tRNA synthetase                                        | 0.0E+00  |
| MSM1173 | Msp_0004 | predicted tRNA(1-methyladenosine) methyltransferase           | 1.0E-62  | MTH_1414 | protein-L-isoaspartate methyltransferase homolog              | 1.4E-77  |
| MSM1174 | Msp_0309 | HtpX                                                          | 1.8E-38  | MTH_569  | heat shock protein X                                          | 2.1E-67  |
| MSM1175 | Msp_0548 | hypothetical membrane-spanning protein                        | 6.6E-11  | NONE     |                                                               |          |
| MSM1176 | Msp_0413 | RfcS                                                          | 2.2E-115 | NONE     | replication factor C, small subunit                           | 3.7E-125 |
| MSM1177 | Msp_0414 | RfcL                                                          | 1.1E-113 | NONE     | replication factor C, large subunit                           | 3.8E-123 |
| MSM1178 | Msp_0578 | conserved hypothetical protein                                | 4.1E-34  | MTH_239  | unknown                                                       | 9.7E-38  |
| MSM1179 | Msp_0647 | AroE                                                          | 1.8E-72  | MTH_242  | shikimate 5-dehydrogenase                                     | 1.2E-71  |
| MSM1180 | NONE     |                                                               |          | MTH_1189 | conserved protein                                             | 1.6E-08  |
| MSM1181 | Msp_0648 | HisS                                                          | 5.1E-114 | MTH_244  | histidyl-tRNA synthetase                                      | 3.8E-130 |
| MSM1182 | Msp_0649 | HisI                                                          | 1.6E-39  | MTH_245  | phosphoribosyl-AMP cyclohydrolase                             | 1.0E-40  |
| MSM1183 | Msp_0650 | predicted ATPase                                              | 1.5E-155 | MTH_246  | twitching mobility (PilT) related protein                     | 8.0E-185 |
| MSM1184 | Msp_0651 | predicted sugar phosphate isomerase/epimerase or endonuclease | 8.7E-48  | MTH_247  | conserved protein                                             | 4.5E-49  |
| MSM1185 | Msp_1499 | putative methylated-DNA--protein-cysteine methyltransferase   | 1.3E-12  | MTH_618  | O6-methylguanidine-DNA methyltransferase                      | 2.8E-15  |

|         |          |                                                                         |          |          |                                                                                |          |
|---------|----------|-------------------------------------------------------------------------|----------|----------|--------------------------------------------------------------------------------|----------|
| MSM1186 | Msp_1489 | predicted potassium transport system, membrane component                | 9.9E-111 | NONE     |                                                                                |          |
| MSM1187 | Msp_0007 | predicted ERCC4-like helicase                                           | 5.4E-213 | NONE     | ATP-dependent RNA helicase, eIF-4A family                                      | 3.5E-241 |
| MSM1188 | Msp_0590 | member of asn/thr-rich large protein family                             | 1.4E-49  | MTH_716  | cell surface glycoprotein (s-layer protein)                                    | 6.9E-13  |
| MSM1189 | Msp_0017 | conserved hypothetical protein                                          | 1.7E-28  | NONE     |                                                                                |          |
| MSM1190 | Msp_1211 | partially conserved hypothetical membrane-spanning protein              | 6.7E-128 | MTH_530  | UDP-N-acetylmuramyl tripeptide synthetase related protein                      | 3.1E-57  |
| MSM1191 | Msp_1212 | predicted UDP-N-acetylmuramoylalanine--D-glutamate ligase               | 7.9E-102 | MTH_531  | UDP-N-acetylmuramyl tripeptide synthetase related protein                      | 1.3E-40  |
| MSM1192 | Msp_0008 | conserved hypothetical protein                                          | 9.1E-124 | MTH_1421 | conserved protein                                                              | 5.0E-137 |
| MSM1193 | Msp_0009 | putative single-stranded-DNA-specific exonuclease                       | 9.9E-111 | MTH_1422 | conserved protein                                                              | 9.3E-136 |
| MSM1194 | Msp_0010 | 30S ribosomal protein S15P                                              | 5.3E-48  | MTH_1423 | ribosomal protein S13 (E.coli )                                                | 2.1E-49  |
| MSM1195 | Msp_0011 | putative xanthosine triphosphate pyrophosphatase                        | 1.9E-61  | MTH_1424 | conserved protein                                                              | 1.2E-62  |
| MSM1196 | Msp_0635 | cell division control protein 6-like 2                                  | 9.7E-06  | NONE     |                                                                                |          |
| MSM1197 | NONE     |                                                                         |          | NONE     |                                                                                |          |
| MSM1198 | Msp_0013 | putative O-sialoglycoprotein endopeptidase                              | 7.7E-159 | MTH_1425 | O-sialoglycoprotein endopeptidase                                              | 1.9E-174 |
| MSM1199 | Msp_0999 | hypothetical protein                                                    | 7.0E-06  | NONE     |                                                                                |          |
| MSM1200 | Msp_0012 | predicted phosphoribosyltransferase                                     | 1.4E-88  | MTH_1426 | conserved protein                                                              | 3.4E-99  |
| MSM1201 | Msp_0014 | UppP                                                                    | 6.0E-72  | MTH_1428 | bacitracin resistance protein                                                  | 1.1E-43  |
| MSM1202 | Msp_0015 | llvE                                                                    | 4.0E-114 | MTH_1430 | branched-chain amino-acid aminotransferase                                     | 5.2E-110 |
| MSM1203 | Msp_0724 | hypothetical membrane-spanning protein                                  | 6.7E-09  | MTH_470  | conserved protein                                                              | 7.9E-05  |
| MSM1204 | Msp_0163 | F420-dependent methylenetetrahydromethanopterin dehydrogenase           | 4.0E-82  | NONE     | coenzyme F420-dependent N5,N10-methylene tetrahydromethanopterin dehydrogenase | 2.2E-102 |
| MSM1205 | Msp_0417 | hypothetical membrane-spanning protein                                  | 5.3E-04  | MTH_1490 | unknown                                                                        | 3.5E-17  |
| MSM1206 | Msp_0164 | HisB                                                                    | 2.5E-57  | MTH_1467 | imidazoleglycerol-phosphate dehydratase                                        | 9.7E-54  |
| MSM1207 | NONE     |                                                                         |          | MTH_1470 | molybdenum transport protein ModA related protein                              | 2.2E-17  |
| MSM1208 | Msp_0165 | predicted polysaccharide biosynthesis protein                           | 5.0E-116 | MTH_1471 | O-antigen transporter homolog                                                  | 3.2E-87  |
| MSM1209 | Msp_0540 | predicted multimeric flavodoxin                                         | 6.7E-25  | MTH_1473 | conserved protein                                                              | 4.7E-54  |
| MSM1210 | Msp_0925 | predicted arabinose efflux permease                                     | 7.5E-22  | MTH_195  | efflux pump antibiotic resistance protein                                      | 2.5E-24  |
| MSM1211 | Msp_0260 | hypothetical protein                                                    | 4.6E-16  | MTH_1626 | phosphoserine phosphatase                                                      | 4.3E-06  |
| MSM1212 | NONE     |                                                                         |          | NONE     |                                                                                |          |
| MSM1213 | Msp_1498 | formaldehyde activating enzyme fused to 3-hexulose-6-phosphate synthase | 8.3E-162 | MTH_1474 | D-arabino 3-hexulose 6-phosphate formaldehyde lyase related protein            | 6.3E-169 |
| MSM1214 | Msp_1573 | ThrS                                                                    | 7.3E-202 | MTH_1455 | threonyl-tRNA synthetase                                                       | 1.3E-225 |
| MSM1215 | Msp_0162 | CbiA                                                                    | 1.7E-147 | NONE     | cobyrinic acid a,c-diamide synthase                                            | 9.4E-143 |
| MSM1216 | Msp_0166 | conserved hypothetical membrane-spanning protein                        | 1.3E-74  | MTH_1461 | conserved protein                                                              | 2.1E-67  |
| MSM1217 | Msp_0019 | partially conserved hypothetical protein                                | 5.0E-45  | MTH_1434 | unknown                                                                        | 1.3E-55  |
| MSM1218 | Msp_0020 | SurE                                                                    | 1.2E-68  | MTH_1435 | survival protein SurE                                                          | 1.5E-73  |
| MSM1219 | NONE     |                                                                         |          | NONE     |                                                                                |          |
| MSM1220 | NONE     |                                                                         |          | MTH_1440 | unknown                                                                        | 8.6E-14  |
| MSM1221 | Msp_0021 | conserved hypothetical protein                                          | 5.2E-89  | MTH_1441 | conserved protein                                                              | 3.4E-106 |
| MSM1222 | Msp_0022 | llvC                                                                    | 6.9E-126 | MTH_1442 | ketol-acid reductoisomerase                                                    | 2.7E-122 |
| MSM1223 | Msp_0591 | predicted carbonic anhydrase                                            | 8.1E-13  | MTH_1582 | carbonic anhydrase                                                             | 3.7E-38  |
| MSM1224 | Msp_0025 | llvH1                                                                   | 1.1E-45  | NONE     | acetolactate synthase, small subunit                                           | 4.1E-55  |
| MSM1225 | Msp_0026 | llvB1                                                                   | 6.3E-180 | NONE     | acetolactate synthase, large subunit                                           | 3.5E-207 |
| MSM1226 | Msp_0031 | ArgF                                                                    | 2.3E-102 | MTH_1446 | ornithine carbamoyltransferase                                                 | 4.6E-102 |
| MSM1227 | Msp_0030 | PurD                                                                    | 1.1E-150 | MTH_1445 | glycinamide ribonucleotide synthetase                                          | 4.2E-147 |
| MSM1228 | Msp_0513 | predicted Na+-driven multidrug efflux pump                              | 5.6E-108 | MTH_314  | conserved protein                                                              | 2.8E-95  |
| MSM1229 | Msp_0513 | predicted Na+-driven multidrug efflux pump                              | 1.1E-125 | MTH_314  | conserved protein                                                              | 3.1E-105 |
| MSM1230 | Msp_0512 | predicted transcriptional regulator                                     | 5.3E-25  | MTH_313  | transcriptional regulator                                                      | 2.2E-17  |
| MSM1231 | Msp_1574 | ArgS                                                                    | 1.4E-157 | MTH_1447 | arginyl-tRNA synthetase                                                        | 9.3E-175 |

|         |          |                                                               |          |          |                                                     |          |
|---------|----------|---------------------------------------------------------------|----------|----------|-----------------------------------------------------|----------|
| MSM1232 | Msp_1575 | putative signal peptidase                                     | 3.6E-42  | MTH_1448 | signal peptidase                                    | 2.7E-42  |
| MSM1233 | Msp_1180 | HemL                                                          | 5.8E-138 | MTH_228  | glutamate-1-semialdehyde aminotransferase           | 2.1E-136 |
| MSM1234 | Msp_1179 | CbiC                                                          | 8.2E-68  | MTH_227  | precorrin isomerase                                 | 7.1E-58  |
| MSM1235 | Msp_0093 | predicted flavoprotein                                        | 2.5E-59  | NONE     |                                                     |          |
| MSM1236 | Msp_0135 | AspS                                                          | 1.9E-164 | MTH_226  | aspartyl-tRNA synthetase                            | 1.2E-165 |
| MSM1237 | Msp_1576 | IivD                                                          | 7.2E-195 | MTH_1449 | dihydroxy-acid dehydratase                          | 3.4E-177 |
| MSM1238 | Msp_0134 | HisD                                                          | 2.7E-131 | MTH_225  | histidinol dehydrogenase                            | 2.7E-138 |
| MSM1239 | Msp_1569 | predicted DNA-binding protein                                 | 2.7E-92  | MTH_1458 | unknown                                             | 5.1E-96  |
| MSM1240 | Msp_1570 | conserved hypothetical protein                                | 8.9E-23  | MTH_1457 | unknown                                             | 3.0E-24  |
| MSM1241 | Msp_1571 | predicted ATPase                                              | 5.2E-82  | MTH_1456 | chromosome partitioning protein Soj                 | 1.9E-73  |
| MSM1242 | Msp_1074 | TrpB                                                          | 7.2E-37  | NONE     | tryptophan synthase, beta subunit homolog           | 1.0E-168 |
| MSM1243 | NONE     |                                                               |          | MTH_1477 | unknown                                             | 3.1E-73  |
| MSM1244 | Msp_1491 | predicted metal-dependent phosphoesterase                     | 1.9E-45  | MTH_1478 | conserved protein                                   | 8.9E-28  |
| MSM1245 | Msp_0198 | AlbA                                                          | 2.2E-26  | MTH_1483 | conserved protein                                   | 3.8E-27  |
| MSM1246 | Msp_0199 | LeuA1                                                         | 8.3E-162 | MTH_1481 | isopropylmalate synthase                            | 2.8E-175 |
| MSM1247 | Msp_0197 | conserved hypothetical membrane-spanning protein              | 2.6E-78  | MTH_1485 | serine/threonine protein kinase related protein     | 1.2E-92  |
| MSM1248 | Msp_0196 | ABC-type multidrug transport system, permease protein         | 4.6E-74  | MTH_1486 | conserved protein                                   | 1.5E-82  |
| MSM1249 | Msp_0195 | ABC-type multidrug transport system, ATP-binding protein      | 1.6E-94  | MTH_1487 | ABC transporter (ATP-binding)                       | 5.1E-103 |
| MSM1250 | Msp_0194 | predicted transcriptional regulator                           | 3.6E-19  | MTH_1488 | unknown                                             | 1.6E-19  |
| MSM1251 | Msp_0651 | predicted sugar phosphate isomerase/epimerase or endonuclease | 7.5E-26  | MTH_1489 | conserved protein                                   | 8.8E-60  |
| MSM1252 | Msp_0191 | MapB                                                          | 8.0E-38  | MTH_1493 | cation transporting P-type ATPase related protein   | 1.8E-54  |
| MSM1253 | Msp_0181 | GatA                                                          | 2.1E-165 | MTH_1496 | amidase                                             | 1.1E-164 |
| MSM1254 | Msp_0174 | predicted cobyrinic acid synthase                             | 7.3E-115 | NONE     | cobyrinic acid a,c-diamide synthase related protein | 8.9E-115 |
| MSM1255 | NONE     |                                                               |          | NONE     |                                                     |          |
| MSM1256 | Msp_0175 | RibB                                                          | 2.5E-59  | MTH_1499 | GTP cyclohydrolase II                               | 2.8E-63  |
| MSM1257 | Msp_0177 | predicted transcriptional regulator                           | 1.7E-19  | MTH_1500 | conserved protein                                   | 9.4E-24  |
| MSM1258 | Msp_0180 | TfrA                                                          | 2.0E-174 | NONE     | succinate dehydrogenase, flavoprotein subunit       | 3.9E-185 |
| MSM1259 | Msp_0200 | predicted metal-dependent hydrolase                           | 1.0E-115 | MTH_1505 | N-ethylammelline chlorohydrolase homolog            | 9.3E-120 |
| MSM1260 | Msp_0383 | archaeal histone                                              | 8.8E-16  | MTH_1696 | histone HMTa2                                       | 8.4E-16  |
| MSM1261 | Msp_0178 | HisG                                                          | 1.4E-88  | MTH_1506 | ATP phosphoribosyltransferase                       | 1.3E-90  |
| MSM1262 | NONE     |                                                               |          | NONE     |                                                     |          |
| MSM1263 | Msp_0003 | PyrB                                                          | 8.4E-98  | MTH_1413 | aspartate carbamoyltransferase                      | 5.1E-96  |
| MSM1264 | Msp_0001 | cell division control protein 6-like 1                        | 4.9E-141 | MTH_1412 | Cdc6 related protein                                | 8.2E-160 |
| MSM1265 | NONE     |                                                               |          | MTH_1410 | unknown                                             | 1.4E-31  |
| MSM1266 | Msp_1588 | CobD                                                          | 4.4E-76  | MTH_1409 | cobalamin biosynthesis protein B                    | 7.6E-54  |
| MSM1267 | Msp_1587 | CbiG                                                          | 2.3E-70  | MTH_1408 | cobalamin biosynthesis protein G                    | 3.0E-50  |
| MSM1268 | Msp_1586 | conserved hypothetical protein                                | 2.7E-21  | MTH_1407 | conserved protein                                   | 2.6E-28  |
| MSM1269 | NONE     |                                                               |          | NONE     |                                                     |          |
| MSM1270 | Msp_1585 | predicted class II aldolase                                   | 4.7E-40  | MTH_1406 | fucose-1-phosphate aldolase                         | 4.9E-43  |
| MSM1271 | Msp_1584 | PoIB                                                          | 4.5E-131 | MTH_1405 | DNA polymerase delta small subunit                  | 3.6E-156 |
| MSM1272 | Msp_1583 | hypothetical membrane-spanning protein                        | 5.8E-19  | MTH_1404 | unknown                                             | 4.3E-28  |
| MSM1273 | Msp_1582 | CbiH                                                          | 2.5E-98  | MTH_1403 | precorrin-3 methylase                               | 1.2E-101 |
| MSM1274 | NONE     |                                                               |          | MTH_1402 | conserved protein                                   | 6.4E-73  |
| MSM1275 | Msp_0962 | hypothetical membrane-spanning protein                        | 2.4E-04  | MTH_1401 | unknown                                             | 5.4E-108 |
| MSM1276 | Msp_1558 | hypothetical protein                                          | 1.7E-10  | MTH_1400 | unknown                                             | 1.3E-16  |
| MSM1277 | Msp_1559 | conserved hypothetical membrane-spanning protein              | 8.0E-38  | MTH_1399 | unknown                                             | 2.0E-46  |
| MSM1278 | Msp_0757 | predicted ATPase                                              | 4.3E-101 | NONE     |                                                     |          |
| MSM1279 | Msp_1562 | conserved hypothetical protein                                | 1.5E-50  | MTH_1398 | conserved protein                                   | 2.3E-52  |
| MSM1280 | Msp_1561 | conserved hypothetical protein                                | 5.0E-52  | MTH_1397 | conserved protein                                   | 1.2E-25  |
| MSM1281 | Msp_1563 | CbiX                                                          | 7.5E-42  | MTH_1397 | conserved protein                                   | 8.6E-30  |

|         |          |                                                                                       |          |          |                                                          |          |
|---------|----------|---------------------------------------------------------------------------------------|----------|----------|----------------------------------------------------------|----------|
| MSM1282 | Msp_0590 | member of asn/thr-rich large protein family                                           | 3.1E-13  | MTH_716  | cell surface glycoprotein (s-layer protein)              | 2.7E-05  |
| MSM1283 | Msp_1564 | ThiL                                                                                  | 6.8E-48  | MTH_1396 | thiamine monphosphate kinase                             | 3.1E-57  |
| MSM1284 | Msp_1565 | predicted pyruvate-formate lyase-activating enzyme                                    | 1.5E-66  | MTH_1395 | pyruvate formate-lyase activating enzyme related protein | 3.5E-81  |
| MSM1285 | Msp_0615 | partially conserved hypothetical membrane-spanning protein                            | 6.8E-05  | NONE     |                                                          |          |
| MSM1286 | Msp_1479 | predicted 3-octaprenyl-4-hydroxybenzoate carboxy-lyase                                | 5.7E-147 | MTH_1394 | conserved protein                                        | 3.5E-152 |
| MSM1287 | Msp_1480 | PurE                                                                                  | 6.4E-68  | MTH_1393 | phosphoribosylaminoimidazole carboxylase                 | 1.9E-80  |
| MSM1288 | NONE     |                                                                                       |          | NONE     |                                                          |          |
| MSM1289 | Msp_1168 | CobS                                                                                  | 6.5E-04  | NONE     |                                                          |          |
| MSM1290 | Msp_0054 | predicted glycosyltransferase                                                         | 1.4E-33  | MTH_374  | dolichyl-phosphate mannose synthase related protein      | 7.5E-31  |
| MSM1291 | NONE     |                                                                                       |          | NONE     |                                                          |          |
| MSM1292 | Msp_0920 | predicted transcriptional accessory protein                                           | 9.5E-232 | NONE     | translation initiation factor eIF-2, alpha subunit       | 2.1E-04  |
| MSM1293 | Msp_0965 | predicted nitroreductase                                                              | 3.3E-16  | MTH_120  | NADPH-oxidoreductase                                     | 2.1E-33  |
| MSM1294 | Msp_1481 | conserved hypothetical membrane-spanning protein                                      | 3.4E-124 | MTH_1392 | dolichyl-phosphate mannoosyltransferase related protein  | 5.8E-150 |
| MSM1295 | Msp_1482 | conserved hypothetical membrane-spanning protein                                      | 7.0E-94  | MTH_1391 | conserved protein                                        | 3.8E-114 |
| MSM1296 | Msp_1483 | RibH                                                                                  | 2.0E-50  | MTH_1390 | riboflavin synthase beta subunit                         | 1.4E-54  |
| MSM1297 | Msp_0219 | conserved hypothetical protein                                                        | 3.0E-70  | NONE     |                                                          |          |
| MSM1298 | Msp_1484 | LeuB                                                                                  | 3.8E-109 | MTH_1388 | 3-isopropylmalate dehydrogenase                          | 3.2E-103 |
| MSM1299 | Msp_1485 | LeuD1                                                                                 | 3.1E-43  | NONE     | 3-isopropylmalate dehydratase, LeuC subunit              | 3.3E-60  |
| MSM1300 | Msp_1486 | LeuC1                                                                                 | 1.3E-165 | NONE     | 3-isopropylmalate dehydratase, LeuD subunit              | 1.7E-175 |
| MSM1301 | NONE     |                                                                                       |          | NONE     |                                                          |          |
| MSM1302 | NONE     |                                                                                       |          | NONE     |                                                          |          |
| MSM1303 | Msp_0214 | predicted UDP-N-acetyl-D-mannosaminuronate dehydrogenase                              | 2.3E-143 | MTH_836  | UDP-N-acetyl-D-mannosaminuronic acid dehydrogenase       | 2.8E-79  |
| MSM1304 | Msp_1116 | predicted dTDP-4-dehydrorhamnose reductase                                            | 9.6E-42  | MTH_1792 | dTDP-4-dehydrorhamnose reductase                         | 1.9E-73  |
| MSM1305 | Msp_0762 | member of asn/thr-rich large protein family                                           | 5.3E-36  | MTH_716  | cell surface glycoprotein (s-layer protein)              | 2.2E-12  |
| MSM1306 | Msp_0590 | member of asn/thr-rich large protein family                                           | 3.5E-45  | MTH_716  | cell surface glycoprotein (s-layer protein)              | 1.8E-07  |
| MSM1307 | Msp_1102 | predicted dTDP-glucose pyrophosphorylase                                              | 4.1E-41  | MTH_1791 | glucose-1-phosphate thymidyltransferase                  | 1.4E-123 |
| MSM1308 | Msp_0539 | predicted dTDP-4-dehydrorhamnose 3,5-epimerase                                        | 1.9E-68  | NONE     | dTDP-4-dehydrorhamnose 3,5-epimerase                     | 5.4E-60  |
| MSM1309 | Msp_1114 | predicted dTDP-D-glucose 4,6-dehydratase                                              | 4.5E-106 | NONE     | dTDP-glucose 4,6-dehydratase                             | 3.0E-137 |
| MSM1310 | Msp_0212 | predicted glycosyltransferase                                                         | 1.8E-54  | MTH_884  | teichoic acid biosynthesis related protein               | 7.1E-10  |
| MSM1311 | Msp_0496 | predicted glycosyltransferase                                                         | 2.8E-34  | MTH_136  | dolichyl-phosphate mannose synthase                      | 2.2E-05  |
| MSM1312 | Msp_0500 | predicted glycosyltransferase                                                         | 4.8E-79  | MTH_172  | conserved protein                                        | 6.5E-19  |
| MSM1313 | Msp_0492 | predicted glycosyltransferase                                                         | 6.1E-57  | MTH_338  | LPS biosynthesis RfbU related protein                    | 2.9E-07  |
| MSM1314 | NONE     |                                                                                       |          | NONE     |                                                          |          |
| MSM1315 | NONE     |                                                                                       |          | NONE     |                                                          |          |
| MSM1316 | Msp_0495 | predicted glycosyltransferase                                                         | 2.3E-33  | MTH_884  | teichoic acid biosynthesis related protein               | 8.9E-09  |
| MSM1317 | Msp_0500 | predicted glycosyltransferase                                                         | 2.9E-07  | NONE     |                                                          |          |
| MSM1318 | Msp_0927 | hypothetical protein                                                                  | 2.1E-30  | NONE     |                                                          |          |
| MSM1319 | Msp_0928 | hypothetical protein                                                                  | 3.0E-31  | NONE     |                                                          |          |
| MSM1320 | Msp_0492 | predicted glycosyltransferase                                                         | 4.1E-58  | NONE     |                                                          |          |
| MSM1321 | Msp_0500 | predicted glycosyltransferase                                                         | 4.4E-76  | MTH_172  | conserved protein                                        | 9.5E-17  |
| MSM1322 | Msp_0492 | predicted glycosyltransferase                                                         | 6.5E-62  | MTH_338  | LPS biosynthesis RfbU related protein                    | 9.6E-12  |
| MSM1323 | Msp_0495 | predicted glycosyltransferase                                                         | 5.3E-34  | MTH_884  | teichoic acid biosynthesis related protein               | 2.0E-08  |
| MSM1324 | Msp_0215 | predicted glycosyltransferase                                                         | 1.0E-32  | MTH_884  | teichoic acid biosynthesis related protein               | 1.5E-08  |
| MSM1325 | Msp_0204 | predicted ABC-type polysaccharide/polyol phosphate export system, permease protein    | 1.2E-64  | MTH_1092 | putative membrane protein                                | 6.6E-06  |
| MSM1326 | Msp_0205 | predicted ABC-type polysaccharide/polyol phosphate export system, ATP-binding protein | 3.7E-79  | MTH_1370 | ABC transporter (ATP-binding protein)                    | 2.0E-16  |
| MSM1327 | NONE     |                                                                                       |          | MTH_361  | teichoic acid biosynthesis protein RodC related protein  | 2.4E-17  |
| MSM1328 | Msp_0212 | predicted glycosyltransferase                                                         | 2.9E-26  | MTH_884  | teichoic acid biosynthesis related protein               | 2.0E-12  |

|         |          |                                                                       |          |          |                                                    |          |
|---------|----------|-----------------------------------------------------------------------|----------|----------|----------------------------------------------------|----------|
| MSM1329 | Msp_0206 | predicted glycosyltransferase                                         | 5.2E-82  | MTH_172  | conserved protein                                  | 2.5E-46  |
| MSM1330 | Msp_0207 | predicted glycosyltransferase                                         | 9.1E-69  | MTH_172  | conserved protein                                  | 1.1E-20  |
| MSM1331 | Msp_0208 | predicted bacterial sugar transferase                                 | 9.0E-117 | NONE     |                                                    |          |
| MSM1332 | Msp_1487 | predicted ssDNA-binding protein                                       | 6.2E-157 | MTH_1385 | replication factor A related protein               | 7.8E-152 |
| MSM1333 | Msp_1488 | RadA                                                                  | 6.9E-142 | MTH_1383 | DNA repair protein RadA                            | 6.4E-144 |
| MSM1334 | Msp_1477 | predicted permease                                                    | 1.4E-56  | MTH_1382 | conserved protein                                  | 1.2E-57  |
| MSM1335 | NONE     |                                                                       |          | NONE     |                                                    |          |
| MSM1336 | Msp_1476 | HdrA1                                                                 | 6.9E-277 | NONE     | heterodisulfide reductase, subunit A               | 2.0E-298 |
| MSM1337 | Msp_1475 | GlyA                                                                  | 5.9E-145 | MTH_1380 | serine hydroxymethyltransferase                    | 6.5E-151 |
| MSM1338 | Msp_1473 | predicted flavoprotein                                                | 3.4E-53  | MTH_1379 | conserved protein (contains ferredoxin domain)     | 5.0E-73  |
| MSM1339 | Msp_1471 | conserved hypothetical protein                                        | 2.5E-11  | MTH_1377 | conserved protein                                  | 9.7E-22  |
| MSM1340 | Msp_1470 | S-adenosylmethionine synthetase                                       | 2.2E-138 | MTH_1376 | conserved protein                                  | 3.7E-148 |
| MSM1341 | Msp_1468 | IleS                                                                  | 0.0E+00  | MTH_1375 | isoleucyl-tRNA synthetase                          | 0.0E+00  |
| MSM1342 | Msp_1467 | PurL                                                                  | 5.9E-239 | MTH_1374 | phosphoribosylformylglycinamide synthase II        | 4.4E-255 |
| MSM1343 | NONE     |                                                                       |          | MTH_1369 | molybdenum cofactor biosynthesis MoeA              | 2.5E-110 |
| MSM1344 | Msp_1466 | predicted membrane-associated Zn-dependent protease                   | 1.4E-81  | MTH_1368 | conserved protein                                  | 3.4E-99  |
| MSM1345 | NONE     |                                                                       |          | NONE     |                                                    |          |
| MSM1346 | Msp_0822 | hypothetical protein                                                  | 1.6E-06  | NONE     |                                                    |          |
| MSM1347 | NONE     |                                                                       |          | NONE     |                                                    |          |
| MSM1348 | Msp_0789 | rubrerythrin                                                          | 2.7E-04  | MTH_1351 | conserved protein                                  | 4.2E-37  |
| MSM1349 | Msp_0787 | FprA                                                                  | 2.9E-136 | MTH_1350 | flavoprotein AI                                    | 2.7E-152 |
| MSM1350 | Msp_0061 | conserved hypothetical protein                                        | 5.4E-32  | MTH_1349 | conserved protein                                  | 3.1E-48  |
| MSM1351 | Msp_0038 | CbiL                                                                  | 1.1E-58  | MTH_1348 | precorrin-2 methyltransferase                      | 9.8E-61  |
| MSM1352 | Msp_0036 | putative ATP-dependent helicase                                       | 1.1E-175 | MTH_1347 | probable ATP-dependent helicase                    | 3.4E-212 |
| MSM1353 | Msp_1532 | hypothetical membrane-spanning protein                                | 1.6E-08  | MTH_1313 | unknown                                            | 9.0E-13  |
| MSM1354 | Msp_1533 | RpoM1                                                                 | 4.7E-33  | MTH_1314 | transcription elongation factor TFIIIS             | 4.8E-36  |
| MSM1355 | Msp_1534 | putative ADP-ribose pyrophosphatase                                   | 4.9E-38  | MTH_1315 | mutator MutT protein                               | 1.1E-34  |
| MSM1356 | Msp_1535 | RpoL                                                                  | 2.1E-14  | NONE     | DNA-dependent RNA polymerase, subunit L            | 5.5E-19  |
| MSM1357 | Msp_1536 | predicted RNA-binding protein                                         | 2.6E-32  | MTH_1318 | conserved protein                                  | 1.6E-46  |
| MSM1358 | Msp_1537 | predicted diphthamide synthase, subunit DPH2                          | 6.1E-95  | MTH_1319 | conserved protein                                  | 1.1E-109 |
| MSM1359 | Msp_1538 | putative adenine phosphoribosyltransferase                            | 5.0E-52  | MTH_1320 | adenine phosphoribosyltransferase                  | 2.2E-54  |
| MSM1360 | Msp_1539 | signal recognition particle, 54 kDa protein                           | 2.0E-151 | MTH_1321 | signal recognition particle protein SRP54          | 5.8E-159 |
| MSM1361 | Msp_1541 | predicted pseudouridylate synthase                                    | 4.0E-82  | MTH_1322 | conserved protein                                  | 1.0E-104 |
| MSM1362 | NONE     |                                                                       |          | MTH_809  | molybdenum cofactor biosynthesis protein MoaC      | 2.2E-47  |
| MSM1363 | Msp_0229 | SecG                                                                  | 2.2E-12  | NONE     |                                                    |          |
| MSM1364 | Msp_0032 | HisF                                                                  | 1.6E-112 | MTH_1343 | imidazoleglycerol-phosphate synthase (cyclase)     | 3.7E-109 |
| MSM1365 | Msp_0034 | putative 3-methyladenine DNA glycosylase/8-oxoguanine DNA glycosylase | 2.1E-37  | MTH_1342 | 8-oxoguanine DNA glycosylase                       | 1.1E-68  |
| MSM1366 | NONE     |                                                                       |          | MTH_758  | S-D-lactoylglycyl-L-homoserine methylglyoxal lyase | 7.2E-26  |
| MSM1367 | Msp_0035 | predicted peptidyl-prolyl cis-trans isomerase 1                       | 2.3E-63  | MTH_1338 | peptidyl-prolyl cis-trans isomerase B              | 1.9E-57  |
| MSM1368 | Msp_0037 | ArgD                                                                  | 6.6E-121 | MTH_1337 | N-acetylmethionine aminotransferase                | 8.1E-121 |
| MSM1369 | Msp_0006 | predicted NUDIX-related protein                                       | 4.5E-12  | MTH_1336 | mutator MutT protein homolog                       | 1.0E-17  |
| MSM1370 | Msp_0715 | conserved hypothetical membrane-spanning protein                      | 9.6E-97  | NONE     |                                                    |          |
| MSM1371 | Msp_1578 | LysA                                                                  | 2.9E-152 | MTH_1335 | diaminopimelate decarboxylase                      | 2.3E-155 |
| MSM1372 | Msp_1579 | DapF                                                                  | 1.3E-74  | MTH_1334 | diaminopimelate epimerase                          | 2.8E-86  |
| MSM1373 | Msp_1545 | conserved hypothetical protein                                        | 3.2E-50  | MTH_1329 | methyltransferase related protein                  | 4.1E-46  |
| MSM1374 | Msp_1544 | KsgA                                                                  | 1.6E-62  | MTH_1326 | dimethyladenosine transferase                      | 1.3E-56  |
| MSM1375 | NONE     |                                                                       |          | MTH_1325 | conserved protein                                  | 2.9E-61  |
| MSM1376 | Msp_1543 | conserved hypothetical protein                                        | 5.1E-20  | MTH_1324 | conserved protein                                  | 2.1E-28  |
| MSM1377 | Msp_1542 | 50S ribosomal protein L21e                                            | 3.3E-32  | MTH_1323 | ribosomal protein L21                              | 2.7E-35  |
| MSM1378 | Msp_0981 | conserved hypothetical protein                                        | 7.4E-19  | NONE     |                                                    |          |

|         |          |                                                            |          |          |                                                                   |          |
|---------|----------|------------------------------------------------------------|----------|----------|-------------------------------------------------------------------|----------|
| MSM1379 | Msp_0967 | putative NADP-dependent alcohol dehydrogenase              | 1.4E-24  | NONE     |                                                                   |          |
| MSM1380 | Msp_0967 | putative NADP-dependent alcohol dehydrogenase              | 4.6E-74  | NONE     |                                                                   |          |
| MSM1381 | Msp_0967 | putative NADP-dependent alcohol dehydrogenase              | 2.2E-11  | NONE     |                                                                   |          |
| MSM1382 | Msp_0504 | conserved hypothetical membrane-spanning protein           | 2.7E-53  | NONE     |                                                                   |          |
| MSM1383 | Msp_0254 | anaerobic ribonucleotide-triphosphate reductase            | 1.6E-307 | MTH_1539 | anaerobic ribonucleoside-triphosphate reductase                   | 9.9E-306 |
| MSM1384 | Msp_0255 | PoIC                                                       | 3.9E-290 | MTH_1536 | conserved protein                                                 | 0.0E+00  |
| MSM1385 | Msp_0113 | conserved hypothetical protein                             | 7.7E-16  | MTH_1626 | phosphoserine phosphatase                                         | 2.3E-09  |
| MSM1386 | NONE     |                                                            |          | NONE     |                                                                   |          |
| MSM1387 | Msp_0249 | LysS                                                       | 4.8E-205 | MTH_1542 | conserved protein                                                 | 2.6E-202 |
| MSM1388 | Msp_0251 | ThiC2                                                      | 1.0E-156 | MTH_1543 | thiamine biosynthesis protein                                     | 5.3E-172 |
| MSM1389 | Msp_0252 | predicted ribokinase                                       | 1.3E-78  | MTH_1544 | ribokinase                                                        | 3.8E-91  |
| MSM1390 | Msp_0248 | conserved hypothetical protein                             | 2.5E-50  | MTH_1545 | conserved protein                                                 | 1.5E-55  |
| MSM1391 | Msp_0247 | predicted sugar phosphate isomerase                        | 1.2E-52  | MTH_1546 | conserved protein                                                 | 1.3E-51  |
| MSM1392 | NONE     |                                                            |          | NONE     | nitrate assimilation protein, narQ                                | 4.4E-58  |
| MSM1393 | NONE     |                                                            |          | NONE     |                                                                   |          |
| MSM1394 | Msp_0355 | conserved hypothetical membrane-spanning protein           | 1.5E-04  | NONE     |                                                                   |          |
| MSM1395 | Msp_0340 | PstB                                                       | 3.1E-27  | MTH_605  | ABC transporter                                                   | 3.2E-30  |
| MSM1396 | NONE     |                                                            |          | MTH_1345 | conserved protein                                                 | 4.7E-22  |
| MSM1397 | Msp_0432 | member of asn/thr-rich large protein family                | 7.3E-30  | MTH_911  | probable surface protein                                          | 3.0E-12  |
| MSM1398 | Msp_0762 | member of asn/thr-rich large protein family                | 4.2E-21  | MTH_716  | cell surface glycoprotein (s-layer protein)                       | 2.4E-10  |
| MSM1399 | Msp_0911 | member of asn/thr-rich large protein family                | 5.8E-13  | MTH_716  | cell surface glycoprotein (s-layer protein)                       | 4.7E-13  |
| MSM1400 | Msp_0615 | partially conserved hypothetical membrane-spanning protein | 5.3E-05  | MTH_672  | unknown                                                           | 1.6E-04  |
| MSM1401 | Msp_1106 | conserved hypothetical membrane-spanning protein           | 5.9E-42  | MTH_671  | unknown                                                           | 1.9E-48  |
| MSM1402 | Msp_1107 | conserved hypothetical membrane-spanning protein           | 4.2E-16  | MTH_670  | unknown                                                           | 2.4E-11  |
| MSM1403 | NONE     |                                                            |          | NONE     |                                                                   |          |
| MSM1404 | Msp_0243 | FwdB                                                       | 5.2E-23  | NONE     | formate dehydrogenase, alpha subunit homolog                      | 1.9E-153 |
| MSM1405 | Msp_0639 | FdhB                                                       | 5.0E-84  | NONE     | formate dehydrogenase, beta subunit related protein FlpB          | 7.8E-84  |
| MSM1406 | Msp_0384 | predicted Fe-S oxidoreductase                              | 2.7E-19  | MTH_1550 | molybdenum cofactor biosynthesis MoaA                             | 2.6E-99  |
| MSM1407 | Msp_0488 | predicted allosteric regulator of homoserine dehydrogenase | 9.7E-04  | MTH_1551 | molybdopterin-guanine dinucleotide biosynthesis protein B related | 2.3E-36  |
| MSM1408 | Msp_0147 | ferredoxin                                                 | 7.5E-10  | NONE     | tungsten formylmethanofuran dehydrogenase, subunit H              | 8.3E-48  |
| MSM1409 | Msp_1447 | EhbK                                                       | 6.0E-18  | NONE     | tungsten formylmethanofuran dehydrogenase, subunit F              | 3.1E-97  |
| MSM1410 | Msp_0241 | FwdG                                                       | 1.8E-22  | NONE     | tungsten formylmethanofuran dehydrogenase, subunit G              | 2.7E-19  |
| MSM1411 | Msp_0242 | FwdD                                                       | 5.4E-39  | NONE     | tungsten formylmethanofuran dehydrogenase, subunit D              | 6.9E-21  |
| MSM1412 | Msp_0243 | FwdB                                                       | 1.6E-156 | NONE     | tungsten formylmethanofuran dehydrogenase, subunit B              | 5.3E-117 |
| MSM1413 | Msp_0244 | FwdA                                                       | 6.4E-203 | NONE     | tungsten formylmethanofuran dehydrogenase, subunit A              | 1.7E-182 |
| MSM1414 | Msp_0245 | FwdC                                                       | 1.9E-66  | NONE     | tungsten formylmethanofuran dehydrogenase, subunit C              | 2.9E-52  |
| MSM1415 | Msp_0246 | hypothetical protein                                       | 3.9E-13  | MTH_1568 | unknown                                                           | 1.1E-08  |
| MSM1416 | Msp_0246 | hypothetical protein                                       | 6.8E-09  | MTH_1568 | unknown                                                           | 1.6E-05  |
| MSM1417 | Msp_0235 | conserved hypothetical membrane-spanning protein           | 2.9E-150 | MTH_1569 | conserved protein                                                 | 6.5E-151 |
| MSM1418 | Msp_0234 | GlnA                                                       | 3.8E-157 | MTH_1570 | glutamine synthetase                                              | 4.7E-164 |
| MSM1419 | Msp_0017 | conserved hypothetical protein                             | 1.7E-28  | NONE     |                                                                   |          |
| MSM1420 | Msp_0128 | predicted helicase                                         | 5.7E-11  | MTH_511  | DNA helicase II                                                   | 1.5E-13  |
| MSM1421 | Msp_1566 | conserved hypothetical membrane-spanning protein           | 4.4E-92  | NONE     |                                                                   |          |
| MSM1422 | Msp_1568 | conserved hypothetical membrane-spanning protein           | 3.5E-67  | NONE     |                                                                   |          |
| MSM1423 | Msp_0721 | partially conserved hypothetical protein                   | 5.9E-42  | NONE     |                                                                   |          |
| MSM1424 | Msp_0720 | polyphosphate kinase                                       | 2.4E-258 | NONE     |                                                                   |          |
| MSM1425 | Msp_0871 | 30S ribosomal protein S13P                                 | 7.7E-56  | MTH_34   | ribosomal protein S18 (E.coli )                                   | 2.9E-54  |
| MSM1426 | Msp_0870 | 30S ribosomal protein S4P                                  | 6.5E-59  | MTH_35   | ribosomal protein S9 (E.coli )                                    | 4.4E-65  |
| MSM1427 | Msp_0869 | 30S ribosomal protein S11P                                 | 2.5E-59  | MTH_36   | ribosomal protein S14 (E.coli )                                   | 2.9E-61  |

|         |          |                                                                                                       |          |          |                                                                  |          |
|---------|----------|-------------------------------------------------------------------------------------------------------|----------|----------|------------------------------------------------------------------|----------|
| MSM1428 | Msp_0868 | RpoD                                                                                                  | 6.3E-61  | NONE     | DNA-dependent RNA polymerase, subunit D                          | 9.1E-74  |
| MSM1429 | Msp_0867 | 50S ribosomal protein L18e                                                                            | 1.1E-33  | MTH_38   | ribosomal protein L18 (E.coli )                                  | 5.5E-35  |
| MSM1430 | Msp_0866 | 50S ribosomal protein L13P                                                                            | 1.3E-51  | MTH_39   | ribosomal protein S16 (E.coli )                                  | 7.1E-58  |
| MSM1431 | Msp_0865 | 30S ribosomal protein S9P                                                                             | 2.9E-56  | MTH_39   | ribosomal protein S16 (E.coli )                                  | 1.3E-56  |
| MSM1432 | Msp_0864 | RpoN                                                                                                  | 9.4E-19  | NONE     | DNA-dependent RNA polymerase, subunit N                          | 1.3E-24  |
| MSM1433 | Msp_0863 | RpoK                                                                                                  | 6.9E-16  | NONE     | DNA-dependent RNA polymerase, subunit K                          | 2.4E-18  |
| MSM1434 | NONE     |                                                                                                       |          | NONE     |                                                                  |          |
| MSM1435 | Msp_0862 | enolase                                                                                               | 2.2E-113 | MTH_43   | enolase                                                          | 3.0E-121 |
| MSM1436 | Msp_0861 | ferredoxin                                                                                            | 3.0E-15  | MTH_1106 | ferredoxin                                                       | 6.2E-20  |
| MSM1437 | Msp_0860 | ribosomal protein S2P                                                                                 | 3.9E-84  | MTH_44   | ribosomal protein Sa (E.coli )                                   | 5.5E-83  |
| MSM1438 | Msp_0859 | conserved hypothetical protein                                                                        | 1.9E-59  | MTH_45   | conserved protein                                                | 5.1E-64  |
| MSM1439 | Msp_0858 | putative mevalonate kinase                                                                            | 2.1E-60  | MTH_46   | mevalonate kinase                                                | 4.6E-63  |
| MSM1440 | Msp_0857 | predicted archaeal kinase                                                                             | 9.2E-60  | MTH_47   | conserved protein                                                | 3.6E-70  |
| MSM1441 | Msp_0856 | isopentenyl-diphosphate delta-isomerase                                                               | 6.2E-118 | MTH_48   | conserved protein                                                | 4.1E-117 |
| MSM1442 | Msp_0855 | predicted hydrolase                                                                                   | 8.3E-178 | MTH_49   | conserved protein                                                | 8.6E-188 |
| MSM1443 | Msp_0854 | IdsA                                                                                                  | 1.3E-90  | MTH_50   | bifunctional short chain isoprenyl diphosphate synthase          | 4.1E-94  |
| MSM1444 | NONE     |                                                                                                       |          | NONE     |                                                                  |          |
| MSM1445 | Msp_1125 | predicted transcriptional regulator                                                                   | 1.4E-38  | MTH_1454 | conserved protein                                                | 2.9E-45  |
| MSM1446 | Msp_1126 | putative hydroxylamine reductase                                                                      | 1.8E-152 | MTH_1453 | 6Fe-6S prismane-containing protein                               | 3.6E-173 |
| MSM1447 | Msp_0002 | conserved hypothetical protein                                                                        | 1.1E-31  | MTH_1452 | unknown                                                          | 2.3E-36  |
| MSM1448 | Msp_1545 | conserved hypothetical protein                                                                        | 1.9E-08  | MTH_146  | precorrin-8W decarboxylase                                       | 1.7E-05  |
| MSM1449 | Msp_0219 | conserved hypothetical protein                                                                        | 7.9E-04  | MTH_83   | O-linked GlcNAc transferase                                      | 9.2E-05  |
| MSM1450 | Msp_0524 | predicted oxidoreductase                                                                              | 8.4E-25  | MTH_907  | conserved protein                                                | 6.8E-08  |
| MSM1451 | Msp_0039 | predicted glycosyltransferase                                                                         | 2.2E-06  | MTH_83   | O-linked GlcNAc transferase                                      | 3.2E-10  |
| MSM1452 | Msp_0923 | Gltx                                                                                                  | 1.1E-184 | MTH_51   | glutamyl-tRNA synthetase                                         | 8.5E-181 |
| MSM1453 | NONE     |                                                                                                       |          | NONE     |                                                                  |          |
| MSM1454 | Msp_0226 | hypothetical protein                                                                                  | 9.5E-14  | NONE     | heterodisulfide reductase, subunit C                             | 6.6E-06  |
| MSM1455 | Msp_0924 | predicted aspartate/tyrosine/aromatic aminotransferase                                                | 3.8E-166 | MTH_52   | aspartate aminotransferase related protein                       | 6.6E-158 |
| MSM1456 | NONE     |                                                                                                       |          | NONE     |                                                                  |          |
| MSM1457 | NONE     |                                                                                                       |          | NONE     |                                                                  |          |
| MSM1458 | NONE     |                                                                                                       |          | NONE     |                                                                  |          |
| MSM1459 | Msp_0925 | predicted arabinose efflux permease                                                                   | 7.3E-115 | MTH_195  | efflux pump antibiotic resistance protein                        | 7.7E-93  |
| MSM1460 | Msp_1447 | EhbK                                                                                                  | 1.8E-33  | MTH_1133 | polyferredoxin (MvhB)                                            | 5.8E-143 |
| MSM1461 | Msp_0638 | MvhD2                                                                                                 | 1.3E-53  | NONE     | methyl viologen-reducing hydrogenase, delta subunit homolog FlpD | 2.7E-58  |
| MSM1462 | Msp_0639 | FdhB                                                                                                  | 1.2E-119 | NONE     | formate dehydrogenase, beta subunit related protein FlpB         | 1.9E-135 |
| MSM1463 | Msp_0640 | FdhA                                                                                                  | 4.1E-50  | NONE     | formate dehydrogenase, alpha subunit related protein FlpC        | 2.0E-39  |
| MSM1464 | NONE     |                                                                                                       |          | MTH_1141 | conserved protein (FlpE)                                         | 1.2E-18  |
| MSM1465 | Msp_0925 | predicted arabinose efflux permease                                                                   | 1.3E-115 | MTH_195  | efflux pump antibiotic resistance protein                        | 9.5E-95  |
| MSM1466 | NONE     |                                                                                                       |          | NONE     |                                                                  |          |
| MSM1467 | NONE     |                                                                                                       |          | NONE     |                                                                  |          |
| MSM1468 | Msp_0986 | PurA                                                                                                  | 7.6E-136 | MTH_615  | adenylosuccinate synthetase                                      | 9.4E-143 |
| MSM1469 | Msp_1164 | predicted ABC-type nitrate/sulfonate/bicarbonate transport system, periplasmic solute-binding protein | 2.4E-91  | MTH_924  | molybdate-binding periplasmic protein                            | 5.9E-06  |
| MSM1470 | NONE     |                                                                                                       |          | NONE     |                                                                  |          |
| MSM1471 | Msp_0919 | predicted acyl-CoA synthetase                                                                         | 2.3E-237 | NONE     | succinyl-CoA synthetase, alpha subunit                           | 2.5E-07  |
| MSM1472 | NONE     |                                                                                                       |          | MTH_752  | conserved protein                                                | 3.7E-77  |
| MSM1473 | Msp_0575 | predicted metal-dependent hydrolase                                                                   | 2.9E-79  | MTH_751  | conserved protein                                                | 9.4E-72  |
| MSM1474 | Msp_0579 | AroC                                                                                                  | 7.2E-124 | MTH_748  | chorismate synthase                                              | 4.7E-125 |
| MSM1475 | Msp_0497 | putative endonuclease III                                                                             | 1.0E-14  | MTH_746  | endonuclease III related protein                                 | 2.1E-51  |
| MSM1476 | Msp_0416 | HemB                                                                                                  | 6.2E-102 | MTH_744  | porphobilinogen synthase                                         | 3.6E-102 |

|         |          |                                                           |          |          |                                                                |          |
|---------|----------|-----------------------------------------------------------|----------|----------|----------------------------------------------------------------|----------|
| MSM1477 | Msp_0428 | predicted ATP:dephospho-CoA triphosphoribosyl transferase | 1.7E-58  | MTH_743  | conserved protein                                              | 5.9E-70  |
| MSM1478 | Msp_0429 | PheS                                                      | 2.6E-165 | MTH_742  | phenylalanyl-tRNA synthetase                                   | 5.5E-170 |
| MSM1479 | NONE     |                                                           |          | MTH_212  | exodeoxyribonuclease                                           | 2.4E-73  |
| MSM1480 | Msp_1260 | predicted hydrolase                                       | 1.5E-59  | MTH_209  | conserved protein                                              | 1.1E-77  |
| MSM1481 | Msp_1281 | conserved hypothetical protein                            | 6.5E-59  | MTH_208  | DNA-dependent DNA polymerase family B (PolB2)                  | 2.0E-69  |
| MSM1482 | NONE     |                                                           |          | NONE     |                                                                |          |
| MSM1483 | Msp_0195 | ABC-type multidrug transport system, ATP-binding protein  | 2.0E-41  | MTH_1093 | ABC transporter (ATP-binding                                   | 1.4E-54  |
| MSM1484 | Msp_0196 | ABC-type multidrug transport system, permease protein     | 8.1E-29  | MTH_1486 | conserved protein                                              | 1.0E-19  |
| MSM1485 | Msp_0440 | member of asn/thr-rich large protein family               | 3.3E-06  | NONE     |                                                                |          |
| MSM1486 | Msp_1280 | 30S ribosomal protein S8e                                 | 6.6E-34  | MTH_207  | ribosomal protein S8                                           | 1.5E-41  |
| MSM1487 | NONE     |                                                           |          | MTH_199  | unknown                                                        | 9.6E-31  |
| MSM1488 | Msp_0977 | conserved hypothetical protein                            | 3.1E-27  | MTH_200  | cobalamin biosynthesis protein M related protein               | 3.0E-50  |
| MSM1489 | Msp_0474 | hypothetical protein                                      | 1.2E-09  | MTH_1346 | unknown                                                        | 1.3E-177 |
| MSM1490 | Msp_0474 | hypothetical protein                                      | 7.1E-06  | MTH_201  | unknown                                                        | 4.9E-11  |
| MSM1491 | Msp_0474 | hypothetical protein                                      | 9.8E-08  | MTH_1346 | unknown                                                        | 1.3E-159 |
| MSM1492 | Msp_1279 | HypE1                                                     | 1.0E-122 | MTH_205  | hydrogenase expression/formation protein HypE                  | 3.2E-126 |
| MSM1493 | Msp_1278 | conserved hypothetical membrane-spanning protein          | 1.3E-21  | MTH_204  | conserved protein                                              | 4.3E-19  |
| MSM1494 | NONE     |                                                           |          | NONE     |                                                                |          |
| MSM1495 | Msp_1089 | predicted nuclease                                        | 1.8E-40  | MTH_494  | thermonuclease precursor                                       | 8.5E-39  |
| MSM1496 | Msp_0024 | hypothetical protein                                      | 4.5E-67  | NONE     |                                                                |          |
| MSM1497 | NONE     |                                                           |          | MTH_1785 | coenzyme PQQ synthesis protein                                 | 6.4E-57  |
| MSM1498 | Msp_1228 | predicted helicase                                        | 2.1E-131 | NONE     | ATP-dependent RNA helicase, eIF-4A family                      | 3.8E-114 |
| MSM1499 | Msp_1188 | predicted transcriptional regulator                       | 8.1E-61  | MTH_163  | conserved protein                                              | 2.5E-62  |
| MSM1500 | Msp_1189 | RecJ                                                      | 1.5E-114 | MTH_164  | single-stranded DNA exonuclease RecJ related protein           | 1.1E-116 |
| MSM1501 | Msp_1190 | signal recognition particle, 19 kDa protein               | 4.0E-20  | MTH_165  | signal recognition particle 19 kDa protein                     | 9.3E-17  |
| MSM1502 | Msp_0223 | predicted UDP-galactopyranose mutase                      | 3.6E-65  | MTH_344  | UDP-galactopyranose mutase                                     | 2.4E-80  |
| MSM1503 | Msp_0215 | predicted glycosyltransferase                             | 4.0E-39  | MTH_884  | teichoic acid biosynthesis related protein                     | 2.4E-06  |
| MSM1504 | Msp_1191 | HemD                                                      | 2.2E-49  | MTH_166  | uroporphyrinogen III synthase                                  | 1.1E-52  |
| MSM1505 | NONE     |                                                           |          | NONE     |                                                                |          |
| MSM1506 | NONE     |                                                           |          | NONE     |                                                                |          |
| MSM1507 | Msp_0215 | predicted glycosyltransferase                             | 5.6E-34  | MTH_884  | teichoic acid biosynthesis related protein                     | 7.4E-10  |
| MSM1508 | NONE     |                                                           |          | NONE     |                                                                |          |
| MSM1509 | NONE     |                                                           |          | NONE     |                                                                |          |
| MSM1510 | NONE     |                                                           |          | NONE     |                                                                |          |
| MSM1511 | NONE     |                                                           |          | NONE     |                                                                |          |
| MSM1512 | Msp_0060 | putative lipooligosaccharide cholinephosphotransferase    | 7.0E-62  | NONE     |                                                                |          |
| MSM1513 | Msp_0662 | putative aspartate aminotransferase                       | 2.7E-37  | MTH_1601 | aspartate aminotransferase                                     | 1.9E-41  |
| MSM1514 | Msp_1333 | predicted dehydrogenase                                   | 1.3E-06  | NONE     | 3-chlorobenzoate-3,4-dioxygenase dyhydrogenase related protein | 8.7E-09  |
| MSM1515 | Msp_0060 | putative lipooligosaccharide cholinephosphotransferase    | 1.1E-24  | NONE     |                                                                |          |
| MSM1516 | Msp_1326 | HisC                                                      | 1.7E-26  | MTH_1587 | histidinol-phosphate aminotransferase                          | 5.5E-22  |
| MSM1517 | NONE     |                                                           |          | MTH_1495 | ornithine cyclodeaminase                                       | 1.2E-15  |
| MSM1518 | Msp_0017 | conserved hypothetical protein                            | 1.2E-11  | NONE     |                                                                |          |
| MSM1519 | NONE     |                                                           |          | NONE     |                                                                |          |
| MSM1520 | NONE     |                                                           |          | NONE     |                                                                |          |
| MSM1521 | NONE     |                                                           |          | NONE     |                                                                |          |
| MSM1522 | NONE     |                                                           |          | NONE     |                                                                |          |
| MSM1523 | NONE     |                                                           |          | NONE     |                                                                |          |
| MSM1524 | NONE     |                                                           |          | NONE     |                                                                |          |
| MSM1525 | NONE     |                                                           |          | NONE     |                                                                |          |



|         |          |                                                                |          |          |                                                            |          |
|---------|----------|----------------------------------------------------------------|----------|----------|------------------------------------------------------------|----------|
| MSM1526 | Msp_0772 | hypothetical membrane-spanning protein                         | 2.3E-15  | MTH_252  | conserved protein                                          | 7.1E-19  |
| MSM1527 | NONE     |                                                                |          | NONE     |                                                            |          |
| MSM1528 | Msp_0608 | predicted transcriptional regulator                            | 1.9E-04  | MTH_700  | conserved protein                                          | 1.1E-04  |
| MSM1529 | NONE     |                                                                |          | NONE     |                                                            |          |
| MSM1530 | NONE     |                                                                |          | NONE     |                                                            |          |
| MSM1531 | Msp_0691 | predicted Na <sup>+</sup> -dependent transporter               | 1.3E-131 | NONE     |                                                            |          |
| MSM1532 | Msp_0691 | predicted Na <sup>+</sup> -dependent transporter               | 2.0E-137 | NONE     |                                                            |          |
| MSM1533 | Msp_1465 | member of asn/thr-rich large protein family                    | 7.2E-12  | MTH_1074 | putative membrane protein                                  | 3.7E-06  |
| MSM1534 | Msp_0590 | member of asn/thr-rich large protein family                    | 2.0E-24  | MTH_1074 | putative membrane protein                                  | 3.0E-123 |
| MSM1535 | Msp_1114 | predicted dTDP-D-glucose 4,6-dehydratase                       | 1.3E-10  | NONE     | dTDP-glucose 4,6-dehydratase                               | 1.2E-06  |
| MSM1536 | Msp_0290 | predicted pyridoxal phosphate-dependent enzyme                 | 6.9E-71  | MTH_1188 | pleiotropic regulatory protein DegT                        | 6.6E-71  |
| MSM1537 | Msp_0310 | predicted GTP:adenosylcobinamide-phosphate quanylyltransferase | 4.2E-04  | NONE     |                                                            |          |
| MSM1538 | Msp_1202 | predicted acetyltransferase                                    | 1.9E-08  | NONE     | N-terminal acetyltransferase complex, subunit ARD1         | 3.5E-06  |
| MSM1539 | NONE     |                                                                |          | NONE     |                                                            |          |
| MSM1540 | NONE     |                                                                |          | MTH_368  | glycerol-3-phosphate dehydrogenase (NAD)                   | 6.5E-48  |
| MSM1541 | NONE     |                                                                |          | NONE     |                                                            |          |
| MSM1542 | Msp_0310 | predicted GTP:adenosylcobinamide-phosphate quanylyltransferase | 4.6E-06  | MTH_1152 | conserved protein                                          | 1.4E-04  |
| MSM1543 | NONE     |                                                                |          | NONE     |                                                            |          |
| MSM1544 | Msp_0060 | putative lipooligosaccharide cholinephosphotransferase         | 3.9E-22  | NONE     |                                                            |          |
| MSM1545 | Msp_0495 | predicted glycosyltransferase                                  | 1.3E-31  | MTH_136  | dolichyl-phosphate mannose synthase                        | 1.4E-08  |
| MSM1546 | NONE     |                                                                |          | NONE     |                                                            |          |
| MSM1547 | Msp_1195 | PurC                                                           | 3.9E-77  | MTH_170  | phosphoribosylaminoimidazolesuccinocarboxamide synthase    | 6.8E-69  |
| MSM1548 | Msp_1194 | predicted phosphoribosylformylglycinamide synthase             | 1.2E-25  | MTH_169  | conserved protein                                          | 4.5E-24  |
| MSM1549 | Msp_1193 | PurQ                                                           | 2.4E-75  | MTH_168  | phosphoribosylformylglycinamide synthase I                 | 6.8E-85  |
| MSM1550 | Msp_1192 | CobA                                                           | 6.2E-86  | MTH_167  | S-adenosyl-L-methionine uroporphyrinogen methyltransferase | 7.1E-90  |
| MSM1551 | Msp_1196 | GlmS                                                           | 1.5E-201 | MTH_171  | glutamine-fructose-6-phosphate transaminase                | 1.5E-208 |
| MSM1552 | NONE     |                                                                |          | NONE     |                                                            |          |
| MSM1553 | NONE     |                                                                |          | NONE     |                                                            |          |
| MSM1554 | Msp_0141 | member of asn/thr-rich large protein family                    | 1.1E-09  | NONE     |                                                            |          |
| MSM1555 | Msp_0076 | conserved hypothetical protein                                 | 3.5E-60  | MTH_175  | conserved protein                                          | 4.7E-77  |
| MSM1556 | Msp_1344 | conserved hypothetical membrane-spanning protein               | 6.5E-75  | NONE     |                                                            |          |
| MSM1557 | Msp_0520 | predicted queuine/archaeosine tRNA-ribosyltransferase          | 5.0E-219 | MTH_176  | tRNA-guanine transglycosylase                              | 1.2E-206 |
| MSM1558 | NONE     |                                                                |          | MTH_1329 | methyltransferase related protein                          | 3.1E-04  |
| MSM1559 | Msp_0063 | predicted polysaccharide biosynthesis protein                  | 9.5E-74  | MTH_379  | O-antigen transporter related protein                      | 1.7E-72  |
| MSM1560 | Msp_0448 | predicted polysaccharide biosynthesis protein                  | 1.3E-78  | MTH_379  | O-antigen transporter related protein                      | 4.9E-75  |
| MSM1561 | Msp_0117 | predicted 3-hydroxy-3-methylglutaryl CoA synthase              | 3.6E-145 | MTH_792  | 3-hydroxy-3-methylglutaryl-CoA-synthase                    | 3.4E-145 |
| MSM1562 | Msp_0116 | predicted thiolase                                             | 2.1E-156 | MTH_793  | lipid-transfer protein (sterol or nonspecific)             | 3.5E-168 |
| MSM1563 | NONE     |                                                                |          | NONE     |                                                            |          |
| MSM1564 | Msp_0087 | CbiT                                                           | 4.6E-05  | NONE     |                                                            |          |
| MSM1565 | Msp_1226 | CobQ                                                           | 9.4E-154 | MTH_787  | cobyric acid synthase                                      | 1.1E-162 |
| MSM1566 | Msp_0233 | conserved hypothetical protein                                 | 2.3E-22  | NONE     |                                                            |          |
| MSM1567 | Msp_0762 | member of asn/thr-rich large protein family                    | 7.2E-35  | MTH_1485 | serine/threonine protein kinase related protein            | 5.1E-13  |
| MSM1568 | NONE     |                                                                |          | NONE     |                                                            |          |
| MSM1569 | Msp_1227 | predicted ATP-dependent protease                               | 2.4E-226 | MTH_785  | ATP-dependent protease LA                                  | 9.0E-241 |
| MSM1570 | Msp_0557 | hypothetical protein                                           | 1.1E-127 | MTH_530  | UDP-N-acetylmuramyl tripeptide synthetase related protein  | 2.6E-25  |
| MSM1571 | NONE     |                                                                |          | NONE     |                                                            |          |
| MSM1572 | Msp_0683 | hypothetical protein                                           | 4.9E-61  | NONE     |                                                            |          |

|         |          |                                                                                        |          |          |                                                            |          |
|---------|----------|----------------------------------------------------------------------------------------|----------|----------|------------------------------------------------------------|----------|
| MSM1573 | NONE     |                                                                                        |          | NONE     |                                                            |          |
| MSM1574 | Msp_0797 | predicted nitroreductase                                                               | 6.3E-10  | MTH_120  | NADPH-oxidoreductase                                       | 4.2E-11  |
| MSM1575 | Msp_1055 | hypothetical membrane-spanning protein                                                 | 7.8E-04  | MTH_521  | unknown                                                    | 8.2E-05  |
| MSM1576 | NONE     |                                                                                        |          | NONE     |                                                            |          |
| MSM1577 | Msp_1229 | ribose-phosphate pyrophosphokinase                                                     | 1.2E-84  | MTH_784  | ribose-phosphate pyrophosphokinase                         | 1.0E-88  |
| MSM1578 | NONE     |                                                                                        |          | NONE     |                                                            |          |
| MSM1579 | Msp_0573 | UvrB                                                                                   | 1.2E-247 | MTH_442  | excinuclease ABC subunit B                                 | 1.2E-261 |
| MSM1580 | NONE     |                                                                                        |          | NONE     |                                                            |          |
| MSM1581 | Msp_0574 | UvrA                                                                                   | 0.0E+00  | MTH_443  | excinuclease ABC subunit A                                 | 0.0E+00  |
| MSM1582 | Msp_0603 | conserved hypothetical membrane-spanning protein                                       | 5.6E-85  | MTH_465  | unknown                                                    | 4.8E-84  |
| MSM1583 | Msp_1178 | predicted helicase                                                                     | 7.4E-193 | MTH_656  | ATP-dependent RNA helicase related protein                 | 2.1E-232 |
| MSM1584 | Msp_1119 | conserved hypothetical protein                                                         | 1.0E-37  | MTH_641  | conserved protein                                          | 2.9E-29  |
| MSM1585 | Msp_0983 | member of asn/thr-rich large protein family                                            | 5.5E-38  | MTH_911  | probable surface protein                                   | 9.9E-06  |
| MSM1586 | Msp_0713 | member of asn/thr-rich large protein family                                            | 1.8E-52  | MTH_911  | probable surface protein                                   | 3.7E-14  |
| MSM1587 | Msp_0590 | member of asn/thr-rich large protein family                                            | 6.0E-44  | MTH_716  | cell surface glycoprotein (s-layer protein)                | 1.2E-06  |
| MSM1588 | NONE     |                                                                                        |          | NONE     |                                                            |          |
| MSM1589 | NONE     |                                                                                        |          | NONE     |                                                            |          |
| MSM1590 | Msp_0619 | member of asn/thr-rich large protein family                                            | 2.5E-48  | MTH_716  | cell surface glycoprotein (s-layer protein)                | 1.3E-07  |
| MSM1591 | Msp_1118 | conserved hypothetical protein                                                         | 1.0E-37  | MTH_639  | conserved protein                                          | 5.6E-42  |
| MSM1592 | Msp_0205 | predicted ABC-type polysaccharide/polyol phosphate export system, ATP-binding protein  | 9.8E-72  | MTH_1370 | ABC transporter (ATP-binding protein)                      | 1.5E-20  |
| MSM1593 | Msp_0204 | predicted ABC-type polysaccharide/polyol phosphate export system, permease protein     | 1.3E-53  | MTH_1092 | putative membrane protein                                  | 5.7E-11  |
| MSM1594 | Msp_0442 | predicted glycosyltransferase                                                          | 4.4E-60  | MTH_884  | teichoic acid biosynthesis related protein                 | 1.5E-07  |
| MSM1595 | Msp_0929 | predicted helicase                                                                     | 6.7E-04  | NONE     |                                                            |          |
| MSM1596 | Msp_0017 | conserved hypothetical protein                                                         | 1.7E-28  | NONE     |                                                            |          |
| MSM1597 | NONE     |                                                                                        |          | NONE     |                                                            |          |
| MSM1598 | NONE     |                                                                                        |          | NONE     |                                                            |          |
| MSM1599 | NONE     |                                                                                        |          | NONE     |                                                            |          |
| MSM1600 | NONE     |                                                                                        |          | NONE     |                                                            |          |
| MSM1601 | Msp_0692 | hypothetical membrane-spanning protein                                                 | 1.3E-07  | NONE     |                                                            |          |
| MSM1602 | Msp_0220 | predicted glycosyltransferase                                                          | 6.9E-20  | MTH_361  | teichoic acid biosynthesis protein RodC related protein    | 1.7E-04  |
| MSM1603 | NONE     |                                                                                        |          | MTH_637  | conserved protein                                          | 1.1E-20  |
| MSM1604 | Msp_1101 | predicted UDP-glucose pyrophosphorylase                                                | 1.2E-103 | MTH_634  | UTP--glucose-1-phosphate uridylyltransferase               | 7.6E-109 |
| MSM1605 | NONE     |                                                                                        |          | NONE     |                                                            |          |
| MSM1606 | Msp_0612 | predicted arylsulfatase regulatory protein                                             | 4.8E-102 | MTH_114  | arylsulfatase regulatory protein                           | 1.9E-64  |
| MSM1607 | Msp_1060 | hypothetical protein                                                                   | 2.4E-13  | MTH_121  | unknown                                                    | 1.2E-05  |
| MSM1608 | Msp_1350 | putative oxidoreductase                                                                | 5.9E-97  | MTH_907  | conserved protein                                          | 8.1E-50  |
| MSM1609 | NONE     |                                                                                        |          | MTH_924  | molybdate-binding periplasmic protein                      | 6.6E-23  |
| MSM1610 | Msp_0342 | PstC                                                                                   | 1.1E-15  | MTH_921  | anion transport system permease protein                    | 6.4E-25  |
| MSM1611 | Msp_1000 | predicted ABC-type nitrate/sulfonate/bicarbonate transport system, ATB-binding protein | 1.7E-28  | MTH_920  | anion permease                                             | 2.4E-34  |
| MSM1612 | Msp_0210 | predicted UDP-glucose 6-dehydrogenase                                                  | 6.3E-93  | MTH_836  | UDP-N-acetyl-D-mannosaminuronic acid dehydrogenase         | 5.4E-24  |
| MSM1613 | NONE     |                                                                                        |          | NONE     |                                                            |          |
| MSM1614 | Msp_0394 | predicted transcriptional regulator                                                    | 1.3E-74  | MTH_126  | inosine-5'-monophosphate dehydrogenase related protein VII | 2.1E-97  |
| MSM1615 | Msp_0395 | putative deoxyhypusine synthase                                                        | 7.4E-106 | MTH_127  | deoxyhypusine synthase                                     | 4.6E-95  |
| MSM1616 | Msp_0396 | hypothetical membrane-spanning protein                                                 | 4.0E-27  | MTH_128  | unknown                                                    | 6.2E-27  |
| MSM1617 | Msp_0397 | PyrF                                                                                   | 1.9E-66  | MTH_129  | orotidine 5' monophosphate decarboxylase                   | 4.3E-67  |
| MSM1618 | Msp_0398 | CbiM1                                                                                  | 6.0E-72  | MTH_130  | cobalamin biosynthesis protein M                           | 9.5E-79  |
| MSM1619 | Msp_0399 | CbiN                                                                                   | 3.0E-31  | MTH_131  | cobalt transport protein N                                 | 7.2E-26  |

|         |          |                                          |          |          |                                                                                         |          |
|---------|----------|------------------------------------------|----------|----------|-----------------------------------------------------------------------------------------|----------|
| MSM1620 | Msp_0400 | CbiQ1                                    | 3.0E-38  | MTH_132  | cobalt transport protein Q                                                              | 3.4E-42  |
| MSM1621 | Msp_0401 | CbiO1                                    | 6.0E-88  | MTH_133  | cobalt transport ATP-binding protein O                                                  | 9.3E-88  |
| MSM1622 | Msp_1239 | RibC                                     | 6.9E-55  | MTH_134  | riboflavin synthase                                                                     | 2.3E-61  |
| MSM1623 | Msp_0541 | predicted glycosyltransferase            | 2.1E-46  | MTH_136  | dolichyl-phosphate mannose synthase                                                     | 6.1E-52  |
| MSM1624 | Msp_0542 | hypothetical membrane-spanning protein   | 9.4E-19  | MTH_137  | unknown                                                                                 | 1.2E-18  |
| MSM1625 | Msp_1044 | TfrB                                     | 3.2E-34  | MTH_1850 | fumarate reductase                                                                      | 7.6E-33  |
| MSM1626 | Msp_1044 | TfrB                                     | 3.0E-07  | MTH_140  | conserved protein                                                                       | 4.8E-107 |
| MSM1627 | Msp_0989 | predicted glycosyltransferase            | 9.5E-11  | MTH_377  | dolichyl-phosphate mannose synthase related protein                                     | 2.0E-11  |
| MSM1628 | Msp_0430 | conserved hypothetical protein           | 1.9E-75  | MTH_141  | conserved protein                                                                       | 7.0E-99  |
| MSM1629 | Msp_0431 | GuaB                                     | 2.1E-163 | MTH_142  | inosine-5'-monophosphate dehydrogenase                                                  | 1.5E-174 |
| MSM1630 | Msp_1253 | 50S ribosomal protein L37Ae              | 6.0E-33  | MTH_681  | ribosomal protein L37a                                                                  | 1.1E-36  |
| MSM1631 | NONE     |                                          |          | NONE     |                                                                                         |          |
| MSM1632 | Msp_1254 | partially conserved hypothetical protein | 1.0E-21  | MTH_680  | conserved protein                                                                       | 1.4E-15  |
| MSM1633 | Msp_1255 | conserved hypothetical protein           | 1.0E-12  | MTH_679  | unknown                                                                                 | 5.3E-14  |
| MSM1634 | Msp_1256 | partially conserved hypothetical protein | 2.5E-27  | MTH_678  | conserved protein                                                                       | 2.1E-35  |
| MSM1635 | NONE     |                                          |          | MTH_677  | unknown                                                                                 | 1.7E-10  |
| MSM1636 | Msp_1257 | conserved hypothetical protein           | 2.6E-39  | MTH_669  | phosphoribosylformimino-5-aminoimidazole carboxamide ribotide isomerase related protein | 1.3E-58  |
| MSM1637 | Msp_0173 | hypothetical membrane-spanning protein   | 9.9E-08  | NONE     |                                                                                         |          |
| MSM1638 | Msp_1259 | hypothetical membrane-spanning protein   | 1.6E-09  | MTH_667  | unknown                                                                                 | 3.0E-11  |
| MSM1639 | Msp_0519 | predicted Co/Zn/Cd cation transporter    | 4.1E-16  | MTH_1893 | cation efflux system protein (zinc/cadmium)                                             | 3.7E-17  |
| MSM1640 | Msp_0482 | hypothetical membrane-spanning protein   | 1.8E-38  | NONE     |                                                                                         |          |
| MSM1641 | NONE     |                                          |          | NONE     |                                                                                         |          |
| MSM1642 | NONE     |                                          |          | NONE     |                                                                                         |          |
| MSM1643 | NONE     |                                          |          | NONE     |                                                                                         |          |
| MSM1644 | NONE     |                                          |          | NONE     |                                                                                         |          |
| MSM1645 | NONE     |                                          |          | NONE     |                                                                                         |          |
| MSM1646 | NONE     |                                          |          | NONE     |                                                                                         |          |
| MSM1647 | NONE     |                                          |          | NONE     |                                                                                         |          |
| MSM1648 | NONE     |                                          |          | NONE     |                                                                                         |          |
| MSM1649 | NONE     |                                          |          | NONE     |                                                                                         |          |
| MSM1650 | Msp_0260 | hypothetical protein                     | 7.9E-04  | NONE     |                                                                                         |          |
| MSM1651 | NONE     |                                          |          | NONE     |                                                                                         |          |
| MSM1652 | NONE     |                                          |          | NONE     |                                                                                         |          |
| MSM1653 | NONE     |                                          |          | NONE     |                                                                                         |          |
| MSM1654 | NONE     |                                          |          | NONE     |                                                                                         |          |
| MSM1655 | Msp_1059 | hypothetical protein                     | 1.3E-05  | NONE     |                                                                                         |          |
| MSM1656 | NONE     |                                          |          | NONE     |                                                                                         |          |
| MSM1657 | Msp_0793 | hypothetical protein                     | 4.9E-06  | NONE     |                                                                                         |          |
| MSM1658 | NONE     |                                          |          | NONE     |                                                                                         |          |
| MSM1659 | NONE     |                                          |          | NONE     |                                                                                         |          |
| MSM1660 | NONE     |                                          |          | NONE     |                                                                                         |          |
| MSM1661 | NONE     |                                          |          | NONE     |                                                                                         |          |
| MSM1662 | NONE     |                                          |          | NONE     |                                                                                         |          |
| MSM1663 | NONE     |                                          |          | NONE     |                                                                                         |          |
| MSM1664 | NONE     |                                          |          | NONE     |                                                                                         |          |
| MSM1665 | NONE     |                                          |          | NONE     |                                                                                         |          |
| MSM1666 | Msp_0946 | conserved hypothetical protein           | 1.2E-05  | NONE     |                                                                                         |          |
| MSM1667 | NONE     |                                          |          | NONE     |                                                                                         |          |
| MSM1668 | NONE     |                                          |          | NONE     |                                                                                         |          |
| MSM1669 | NONE     |                                          |          | NONE     |                                                                                         |          |

|         |          |                                                            |          |          |                                                          |          |
|---------|----------|------------------------------------------------------------|----------|----------|----------------------------------------------------------|----------|
| MSM1670 | Msp_0113 | conserved hypothetical protein                             | 1.8E-04  | NONE     |                                                          |          |
| MSM1671 | NONE     |                                                            |          | NONE     |                                                          |          |
| MSM1672 | NONE     |                                                            |          | NONE     |                                                          |          |
| MSM1673 | Msp_0474 | hypothetical protein                                       | 4.6E-04  | NONE     |                                                          |          |
| MSM1674 | Msp_0822 | hypothetical protein                                       | 2.5E-04  | NONE     |                                                          |          |
| MSM1675 | NONE     |                                                            |          | NONE     |                                                          |          |
| MSM1676 | NONE     |                                                            |          | NONE     |                                                          |          |
| MSM1677 | NONE     |                                                            |          | NONE     |                                                          |          |
| MSM1678 | NONE     |                                                            |          | NONE     |                                                          |          |
| MSM1679 | NONE     |                                                            |          | NONE     |                                                          |          |
| MSM1680 | NONE     |                                                            |          | NONE     |                                                          |          |
| MSM1681 | NONE     |                                                            |          | NONE     |                                                          |          |
| MSM1682 | NONE     |                                                            |          | NONE     |                                                          |          |
| MSM1683 | NONE     |                                                            |          | NONE     |                                                          |          |
| MSM1684 | Msp_0912 | member of asn/thr-rich large protein family                | 2.1E-06  | MTH_412  | conserved protein                                        | 4.7E-04  |
| MSM1685 | NONE     |                                                            |          | NONE     |                                                          |          |
| MSM1686 | NONE     |                                                            |          | NONE     |                                                          |          |
| MSM1687 | Msp_0658 | hypothetical membrane-spanning protein                     | 8.1E-07  | MTH_1459 | unknown                                                  | 3.6E-07  |
| MSM1688 | NONE     |                                                            |          | NONE     |                                                          |          |
| MSM1689 | NONE     |                                                            |          | NONE     |                                                          |          |
| MSM1690 | NONE     |                                                            |          | NONE     |                                                          |          |
| MSM1691 | Msp_1039 | partially conserved hypothetical membrane-spanning protein | 1.5E-07  | MTH_357  | conserved protein                                        | 5.3E-08  |
| MSM1692 | NONE     |                                                            |          | NONE     |                                                          |          |
| MSM1693 | Msp_1258 | predicted ribokinase                                       | 6.9E-39  | MTH_668  | unknown                                                  | 1.8E-20  |
| MSM1694 | Msp_0929 | predicted helicase                                         | 3.6E-193 | MTH_487  | DNA helicase related protein                             | 4.9E-304 |
| MSM1695 | Msp_0572 | UvrC                                                       | 6.3E-164 | MTH_441  | excinuclease ABC subunit C                               | 5.6E-161 |
| MSM1696 | Msp_1548 | hypothetical protein                                       | 1.7E-08  | NONE     |                                                          |          |
| MSM1697 | NONE     |                                                            |          | NONE     |                                                          |          |
| MSM1698 | Msp_0439 | methyl-coenzyme M reductase, component A2-like protein     | 2.7E-147 | NONE     | methyl coenzyme M reductase system, component A2 homolog | 5.4E-179 |
| MSM1699 | Msp_0438 | predicted universal stress protein                         | 2.1E-14  | MTH_153  | conserved protein                                        | 5.4E-21  |
| MSM1700 | Msp_1061 | hypothetical protein                                       | 7.3E-12  | MTH_278  | ferredoxin                                               | 1.4E-20  |
| MSM1701 | Msp_1062 | predicted dehydrogenase                                    | 4.0E-130 | MTH_277  | bacteriochlorophyll synthase 43 kDa subunit              | 8.8E-147 |
| MSM1702 | Msp_1088 | ExoB                                                       | 7.9E-102 | MTH_631  | UDP-glucose 4-epimerase                                  | 3.5E-97  |
| MSM1703 | NONE     |                                                            |          | MTH_647  | unknown                                                  | 5.0E-25  |
| MSM1704 | Msp_1122 | PurF                                                       | 1.4E-143 | MTH_646  | amidophosphoribosyltransferase                           | 1.2E-156 |
| MSM1705 | Msp_1121 | predicted peptidase                                        | 2.4E-100 | MTH_645  | collagenase                                              | 3.7E-100 |
| MSM1706 | Msp_1513 | hypothetical membrane-spanning protein                     | 2.9E-24  | NONE     |                                                          |          |
| MSM1707 | Msp_1120 | NifH                                                       | 2.6E-96  | MTH_643  | nitrogenase NifH subunit                                 | 5.5E-99  |
| MSM1708 | NONE     |                                                            |          | NONE     |                                                          |          |
| MSM1709 | Msp_0440 | member of asn/thr-rich large protein family                | 1.3E-35  | MTH_716  | cell surface glycoprotein (s-layer protein)              | 2.4E-04  |
| MSM1710 | Msp_1277 | SerS                                                       | 1.9E-187 | MTH_1455 | threonyl-tRNA synthetase                                 | 5.3E-06  |
| MSM1711 | Msp_0725 | hypothetical protein                                       | 1.0E-08  | NONE     |                                                          |          |
| MSM1712 | Msp_0852 | predicted ferritin                                         | 8.4E-50  | MTH_158  | ferritin like protein (RsgA)                             | 2.3E-59  |
| MSM1713 | Msp_1008 | predicted regulatory protein                               | 5.4E-32  | MTH_162  | unknown                                                  | 1.5E-41  |
| MSM1714 | Msp_1040 | coenzyme F390 synthetase II                                | 6.3E-164 | MTH_161  | coenzyme F390 synthetase III                             | 3.7E-164 |
| MSM1715 | Msp_1110 | CobN                                                       | 1.7E-68  | MTH_714  | magnesium chelatase subunit                              | 0.0E+00  |
| MSM1716 | Msp_0590 | member of asn/thr-rich large protein family                | 2.5E-16  | MTH_717  | unknown                                                  | 3.9E-25  |
| MSM1717 | Msp_1105 | predicted transporter                                      | 1.9E-52  | MTH_672  | unknown                                                  | 2.3E-52  |
| MSM1718 | Msp_1106 | conserved hypothetical membrane-spanning protein           | 2.0E-50  | MTH_671  | unknown                                                  | 3.7E-61  |

|         |          |                                                           |          |          |                                                        |          |
|---------|----------|-----------------------------------------------------------|----------|----------|--------------------------------------------------------|----------|
| MSM1719 | Msp_1107 | conserved hypothetical membrane-spanning protein          | 4.1E-25  | MTH_670  | unknown                                                | 1.2E-32  |
| MSM1720 | Msp_1533 | RpoM1                                                     | 7.3E-28  | MTH_1314 | transcription elongation factor TFIIS                  | 8.6E-30  |
| MSM1721 | NONE     |                                                           |          | NONE     |                                                        |          |
| MSM1722 | Msp_0965 | predicted nitroreductase                                  | 6.9E-16  | MTH_120  | NADPH-oxidoreductase                                   | 7.3E-33  |
| MSM1723 | Msp_1238 | N(5),N(10)-methenyltetrahydromethanopterin cyclohydrolase | 6.7E-105 | NONE     | N5,N10-methenyl-tetrahydromethanopterin cyclohydrolase | 2.1E-138 |
| MSM1724 | Msp_0961 | hypothetical membrane-spanning protein                    | 3.1E-36  | MTH_1192 | conserved protein                                      | 9.2E-25  |
| MSM1725 | Msp_0961 | hypothetical membrane-spanning protein                    | 5.7E-28  | MTH_1192 | conserved protein                                      | 1.6E-30  |
| MSM1726 | Msp_0879 | hypothetical membrane-spanning protein                    | 9.0E-30  | MTH_1192 | conserved protein                                      | 1.3E-25  |
| MSM1727 | Msp_0844 | predicted multimeric flavodoxin                           | 1.2E-18  | MTH_135  | conserved protein                                      | 1.9E-18  |
| MSM1728 | NONE     |                                                           |          | NONE     |                                                        |          |
| MSM1729 | Msp_0587 | hypothetical membrane-spanning protein                    | 5.0E-29  | MTH_520  | unknown                                                | 3.9E-10  |
| MSM1730 | Msp_0607 | hypothetical membrane-spanning protein                    | 6.5E-20  | MTH_1192 | conserved protein                                      | 1.2E-26  |
| MSM1731 | Msp_0714 | predicted short chain dehydrogenase                       | 1.7E-115 | NONE     |                                                        |          |
| MSM1732 | Msp_1548 | hypothetical protein                                      | 8.2E-07  | NONE     |                                                        |          |
| MSM1733 | Msp_0789 | rubrerythrin                                              | 1.6E-39  | MTH_756  | rubrerythrin                                           | 3.3E-43  |
| MSM1734 | Msp_1237 | ThyA                                                      | 8.9E-28  | MTH_774  | thymidylate synthase                                   | 7.2E-26  |
| MSM1735 | Msp_0777 | member of asn/thr-rich large protein family               | 7.4E-116 | MTH_716  | cell surface glycoprotein (s-layer protein)            | 1.4E-06  |
| MSM1736 | NONE     |                                                           |          | NONE     |                                                        |          |
| MSM1737 | NONE     |                                                           |          | NONE     |                                                        |          |
| MSM1738 | Msp_0154 | member of asn/thr-rich large protein family               | 2.3E-06  | NONE     |                                                        |          |
| MSM1739 | Msp_0987 | hypothetical membrane-spanning protein                    | 2.7E-07  | MTH_521  | unknown                                                | 1.4E-05  |
| MSM1740 | Msp_1323 | conserved hypothetical protein                            | 1.1E-16  | MTH_83   | O-linked GlcNAc transferase                            | 4.7E-38  |
| MSM1741 | Msp_0113 | conserved hypothetical protein                            | 5.0E-05  | NONE     |                                                        |          |
| MSM1742 | Msp_0482 | hypothetical membrane-spanning protein                    | 2.7E-76  | NONE     |                                                        |          |
| MSM1743 | Msp_0113 | conserved hypothetical protein                            | 4.1E-06  | NONE     |                                                        |          |
| MSM1744 | NONE     |                                                           |          | NONE     |                                                        |          |
| MSM1745 | Msp_0344 | predicted phosphate uptake regulator                      | 2.0E-04  | NONE     |                                                        |          |
| MSM1746 | NONE     |                                                           |          | NONE     |                                                        |          |
| MSM1747 | Msp_0911 | member of asn/thr-rich large protein family               | 8.1E-06  | NONE     |                                                        |          |
| MSM1748 | NONE     |                                                           |          | NONE     |                                                        |          |
| MSM1749 | NONE     |                                                           |          | NONE     |                                                        |          |
| MSM1750 | NONE     |                                                           |          | NONE     |                                                        |          |
| MSM1751 | Msp_0113 | conserved hypothetical protein                            | 6.3E-15  | NONE     |                                                        |          |
| MSM1752 | Msp_0702 | conserved hypothetical protein                            | 1.2E-59  | MTH_1210 | mrr restriction system related protein                 | 3.4E-42  |
| MSM1753 | Msp_0465 | conserved hypothetical membrane-spanning protein          | 6.7E-04  | NONE     |                                                        |          |
| MSM1754 | Msp_1328 | putative ATP-dependent protease La                        | 3.6E-06  | NONE     |                                                        |          |
| MSM1755 | Msp_0219 | conserved hypothetical protein                            | 6.7E-04  | NONE     |                                                        |          |
| MSM1756 | Msp_0976 | hypothetical protein                                      | 2.8E-05  | NONE     |                                                        |          |
| MSM1757 | NONE     |                                                           |          | NONE     |                                                        |          |
| MSM1758 | NONE     |                                                           |          | NONE     |                                                        |          |
| MSM1759 | NONE     |                                                           |          | NONE     |                                                        |          |
| MSM1760 | NONE     |                                                           |          | NONE     |                                                        |          |
| MSM1761 | Msp_0113 | conserved hypothetical protein                            | 7.6E-07  | MTH_540  | intracellular protein transport protein                | 2.7E-05  |
| MSM1762 | NONE     |                                                           |          | NONE     |                                                        |          |
| MSM1763 | Msp_1533 | RpoM1                                                     | 4.6E-10  | MTH_1314 | transcription elongation factor TFIIS                  | 3.1E-09  |
| MSM1764 | Msp_0226 | hypothetical protein                                      | 8.9E-04  | NONE     |                                                        |          |
| MSM1765 | NONE     |                                                           |          | NONE     |                                                        |          |
| MSM1766 | Msp_1323 | conserved hypothetical protein                            | 4.8E-15  | MTH_83   | O-linked GlcNAc transferase                            | 3.4E-35  |
| MSM1767 | Msp_1548 | hypothetical protein                                      | 1.3E-04  | NONE     |                                                        |          |
| MSM1768 | NONE     |                                                           |          | NONE     |                                                        |          |

|         |          |                                                  |          |          |                             |         |
|---------|----------|--------------------------------------------------|----------|----------|-----------------------------|---------|
| MSM1769 | Msp_0724 | hypothetical membrane-spanning protein           | 2.1E-08  | MTH_1277 | unknown                     | 8.9E-05 |
| MSM1770 | Msp_0934 | conserved hypothetical membrane-spanning protein | 1.4E-17  | MTH_518  | conserved protein           | 3.4E-19 |
| MSM1771 | Msp_0128 | predicted helicase                               | 5.0E-19  | MTH_511  | DNA helicase II             | 1.1E-26 |
| MSM1772 | Msp_0725 | hypothetical protein                             | 4.0E-11  | MTH_470  | conserved protein           | 1.2E-04 |
| MSM1773 | Msp_1548 | hypothetical protein                             | 4.3E-07  | MTH_521  | unknown                     | 7.7E-05 |
| MSM1774 | NONE     |                                                  |          | NONE     |                             |         |
| MSM1775 | NONE     |                                                  |          | NONE     |                             |         |
| MSM1776 | NONE     |                                                  |          | NONE     |                             |         |
| MSM1777 | Msp_0799 | predicted transcriptional regulator              | 3.3E-05  | MTH_671  | unknown                     | 2.6E-04 |
| MSM1778 | Msp_0726 | hypothetical protein                             | 2.7E-69  | NONE     |                             |         |
| MSM1779 | Msp_0725 | hypothetical protein                             | 2.6E-119 | NONE     |                             |         |
| MSM1780 | Msp_1055 | hypothetical membrane-spanning protein           | 1.1E-10  | MTH_1277 | unknown                     | 2.7E-06 |
| MSM1781 | Msp_0725 | hypothetical protein                             | 2.4E-13  | MTH_470  | conserved protein           | 1.4E-05 |
| MSM1782 | NONE     |                                                  |          | NONE     |                             |         |
| MSM1783 | NONE     |                                                  |          | NONE     |                             |         |
| MSM1784 | NONE     |                                                  |          | NONE     |                             |         |
| MSM1785 | NONE     |                                                  |          | NONE     |                             |         |
| MSM1786 | Msp_1323 | conserved hypothetical protein                   | 4.1E-07  | MTH_83   | O-linked GlcNAc transferase | 6.9E-12 |
| MSM1787 | Msp_1323 | conserved hypothetical protein                   | 5.6E-09  | MTH_72   | O-linked GlcNAc transferase | 3.6E-16 |
| MSM1788 | Msp_1323 | conserved hypothetical protein                   | 7.3E-11  | MTH_83   | O-linked GlcNAc transferase | 2.0E-20 |
| MSM1789 | Msp_0757 | predicted ATPase                                 | 2.5E-08  | NONE     |                             |         |
| MSM1790 | Msp_0757 | predicted ATPase                                 | 4.9E-08  | NONE     |                             |         |
| MSM1791 | NONE     |                                                  |          | MTH_512  | unknown                     | 1.1E-25 |
| MSM1792 | Msp_0764 | predicted nicotinate phosphoribosyltransferase   | 1.7E-193 | NONE     |                             |         |
| MSM1793 | NONE     |                                                  |          | NONE     |                             |         |
| MSM1794 | Msp_1103 | member of asn/thr-rich large protein family      | 1.5E-04  | MTH_512  | unknown                     | 1.2E-24 |
| MSM1795 | Msp_0757 | predicted ATPase                                 | 1.7E-99  | NONE     |                             |         |
