# Supplementary material
Source: PubMed Central journal article supplement (PMC1965566)
Supplement: pnas_0704189104_17.pdf [file pnas_0704189104_17.pdf]

**Table 11. qRT-PCR analyses of *M. smithii* transcription *in vivo* in the presence or absence of *B. thetaiotaomicron* VPI-5482**

| Gene                         | Annotation                                                | Fold Difference <sup>1</sup> | SEM  | P-value       |
|------------------------------|-----------------------------------------------------------|------------------------------|------|---------------|
| <b>CELL SURFACE</b>          |                                                           |                              |      |               |
| MSM1539                      | sialic acid synthase, NeuB                                | 2.30                         | 0.79 | 0.23          |
| MSM1305                      | adhesin-like protein                                      | 1.84                         | 0.22 | <b>0.04</b>   |
| MSM1112                      | adhesin-like protein                                      | 1.31                         | 0.08 | 0.39          |
| MSM1113                      | adhesin-like protein                                      | 0.93                         | 0.09 | 0.85          |
| MSM0411                      | adhesin-like protein                                      | 0.65                         | 0.02 | <b>0.0006</b> |
| MSM1399                      | adhesin-like protein                                      | 0.60                         | 0.05 | <b>0.0008</b> |
| MSM0995                      | adhesin-like protein                                      | 0.55                         | 0.03 | <b>0.0009</b> |
| MSM1534                      | adhesin-like protein                                      | 0.52                         | 0.10 | <b>0.03</b>   |
| <b>METHANOGENESIS</b>        |                                                           |                              |      |               |
| MSM1381                      | putative alcohol dehydrogenase, Adh                       | 2.31                         | 0.62 | <b>0.003</b>  |
| MSM0049                      | F <sub>420</sub> -dependent NADP reductase, Fno           | 3.75                         | 0.41 | <b>0.006</b>  |
| MSM0515                      | methanol:cobalamin methyltransferase, MtaB                | 2.37                         | 0.32 | <b>0.01</b>   |
| MSM0848                      | ribofuranosylaminobenzene 5'-phosphate synthase, RfaS     | 4.62                         | 0.85 | <b>0.01</b>   |
| <b>CARBON ASSIMILATION</b>   |                                                           |                              |      |               |
| MSM0330                      | acetyl-CoA synthetase, Acs                                | 1.02                         | 0.36 | 0.76          |
| MSM0228                      | succinyl-CoA synthetase, alpha subunit, Suc               | 1.33                         | 0.24 | 0.31          |
| MSM0560                      | pyruvate:ferredoxin oxidoreductase, beta subunit, Por     | 4.92                         | 0.60 | <b>0.0006</b> |
| MSM0988                      | phosphoenolpyruvate synthase, PpsA                        | 2.72                         | 0.42 | <b>0.002</b>  |
| MSM0654                      | carbonic anhydrase, Cab                                   | 1.69                         | 0.10 | <b>0.005</b>  |
| MSM0991                      | bicarbonate ABC transporter, substrate-binding component, | 0.55                         | 0.05 | <b>0.005</b>  |
| MSM0291                      | bicarbonate ABC transporter, permease component, BtcB     | 0.45                         | 0.04 | <b>0.0006</b> |
| <b>NITROGEN ASSIMILATION</b> |                                                           |                              |      |               |
| MSM0234                      | ammonium transporter, AmtB                                | 2.88                         | 0.24 | <b>0.0002</b> |
| MSM0888                      | glutamate dehydrogenase, AdhA                             | 2.55                         | 0.72 | <b>0.05</b>   |
| MSM0027                      | glutamate synthase, AltB                                  | 2.35                         | 0.64 | <b>0.006</b>  |
| MSM0368                      | glutamate synthase (NADPH), alpha subunit, GltA           | 2.89                         | 0.60 | <b>0.008</b>  |
| MSM1418                      | glutamine synthetase, GlnA                                | 19.06                        | 5.35 | <b>0.0005</b> |
| <b>LIPID METABOLISM</b>      |                                                           |                              |      |               |
| MSM0227                      | hydroxymethylglutaryl-CoA (HMG-CoA) reductase, HmgA       | 0.78                         | 0.11 | 0.15          |

<sup>1</sup> *M. smithii* gene expression *in vivo* in the presence of *B. thetaiotaomicron* vs. alone
