# Supplementary material
Source: PubMed Central journal article supplement (PMC1965566)
Supplement: pnas_0704189104_19.pdf [file pnas_0704189104_19.pdf]

**Table 13. *M. smithii* GeneChip**

|                                        | <b>Naming Prefix</b> | <b>Genes Represented</b> | <b>Probesets</b> | <b>Probe pairs</b> | <b>Average number of probe pairs per probeset</b> |
|----------------------------------------|----------------------|--------------------------|------------------|--------------------|---------------------------------------------------|
| <b>control sequences</b>               | AFFX                 | 64                       | 64               | 1024               | 16                                                |
| <b>protein coding genes</b>            | MSM                  | 1778                     | 2018             | 19967              | 11                                                |
| <b>tRNA genes (1-2 probesets/gene)</b> | MSM-tRNAxx           | 34                       | 74               | 450                | 11                                                |
| <b>rRNA genes<sup>1</sup></b>          | MSMxx-rRNA           | 8                        | 7                | 77                 | 11                                                |
| <b>intergenic sequences</b>            | ig                   | --                       | 1581             | 4931               | 3                                                 |

<sup>1</sup>Note that the *M. smithii* genome contains three 5S rRNA genes, one 7S rRNA gene, two 16S rRNA genes, and two 23S rRNA genes. Due to the high nucleotide sequence identity among rRNA genes of a given type, each is represented by a single probeset (the 16S rRNA probeset is replicated four times on the GeneChip)
