# Supplementary material
Source: PubMed Central journal article supplement (PMC1965566)
Supplement: pnas_0704189104_20.pdf [file pnas_0704189104_20.pdf]

**Table 2. Predicted proteome of *M. smithii* strain PS and conservation among other strains and in the fecal microbiome of two healthy adults.**

|         |                                                                                      | KEY: <span style="display:inline-block; width:10px; height:10px; background-color:black;"></span> - Present <span style="display:inline-block; width:10px; height:10px; background-color:gray;"></span> - Absent <span style="display:inline-block; width:10px; height:10px; background-color:white;"></span> - Divergent |    |     |      |                                   |
|---------|--------------------------------------------------------------------------------------|---------------------------------------------------------------------------------------------------------------------------------------------------------------------------------------------------------------------------------------------------------------------------------------------------------------------------|----|-----|------|-----------------------------------|
|         |                                                                                      | <i>M. smithii</i> strain genotyping <sup>1</sup>                                                                                                                                                                                                                                                                          |    |     |      | Human Gut Microbiome <sup>2</sup> |
| Gene    | Annotation                                                                           | PS                                                                                                                                                                                                                                                                                                                        | F1 | ALI | B181 |                                   |
| MSM0001 | exoribonuclease VII, large subunit, XseA                                             |                                                                                                                                                                                                                                                                                                                           |    |     |      |                                   |
| MSM0002 | integrase-recombinase protein                                                        |                                                                                                                                                                                                                                                                                                                           |    |     |      |                                   |
| MSM0003 | conserved hypothetical membrane protein (putative heme utilization/adhesion related) |                                                                                                                                                                                                                                                                                                                           |    |     |      |                                   |
| MSM0004 | predicted lysine decarboxylase                                                       |                                                                                                                                                                                                                                                                                                                           |    |     |      |                                   |
| MSM0005 | conserved hypothetical protein                                                       |                                                                                                                                                                                                                                                                                                                           |    |     |      |                                   |
| MSM0006 | conserved hypothetical protein                                                       |                                                                                                                                                                                                                                                                                                                           |    |     |      |                                   |
| MSM0007 | SAM-dependent methyltransferase                                                      |                                                                                                                                                                                                                                                                                                                           |    |     |      |                                   |
| MSM0008 | putative transposase                                                                 |                                                                                                                                                                                                                                                                                                                           |    |     |      |                                   |
| MSM0009 | conserved hypothetical protein                                                       |                                                                                                                                                                                                                                                                                                                           |    |     |      |                                   |
| MSM0010 | N-acetyltransferase, GNAT family                                                     |                                                                                                                                                                                                                                                                                                                           |    |     |      |                                   |
| MSM0011 | hypothetical protein                                                                 |                                                                                                                                                                                                                                                                                                                           |    |     |      |                                   |
| MSM0012 | conserved hypothetical protein                                                       |                                                                                                                                                                                                                                                                                                                           |    |     |      |                                   |
| MSM0013 | hypothetical protein                                                                 |                                                                                                                                                                                                                                                                                                                           |    |     |      |                                   |
| MSM0014 | putative heat shock related protein                                                  |                                                                                                                                                                                                                                                                                                                           |    |     |      |                                   |
| MSM0015 | hypothetical protein                                                                 |                                                                                                                                                                                                                                                                                                                           |    |     |      |                                   |
| MSM0016 | hypothetical protein                                                                 |                                                                                                                                                                                                                                                                                                                           |    |     |      |                                   |
| MSM0017 | hypothetical protein                                                                 |                                                                                                                                                                                                                                                                                                                           |    |     |      |                                   |
| MSM0018 | hypothetical protein                                                                 |                                                                                                                                                                                                                                                                                                                           |    |     |      |                                   |
| MSM0019 | hypothetical protein                                                                 |                                                                                                                                                                                                                                                                                                                           |    |     |      |                                   |
| MSM0020 | predicted O-linked GlnNAc transferase                                                |                                                                                                                                                                                                                                                                                                                           |    |     |      |                                   |
| MSM0021 | short chain dehydrogenase (7-alpha-hydroxysteroid dehydrogenase)                     |                                                                                                                                                                                                                                                                                                                           |    |     |      |                                   |
| MSM0022 | hypothetical protein                                                                 |                                                                                                                                                                                                                                                                                                                           |    |     |      |                                   |
| MSM0023 | uncharacterized protein predicted to be involved in DNA repair                       |                                                                                                                                                                                                                                                                                                                           |    |     |      |                                   |
| MSM0024 | hypothetical protein                                                                 |                                                                                                                                                                                                                                                                                                                           |    |     |      |                                   |
| MSM0025 | long-chain-fatty-acid-CoA ligase                                                     |                                                                                                                                                                                                                                                                                                                           |    |     |      |                                   |
| MSM0026 | predicted transcriptional regulator                                                  |                                                                                                                                                                                                                                                                                                                           |    |     |      |                                   |
| MSM0027 | glutamate synthase, domain 2 with rubredoxin                                         |                                                                                                                                                                                                                                                                                                                           |    |     |      |                                   |
| MSM0028 | SAM-dependent methyltransferase                                                      |                                                                                                                                                                                                                                                                                                                           |    |     |      |                                   |
| MSM0029 | putative calcium-binding protein                                                     |                                                                                                                                                                                                                                                                                                                           |    |     |      |                                   |
| MSM0030 | conserved hypothetical membrane protein                                              |                                                                                                                                                                                                                                                                                                                           |    |     |      |                                   |
| MSM0031 | adhesin-like protein                                                                 |                                                                                                                                                                                                                                                                                                                           |    |     |      |                                   |
| MSM0032 | hypothetical protein                                                                 |                                                                                                                                                                                                                                                                                                                           |    |     |      |                                   |
| MSM0033 | ketopantoate reductase, ApbA                                                         |                                                                                                                                                                                                                                                                                                                           |    |     |      |                                   |
| MSM0034 | conserved hypothetical protein                                                       |                                                                                                                                                                                                                                                                                                                           |    |     |      |                                   |
| MSM0035 | hypothetical protein                                                                 |                                                                                                                                                                                                                                                                                                                           |    |     |      |                                   |
| MSM0036 | hypothetical protein                                                                 |                                                                                                                                                                                                                                                                                                                           |    |     |      |                                   |
| MSM0037 | hypothetical protein                                                                 |                                                                                                                                                                                                                                                                                                                           |    |     |      |                                   |
| MSM0038 | hypothetical protein                                                                 |                                                                                                                                                                                                                                                                                                                           |    |     |      |                                   |
| MSM0039 | hypothetical protein                                                                 |                                                                                                                                                                                                                                                                                                                           |    |     |      |                                   |
| MSM0040 | conserved hypothetical protein                                                       |                                                                                                                                                                                                                                                                                                                           |    |     |      |                                   |
| MSM0041 | hypothetical protein                                                                 |                                                                                                                                                                                                                                                                                                                           |    |     |      |                                   |
| MSM0042 | hypothetical protein                                                                 |                                                                                                                                                                                                                                                                                                                           |    |     |      |                                   |
| MSM0043 | peptide methionine sulfoxide reductase, PMSR                                         |                                                                                                                                                                                                                                                                                                                           |    |     |      |                                   |
| MSM0044 | PLP dependent aminotransferase (aspartate)                                           |                                                                                                                                                                                                                                                                                                                           |    |     |      |                                   |
| MSM0045 | nucleotide-binding protein (putative ATPase involved in chromosome partitioning)     |                                                                                                                                                                                                                                                                                                                           |    |     |      |                                   |
| MSM0046 | NADH oxidase                                                                         |                                                                                                                                                                                                                                                                                                                           |    |     |      |                                   |
| MSM0047 | Chloramphenicol O-acetyltransferase                                                  |                                                                                                                                                                                                                                                                                                                           |    |     |      |                                   |
| MSM0048 | conserved hypothetical protein                                                       |                                                                                                                                                                                                                                                                                                                           |    |     |      |                                   |
| MSM0049 | F420-dependent NADP oxidoreductase, fno                                              |                                                                                                                                                                                                                                                                                                                           |    |     |      |                                   |
| MSM0050 | predicted metal-binding protein                                                      |                                                                                                                                                                                                                                                                                                                           |    |     |      |                                   |
| MSM0051 | adhesin-like protein                                                                 |                                                                                                                                                                                                                                                                                                                           |    |     |      |                                   |
| MSM0052 | adhesin-like protein                                                                 |                                                                                                                                                                                                                                                                                                                           |    |     |      |                                   |
| MSM0053 | tRNA nucleotidyltransferase (CCA-adding enzyme)                                      |                                                                                                                                                                                                                                                                                                                           |    |     |      |                                   |
| MSM0054 | 2'-5' RNA ligase, LigT                                                               |                                                                                                                                                                                                                                                                                                                           |    |     |      |                                   |
| MSM0055 | predicted alternative 3-dehydroquinate synthase                                      |                                                                                                                                                                                                                                                                                                                           |    |     |      |                                   |
| MSM0056 | archaeal fructose-1,6-bisphosphate aldolase                                          |                                                                                                                                                                                                                                                                                                                           |    |     |      |                                   |
| MSM0057 | adhesin-like protein                                                                 |                                                                                                                                                                                                                                                                                                                           |    |     |      |                                   |
| MSM0058 | DNA helicase II                                                                      |                                                                                                                                                                                                                                                                                                                           |    |     |      |                                   |
| MSM0059 | SAM-dependent methyltransferase                                                      |                                                                                                                                                                                                                                                                                                                           |    |     |      |                                   |
| MSM0060 | predicted archaeal kinase (GHMP kinase family)                                       |                                                                                                                                                                                                                                                                                                                           |    |     |      |                                   |
| MSM0061 | predicted ATPase (AAA+ superfamily)                                                  |                                                                                                                                                                                                                                                                                                                           |    |     |      |                                   |
| MSM0062 | flavodoxin                                                                           |                                                                                                                                                                                                                                                                                                                           |    |     |      |                                   |
| MSM0063 | amidohydrolase (PHP family)                                                          |                                                                                                                                                                                                                                                                                                                           |    |     |      |                                   |
| MSM0064 | conserved hypothetical protein                                                       |                                                                                                                                                                                                                                                                                                                           |    |     |      |                                   |
| MSM0065 | riboflavin-specific deaminase                                                        |                                                                                                                                                                                                                                                                                                                           |    |     |      |                                   |
| MSM0066 | N-acetylglucosamine-1-phosphate transferase, GT4 family                              |                                                                                                                                                                                                                                                                                                                           |    |     |      |                                   |
| MSM0067 | conserved hypothetical protein                                                       |                                                                                                                                                                                                                                                                                                                           |    |     |      |                                   |

|         |                                                                                        |  |  |  |  |
|---------|----------------------------------------------------------------------------------------|--|--|--|--|
| MSM0068 | hypothetical protein                                                                   |  |  |  |  |
| MSM0069 | conserved hypothetical protein                                                         |  |  |  |  |
| MSM0070 | conserved hypothetical protein                                                         |  |  |  |  |
| MSM0071 | methionyl-tRNA synthetase, MetG                                                        |  |  |  |  |
| MSM0072 | putative exonuclease SBCC                                                              |  |  |  |  |
| MSM0073 | DNA primase, large subunit (eukaryotic-type)                                           |  |  |  |  |
| MSM0074 | hypothetical protein                                                                   |  |  |  |  |
| MSM0075 | DNA primase, small subunit                                                             |  |  |  |  |
| MSM0076 | conserved hypothetical protein                                                         |  |  |  |  |
| MSM0077 | thymidylate kinase                                                                     |  |  |  |  |
| MSM0078 | dolichol kinase (cytidyltransferase family)                                            |  |  |  |  |
| MSM0079 | CofH protein (7,8-didemethyl-8-hydroxy-5-deazariboflavin (FO)/F420 biosynthesis)       |  |  |  |  |
| MSM0080 | sulfoxyruvate decarboxylase, comD                                                      |  |  |  |  |
| MSM0081 | sulfoxyruvate decarboxylase, ComE                                                      |  |  |  |  |
| MSM0082 | heterodisulfide reductase, subunit A, HdrA                                             |  |  |  |  |
| MSM0083 | heterodisulfide reductase, subunit B, HdrB                                             |  |  |  |  |
| MSM0084 | heterodisulfide reductase, subunit C, HdrC                                             |  |  |  |  |
| MSM0085 | putative ferredoxin                                                                    |  |  |  |  |
| MSM0086 | (2R)-phospho-3-sulfolactate synthase, ComA                                             |  |  |  |  |
| MSM0087 | putative transposase                                                                   |  |  |  |  |
| MSM0088 | conserved hypothetical protein                                                         |  |  |  |  |
| MSM0089 | pyrroline-5-carboxylate reductase (NADP oxidoreductase, coenzyme F420-dependent), ProC |  |  |  |  |
| MSM0090 | conserved hypothetical protein (UPF0058)                                               |  |  |  |  |
| MSM0091 | 2,3-diphosphoglycerate synthase (putative GTPase)                                      |  |  |  |  |
| MSM0092 | putative adhesin-like protein                                                          |  |  |  |  |
| MSM0093 | conserved hypothetical membrane-spanning protein (phage infection)                     |  |  |  |  |
| MSM0094 | predicted transcription regulator (TetR family)                                        |  |  |  |  |
| MSM0095 | predicted phosphotransacetylase                                                        |  |  |  |  |
| MSM0096 | undecaprenyl pyrophosphate synthase, UppS                                              |  |  |  |  |
| MSM0097 | Mq-dependent DNase, TatD                                                               |  |  |  |  |
| MSM0098 | hypothetical protein                                                                   |  |  |  |  |
| MSM0099 | conserved hypothetical membrane protein                                                |  |  |  |  |
| MSM0100 | conserved hypothetical protein                                                         |  |  |  |  |
| MSM0101 | precorrin-3 methylase, CbiF                                                            |  |  |  |  |
| MSM0102 | cobalamin-independent methionine synthase, MetE                                        |  |  |  |  |
| MSM0103 | conserved hypothetical protein                                                         |  |  |  |  |
| MSM0104 | conserved hypothetical protein                                                         |  |  |  |  |
| MSM0105 | conserved hypothetical protein                                                         |  |  |  |  |
| MSM0106 | conserved hypothetical protein                                                         |  |  |  |  |
| MSM0107 | hydrogenase expression/formation protein, HypB                                         |  |  |  |  |
| MSM0108 | hydrogenase nickel incorporation protein, HypA                                         |  |  |  |  |
| MSM0109 | conserved hypothetical membrane-spanning protein                                       |  |  |  |  |
| MSM0110 | predicted transposase                                                                  |  |  |  |  |
| MSM0111 | hypothetical protein                                                                   |  |  |  |  |
| MSM0112 | ATP-dependent RNA helicase, eIF-4A family                                              |  |  |  |  |
| MSM0113 | DNA helicase                                                                           |  |  |  |  |
| MSM0114 | hypothetical protein                                                                   |  |  |  |  |
| MSM0115 | conserved hypothetical protein                                                         |  |  |  |  |
| MSM0116 | MobA-related protein                                                                   |  |  |  |  |
| MSM0117 | conserved hypothetical membrane protein                                                |  |  |  |  |
| MSM0118 | cell wall biosynthesis protein, MurD-like peptide ligase family                        |  |  |  |  |
| MSM0119 | predicted nuclease                                                                     |  |  |  |  |
| MSM0120 | purine NTPase involved in DNA repair, Rad50                                            |  |  |  |  |
| MSM0121 | DNA repair exonuclease (SbcD/Mre11-family), Rad32                                      |  |  |  |  |
| MSM0122 | predicted ATPase                                                                       |  |  |  |  |
| MSM0123 | uncharacterized protein conserved in archaea                                           |  |  |  |  |
| MSM0124 | predicted phosphate-binding protein (PcrB family)                                      |  |  |  |  |
| MSM0125 | ribosomal protein L40e                                                                 |  |  |  |  |
| MSM0126 | conserved hypothetical protein                                                         |  |  |  |  |
| MSM0127 | hypothetical protein                                                                   |  |  |  |  |
| MSM0128 | conserved hypothetical protein                                                         |  |  |  |  |
| MSM0129 | nicotinamide mononucleotide adenylyltransferase, NadR                                  |  |  |  |  |
| MSM0130 | molybdenum cofactor biosynthesis protein, MoaE                                         |  |  |  |  |
| MSM0131 | molybdenum-binding protein, MopI                                                       |  |  |  |  |
| MSM0132 | conserved hypothetical protein                                                         |  |  |  |  |
| MSM0133 | predicted thioesterase, FcbC                                                           |  |  |  |  |
| MSM0134 | M42 glutamyl aminopeptidase/endo-glucanase                                             |  |  |  |  |
| MSM0135 | coenzyme F420-reducing hydrogenase, beta subunit                                       |  |  |  |  |
| MSM0136 | putative ferredoxin                                                                    |  |  |  |  |
| MSM0137 | putative archaeal flagellar protein D/E                                                |  |  |  |  |
| MSM0138 | predicted exonuclease                                                                  |  |  |  |  |
| MSM0139 | hypothetical protein                                                                   |  |  |  |  |
| MSM0140 | conserved hypothetical protein                                                         |  |  |  |  |
| MSM0141 | dephospho-CoA kinase, CoaE                                                             |  |  |  |  |

|         |                                                                                          |  |  |  |  |
|---------|------------------------------------------------------------------------------------------|--|--|--|--|
| MSM0142 | predicted ATPase (PP-loop superfamily)                                                   |  |  |  |  |
| MSM0143 | conserved hypothetical membrane protein                                                  |  |  |  |  |
| MSM0144 | hypothetical protein (putative ADP-ribosylation domain)                                  |  |  |  |  |
| MSM0145 | conserved hypothetical protein                                                           |  |  |  |  |
| MSM0146 | type IV leader peptidase                                                                 |  |  |  |  |
| MSM0147 | CTP synthase (UTP-ammonia lyase), PyrG                                                   |  |  |  |  |
| MSM0148 | predicted oxidoreductase, aldo/keto reductase family                                     |  |  |  |  |
| MSM0149 | predicted acetyltransferase                                                              |  |  |  |  |
| MSM0150 | hypothetical protein                                                                     |  |  |  |  |
| MSM0151 | hypothetical protein                                                                     |  |  |  |  |
| MSM0152 | Na <sup>+</sup> -driven multidrug efflux pump (MATE family), NorM                        |  |  |  |  |
| MSM0153 | predicted phosphoglycerate mutase                                                        |  |  |  |  |
| MSM0154 | homoserine dehydrogenase, ThrA                                                           |  |  |  |  |
| MSM0155 | predicted allosteric regulator of homoserine dehydrogenase                               |  |  |  |  |
| MSM0156 | Asp-tRNA(Asn)/Glu-tRNA(Gln) amidotransferase, C subunit                                  |  |  |  |  |
| MSM0157 | predicted type I restriction-modification enzyme, subunit S                              |  |  |  |  |
| MSM0158 | type I restriction-modification system methylase, subunit S                              |  |  |  |  |
| MSM0159 | adhesin-like protein                                                                     |  |  |  |  |
| MSM0160 | asparagine synthetase, AsnB                                                              |  |  |  |  |
| MSM0161 | hypothetical protein                                                                     |  |  |  |  |
| MSM0162 | hypothetical protein                                                                     |  |  |  |  |
| MSM0163 | conserved hypothetical protein predicted to be involved in DNA repair                    |  |  |  |  |
| MSM0164 | conserved hypothetical protein predicted to be involved in DNA repair                    |  |  |  |  |
| MSM0165 | predicted exonuclease                                                                    |  |  |  |  |
| MSM0166 | predicted helicase                                                                       |  |  |  |  |
| MSM0167 | conserved hypothetical protein predicted to be involved in DNA repair (RAMP superfamily) |  |  |  |  |
| MSM0168 | conserved hypothetical protein predicted to be involved in DNA repair                    |  |  |  |  |
| MSM0169 | predicted CRISPR-associated protein                                                      |  |  |  |  |
| MSM0170 | conserved hypothetical protein predicted to be involved in DNA repair (RAMP superfamily) |  |  |  |  |
| MSM0171 | conserved hypothetical membrane protein (invasin/intimin cell-adhesion domain)           |  |  |  |  |
| MSM0172 | hypothetical protein                                                                     |  |  |  |  |
| MSM0173 | adhesin-like protein                                                                     |  |  |  |  |
| MSM0174 | O-acetylhomoserine sulfhydrylase (PLP-dependent), MET17                                  |  |  |  |  |
| MSM0175 | homoserine O-acetyltransferase, MetX                                                     |  |  |  |  |
| MSM0176 | ribonuclease III (dsRNA-specific), Rnc                                                   |  |  |  |  |
| MSM0177 | hypothetical protein                                                                     |  |  |  |  |
| MSM0178 | conserved hypothetical protein                                                           |  |  |  |  |
| MSM0179 | hypothetical protein                                                                     |  |  |  |  |
| MSM0180 | hypothetical protein                                                                     |  |  |  |  |
| MSM0181 | ribosomal protein L37e                                                                   |  |  |  |  |
| MSM0182 | snRNP Sm-like protein                                                                    |  |  |  |  |
| MSM0183 | RNA-binding protein, PUA domain family                                                   |  |  |  |  |
| MSM0184 | creatinine amidohydrolase                                                                |  |  |  |  |
| MSM0185 | conserved hypothetical membrane protein                                                  |  |  |  |  |
| MSM0186 | conserved hypothetical protein                                                           |  |  |  |  |
| MSM0187 | rubredoxin                                                                               |  |  |  |  |
| MSM0188 | rubredoxin                                                                               |  |  |  |  |
| MSM0189 | acetyl/acyl transferase related protein                                                  |  |  |  |  |
| MSM0190 | predicted ATPase                                                                         |  |  |  |  |
| MSM0191 | conserved hypothetical protein                                                           |  |  |  |  |
| MSM0192 | argininosuccinate lyase, ArgH                                                            |  |  |  |  |
| MSM0193 | ribosomal protein S27ae                                                                  |  |  |  |  |
| MSM0194 | ribosomal protein S24ae                                                                  |  |  |  |  |
| MSM0195 | uncharacterized protein conserved in archaea                                             |  |  |  |  |
| MSM0196 | archaeal DNA-dependent RNA polymerase, subunit E, RpoE                                   |  |  |  |  |
| MSM0197 | archaeal DNA-dependent RNA polymerase, subunit E, RpoE                                   |  |  |  |  |
| MSM0198 | inorganic pyrophosphatase                                                                |  |  |  |  |
| MSM0199 | conserved hypothetical protein (Pit N-term./Vapc superfamily)                            |  |  |  |  |
| MSM0200 | translation initiation factor aIF-2, gamma subunit                                       |  |  |  |  |
| MSM0201 | ribosomal protein S6e                                                                    |  |  |  |  |
| MSM0202 | translation initiation factor aIF-2, InfB                                                |  |  |  |  |
| MSM0203 | nucleoside diphosphate kinase, Ndk                                                       |  |  |  |  |
| MSM0204 | ribosomal protein L24e                                                                   |  |  |  |  |
| MSM0205 | ribosomal protein S28e                                                                   |  |  |  |  |
| MSM0206 | ribosomal protein L7ae                                                                   |  |  |  |  |
| MSM0207 | predicted DNA-binding protein                                                            |  |  |  |  |
| MSM0208 | predicted DNA-binding protein                                                            |  |  |  |  |
| MSM0209 | ferredoxin                                                                               |  |  |  |  |
| MSM0210 | hypothetical protein                                                                     |  |  |  |  |
| MSM0211 | hypothetical protein                                                                     |  |  |  |  |
| MSM0212 | conserved hypothetical protein                                                           |  |  |  |  |
| MSM0213 | archaeal histone, HMTA                                                                   |  |  |  |  |
| MSM0214 | threonine synthase (pyridoxal-phosphate dependent), ThrC                                 |  |  |  |  |

|         |                                                                               |  |    |  |  |
|---------|-------------------------------------------------------------------------------|--|----|--|--|
| MSM0215 | conserved hypothetical integral membrane protein                              |  |    |  |  |
| MSM0216 | tryptophanyl-tRNA synthetase, TrpS                                            |  |    |  |  |
| MSM0217 | tRNA intron endonuclease, EndA                                                |  |    |  |  |
| MSM0218 | iron dependent transcriptional regulator (Fe2+-binding)                       |  |    |  |  |
| MSM0219 | putative cysteine protease (transglutaminase-like superfamily)                |  |    |  |  |
| MSM0220 | chaperonin (TCP-1/cpn60 family), alpha subunit                                |  |    |  |  |
| MSM0221 | adhesin-like protein                                                          |  |    |  |  |
| MSM0222 | flavoprotein (Metallo-beta-lactamase superfamily), FpaA                       |  |    |  |  |
| MSM0223 | conserved hypothetical protein                                                |  |    |  |  |
| MSM0224 | conserved hypothetical protein                                                |  |    |  |  |
| MSM0225 | conserved hypothetical protein                                                |  |    |  |  |
| MSM0226 | hypothetical protein                                                          |  |    |  |  |
| MSM0227 | hydroxymethylglutaryl-CoA (HMG-CoA) reductase, HmgA                           |  |    |  |  |
| MSM0228 | succinyl-CoA synthetase, alpha subunit, SucD                                  |  |    |  |  |
| MSM0229 | conserved hypothetical protein                                                |  |    |  |  |
| MSM0230 | putative transposase                                                          |  | ND |  |  |
| MSM0231 | 3-dehydroquinate dehydratase                                                  |  |    |  |  |
| MSM0232 | signal peptidase I                                                            |  |    |  |  |
| MSM0233 | nitrogen regulatory protein P-II, GlnK                                        |  |    |  |  |
| MSM0234 | ammonium transporter                                                          |  |    |  |  |
| MSM0235 | hypothetical protein                                                          |  |    |  |  |
| MSM0236 | phosphohydrolase (HD superfamily)                                             |  |    |  |  |
| MSM0237 | 3-polyprenyl-4-hydroxybenzoate decarboxylase, UbiX                            |  |    |  |  |
| MSM0238 | precorrin-6B methylase, CbiT                                                  |  |    |  |  |
| MSM0239 | conserved hypothetical protein                                                |  |    |  |  |
| MSM0240 | molybdopterin-guanine dinucleotide biosynthesis protein A, MobA               |  |    |  |  |
| MSM0241 | ribonuclease PH-related protein                                               |  |    |  |  |
| MSM0242 | ribonuclease PH, Rph                                                          |  |    |  |  |
| MSM0243 | RNA-binding protein Rrp4                                                      |  |    |  |  |
| MSM0244 | predicted exosome subunit                                                     |  |    |  |  |
| MSM0245 | proteasome, alpha subunit, PsmA                                               |  |    |  |  |
| MSM0246 | ribonuclease P, subunit Rpp14                                                 |  |    |  |  |
| MSM0247 | ribonuclease P, subunit p30                                                   |  |    |  |  |
| MSM0248 | hypothetical protein                                                          |  |    |  |  |
| MSM0249 | conserved hypothetical protein                                                |  |    |  |  |
| MSM0250 | conserved hypothetical membrane protein (putative zinc-finger domain, Znf265) |  |    |  |  |
| MSM0251 | hypothetical protein                                                          |  |    |  |  |
| MSM0252 | Na+-driven multidrug efflux pump, NorM                                        |  |    |  |  |
| MSM0253 | conserved hypothetical protein                                                |  |    |  |  |
| MSM0254 | hypothetical protein                                                          |  |    |  |  |
| MSM0255 | putative transcription regulator (winged helix DNA-binding domain)            |  |    |  |  |
| MSM0256 | putative transposase                                                          |  |    |  |  |
| MSM0257 | conserved hypothetical membrane protein                                       |  |    |  |  |
| MSM0258 | hypothetical protein (putative zinc-finger domain, Znf265)                    |  |    |  |  |
| MSM0259 | hypothetical protein (putative zinc beta-ribbon superfamily)                  |  |    |  |  |
| MSM0260 | archaea-specific RecJ-like exonuclease                                        |  |    |  |  |
| MSM0261 | conserved hypothetical protein                                                |  |    |  |  |
| MSM0262 | desulfoferrodoxin (dfx)                                                       |  |    |  |  |
| MSM0263 | nitrogen fixation protein, NifU                                               |  |    |  |  |
| MSM0264 | cysteine desulfurase, NifS                                                    |  |    |  |  |
| MSM0265 | O-acetylhomoserine sulfhydrylase                                              |  |    |  |  |
| MSM0266 | adhesin-like protein                                                          |  |    |  |  |
| MSM0267 | NAD(P)H-dependent FMN reductase (multimeric flavodoxin)                       |  |    |  |  |
| MSM0268 | cysteinyl-tRNA synthetase, CysS                                               |  |    |  |  |
| MSM0269 | predicted transcriptional regulator (lambda repressor-like)                   |  |    |  |  |
| MSM0270 | serine acetyltransferase, CysE                                                |  |    |  |  |
| MSM0271 | cysteine synthase, CysK                                                       |  |    |  |  |
| MSM0272 | endonuclease III                                                              |  |    |  |  |
| MSM0273 | EPSP synthase (3-phosphoshikimate 1-carboxyvinyltransferase)                  |  |    |  |  |
| MSM0274 | SAM-dependent methyltransferase (cyclopropane fatty acid synthase-related)    |  |    |  |  |
| MSM0275 | valyl-tRNA synthetase, ValS                                                   |  |    |  |  |
| MSM0276 | conserved hypothetical protein                                                |  |    |  |  |
| MSM0277 | phenylalanyl-tRNA synthetase, beta subunit, PheT                              |  |    |  |  |
| MSM0278 | hypothetical protein                                                          |  |    |  |  |
| MSM0279 | conserved hypothetical protein (UPF0047 family)                               |  |    |  |  |
| MSM0280 | predicted archaeal ATPase (AAA+ superfamily)                                  |  |    |  |  |
| MSM0281 | putative adhesin-like protein                                                 |  |    |  |  |
| MSM0282 | adhesin-like protein                                                          |  |    |  |  |
| MSM0283 | hypothetical protein                                                          |  |    |  |  |
| MSM0284 | ribose 5-phosphate isomerase, RpiA                                            |  |    |  |  |
| MSM0285 | conserved hypothetical protein (UPF0179 family)                               |  |    |  |  |
| MSM0286 | glycerol 1-phosphate dehydrogenase (Dehydroquinate synthase-like family)      |  |    |  |  |
| MSM0287 | prolyl-tRNA synthetase, ProS                                                  |  |    |  |  |

|         |                                                                                                                  |  |  |    |  |
|---------|------------------------------------------------------------------------------------------------------------------|--|--|----|--|
| MSM0288 | conserved hypothetical protein (DUF121 daomain)                                                                  |  |  |    |  |
| MSM0289 | phosphomethylpyrimidine kinase (HMPP-kinase), ThiD                                                               |  |  |    |  |
| MSM0290 | nitrate/sulfonate/bicarbonate ABC transporter, ATPase component, TauB                                            |  |  |    |  |
| MSM0291 | nitrate/sulfonate/bicarbonate ABC transporter, permease component, TauC                                          |  |  |    |  |
| MSM0292 | predicted metal-dependent membrane protease                                                                      |  |  |    |  |
| MSM0293 | cation transport ATPase, HAD family                                                                              |  |  |    |  |
| MSM0294 | conserved hypothetical protein                                                                                   |  |  |    |  |
| MSM0295 | formate dehydrogenase accessory protein, FdhD                                                                    |  |  |    |  |
| MSM0296 | putative carboxymuconolactone decarboxylase                                                                      |  |  |    |  |
| MSM0297 | predicted exosome subunit                                                                                        |  |  |    |  |
| MSM0298 | ribosomal protein L15e                                                                                           |  |  |    |  |
| MSM0299 | conserved hypothetical protein                                                                                   |  |  |    |  |
| MSM0300 | peptide/nickel ABC transporter, solute-binding component                                                         |  |  |    |  |
| MSM0301 | peptide/nickel ABC transporter, permease component, DppB                                                         |  |  |    |  |
| MSM0302 | peptide/nickel ABC transporter, permease component, DppC                                                         |  |  |    |  |
| MSM0303 | peptide/nickel ABC transporter, ATP-binding component, DppD                                                      |  |  |    |  |
| MSM0304 | peptide/nickel ABC transporter, ATP-binding component, DppF                                                      |  |  |    |  |
| MSM0305 | conserved hypothetical membrane protein (IMP dehydrogenase related)                                              |  |  |    |  |
| MSM0306 | polyferredoxin, iron-sulfur binding                                                                              |  |  |    |  |
| MSM0307 | sugar kinase (ribokinase/pfkB superfamily)                                                                       |  |  |    |  |
| MSM0308 | formylmethanofuran:tetrahydromethanopterin formyltransferase, FtrC                                               |  |  |    |  |
| MSM0309 | conserved hypothetical membrane protein                                                                          |  |  |    |  |
| MSM0310 | polyferredoxin, iron-sulfur binding                                                                              |  |  |    |  |
| MSM0311 | polyferredoxin, iron-sulfur binding                                                                              |  |  |    |  |
| MSM0312 | [NiFe]-hydrogenase-3-type complex, large subunit/NADH:quinone oxidoreductase (complex I), subunit 49K/NdhH/NuoD  |  |  |    |  |
| MSM0313 | [NiFe]-hydrogenase-3-type complex, small subunit/NADH:quinone oxidoreductase (complex I), subunit PSST/NdhK/NuoB |  |  |    |  |
| MSM0314 | conserved hypothetical protein                                                                                   |  |  |    |  |
| MSM0315 | predicted [NiFe]-hydrogenase-3-type complex Eha, membrane protein EhaL                                           |  |  |    |  |
| MSM0316 | hypothetical protein                                                                                             |  |  |    |  |
| MSM0317 | NADH dehydrogenase (ubiquinone), subunit 1                                                                       |  |  |    |  |
| MSM0318 | conserved hypothetical membrane protein                                                                          |  |  |    |  |
| MSM0319 | NADH dehydrogenase I, subunit N related                                                                          |  |  |    |  |
| MSM0320 | predicted [NiFe]-hydrogenase-3-type complex Eha, membrane protein EhaG                                           |  |  |    |  |
| MSM0321 | conserved hypothetical membrane protein                                                                          |  |  |    |  |
| MSM0322 | predicted [NiFe]-hydrogenase-3-type complex Eha, membrane protein EhaE                                           |  |  |    |  |
| MSM0323 | conserved hypothetical membrane protein                                                                          |  |  |    |  |
| MSM0324 | conserved hypothetical membrane protein                                                                          |  |  |    |  |
| MSM0325 | conserved hypothetical membrane protein                                                                          |  |  |    |  |
| MSM0326 | conserved hypothetical membrane protein                                                                          |  |  |    |  |
| MSM0327 | UDP-glucose 4-epimerase (NAD dependent)                                                                          |  |  |    |  |
| MSM0328 | conserved hypothetical protein                                                                                   |  |  |    |  |
| MSM0329 | DNA binding protein (regulator), xenobiotic response element family                                              |  |  |    |  |
| MSM0330 | acetyl-CoA synthetase, AMP-forming-related, Acs                                                                  |  |  |    |  |
| MSM0331 | 2-oxoisovalerate ferredoxin oxidoreductase, delta subunit                                                        |  |  |    |  |
| MSM0332 | 2-oxoisovalerate ferredoxin oxidoreductase, alpha subunit                                                        |  |  |    |  |
| MSM0333 | 2-oxoisovalerate ferredoxin oxidoreductase, beta subunit                                                         |  |  |    |  |
| MSM0334 | L-asparaginase, GatD,                                                                                            |  |  |    |  |
| MSM0335 | archaeal glutamyl-tRNA(Gln) amidotransferase, subunit E, GatE                                                    |  |  |    |  |
| MSM0336 | hypothetical protein                                                                                             |  |  |    |  |
| MSM0337 | putative adhesin-like protein                                                                                    |  |  |    |  |
| MSM0338 | hypothetical protein                                                                                             |  |  |    |  |
| MSM0339 | hypothetical protein                                                                                             |  |  |    |  |
| MSM0340 | thioredoxin reductase (NADPH), TrxB                                                                              |  |  |    |  |
| MSM0341 | hypothetical protein                                                                                             |  |  |    |  |
| MSM0342 | putative transposase                                                                                             |  |  | ND |  |
| MSM0343 | GMP synthase (glutamine-hydrolysing), subunit A, GuaA                                                            |  |  |    |  |
| MSM0344 | hypothetical protein                                                                                             |  |  |    |  |
| MSM0345 | GMP synthase (glutamine-hydrolysing), PP-ATPase domain/subunit, GuaA                                             |  |  |    |  |
| MSM0346 | conserved hypothetical protein                                                                                   |  |  |    |  |
| MSM0347 | putative pyridoxal phosphate-dependent enzyme                                                                    |  |  |    |  |
| MSM0348 | conserved hypothetical protein                                                                                   |  |  |    |  |
| MSM0349 | hypothetical protein                                                                                             |  |  |    |  |
| MSM0350 | 2-isopropylmalate synthase, LeuA                                                                                 |  |  |    |  |
| MSM0351 | conserved hypothetical protein                                                                                   |  |  |    |  |
| MSM0352 | predicted DNA modification methylase                                                                             |  |  |    |  |
| MSM0353 | conserved hypothetical protein                                                                                   |  |  |    |  |

|         |                                                                                                                           |  |  |  |  |
|---------|---------------------------------------------------------------------------------------------------------------------------|--|--|--|--|
| MSM0354 | ATP-dependent 26S proteasome regulatory subunit, RPT1                                                                     |  |  |  |  |
| MSM0355 | predicted transcription factor (eukaryotic MBF1 related)                                                                  |  |  |  |  |
| MSM0356 | conserved hypothetical protein                                                                                            |  |  |  |  |
| MSM0357 | conserved hypothetical membrane protein (possible Zinc-binding)                                                           |  |  |  |  |
| MSM0358 | conserved hypothetical membrane protein                                                                                   |  |  |  |  |
| MSM0359 | cell wall biosynthesis protein, MurD-like peptide ligase family                                                           |  |  |  |  |
| MSM0360 | cell wall biosynthesis protein, phospho-N-acetylmuramoyl-pentapeptide transferase family                                  |  |  |  |  |
| MSM0361 | carbamoyl-phosphate synthase, large subunit, CarB                                                                         |  |  |  |  |
| MSM0362 | coenzyme F420-reducing hydrogenase (Ni,Fe-hydrogenase maturation protease), delta subunit                                 |  |  |  |  |
| MSM0363 | predicted RNA methylase                                                                                                   |  |  |  |  |
| MSM0364 | transcriptional regulator (nickel-responsive), NikR                                                                       |  |  |  |  |
| MSM0365 | conserved hypothetical protein                                                                                            |  |  |  |  |
| MSM0366 | hypothetical protein                                                                                                      |  |  |  |  |
| MSM0367 | conserved hypothetical protein                                                                                            |  |  |  |  |
| MSM0368 | glutamate synthase (NADPH), subunit 2                                                                                     |  |  |  |  |
| MSM0369 | glutamate synthase, subunit 3                                                                                             |  |  |  |  |
| MSM0370 | glutamate synthase, subunit 1                                                                                             |  |  |  |  |
| MSM0371 | predicted glutamine amidotransferase involved in pyridoxine biosynthesis, Pdx2                                            |  |  |  |  |
| MSM0372 | phycobiliprotein (PBS) lyase (HEAT repeat)                                                                                |  |  |  |  |
| MSM0373 | isocitrate/isopropylmalate dehydrogenase, LeuB                                                                            |  |  |  |  |
| MSM0374 | long-chain fatty-acid-CoA ligase (AMP-forming), CaiC                                                                      |  |  |  |  |
| MSM0375 | acetylglutamate kinase, ArgB                                                                                              |  |  |  |  |
| MSM0376 | alcohol dehydrogenase (zinc-binding), GroES-like                                                                          |  |  |  |  |
| MSM0377 | 4-diphosphocytidyl-2-methyl-D-erythritol synthase, IspD                                                                   |  |  |  |  |
| MSM0378 | SAM-dependent methyltransferase                                                                                           |  |  |  |  |
| MSM0379 | glutamate N-acetyltransferase, ArgJ                                                                                       |  |  |  |  |
| MSM0380 | hypothetical protein                                                                                                      |  |  |  |  |
| MSM0381 | conserved hypothetical protein                                                                                            |  |  |  |  |
| MSM0382 | conserved hypothetical protein (PIN domain-like)                                                                          |  |  |  |  |
| MSM0383 | predicted phosphohydrolase, calcineurin-like superfamily                                                                  |  |  |  |  |
| MSM0384 | transcription factor, NACalpha-BTF3 related                                                                               |  |  |  |  |
| MSM0385 | anaerobic magnesium-protoporphyrin IX monomethyl ester cyclase, Elongator protein 3/MiaB/NifB family                      |  |  |  |  |
| MSM0386 | sodium/proline symporter (proline permease), PutP                                                                         |  |  |  |  |
| MSM0387 | coenzyme F390 synthetase, PaaK                                                                                            |  |  |  |  |
| MSM0388 | amino acid regulator                                                                                                      |  |  |  |  |
| MSM0389 | hypothetical protein                                                                                                      |  |  |  |  |
| MSM0390 | hypothetical protein                                                                                                      |  |  |  |  |
| MSM0391 | indolepyruvate ferredoxin oxidoreductase, beta subunit                                                                    |  |  |  |  |
| MSM0392 | indolepyruvate ferredoxin oxidoreductase, alpha subunit                                                                   |  |  |  |  |
| MSM0393 | fumarate reductase, iron-sulfur protein                                                                                   |  |  |  |  |
| MSM0394 | rRNA methylase, SpoU family                                                                                               |  |  |  |  |
| MSM0395 | ferredoxin, iron-sulfur binding                                                                                           |  |  |  |  |
| MSM0396 | putative transposase                                                                                                      |  |  |  |  |
| MSM0397 | xanthine/uracil permease, UraA                                                                                            |  |  |  |  |
| MSM0398 | uracil phosphoribosyltransferase, Upp                                                                                     |  |  |  |  |
| MSM0399 | hypothetical protein                                                                                                      |  |  |  |  |
| MSM0400 | hypothetical protein                                                                                                      |  |  |  |  |
| MSM0401 | predicted surface protease                                                                                                |  |  |  |  |
| MSM0402 | dCTP deaminase, dUTPase family                                                                                            |  |  |  |  |
| MSM0403 | glycyl-tRNA synthetase                                                                                                    |  |  |  |  |
| MSM0404 | predicted transcriptional regulator                                                                                       |  |  |  |  |
| MSM0405 | predicted metal-dependent DNase, TatD-related family                                                                      |  |  |  |  |
| MSM0406 | conserved hypothetical protein                                                                                            |  |  |  |  |
| MSM0407 | P-loop containing nucleoside triphosphate hydrolase (NAD(P)-binding)                                                      |  |  |  |  |
| MSM0408 | 2-phosphoglycerate kinase/small-molecule binding protein                                                                  |  |  |  |  |
| MSM0409 | C4-type Zinc-finger protein                                                                                               |  |  |  |  |
| MSM0410 | conserved hypothetical protein, histone-fold superfamily                                                                  |  |  |  |  |
| MSM0411 | adhesin-like protein                                                                                                      |  |  |  |  |
| MSM0412 | putative adhesin-like protein                                                                                             |  |  |  |  |
| MSM0413 | transcriptional regulator, MarR family                                                                                    |  |  |  |  |
| MSM0414 | Na <sup>+</sup> -driven multidrug efflux pump, NorM                                                                       |  |  |  |  |
| MSM0415 | uridylyl transferase, PyrH                                                                                                |  |  |  |  |
| MSM0416 | Mg-dependent DNase, TatD-related                                                                                          |  |  |  |  |
| MSM0417 | predicted transmembrane protein with a zinc ribbon                                                                        |  |  |  |  |
| MSM0418 | conserved hypothetical protein                                                                                            |  |  |  |  |
| MSM0419 | conserved hypothetical protein                                                                                            |  |  |  |  |
| MSM0420 | predicted permease                                                                                                        |  |  |  |  |
| MSM0421 | hypothetical protein                                                                                                      |  |  |  |  |
| MSM0422 | conserved hypothetical membrane protein                                                                                   |  |  |  |  |
| MSM0423 | glycosyltransferase (modular protein with two domains distantly related to glycosyltransferases), GT2/GT1 families [CAZy] |  |  |  |  |

|         |                                                                                                             |  |    |  |  |
|---------|-------------------------------------------------------------------------------------------------------------|--|----|--|--|
| MSM0424 | transcription initiation factor TFIIIB (zinc-binding)                                                       |  |    |  |  |
| MSM0425 | predicted RNA-binding protein involved in rRNA processing                                                   |  |    |  |  |
| MSM0426 | demethylmenaquinone methyltransferase                                                                       |  |    |  |  |
| MSM0427 | DNA primase (bacterial type), DnaG                                                                          |  |    |  |  |
| MSM0428 | integrase-recombinase protein, phage integrase family                                                       |  |    |  |  |
| MSM0429 | biotin biosynthesis protein, BioY                                                                           |  |    |  |  |
| MSM0430 | conserved hypothetical protein, predicted metal-binding                                                     |  |    |  |  |
| MSM0431 | predicted ATP-dependent carboxylase, biotin carboxylase-related                                             |  |    |  |  |
| MSM0432 | conserved hypothetical protein                                                                              |  |    |  |  |
| MSM0433 | archaeal/vacuolar-type H <sup>+</sup> -transporting ATP synthase, subunit D                                 |  |    |  |  |
| MSM0434 | archaeal/vacuolar-type H <sup>+</sup> -transporting ATP synthase, subunit B                                 |  |    |  |  |
| MSM0435 | archaeal/vacuolar-type H <sup>+</sup> -transporting ATP synthase, subunit A                                 |  |    |  |  |
| MSM0436 | archaeal/vacuolar-type H <sup>+</sup> -transporting ATP synthase, subunit F                                 |  |    |  |  |
| MSM0437 | archaeal/vacuolar-type H <sup>+</sup> -transporting ATP synthase, subunit C                                 |  |    |  |  |
| MSM0438 | archaeal/vacuolar-type H <sup>+</sup> -transporting ATP synthase, subunit E                                 |  |    |  |  |
| MSM0439 | archaeal/vacuolar-type H <sup>+</sup> -transporting ATP synthase, subunit K                                 |  |    |  |  |
| MSM0440 | archaeal/vacuolar-type H <sup>+</sup> -transporting ATP synthase, subunit I                                 |  |    |  |  |
| MSM0441 | archaeal/vacuolar-type H <sup>+</sup> -transporting ATP synthase, subunit H                                 |  |    |  |  |
| MSM0442 | hypothetical protein                                                                                        |  |    |  |  |
| MSM0443 | hypothetical protein                                                                                        |  |    |  |  |
| MSM0444 | hypothetical protein                                                                                        |  |    |  |  |
| MSM0445 | NADH dehydrogenase/NAD(P)H nitroreductase                                                                   |  |    |  |  |
| MSM0446 | citrate synthase, GltA                                                                                      |  |    |  |  |
| MSM0447 | fumarate hydratase, alpha subunit                                                                           |  |    |  |  |
| MSM0448 | conserved hypothetical protein                                                                              |  |    |  |  |
| MSM0449 | 2-methylcitrate dehydratase, MmgE/PrpD family                                                               |  |    |  |  |
| MSM0450 | conserved hypothetical membrane protein                                                                     |  |    |  |  |
| MSM0451 | conserved hypothetical membrane protein                                                                     |  |    |  |  |
| MSM0452 | predicted DNA-binding protein                                                                               |  |    |  |  |
| MSM0453 | predicted transcriptional regulator                                                                         |  |    |  |  |
| MSM0454 | hypothetical protein                                                                                        |  |    |  |  |
| MSM0455 | conserved hypothetical protein                                                                              |  |    |  |  |
| MSM0456 | conserved hypothetical protein                                                                              |  |    |  |  |
| MSM0457 | D-3-phosphoglycerate dehydrogenase, SerA                                                                    |  |    |  |  |
| MSM0458 | transposase, homeodomain-like superfamily                                                                   |  | ND |  |  |
| MSM0459 | hypothetical protein                                                                                        |  |    |  |  |
| MSM0460 | predicted transposase                                                                                       |  |    |  |  |
| MSM0461 | adhesin-like protein                                                                                        |  |    |  |  |
| MSM0462 | predicted metal-dependent protease, PAD1/JAB1 superfamily                                                   |  |    |  |  |
| MSM0463 | predicted tRNA(His) guanylyltransferase                                                                     |  |    |  |  |
| MSM0464 | homoserine/aspartate dehydrogenase (NAD binding), glyceraldehyde-3-phosphate dehydrogenase-like superfamily |  |    |  |  |
| MSM0465 | conserved hypothetical protein                                                                              |  |    |  |  |
| MSM0466 | predicted tRNA-binding protein                                                                              |  |    |  |  |
| MSM0467 | NADP-dependent glyceraldehyde-3-phosphate dehydrogenase                                                     |  |    |  |  |
| MSM0468 | conserved hypothetical membrane protein                                                                     |  |    |  |  |
| MSM0469 | conserved hypothetical membrane protein                                                                     |  |    |  |  |
| MSM0470 | conserved hypothetical membrane protein                                                                     |  |    |  |  |
| MSM0471 | type II secretion system protein F, GspF                                                                    |  |    |  |  |
| MSM0472 | Xaa-Pro aminopeptidase                                                                                      |  |    |  |  |
| MSM0473 | hypothetical protein                                                                                        |  |    |  |  |
| MSM0474 | hypothetical protein                                                                                        |  |    |  |  |
| MSM0475 | hypothetical protein                                                                                        |  |    |  |  |
| MSM0476 | hypothetical protein                                                                                        |  |    |  |  |
| MSM0477 | hypothetical protein                                                                                        |  |    |  |  |
| MSM0478 | hypothetical protein                                                                                        |  |    |  |  |
| MSM0479 | Zn-dependent protease, peptidase M50 family                                                                 |  |    |  |  |
| MSM0480 | YcaO-like protein                                                                                           |  |    |  |  |
| MSM0481 | TfuA-like protein                                                                                           |  |    |  |  |
| MSM0482 | ATP-utilizing enzymes, PP-loop superfamily                                                                  |  |    |  |  |
| MSM0483 | conserved hypothetical protein                                                                              |  |    |  |  |
| MSM0484 | inosine-5'-monophosphate dehydrogenase related protein                                                      |  |    |  |  |
| MSM0485 | universal stress protein, UspA                                                                              |  |    |  |  |
| MSM0486 | N-ethylammelane chlorohydrolase, metallo-dependent amidohydrolase family                                    |  |    |  |  |
| MSM0487 | hypothetical protein                                                                                        |  |    |  |  |
| MSM0488 | carbamoylphosphate synthase, large subunit, CarB                                                            |  |    |  |  |
| MSM0489 | carbamoylphosphate synthase, small subunit, CarA                                                            |  |    |  |  |
| MSM0490 | SAM-dependent methyltransferase, UbiE/CobQ family                                                           |  |    |  |  |
| MSM0491 | nicotinate-nucleotide pyrophosphorylase (carboxylating), NadC                                               |  |    |  |  |
| MSM0492 | ribonuclease Z (zinc-dependent), beta-lactamase superfamily, ElaC                                           |  |    |  |  |
| MSM0493 | mechanosensitive ion channel protein, Sm-like ribonucleoprotein superfamily, MscS                           |  |    |  |  |
| MSM0494 | quinolinate synthetase, subunit A, NadA                                                                     |  |    |  |  |
| MSM0495 | conserved hypothetical protein                                                                              |  |    |  |  |
| MSM0496 | homoserine O-acetyltransferase                                                                              |  |    |  |  |

|         |                                                                                 |  |  |  |  |
|---------|---------------------------------------------------------------------------------|--|--|--|--|
| MSM0497 | predicted nuclease, RecB family                                                 |  |  |  |  |
| MSM0498 | hypothetical protein                                                            |  |  |  |  |
| MSM0499 | conserved hypothetical protein                                                  |  |  |  |  |
| MSM0500 | N-carbamoyl-D-amino acid amidohydrolase                                         |  |  |  |  |
| MSM0501 | phycocyanin alpha phycocyanobilin lyase, CpcE                                   |  |  |  |  |
| MSM0502 | ATP-dependent helicase, Lhr-like                                                |  |  |  |  |
| MSM0503 | flavodoxin, FldA                                                                |  |  |  |  |
| MSM0504 | conserved hypothetical protein                                                  |  |  |  |  |
| MSM0505 | hypothetical protein                                                            |  |  |  |  |
| MSM0506 | ATP-utilizing enzyme, ATP-grasp superfamily                                     |  |  |  |  |
| MSM0507 | predicted phosphoesterase, YfcE                                                 |  |  |  |  |
| MSM0508 | cell division protein J (23S rRNA methylase), FtsJ                              |  |  |  |  |
| MSM0509 | conserved hypothetical protein                                                  |  |  |  |  |
| MSM0510 | predicted ATPase involved in DNA replication control, MCM2/3/5 family           |  |  |  |  |
| MSM0511 | translation initiation factor 2, beta subunit (aIF-2beta)                       |  |  |  |  |
| MSM0512 | NMD3-related protein (nonsense mediated mRNA decay)                             |  |  |  |  |
| MSM0513 | tyrosyl-tRNA synthetase, TyrS                                                   |  |  |  |  |
| MSM0514 | conserved hypothetical protein                                                  |  |  |  |  |
| MSM0515 | methanol:cobalamin methyltransferase, MtaB                                      |  |  |  |  |
| MSM0516 | corrinoid protein (methionine synthase-related), MtaC                           |  |  |  |  |
| MSM0517 | methyltransferase activation protein, MapA                                      |  |  |  |  |
| MSM0518 | methylcobalamin:coenzyme M methyltransferase, MtaA                              |  |  |  |  |
| MSM0519 | conserved hypothetical protein                                                  |  |  |  |  |
| MSM0520 | thymidylate kinase, Tmk                                                         |  |  |  |  |
| MSM0521 | conserved hypothetical membrane protein                                         |  |  |  |  |
| MSM0522 | collagenase, peptidase family U32                                               |  |  |  |  |
| MSM0523 | collagenase, peptidase family U32                                               |  |  |  |  |
| MSM0524 | DNA mismatch repair ATPase, MutS                                                |  |  |  |  |
| MSM0525 | predicted unusual protein kinase, ubiquinone biosynthesis protein-related, AarF |  |  |  |  |
| MSM0526 | conserved hypothetical protein                                                  |  |  |  |  |
| MSM0527 | IS element ISM1 (ICSNY family)                                                  |  |  |  |  |
| MSM0528 | IS element ISM1 (ICSNY family)                                                  |  |  |  |  |
| MSM0529 | hypothetical protein                                                            |  |  |  |  |
| MSM0530 | predicted O-linked GlcNAc transferase                                           |  |  |  |  |
| MSM0531 | adenine/cytosine DNA methyltransferase                                          |  |  |  |  |
| MSM0532 | IS element ISM1 (ICSNY family)                                                  |  |  |  |  |
| MSM0533 | IS element ISM1 (ICSNY family)                                                  |  |  |  |  |
| MSM0534 | IS element ISM1 (ICSNY family)                                                  |  |  |  |  |
| MSM0535 | hypothetical protein                                                            |  |  |  |  |
| MSM0536 | hypothetical protein                                                            |  |  |  |  |
| MSM0537 | TPR-repeat protein                                                              |  |  |  |  |
| MSM0538 | pyruvate formate-lyase activating enzyme, PflA                                  |  |  |  |  |
| MSM0539 | putative DNA-directed DNA polymerase                                            |  |  |  |  |
| MSM0540 | predicted transcriptional regulator                                             |  |  |  |  |
| MSM0541 | hypothetical protein                                                            |  |  |  |  |
| MSM0542 | coenzyme F420-dependent N5,N10-methylene tetrahydromethanopterin reductase, Mer |  |  |  |  |
| MSM0543 | DNA repair photolyase, SplB                                                     |  |  |  |  |
| MSM0544 | predicted Fe-S oxidoreductase                                                   |  |  |  |  |
| MSM0545 | conserved hypothetical protein                                                  |  |  |  |  |
| MSM0546 | conserved hypothetical protein                                                  |  |  |  |  |
| MSM0547 | predicted nucleotidyltransferase, cytidyltransferase-related                    |  |  |  |  |
| MSM0548 | 6-phosphogluconate dehydrogenase, beta-hydroxyacid dehydrogenase related, MmsB  |  |  |  |  |
| MSM0549 | cytochrome C-type biogenesis protein, DsbD                                      |  |  |  |  |
| MSM0550 | protein disulfide-isomerase, thioredoxin-related                                |  |  |  |  |
| MSM0551 | conserved hypothetical protein                                                  |  |  |  |  |
| MSM0552 | sulfur transfer protein involved in thiamine biosynthesis                       |  |  |  |  |
| MSM0553 | ATPase, PP-loop superfamily                                                     |  |  |  |  |
| MSM0554 | protein containing von Willebrand factor type A (vWA) domain, CoxE              |  |  |  |  |
| MSM0555 | MoxR-like ATPase                                                                |  |  |  |  |
| MSM0556 | dihydropteroate synthase                                                        |  |  |  |  |
| MSM0557 | pyruvate:ferredoxin oxidoreductase, gamma subunit, PorG                         |  |  |  |  |
| MSM0558 | pyruvate:ferredoxin oxidoreductase, delta subunit, PorD                         |  |  |  |  |
| MSM0559 | pyruvate:ferredoxin oxidoreductase, alpha subunit, PorA                         |  |  |  |  |
| MSM0560 | pyruvate:ferredoxin oxidoreductase, beta subunit, PorB                          |  |  |  |  |
| MSM0561 | formate dehydrogenase, iron-sulfur subunit                                      |  |  |  |  |
| MSM0562 | formate dehydrogenase, iron-sulfur subunit                                      |  |  |  |  |
| MSM0563 | fumarate hydratase, alpha subunit                                               |  |  |  |  |
| MSM0564 | phosphate uptake regulator, PhoU                                                |  |  |  |  |
| MSM0565 | phosphate ABC transporter, ATPase component, PstB                               |  |  |  |  |
| MSM0566 | phosphate ABC transporter, permease component, PstA                             |  |  |  |  |
| MSM0567 | phosphate ABC transporter, permease component, PstC                             |  |  |  |  |
| MSM0568 | phosphate ABC transporter, phosphate-binding component, PstS                    |  |  |  |  |



|         |                                                                                                 |  |  |    |  |
|---------|-------------------------------------------------------------------------------------------------|--|--|----|--|
| MSM0569 | phosphate transport system regulator related protein, PhoU                                      |  |  |    |  |
| MSM0570 | conserved hypothetical protein                                                                  |  |  |    |  |
| MSM0571 | conserved hypothetical protein                                                                  |  |  |    |  |
| MSM0572 | H2-forming N5,N10-methylenetetrahydromethanopterin dehydrogenase (coenzyme F420-dependent), Mth |  |  |    |  |
| MSM0573 | biotin synthetase, BioB                                                                         |  |  |    |  |
| MSM0574 | conserved hypothetical protein                                                                  |  |  |    |  |
| MSM0575 | conserved hypothetical protein                                                                  |  |  |    |  |
| MSM0576 | NIF3-related protein (NGG1p interacting factor 3)                                               |  |  |    |  |
| MSM0577 | predicted dinucleotide-utilizing enzyme, ThiF/HesA family                                       |  |  |    |  |
| MSM0578 | conserved hypothetical protein                                                                  |  |  |    |  |
| MSM0579 | polyferredoxin, iron-sulfur binding                                                             |  |  |    |  |
| MSM0580 | putative adhesin-like protein                                                                   |  |  |    |  |
| MSM0581 | conserved hypothetical membrane protein                                                         |  |  |    |  |
| MSM0582 | peptide methionine sulfoxide reductase, PMSR                                                    |  |  |    |  |
| MSM0583 | cobalt ABC transporter, permease component, CbiM                                                |  |  |    |  |
| MSM0584 | cobalt ABC transporter, permease component                                                      |  |  |    |  |
| MSM0585 | cobalt ABC transporter, permease component, CbiQ                                                |  |  |    |  |
| MSM0586 | cobalt ABC transporter, ATPase component, CbiO                                                  |  |  |    |  |
| MSM0587 | conserved hypothetical protein                                                                  |  |  |    |  |
| MSM0588 | ferrous iron transport protein A, FeoA                                                          |  |  |    |  |
| MSM0589 | ferrous iron transport protein B, FeoB                                                          |  |  |    |  |
| MSM0590 | hypothetical protein                                                                            |  |  |    |  |
| MSM0591 | hypothetical protein                                                                            |  |  |    |  |
| MSM0592 | conserved hypothetical protein                                                                  |  |  |    |  |
| MSM0593 | multidrug ABC transporter, ATPase component, CcmA                                               |  |  |    |  |
| MSM0594 | multidrug ABC transporter, permease component                                                   |  |  |    |  |
| MSM0595 | multidrug ABC transporter, permease component                                                   |  |  |    |  |
| MSM0596 | bacterial type II secretion system protein, GspF                                                |  |  |    |  |
| MSM0597 | bacterial type II/IV secretion system protein kinase, GspE                                      |  |  |    |  |
| MSM0598 | SAM-dependent methyltransferase                                                                 |  |  |    |  |
| MSM0599 | conserved hypothetical membrane protein                                                         |  |  |    |  |
| MSM0600 | transcriptional regulator, MarR family                                                          |  |  |    |  |
| MSM0601 | putative transposase                                                                            |  |  | ND |  |
| MSM0602 | translation elongation factor EF-1, beta subunit                                                |  |  |    |  |
| MSM0603 | predicted Zn-ribbon RNA-binding protein involved in translation                                 |  |  |    |  |
| MSM0604 | predicted archaeal aspartate/glutamate/uridylate kinase                                         |  |  |    |  |
| MSM0605 | peptidyl-tRNA hydrolase, PTH2 family                                                            |  |  |    |  |
| MSM0606 | hypothetical protein                                                                            |  |  |    |  |
| MSM0607 | predicted ATPase, RNase L inhibitor family                                                      |  |  |    |  |
| MSM0608 | putative metal-binding protein                                                                  |  |  |    |  |
| MSM0609 | ferredoxin, iron-sulfur binding                                                                 |  |  |    |  |
| MSM0610 | aspartate aminotransferase                                                                      |  |  |    |  |
| MSM0611 | DNA repair protein, RadB                                                                        |  |  |    |  |
| MSM0612 | putative translation factor, Sua5/YciO/YrdC/YwC family                                          |  |  |    |  |
| MSM0613 | phosphatidylglycerophosphate synthase, PgsA                                                     |  |  |    |  |
| MSM0614 | conserved hypothetical protein                                                                  |  |  |    |  |
| MSM0615 | archaeal fructose 1,6-bisphosphatase                                                            |  |  |    |  |
| MSM0616 | adhesin-like protein                                                                            |  |  |    |  |
| MSM0617 | thiamine biosynthesis ATP pyrophosphatase, ThiI                                                 |  |  |    |  |
| MSM0618 | pH regulator (monovalent cation:H+ antiporter)                                                  |  |  |    |  |
| MSM0619 | alanyl-tRNA synthetase, AlaS                                                                    |  |  |    |  |
| MSM0620 | ribosomal protein L12p                                                                          |  |  |    |  |
| MSM0621 | ribosomal protein L10p                                                                          |  |  |    |  |
| MSM0622 | ribosomal protein L1p                                                                           |  |  |    |  |
| MSM0623 | ribosomal protein L11                                                                           |  |  |    |  |
| MSM0624 | transcription antiterminator, NusG                                                              |  |  |    |  |
| MSM0625 | protein translocation complex sec61, gamma subunit                                              |  |  |    |  |
| MSM0626 | cell division protein, FtsZ                                                                     |  |  |    |  |
| MSM0627 | tetrahydromethanopterin S-methyltransferase, subunit H, MtrH                                    |  |  |    |  |
| MSM0628 | conserved hypothetical protein                                                                  |  |  |    |  |
| MSM0629 | putative transposase                                                                            |  |  | ND |  |
| MSM0630 | conserved hypothetical protein                                                                  |  |  |    |  |
| MSM0631 | transcription initiation factor IIE, alpha subunit                                              |  |  |    |  |
| MSM0632 | predicted hydrolase, HD superfamily                                                             |  |  |    |  |
| MSM0633 | archaeosine tRNA-ribosyltransferase                                                             |  |  |    |  |
| MSM0634 | predicted metal-sulfur cluster biosynthetic enzyme                                              |  |  |    |  |
| MSM0635 | predicted regulator of amino acid metabolism                                                    |  |  |    |  |
| MSM0636 | hydrogenase expression/formation protein, HypC                                                  |  |  |    |  |
| MSM0637 | dihydrolipoamide dehydrogenase                                                                  |  |  |    |  |
| MSM0638 | pfam match to MurG; not predicted to be a carbohydrate active enzyme by CAZy                    |  |  |    |  |
| MSM0639 | putative cell wall biosynthesis protein                                                         |  |  |    |  |
| MSM0640 | cell division protein (RNA-binding), PelA                                                       |  |  |    |  |
| MSM0641 | prephenate dehydrogenase (NADP+)                                                                |  |  |    |  |
| MSM0642 | cell division control protein Cdc48, AAA+ ATPase family                                         |  |  |    |  |

|         |                                                                                      |  |  |  |  |
|---------|--------------------------------------------------------------------------------------|--|--|--|--|
| MSM0643 | conserved hypothetical protein                                                       |  |  |  |  |
| MSM0644 | thiamine biosynthesis protein, ThiC                                                  |  |  |  |  |
| MSM0645 | ATP-dependent DNA ligase, Cdc9                                                       |  |  |  |  |
| MSM0646 | conserved hypothetical protein                                                       |  |  |  |  |
| MSM0647 | predicted RNA-binding protein, contains TRAM domain                                  |  |  |  |  |
| MSM0648 | phosphomannomutase, ManB                                                             |  |  |  |  |
| MSM0649 | conserved hypothetical protein                                                       |  |  |  |  |
| MSM0650 | transcriptional regulator, TetR/AcrR family                                          |  |  |  |  |
| MSM0651 | best blast hit to MTH_1585; not predicted to be a carbohydrate active enzyme by CAZy |  |  |  |  |
| MSM0652 | pyruvate formate-lyase activating enzyme, PflA                                       |  |  |  |  |
| MSM0653 | histidinol-phosphate aminotransferase, HisC                                          |  |  |  |  |
| MSM0654 | carbonic anhydrase, Cab                                                              |  |  |  |  |
| MSM0655 | glucose-1-phosphate thymidyltransferase                                              |  |  |  |  |
| MSM0656 | phosphomannomutase, ManB                                                             |  |  |  |  |
| MSM0657 | phosphoglycerate mutase, AP superfamily                                              |  |  |  |  |
| MSM0658 | hypothetical protein                                                                 |  |  |  |  |
| MSM0659 | conserved hypothetical membrane protein                                              |  |  |  |  |
| MSM0660 | LemA protein                                                                         |  |  |  |  |
| MSM0661 | small subunit ribosomal protein S3Ae                                                 |  |  |  |  |
| MSM0662 | putative flagellar protein, Flil                                                     |  |  |  |  |
| MSM0663 | dinitrogenase iron-molybdenum cofactor biosynthesis protein, NifX_NifB family        |  |  |  |  |
| MSM0664 | multimeric flavodoxin, NADPH-dependent FMN reductase family                          |  |  |  |  |
| MSM0665 | 5'-methylthioadenosine phosphorylase                                                 |  |  |  |  |
| MSM0666 | conserved hypothetical protein                                                       |  |  |  |  |
| MSM0667 | conserved hypothetical protein                                                       |  |  |  |  |
| MSM0668 | conserved hypothetical protein                                                       |  |  |  |  |
| MSM0669 | hypothetical protein                                                                 |  |  |  |  |
| MSM0670 | conserved hypothetical protein                                                       |  |  |  |  |
| MSM0671 | cell division control protein Cdc6-related, AAA+ ATPase superfamily                  |  |  |  |  |
| MSM0672 | thiamine pyrophosphokinase                                                           |  |  |  |  |
| MSM0673 | conserved hypothetical membrane protein                                              |  |  |  |  |
| MSM0674 | hypothetical protein                                                                 |  |  |  |  |
| MSM0675 | hypothetical protein                                                                 |  |  |  |  |
| MSM0676 | conserved hypothetical membrane protein                                              |  |  |  |  |
| MSM0677 | archaeal aspartate aminotransferase                                                  |  |  |  |  |
| MSM0678 | conserved hypothetical membrane protein                                              |  |  |  |  |
| MSM0679 | conserved hypothetical membrane protein                                              |  |  |  |  |
| MSM0680 | predicted ATPase, AAA+ superfamily                                                   |  |  |  |  |
| MSM0681 | conserved hypothetical protein                                                       |  |  |  |  |
| MSM0682 | hypothetical protein                                                                 |  |  |  |  |
| MSM0683 | conserved hypothetical protein                                                       |  |  |  |  |
| MSM0684 | conserved hypothetical protein                                                       |  |  |  |  |
| MSM0685 | hypothetical protein                                                                 |  |  |  |  |
| MSM0686 | acetolactate synthase (TPP-requiring), large subunit, IlvB                           |  |  |  |  |
| MSM0687 | deoxycytidine-triphosphate deaminase, Dcd                                            |  |  |  |  |
| MSM0688 | 4-oxalocrotonate tautomerase                                                         |  |  |  |  |
| MSM0689 | hypothetical protein                                                                 |  |  |  |  |
| MSM0690 | helicase                                                                             |  |  |  |  |
| MSM0691 | mutator mutT protein (NUDIX domain)                                                  |  |  |  |  |
| MSM0692 | conserved hypothetical protein                                                       |  |  |  |  |
| MSM0693 | ATPase involved in DNA repair, SbcC                                                  |  |  |  |  |
| MSM0694 | hypothetical protein                                                                 |  |  |  |  |
| MSM0695 | DNA repair helicase                                                                  |  |  |  |  |
| MSM0696 | Fe-S oxidoreductase                                                                  |  |  |  |  |
| MSM0697 | hypothetical protein                                                                 |  |  |  |  |
| MSM0698 | hypothetical protein                                                                 |  |  |  |  |
| MSM0699 | Na <sup>+</sup> -dependent transporter, SNF family                                   |  |  |  |  |
| MSM0700 | putative poly-gamma-glutamate synthesis protein, PgsA                                |  |  |  |  |
| MSM0701 | signal recognition particle GTPase SRP54                                             |  |  |  |  |
| MSM0702 | predicted prefoldin, alpha subunit                                                   |  |  |  |  |
| MSM0703 | ribosomal protein LX                                                                 |  |  |  |  |
| MSM0704 | translation initiation factor 6 (aIF-6)                                              |  |  |  |  |
| MSM0705 | ribosomal protein L31a                                                               |  |  |  |  |
| MSM0706 | ribosomal protein L39a                                                               |  |  |  |  |
| MSM0707 | predicted subunit of tRNA methyltransferase                                          |  |  |  |  |
| MSM0708 | dsDNA-binding protein                                                                |  |  |  |  |
| MSM0709 | ribosomal protein S16a                                                               |  |  |  |  |
| MSM0710 | RNA-binding protein, CRS1/YhbY family                                                |  |  |  |  |
| MSM0711 | ribonuclease P, subunit RPR2                                                         |  |  |  |  |
| MSM0712 | conserved hypothetical protein (DUF1696 domain)                                      |  |  |  |  |
| MSM0713 | predicted nucleotide kinase                                                          |  |  |  |  |
| MSM0714 | predicted GTPase                                                                     |  |  |  |  |
| MSM0715 | predicted GTPase                                                                     |  |  |  |  |
| MSM0716 | oligosaccharyl transferase, STT3 subunit                                             |  |  |  |  |

|         |                                                                                           |  |  |  |  |
|---------|-------------------------------------------------------------------------------------------|--|--|--|--|
| MSM0717 | DNA topoisomerase I, TopA                                                                 |  |  |  |  |
| MSM0718 | conserved hypothetical protein                                                            |  |  |  |  |
| MSM0719 | phosphoserine phosphatase, HAD family, SerB                                               |  |  |  |  |
| MSM0720 | transcription initiation factor TFIID TATA binding protein                                |  |  |  |  |
| MSM0721 | adenylate cyclase, class 2                                                                |  |  |  |  |
| MSM0722 | 2-isopropylmalate synthase, LeuA                                                          |  |  |  |  |
| MSM0723 | 3-isopropylmalate dehydratase, LeuC                                                       |  |  |  |  |
| MSM0724 | 4-hydroxybenzoate synthetase (chorismate lyase)                                           |  |  |  |  |
| MSM0725 | DNA repair flap structure-specific 5'-3' endonuclease                                     |  |  |  |  |
| MSM0726 | conserved hypothetical protein                                                            |  |  |  |  |
| MSM0727 | S-adenosylhomocysteine hydrolase (adenosylhomocysteinase), AhcY                           |  |  |  |  |
| MSM0728 | predicted oxidoreductase, aldo/keto reductase family                                      |  |  |  |  |
| MSM0729 | molybdopterin biosynthesis protein, MoeB                                                  |  |  |  |  |
| MSM0730 | putative transposase                                                                      |  |  |  |  |
| MSM0731 | putative DNA helicase II, UvrD                                                            |  |  |  |  |
| MSM0732 | tRNA pseudouridine synthase B, TruB                                                       |  |  |  |  |
| MSM0733 | ribosomal protein L14e                                                                    |  |  |  |  |
| MSM0734 | cytidylate kinase, Cmk                                                                    |  |  |  |  |
| MSM0735 | ribosomal protein L34e                                                                    |  |  |  |  |
| MSM0736 | conserved hypothetical membrane protein                                                   |  |  |  |  |
| MSM0737 | archaeal adenylate kinase, AdkA                                                           |  |  |  |  |
| MSM0738 | preprotein translocase, SecY subunit, SecY                                                |  |  |  |  |
| MSM0739 | ribosomal protein L15p                                                                    |  |  |  |  |
| MSM0740 | ribosomal protein L30p                                                                    |  |  |  |  |
| MSM0741 | ribosomal protein S5p, RpsE                                                               |  |  |  |  |
| MSM0742 | ribosomal protein L18p, RplR                                                              |  |  |  |  |
| MSM0743 | ribosomal protein L19e                                                                    |  |  |  |  |
| MSM0744 | ribosomal protein L32e                                                                    |  |  |  |  |
| MSM0745 | ribosomal protein L6p, RplF                                                               |  |  |  |  |
| MSM0746 | ribosomal protein S8p                                                                     |  |  |  |  |
| MSM0747 | ribosomal protein S14p                                                                    |  |  |  |  |
| MSM0748 | ribosomal protein L5p                                                                     |  |  |  |  |
| MSM0749 | ribosomal protein S4e                                                                     |  |  |  |  |
| MSM0750 | ribosomal protein L24p                                                                    |  |  |  |  |
| MSM0751 | ribosomal protein L14p                                                                    |  |  |  |  |
| MSM0752 | ribosomal protein S17p                                                                    |  |  |  |  |
| MSM0753 | ribonuclease P, subunit P29                                                               |  |  |  |  |
| MSM0754 | translation initiation factor SUI1                                                        |  |  |  |  |
| MSM0755 | ribosomal protein L29p                                                                    |  |  |  |  |
| MSM0756 | ribosomal protein S3p                                                                     |  |  |  |  |
| MSM0757 | ribosomal protein L22p                                                                    |  |  |  |  |
| MSM0758 | ribosomal protein S19p                                                                    |  |  |  |  |
| MSM0759 | ribosomal protein L2p                                                                     |  |  |  |  |
| MSM0760 | ribosomal protein L23p                                                                    |  |  |  |  |
| MSM0761 | ribosomal protein L1e                                                                     |  |  |  |  |
| MSM0762 | ribosomal protein L3p                                                                     |  |  |  |  |
| MSM0763 | conserved hypothetical protein                                                            |  |  |  |  |
| MSM0764 | ribosomal L11 RNA methyltransferase (SAM-dependent)                                       |  |  |  |  |
| MSM0765 | pyruvate carboxylase (acetyl-CoA/biotin carboxylase), subunit A, PycA                     |  |  |  |  |
| MSM0766 | biotin-[acetyl-CoA-carboxylase] ligase/biotin operon regulator bifunctional protein, BirA |  |  |  |  |
| MSM0767 | selenocysteine synthase, SelA                                                             |  |  |  |  |
| MSM0768 | conserved hypothetical protein                                                            |  |  |  |  |
| MSM0769 | fumarate hydratase, class I                                                               |  |  |  |  |
| MSM0770 | cobalt ABC transporter, ATPase component, CbiO                                            |  |  |  |  |
| MSM0771 | cobalt ABC transporter, permease component, CbiQ                                          |  |  |  |  |
| MSM0772 | predicted permease, major facilitator superfamily                                         |  |  |  |  |
| MSM0773 | multidrug ABC transporter, ATPase component                                               |  |  |  |  |
| MSM0774 | multidrug ABC transporter, ATPase component                                               |  |  |  |  |
| MSM0775 | transcriptional regulator, AraC family                                                    |  |  |  |  |
| MSM0776 | conserved hypothetical membrane protein                                                   |  |  |  |  |
| MSM0777 | conserved hypothetical protein                                                            |  |  |  |  |
| MSM0778 | predicted RNA-binding protein, eukaryotic snRNP-like                                      |  |  |  |  |
| MSM0779 | predicted Zn-dependent hydrolase, metallo-beta-lactamase superfamily                      |  |  |  |  |
| MSM0780 | conserved hypothetical protein                                                            |  |  |  |  |
| MSM0781 | conserved hypothetical protein                                                            |  |  |  |  |
| MSM0782 | hypothetical protein                                                                      |  |  |  |  |
| MSM0783 | tungsten formylmethanofuran dehydrogenase, subunit F, FwdF                                |  |  |  |  |
| MSM0784 | ferredoxin                                                                                |  |  |  |  |
| MSM0785 | predicted phosphopantetheine adenylyltransferase (PPAT)                                   |  |  |  |  |
| MSM0786 | transglutaminase-like protein, putative cysteine protease                                 |  |  |  |  |
| MSM0787 | Fe-S oxidoreductase                                                                       |  |  |  |  |
| MSM0788 | aspartate aminotransferase                                                                |  |  |  |  |

|         |                                                                                        |  |  |  |  |
|---------|----------------------------------------------------------------------------------------|--|--|--|--|
| MSM0789 | cation efflux system protein (zinc/cadmium/cobalt)                                     |  |  |  |  |
| MSM0790 | CBS-domain-containing protein                                                          |  |  |  |  |
| MSM0791 | 2-phosphoglycerate kinase                                                              |  |  |  |  |
| MSM0792 | predicted calcineurin-like phosphoesterase                                             |  |  |  |  |
| MSM0793 | conserved hypothetical protein                                                         |  |  |  |  |
| MSM0794 | conserved hypothetical protein                                                         |  |  |  |  |
| MSM0795 | heterodisulfide reductase, subunit B, HdrB                                             |  |  |  |  |
| MSM0796 | heterodisulfide reductase, subunit C, HdrC                                             |  |  |  |  |
| MSM0797 | archaeosine tRNA-ribosyltransferase                                                    |  |  |  |  |
| MSM0798 | hypothetical protein                                                                   |  |  |  |  |
| MSM0799 | conserved hypothetical protein                                                         |  |  |  |  |
| MSM0800 | hypothetical protein                                                                   |  |  |  |  |
| MSM0801 | diphthine synthase, DphB                                                               |  |  |  |  |
| MSM0802 | methyltransferase                                                                      |  |  |  |  |
| MSM0803 | predicted metal-dependent membrane protease, CAAX amino terminal protease family       |  |  |  |  |
| MSM0804 | translation initiation factor aIF-2B, alpha subunit                                    |  |  |  |  |
| MSM0805 | polar amino acid ABC transporter, ATPase component                                     |  |  |  |  |
| MSM0806 | polar amino acid ABC transporter, permease component                                   |  |  |  |  |
| MSM0807 | polar amino acid ABC transporter, substrate-binding component                          |  |  |  |  |
| MSM0808 | nitrogenase iron-molybdenum cofactor biosynthesis protein, NifB                        |  |  |  |  |
| MSM0809 | conserved hypothetical protein                                                         |  |  |  |  |
| MSM0810 | activator of (R)-2-hydroxyglutaryl-CoA dehydratase                                     |  |  |  |  |
| MSM0811 | conserved hypothetical protein                                                         |  |  |  |  |
| MSM0812 | conserved hypothetical protein                                                         |  |  |  |  |
| MSM0813 | predicted peptidyl-prolyl cis-trans isomerase                                          |  |  |  |  |
| MSM0814 | phosphoribosylformylglycinamide synthase-related protein (selenophosphate synthetase)  |  |  |  |  |
| MSM0815 | conserved hypothetical protein                                                         |  |  |  |  |
| MSM0816 | predicted nucleic acid-binding protein, PIN domain-like family                         |  |  |  |  |
| MSM0817 | predicted transcriptional regulator                                                    |  |  |  |  |
| MSM0818 | predicted transcriptional regulator                                                    |  |  |  |  |
| MSM0819 | putative transcription regulator, ArsR family                                          |  |  |  |  |
| MSM0820 | molybdenum cofactor biosynthesis protein, MoaB                                         |  |  |  |  |
| MSM0821 | orotate phosphoribosyltransferase, PyrE                                                |  |  |  |  |
| MSM0822 | photosynthetic reaction centre cytoplasmic domain-containing protein                   |  |  |  |  |
| MSM0823 | phosphoenolpyruvate synthase/pyruvate phosphate dikinase, PpsA                         |  |  |  |  |
| MSM0824 | putative N-acetyltransferase, GNAT family                                              |  |  |  |  |
| MSM0825 | adenosylcobinamide amidohydrolase, CbiZ                                                |  |  |  |  |
| MSM0826 | chaperonin, Cpn60/TCP-1/thermosome family, GroL                                        |  |  |  |  |
| MSM0827 | predicted metal-dependent hydrolase, cyclase family                                    |  |  |  |  |
| MSM0828 | best blast hit to Msp_0220; not predicted to be a carbohydrate active enzyme by CAZy   |  |  |  |  |
| MSM0829 | aspartate-semialdehyde dehydrogenase, Asd                                              |  |  |  |  |
| MSM0830 | dihydrodipicolinate reductase, DapB                                                    |  |  |  |  |
| MSM0831 | dihydrodipicolinate synthase, DapA                                                     |  |  |  |  |
| MSM0832 | aspartokinase, alpha subunit                                                           |  |  |  |  |
| MSM0833 | ribosomal protein S17a                                                                 |  |  |  |  |
| MSM0834 | chorismate mutase                                                                      |  |  |  |  |
| MSM0835 | archaeal shikimate kinase                                                              |  |  |  |  |
| MSM0836 | related to alpha-glycosyltransferases, GT4 family                                      |  |  |  |  |
| MSM0837 | cobalamin biosynthesis protein D, CbiD                                                 |  |  |  |  |
| MSM0838 | putative thioredoxin/glutaredoxin                                                      |  |  |  |  |
| MSM0839 | ATP-dependent helicase                                                                 |  |  |  |  |
| MSM0840 | conserved hypothetical protein                                                         |  |  |  |  |
| MSM0841 | photosynthetic reaction centre cytoplasmic domain containing protein                   |  |  |  |  |
| MSM0842 | histone acetyltransferase, radical SAM superfamily                                     |  |  |  |  |
| MSM0843 | 2-deoxyribose-5-phosphate aldolase (DERA), DeoC                                        |  |  |  |  |
| MSM0844 | archaeal histone, HmtA                                                                 |  |  |  |  |
| MSM0845 | 2-methylthioadenine synthetase, MiaB                                                   |  |  |  |  |
| MSM0846 | uncharacterized archaeal Zn-finger protein                                             |  |  |  |  |
| MSM0847 | archaeal 3-isopropylmalate dehydratase, small subunit, LeuD                            |  |  |  |  |
| MSM0848 | ribofuranosylaminobenzene 5'-phosphate synthase, RfaS                                  |  |  |  |  |
| MSM0849 | molybdenum cofactor biosynthesis-related protein, MoaA                                 |  |  |  |  |
| MSM0850 | predicted CDP-diglyceride synthetase                                                   |  |  |  |  |
| MSM0851 | predicted transcriptional regulator                                                    |  |  |  |  |
| MSM0852 | predicted ATP-utilizing enzyme                                                         |  |  |  |  |
| MSM0853 | UDP-N-acetylglucosamine 2-epimerase, WecB                                              |  |  |  |  |
| MSM0854 | hypothetical protein                                                                   |  |  |  |  |
| MSM0855 | archaeal tRNA pseudouridine synthase A, TruA                                           |  |  |  |  |
| MSM0856 | antimicrobial peptide ABC transporter, permease component                              |  |  |  |  |
| MSM0857 | antimicrobial peptide ABC transporter, ATPase component                                |  |  |  |  |
| MSM0858 | phosphoribosylformimino-5-aminoimidazole carboxamide ribotide (ProFAR) isomerase, HisA |  |  |  |  |

|         |                                                                                        |  |  |    |  |
|---------|----------------------------------------------------------------------------------------|--|--|----|--|
| MSM0859 | glycerol-3-phosphate cytidyltransferase                                                |  |  |    |  |
| MSM0860 | aspartate-semialdehyde dehydrogenase, ArgC                                             |  |  |    |  |
| MSM0861 | flavodoxin                                                                             |  |  |    |  |
| MSM0862 | aspartate carbamoyltransferase regulatory chain, Pylr                                  |  |  |    |  |
| MSM0863 | pyridoxamine-phosphate oxidase (FMN-binding)                                           |  |  |    |  |
| MSM0864 | predicted transcriptional regulator                                                    |  |  |    |  |
| MSM0865 | putative glucose-methanol-choline oxidoreductase (FAD-dependent)                       |  |  |    |  |
| MSM0866 | Zn metalloprotease, TldD                                                               |  |  |    |  |
| MSM0867 | AMMECR1-related protein                                                                |  |  |    |  |
| MSM0868 | hypothetical protein                                                                   |  |  |    |  |
| MSM0869 | GTPase, GTP1/OBG family                                                                |  |  |    |  |
| MSM0870 | molecular chaperone (small heat shock protein), HSP20/alpha crystallin family          |  |  |    |  |
| MSM0871 | putative transposase                                                                   |  |  | ND |  |
| MSM0872 | glucosamine:fructose-6-phosphate aminotransferase (isomerizing), AgaS                  |  |  |    |  |
| MSM0873 | conserved hypothetical protein                                                         |  |  |    |  |
| MSM0874 | adenine deaminase, AdeC                                                                |  |  |    |  |
| MSM0875 | lysine-oxoglutarate reductase/Saccharopine dehydrogenase (LOR/SDH) bifunctional enzyme |  |  |    |  |
| MSM0876 | arginase/agmatinase/formimionoglutamate hydrolase, SpeB                                |  |  |    |  |
| MSM0877 | translation initiation factor 5A (aIF-5A)                                              |  |  |    |  |
| MSM0878 | pyruvoyl-dependent arginine decarboxylase, PdaD                                        |  |  |    |  |
| MSM0879 | Poly(P)/ATP NAD kinase, inositol monophosphatase family, PpnK                          |  |  |    |  |
| MSM0880 | UDP-N-acetylmuramyl tripeptide synthetase (Mur ligase)                                 |  |  |    |  |
| MSM0881 | porphobilinogen deaminase                                                              |  |  |    |  |
| MSM0882 | 3-chlorobenzoate-3,4-dioxygenase dyhydrogenase                                         |  |  |    |  |
| MSM0883 | orotate phosphoribosyltransferase                                                      |  |  |    |  |
| MSM0884 | adhesin-like protein                                                                   |  |  |    |  |
| MSM0885 | adhesin-like protein                                                                   |  |  |    |  |
| MSM0886 | hypothetical protein                                                                   |  |  |    |  |
| MSM0887 | universal stress protein, adenine nucleotide alpha hydrolase-like family               |  |  |    |  |
| MSM0888 | glutamate dehydrogenase (NADP+), GdhA                                                  |  |  |    |  |
| MSM0889 | hypothetical protein                                                                   |  |  |    |  |
| MSM0890 | hypothetical protein                                                                   |  |  |    |  |
| MSM0891 | peptide chain release factor eRF, subunit 1                                            |  |  |    |  |
| MSM0892 | putative zinc-binding protein                                                          |  |  |    |  |
| MSM0893 | acetyltransferase                                                                      |  |  |    |  |
| MSM0894 | conserved hypothetical protein                                                         |  |  |    |  |
| MSM0895 | cation transport ATPase, HAD family                                                    |  |  |    |  |
| MSM0896 | precorrin-6X reductase, CbiJ                                                           |  |  |    |  |
| MSM0897 | ribosomal protein S10p                                                                 |  |  |    |  |
| MSM0898 | translation elongation factor 1-alpha (EF-Tu)                                          |  |  |    |  |
| MSM0899 | translation elongation factor EF-2, FusA                                               |  |  |    |  |
| MSM0900 | ribosomal protein S7p                                                                  |  |  |    |  |
| MSM0901 | ribosomal protein S12p                                                                 |  |  |    |  |
| MSM0902 | methyl-coenzyme M reductase, alpha subunit, McrA                                       |  |  |    |  |
| MSM0903 | methyl-coenzyme M reductase, gamma subunit, McrG                                       |  |  |    |  |
| MSM0904 | methyl-coenzyme M reductase, D subunit, McrD                                           |  |  |    |  |
| MSM0905 | methyl-coenzyme M reductase, beta subunit, McrB                                        |  |  |    |  |
| MSM0906 | transcription termination factor, NusA                                                 |  |  |    |  |
| MSM0907 | ribosomal protein L17Ae                                                                |  |  |    |  |
| MSM0908 | DNA-dependent RNA polymerase, subunit A, RpoA                                          |  |  |    |  |
| MSM0909 | DNA-dependent RNA polymerase, subunit A', RpoA                                         |  |  |    |  |
| MSM0910 | DNA-dependent RNA polymerase, subunit B', RpoB                                         |  |  |    |  |
| MSM0911 | DNA-dependent RNA polymerase, subunit B, RpoB                                          |  |  |    |  |
| MSM0912 | DNA-dependent RNA polymerase, subunit H, RpoH                                          |  |  |    |  |
| MSM0913 | hypothetical protein                                                                   |  |  |    |  |
| MSM0914 | predicted O-linked GlcNAc transferase                                                  |  |  |    |  |
| MSM0915 | hypothetical protein                                                                   |  |  |    |  |
| MSM0916 | hydroxyethylthiazole kinase, ThiM                                                      |  |  |    |  |
| MSM0917 | thiamine monophosphate synthase, ThiE                                                  |  |  |    |  |
| MSM0918 | 3-phosphoglycerate kinase, Pqk                                                         |  |  |    |  |
| MSM0919 | triosephosphate isomerase, TpiA                                                        |  |  |    |  |
| MSM0920 | conserved hypothetical protein                                                         |  |  |    |  |
| MSM0921 | predicted surface protein                                                              |  |  |    |  |
| MSM0922 | Fe-S oxidoreductase                                                                    |  |  |    |  |
| MSM0923 | multimeric flavodoxin                                                                  |  |  |    |  |
| MSM0924 | succinyl-CoA synthetase, beta subunit, SucC                                            |  |  |    |  |
| MSM0925 | 2-oxoglutarate ferredoxin oxidoreductase, gamma subunit, KorC                          |  |  |    |  |
| MSM0926 | 2-oxoglutarate ferredoxin oxidoreductase, beta subunit, KorB                           |  |  |    |  |
| MSM0927 | 2-oxoglutarate ferredoxin oxidoreductase, alpha subunit, KorA                          |  |  |    |  |
| MSM0928 | 2-oxoglutarate ferredoxin oxidoreductase, delta subunit, KorD                          |  |  |    |  |
| MSM0929 | fumarate hydratase, FumA                                                               |  |  |    |  |
| MSM0930 | peptidyl-prolyl cis-trans isomerase, FKBP-type                                         |  |  |    |  |

|         |                                                                               |  |  |  |  |
|---------|-------------------------------------------------------------------------------|--|--|--|--|
| MSM0931 | conserved hypothetical protein                                                |  |  |  |  |
| MSM0932 | conserved hypothetical protein                                                |  |  |  |  |
| MSM0933 | cobalamin-5-phosphate synthase, CobS                                          |  |  |  |  |
| MSM0934 | predicted phosphatidylglycerophosphatase A-related protein                    |  |  |  |  |
| MSM0935 | conserved hypothetical protein                                                |  |  |  |  |
| MSM0936 | transcription regulator-related ATPase, ExsB                                  |  |  |  |  |
| MSM0937 | HD superfamily hydrolase                                                      |  |  |  |  |
| MSM0938 | hypothetical protein                                                          |  |  |  |  |
| MSM0939 | pyruvate carboxylase, subunit B, PycB                                         |  |  |  |  |
| MSM0940 | myo-inositol-1-phosphate synthase                                             |  |  |  |  |
| MSM0941 | prenyltransferase, UbiA                                                       |  |  |  |  |
| MSM0942 | conserved hypothetical membrane protein                                       |  |  |  |  |
| MSM0943 | conserved hypothetical protein                                                |  |  |  |  |
| MSM0944 | CMP-N-acetylneuraminic acid synthetase, NeuA                                  |  |  |  |  |
| MSM0945 | hydrogenase expression/formation protein, HypD                                |  |  |  |  |
| MSM0946 | archaeal sucrose-phosphate phosphatase (SPP-like), HAD family                 |  |  |  |  |
| MSM0947 | predicted zinc metalloprotease, modulator of DNA gyrase                       |  |  |  |  |
| MSM0948 | hypothetical protein                                                          |  |  |  |  |
| MSM0949 | transcriptional activator                                                     |  |  |  |  |
| MSM0950 | molybdopterin biosynthesis protein, MoeA                                      |  |  |  |  |
| MSM0951 | translation initiation factor aIF-1A                                          |  |  |  |  |
| MSM0952 | serine/threonine protein kinase, RIO1 family                                  |  |  |  |  |
| MSM0953 | conserved hypothetical membrane protein                                       |  |  |  |  |
| MSM0954 | predicted RNA-binding protein                                                 |  |  |  |  |
| MSM0955 | type II DNA topoisomerase VI, subunit B                                       |  |  |  |  |
| MSM0956 | type II DNA topoisomerase VI, subunit A                                       |  |  |  |  |
| MSM0957 | adhesin-like protein                                                          |  |  |  |  |
| MSM0958 | predicted 1,4-beta-cellobiosidase                                             |  |  |  |  |
| MSM0959 | conserved hypothetical protein                                                |  |  |  |  |
| MSM0960 | cation transport ATPase, HAD family                                           |  |  |  |  |
| MSM0961 | heavy-metal cation transporting ATPase                                        |  |  |  |  |
| MSM0962 | glyceraldehyde 3-phosphate dehydrogenase, GapA                                |  |  |  |  |
| MSM0963 | endonuclease IV, xylose isomerase-like TIM barrel family, Nfo                 |  |  |  |  |
| MSM0964 | calcineurin-like phosphoesterase                                              |  |  |  |  |
| MSM0965 | 3-hydroxyacyl-CoA dehydrogenase, FadB                                         |  |  |  |  |
| MSM0966 | predicted 26S protease regulatory subunit (ATP-dependent), AAA+ family ATPase |  |  |  |  |
| MSM0967 | glutamyl-tRNA reductase, HemaA                                                |  |  |  |  |
| MSM0968 | bifunctional precorrin-2 oxidase/chelatase (siroheme synthase), CysG          |  |  |  |  |
| MSM0969 | predicted metal-binding transcription factor                                  |  |  |  |  |
| MSM0970 | conserved hypothetical protein                                                |  |  |  |  |
| MSM0971 | methyl-coenzyme M reductase, component A2                                     |  |  |  |  |
| MSM0972 | tRNA-dihydrouridine synthase                                                  |  |  |  |  |
| MSM0973 | GTP cyclohydrolase III, GGDN family                                           |  |  |  |  |
| MSM0974 | LPPG:FO 2-phospho-L-lactate transferase, CofD                                 |  |  |  |  |
| MSM0975 | F420-0:gamma-glutamyl ligase, CofE                                            |  |  |  |  |
| MSM0976 | archaeal IMP cyclohydrolase, PurO                                             |  |  |  |  |
| MSM0977 | putative biopolymer transport protein, ExbD/TolR family                       |  |  |  |  |
| MSM0978 | biopolymer transport protein, MotA/TolQ/ExbB proton channel family            |  |  |  |  |
| MSM0979 | ribonuclease HII, RnhB                                                        |  |  |  |  |
| MSM0980 | rod shape-determining protein, MreB/Mrl family                                |  |  |  |  |
| MSM0981 | conserved hypothetical protein                                                |  |  |  |  |
| MSM0982 | phosphatidylserine synthase, PssA                                             |  |  |  |  |
| MSM0983 | conserved hypothetical protein                                                |  |  |  |  |
| MSM0984 | sortase (surface protein transpeptidase), SrtA                                |  |  |  |  |
| MSM0985 | conserved hypothetical protein                                                |  |  |  |  |
| MSM0986 | conjugated bile acid hydrolase (CBAH)                                         |  |  |  |  |
| MSM0987 | tyrosine decarboxylase, MfnA                                                  |  |  |  |  |
| MSM0988 | phosphoenolpyruvate synthase, PpsA                                            |  |  |  |  |
| MSM0989 | ribosomal protein L10e                                                        |  |  |  |  |
| MSM0990 | nitrate/sulfonate/bicarbonate ABC transporter, ATPase component               |  |  |  |  |
| MSM0991 | nitrate/sulfonate/bicarbonate ABC transporter, substrate-binding component    |  |  |  |  |
| MSM0992 | conserved hypothetical protein                                                |  |  |  |  |
| MSM0993 | putative ATPase, glucocorticoid receptor-like (DNA-binding domain) family     |  |  |  |  |
| MSM0994 | predicted nucleotidyltransferase                                              |  |  |  |  |
| MSM0995 | adhesin-like protein                                                          |  |  |  |  |
| MSM0996 | adhesin-like protein                                                          |  |  |  |  |
| MSM0997 | dihydroorotase, PyrC                                                          |  |  |  |  |
| MSM0998 | polyferredoxin, MvhB                                                          |  |  |  |  |
| MSM0999 | methyl viologen-reducing hydrogenase, alpha subunit, MvhA                     |  |  |  |  |
| MSM1000 | methyl viologen-reducing hydrogenase, gamma subunit, MvhG                     |  |  |  |  |
| MSM1001 | methyl viologen-reducing hydrogenase, delta subunit, MvhD                     |  |  |  |  |

|         |                                                                                 |  |  |  |  |
|---------|---------------------------------------------------------------------------------|--|--|--|--|
| MSM1002 | ABC transporter involved in Fe-S cluster assembly, permease component           |  |  |  |  |
| MSM1003 | ABC transporter involved in Fe-S cluster assembly, ATPase component             |  |  |  |  |
| MSM1004 | photosynthetic reaction centre cytoplasmic domain containing protein            |  |  |  |  |
| MSM1005 | GTP:adenosylcobinamide-phosphate guanylyltransferase                            |  |  |  |  |
| MSM1006 | conserved hypothetical protein                                                  |  |  |  |  |
| MSM1007 | N5-methyl-tetrahydromethanopterin:coenzyme M methyltransferase, subunit H, MtrH |  |  |  |  |
| MSM1008 | N5-methyl-tetrahydromethanopterin:coenzyme M methyltransferase, subunit G, MtrG |  |  |  |  |
| MSM1009 | N5-methyl-tetrahydromethanopterin:coenzyme M methyltransferase, subunit F, MtrF |  |  |  |  |
| MSM1010 | N5-methyl-tetrahydromethanopterin:coenzyme M methyltransferase, subunit A, MtrA |  |  |  |  |
| MSM1011 | N5-methyl-tetrahydromethanopterin:coenzyme M methyltransferase, subunit B, MtrB |  |  |  |  |
| MSM1012 | N5-methyl-tetrahydromethanopterin:coenzyme M methyltransferase, subunit C, MtrC |  |  |  |  |
| MSM1013 | N5-methyl-tetrahydromethanopterin:coenzyme M methyltransferase, subunit D, MtrD |  |  |  |  |
| MSM1014 | N5-methyl-tetrahydromethanopterin:coenzyme M methyltransferase, subunit E, MtrE |  |  |  |  |
| MSM1015 | methyl-coenzyme M reductase, alpha subunit, McrA                                |  |  |  |  |
| MSM1016 | methyl-coenzyme M reductase, gamma subunit, McrG                                |  |  |  |  |
| MSM1017 | methyl-coenzyme M reductase, C subunit, McrC                                    |  |  |  |  |
| MSM1018 | methyl-coenzyme M reductase, D subunit, McrD                                    |  |  |  |  |
| MSM1019 | methyl-coenzyme M reductase, beta subunit, McrB                                 |  |  |  |  |
| MSM1020 | Fe-S oxidoreductase, Radical SAM family                                         |  |  |  |  |
| MSM1021 | uncharacterized protein related to methyl coenzyme M reductase subunit C (McrC) |  |  |  |  |
| MSM1022 | conserved hypothetical protein                                                  |  |  |  |  |
| MSM1023 | 2-phosphosulpholactate phosphatase, ComB, (coenzyme M biosynthesis)             |  |  |  |  |
| MSM1024 | pheromone shutdown protein, TraB family                                         |  |  |  |  |
| MSM1025 | conserved hypothetical protein                                                  |  |  |  |  |
| MSM1026 | hemolysin-related protein, transporter-associated family, TlyC                  |  |  |  |  |
| MSM1027 | Ca <sup>2+</sup> /Na <sup>+</sup> antiporter (K <sup>+</sup> -dependent)        |  |  |  |  |
| MSM1028 | predicted ATPase, PP-loop family                                                |  |  |  |  |
| MSM1029 | conserved hypothetical protein                                                  |  |  |  |  |
| MSM1030 | predicted pyridoxal phosphate-dependent enzyme                                  |  |  |  |  |
| MSM1031 | N <sup>2</sup> ,N <sup>2</sup> -dimethylguanosine tRNA methyltransferase, Trm1  |  |  |  |  |
| MSM1032 | transcriptional regulator, Lrp family                                           |  |  |  |  |
| MSM1033 | conserved hypothetical protein                                                  |  |  |  |  |
| MSM1034 | conserved hypothetical protein                                                  |  |  |  |  |
| MSM1035 | FO synthase subunit 1 (SAM-dependent), CofG (F420 biosynthesis)                 |  |  |  |  |
| MSM1036 | predicted methyltransferase                                                     |  |  |  |  |
| MSM1037 | proteasome, beta subunit                                                        |  |  |  |  |
| MSM1038 | predicted metal-dependent RNase                                                 |  |  |  |  |
| MSM1039 | phosphoribosylformylglycinamide cyclo-ligase (AIRS), PurM                       |  |  |  |  |
| MSM1040 | malate/L-lactate dehydrogenase                                                  |  |  |  |  |
| MSM1041 | DNA-dependent DNA polymerase I, PolB1                                           |  |  |  |  |
| MSM1042 | predicted permease                                                              |  |  |  |  |
| MSM1043 | dihydroorotate dehydrogenase electron transfer subunit, PyrK                    |  |  |  |  |
| MSM1044 | dihydroorotate dehydrogenase, PyrD                                              |  |  |  |  |
| MSM1045 | possible glycosyltransferase                                                    |  |  |  |  |
| MSM1046 | pre-mRNA splicing ribonucleoprotein PRP31                                       |  |  |  |  |
| MSM1047 | fibrillar-like pre-rRNA processing protein, FlpA                                |  |  |  |  |
| MSM1048 | phosphopantothenoylcysteine synthetase/decarboxylase                            |  |  |  |  |
| MSM1049 | phosphopantothenoylcysteine synthetase/decarboxylase                            |  |  |  |  |
| MSM1050 | conserved hypothetical protein                                                  |  |  |  |  |
| MSM1051 | putative endoglucanase                                                          |  |  |  |  |
| MSM1052 | prephenate dehydratase, PheA                                                    |  |  |  |  |
| MSM1053 | IMP dehydrogenase related protein                                               |  |  |  |  |
| MSM1054 | IMP dehydrogenase related protein                                               |  |  |  |  |
| MSM1055 | coenzyme PQQ synthesis protein, SAM family                                      |  |  |  |  |
| MSM1056 | 6-pyruvoyl-tetrahydropterin synthase                                            |  |  |  |  |
| MSM1057 | conserved hypothetical protein                                                  |  |  |  |  |
| MSM1058 | conserved hypothetical protein                                                  |  |  |  |  |
| MSM1059 | predicted RecB family exonuclease                                               |  |  |  |  |
| MSM1060 | energy-converting hydrogenase B, subunit Q, EhbQ                                |  |  |  |  |
| MSM1061 | energy-converting hydrogenase B, subunit P, EhbP                                |  |  |  |  |
| MSM1062 | energy-converting hydrogenase B, subunit O, EhbO                                |  |  |  |  |
| MSM1063 | energy-converting hydrogenase B, subunit N, EhbN                                |  |  |  |  |
| MSM1064 | energy-converting hydrogenase B, subunit M, EhbM                                |  |  |  |  |

|         |                                                                                 |  |  |    |  |
|---------|---------------------------------------------------------------------------------|--|--|----|--|
| MSM1065 | energy-converting hydrogenase B, subunit L, EhbL                                |  |  |    |  |
| MSM1066 | energy-converting hydrogenase B, subunit K, EhbK                                |  |  |    |  |
| MSM1067 | energy-converting hydrogenase B, subunit J, EhbJ                                |  |  |    |  |
| MSM1068 | energy-converting hydrogenase B, subunit I, EhbI                                |  |  |    |  |
| MSM1069 | energy-converting hydrogenase B, subunit H, EhbH                                |  |  |    |  |
| MSM1070 | energy-converting hydrogenase B, subunit G, EhbG                                |  |  |    |  |
| MSM1071 | energy-converting hydrogenase B, subunit F, EhbF                                |  |  |    |  |
| MSM1072 | energy-converting hydrogenase B, subunit E, EhbE                                |  |  |    |  |
| MSM1073 | energy-converting hydrogenase B, subunit D, EhbD                                |  |  |    |  |
| MSM1074 | energy-converting hydrogenase B, subunit C, EhbC                                |  |  |    |  |
| MSM1075 | energy-converting hydrogenase B, subunit B, EhbB                                |  |  |    |  |
| MSM1076 | energy-converting hydrogenase B, subunit A, EhbA                                |  |  |    |  |
| MSM1077 | putative permease (transport)                                                   |  |  |    |  |
| MSM1078 | predicted bile acid/sodium symporter                                            |  |  |    |  |
| MSM1079 | predicted membrane-bound metal-dependent hydrolase, NCS2 family                 |  |  |    |  |
| MSM1080 | predicted deacylase                                                             |  |  |    |  |
| MSM1081 | transcriptional regulator (enhancer-binding protein), DNA2/NAM7 helicase family |  |  |    |  |
| MSM1082 | hypothetical protein                                                            |  |  |    |  |
| MSM1083 | conserved hypothetical membrane protein                                         |  |  |    |  |
| MSM1084 | argininosuccinate synthase, ArgG                                                |  |  |    |  |
| MSM1085 | aquaporin, MIP superfamily, AqpM                                                |  |  |    |  |
| MSM1086 | conserved hypothetical protein                                                  |  |  |    |  |
| MSM1087 | NAD-dependent protein deacetylase, SIR2 family                                  |  |  |    |  |
| MSM1088 | hypothetical protein                                                            |  |  |    |  |
| MSM1089 | hypothetical protein                                                            |  |  |    |  |
| MSM1090 | sugar fermentation stimulation protein, SfsA                                    |  |  |    |  |
| MSM1091 | sugar kinase, YjeF-related protein family                                       |  |  |    |  |
| MSM1092 | formylmethanofuran:tetrahydromethanopterin formyltransferase, Ftr               |  |  |    |  |
| MSM1093 | putative transposase                                                            |  |  | ND |  |
| MSM1094 | conserved hypothetical integral membrane protein                                |  |  |    |  |
| MSM1095 | Trk-type potassium transport system, membrane component, TrkH                   |  |  |    |  |
| MSM1096 | Trk-type potassium transport system, NAD-binding component, TrkA                |  |  |    |  |
| MSM1097 | Zn-dependent hydrolase                                                          |  |  |    |  |
| MSM1098 | archaeal holliday junction resolvase                                            |  |  |    |  |
| MSM1099 | biotin synthase related protein                                                 |  |  |    |  |
| MSM1100 | conserved hypothetical protein                                                  |  |  |    |  |
| MSM1101 | Asp-tRNA(Asn)/Glu-tRNA(Gln) amidotransferase, B subunit, GatB                   |  |  |    |  |
| MSM1102 | IMP dehydrogenase related protein                                               |  |  |    |  |
| MSM1103 | phosphoribosyl-ATP pyrophosphohydrolase, HisE                                   |  |  |    |  |
| MSM1104 | acetyltransferase, GNAT family                                                  |  |  |    |  |
| MSM1105 | NCAIR mutase related protein, PurE                                              |  |  |    |  |
| MSM1106 | hydrogenase maturation factor, HypF                                             |  |  |    |  |
| MSM1107 | predicted transcriptional regulator                                             |  |  |    |  |
| MSM1108 | molecular chaperone GrpE                                                        |  |  |    |  |
| MSM1109 | molecular chaperone DnaK                                                        |  |  |    |  |
| MSM1110 | molecular chaperone DnaJ                                                        |  |  |    |  |
| MSM1111 | adhesin-like protein                                                            |  |  |    |  |
| MSM1112 | adhesin-like protein                                                            |  |  |    |  |
| MSM1113 | adhesin-like protein                                                            |  |  |    |  |
| MSM1114 | adhesin-like protein                                                            |  |  |    |  |
| MSM1115 | putative transposase                                                            |  |  | ND |  |
| MSM1116 | adhesin-like protein                                                            |  |  |    |  |
| MSM1117 | cobalamin biosynthesis protein N, CobN                                          |  |  |    |  |
| MSM1118 | conserved hypothetical protein                                                  |  |  |    |  |
| MSM1119 | conserved hypothetical protein                                                  |  |  |    |  |
| MSM1120 | methionine aminopeptidase, Map                                                  |  |  |    |  |
| MSM1121 | coenzyme F420-reducing hydrogenase, beta subunit, FrhB                          |  |  |    |  |
| MSM1122 | coenzyme F420-reducing hydrogenase, gamma subunit, FrhG                         |  |  |    |  |
| MSM1123 | coenzyme F420-reducing hydrogenase, delta subunit, FrhD                         |  |  |    |  |
| MSM1124 | coenzyme F420-reducing hydrogenase, alpha subunit, FrhA                         |  |  |    |  |
| MSM1125 | predicted endoglucanase (CobN-related)                                          |  |  |    |  |
| MSM1126 | predicted transcriptional regulator, ArsR family                                |  |  |    |  |
| MSM1127 | cation transport ATPase, HAD family                                             |  |  |    |  |
| MSM1128 | hypothetical protein                                                            |  |  |    |  |
| MSM1129 | conserved hypothetical protein                                                  |  |  |    |  |
| MSM1130 | conserved hypothetical protein                                                  |  |  |    |  |
| MSM1131 | conserved hypothetical protein                                                  |  |  |    |  |
| MSM1132 | ribosome biogenesis protein Nop10                                               |  |  |    |  |
| MSM1133 | translation initiation factor aIF-2, alpha subunit                              |  |  |    |  |
| MSM1134 | ribosomal protein S27e                                                          |  |  |    |  |
| MSM1135 | ribosomal protein L44e                                                          |  |  |    |  |
| MSM1136 | conserved hypothetical protein                                                  |  |  |    |  |
| MSM1137 | DNA polymerase sliding clamp subunit, PCNA family, Pcn                          |  |  |    |  |
| MSM1138 | predicted glutamine amidotransferase, CobB/CobQ-like family                     |  |  |    |  |



|         |                                                                             |  |    |  |  |
|---------|-----------------------------------------------------------------------------|--|----|--|--|
| MSM1139 | cell wall biosynthesis protein, MurD-like peptide ligase family             |  |    |  |  |
| MSM1140 | hypothetical protein                                                        |  |    |  |  |
| MSM1141 | tryptophan synthase, alpha subunit, TrpA                                    |  |    |  |  |
| MSM1142 | tryptophan synthase, beta subunit, TrpB                                     |  |    |  |  |
| MSM1143 | indole-3-glycerol phosphate synthase, TrpC                                  |  |    |  |  |
| MSM1144 | anthranilate phosphoribosyltransferase, TrpD                                |  |    |  |  |
| MSM1145 | anthranilate/para-aminobenzoate synthase component II, TrpG                 |  |    |  |  |
| MSM1146 | anthranilate/para-aminobenzoate synthase component I, TrpE                  |  |    |  |  |
| MSM1147 | hypothetical protein                                                        |  |    |  |  |
| MSM1148 | predicted metal-dependent membrane protease                                 |  |    |  |  |
| MSM1149 | conserved hypothetical membrane protein                                     |  |    |  |  |
| MSM1150 | predicted transcriptional regulator                                         |  |    |  |  |
| MSM1151 | adenylosuccinate lyase, PurB                                                |  |    |  |  |
| MSM1152 | conserved hypothetical membrane protein                                     |  |    |  |  |
| MSM1153 | cation transport ATPase, HAD family                                         |  |    |  |  |
| MSM1154 | metal-dependent amidohydrolase                                              |  |    |  |  |
| MSM1155 | conserved hypothetical protein                                              |  |    |  |  |
| MSM1156 | tRNA pseudouridine synthase D, TruD                                         |  |    |  |  |
| MSM1157 | hypothetical protein                                                        |  |    |  |  |
| MSM1158 | hydrogenase expression/formation protein, HypE                              |  |    |  |  |
| MSM1159 | glutamine amidotransferase, HisH                                            |  |    |  |  |
| MSM1160 | nitrogenase molybdenum-iron protein, NifD                                   |  |    |  |  |
| MSM1161 | hypothetical protein                                                        |  |    |  |  |
| MSM1162 | conserved hypothetical protein                                              |  |    |  |  |
| MSM1163 | hypothetical protein                                                        |  |    |  |  |
| MSM1164 | predicted GTPase, HSR1-related family                                       |  |    |  |  |
| MSM1165 | predicted phosphohydrolase (metal-dependent)                                |  |    |  |  |
| MSM1166 | conserved hypothetical membrane protein                                     |  |    |  |  |
| MSM1167 | cobalt precorrin-6Y C5,15-methyltransferase, CbiE                           |  |    |  |  |
| MSM1168 | putative adhesin-like protein                                               |  |    |  |  |
| MSM1169 | hypothetical protein                                                        |  |    |  |  |
| MSM1170 | arsenite-transporting ATPase                                                |  |    |  |  |
| MSM1171 | ammonia-dependent NAD <sup>+</sup> synthetase, NadE                         |  |    |  |  |
| MSM1172 | leucyl-tRNA synthetase, LeuS                                                |  |    |  |  |
| MSM1173 | tRNA(1-methyladenosine) methyltransferase                                   |  |    |  |  |
| MSM1174 | heat shock protein HtpX (Zn-dependent)                                      |  |    |  |  |
| MSM1175 | conserved hypothetical membrane protein                                     |  |    |  |  |
| MSM1176 | replication factor C, small subunit, RfcS                                   |  |    |  |  |
| MSM1177 | replication factor C, large subunit, RfcL                                   |  |    |  |  |
| MSM1178 | putative ATPase implicated in cell cycle control                            |  |    |  |  |
| MSM1179 | shikimate 5-dehydrogenase, AroE                                             |  |    |  |  |
| MSM1180 | predicted metal-dependent membrane protease                                 |  |    |  |  |
| MSM1181 | histidyl-tRNA synthetase, HisS                                              |  |    |  |  |
| MSM1182 | phosphoribosyl-AMP cyclohydrolase, HisI                                     |  |    |  |  |
| MSM1183 | ATPase, PilT family                                                         |  |    |  |  |
| MSM1184 | sugar phosphate isomerase/epimerase, AP endonuclease family 2               |  |    |  |  |
| MSM1185 | methylated-DNA-[protein]-cysteine S-methyltransferase                       |  |    |  |  |
| MSM1186 | potassium transport system, membrane component, KefB                        |  |    |  |  |
| MSM1187 | ERCC4-like helicase                                                         |  |    |  |  |
| MSM1188 | adhesin-like protein                                                        |  |    |  |  |
| MSM1189 | putative transposase                                                        |  |    |  |  |
| MSM1190 | cell wall biosynthesis protein, UDP-N-acetylmuramate-alanine ligase family  |  | ND |  |  |
| MSM1191 | cell wall biosynthesis protein, MurD-like peptide ligase family             |  |    |  |  |
| MSM1192 | conserved hypothetical protein                                              |  |    |  |  |
| MSM1193 | single-stranded DNA-specific exonuclease, DHH family                        |  |    |  |  |
| MSM1194 | ribosomal protein S15p                                                      |  |    |  |  |
| MSM1195 | xanthosine triphosphate pyrophosphatase, Ham1 family                        |  |    |  |  |
| MSM1196 | predicted archaeal ATPase, AAA+ superfamily                                 |  |    |  |  |
| MSM1197 | predicted ATPase, AAA+ superfamily                                          |  |    |  |  |
| MSM1198 | O-sialoglycoprotein endopeptidase                                           |  |    |  |  |
| MSM1199 | conserved hypothetical protein                                              |  |    |  |  |
| MSM1200 | phosphoribosyltransferase, CobT                                             |  |    |  |  |
| MSM1201 | undecaprenyl-diphosphatase, UppP                                            |  |    |  |  |
| MSM1202 | branched-chain-amino-acid aminotransferase, IlvE                            |  |    |  |  |
| MSM1203 | Zn-dependent protease, peptidase M48 family                                 |  |    |  |  |
| MSM1204 | coenzyme F420-dependent methylenetetrahydromethanopterin dehydrogenase, Mtd |  |    |  |  |
| MSM1205 | conserved hypothetical membrane protein                                     |  |    |  |  |
| MSM1206 | imidazoleglycerol-phosphate dehydrogenase, HisB                             |  |    |  |  |
| MSM1207 | molybdate transport system regulatory protein                               |  |    |  |  |
| MSM1208 | teichoic acid transporter                                                   |  |    |  |  |
| MSM1209 | multimeric flavodoxin                                                       |  |    |  |  |
| MSM1210 | efflux pump antibiotic resistance protein, MFS permease family              |  |    |  |  |
| MSM1211 | putative phosphoserine phosphatase                                          |  |    |  |  |
| MSM1212 | conserved hypothetical protein                                              |  |    |  |  |

|         |                                                                           |  |  |  |  |
|---------|---------------------------------------------------------------------------|--|--|--|--|
| MSM1213 | 3-hexulose 6-phosphate synthase/formaldehyde activating enzyme            |  |  |  |  |
| MSM1214 | threonyl-tRNA synthetase, ThrS                                            |  |  |  |  |
| MSM1215 | cobyrinic acid a,c-diamide synthase, CbiA                                 |  |  |  |  |
| MSM1216 | conserved hypothetical membrane protein                                   |  |  |  |  |
| MSM1217 | type II restriction endonuclease                                          |  |  |  |  |
| MSM1218 | predicted acid phosphatase (survival protein), SurE                       |  |  |  |  |
| MSM1219 | hypothetical protein                                                      |  |  |  |  |
| MSM1220 | small nucleolar ribonucleoprotein, Sm-like family                         |  |  |  |  |
| MSM1221 | actin-like ATPase                                                         |  |  |  |  |
| MSM1222 | ketol-acid reductoisomerase, IlvC                                         |  |  |  |  |
| MSM1223 | carbonic anhydrase                                                        |  |  |  |  |
| MSM1224 | acetolactate synthase, small subunit (regulatory), IlvH                   |  |  |  |  |
| MSM1225 | acetolactate synthase, large subunit (TPP-requiring), IlvB                |  |  |  |  |
| MSM1226 | ornithine carbamoyltransferase, ArgF                                      |  |  |  |  |
| MSM1227 | phosphoribosylamine-glycine ligase, PurD                                  |  |  |  |  |
| MSM1228 | Na <sup>+</sup> -driven multidrug efflux pump                             |  |  |  |  |
| MSM1229 | Na <sup>+</sup> -driven multidrug efflux pump                             |  |  |  |  |
| MSM1230 | transcriptional regulator, MarR family                                    |  |  |  |  |
| MSM1231 | arginyl-tRNA synthetase, ArgS                                             |  |  |  |  |
| MSM1232 | signal peptidase I                                                        |  |  |  |  |
| MSM1233 | glutamate-1-semialdehyde 2,1-aminomutase, HemL                            |  |  |  |  |
| MSM1234 | cobalt-precorrin-8X methylmutase, CbiC                                    |  |  |  |  |
| MSM1235 | predicted flavoprotein                                                    |  |  |  |  |
| MSM1236 | aspartyl-tRNA synthetase, AspS                                            |  |  |  |  |
| MSM1237 | dihydroxy-acid dehydratase, IlvD                                          |  |  |  |  |
| MSM1238 | histidinol dehydrogenase, HisD                                            |  |  |  |  |
| MSM1239 | predicted DNA-binding protein                                             |  |  |  |  |
| MSM1240 | predicted AAA ATPase                                                      |  |  |  |  |
| MSM1241 | chromosome partitioning ATPase                                            |  |  |  |  |
| MSM1242 | tryptophan synthase, beta subunit, TrpB                                   |  |  |  |  |
| MSM1243 | putative actin-like ATPase                                                |  |  |  |  |
| MSM1244 | predicted metal-dependent phosphoesterases, PHP family                    |  |  |  |  |
| MSM1245 | archaeal DNA-binding protein, AlbA                                        |  |  |  |  |
| MSM1246 | isopropylmalate synthase, LeuA                                            |  |  |  |  |
| MSM1247 | serine/threonine protein kinase related protein (PQQ-binding)             |  |  |  |  |
| MSM1248 | multidrug ABC transporter, permease component                             |  |  |  |  |
| MSM1249 | multidrug ABC transporter, ATPase component                               |  |  |  |  |
| MSM1250 | predicted transcriptional regulator, PadR-like family                     |  |  |  |  |
| MSM1251 | predicted sugar phosphate isomerase/epimerase, AP endonuclease family 2   |  |  |  |  |
| MSM1252 | cation transporting P-type ATPase, HAD family                             |  |  |  |  |
| MSM1253 | glutamyl-tRNA (Gln) amidotransferase subunit A, GatA                      |  |  |  |  |
| MSM1254 | cobyrinic acid synthase                                                   |  |  |  |  |
| MSM1255 | hypothetical protein                                                      |  |  |  |  |
| MSM1256 | 3,4-dihydroxy-2-butanone 4-phosphate synthase, RibB                       |  |  |  |  |
| MSM1257 | predicted transcriptional regulator of riboflavin/FAD biosynthetic operon |  |  |  |  |
| MSM1258 | fumarate reductase/succinate dehydrogenase flavoprotein, Sdh              |  |  |  |  |
| MSM1259 | predicted metal-dependent hydrolase, TRZ/ATZ family                       |  |  |  |  |
| MSM1260 | archaeal histone                                                          |  |  |  |  |
| MSM1261 | ATP phosphoribosyltransferase, HisG                                       |  |  |  |  |
| MSM1262 | flavodoxin (protoporphyrinogen oxidase)                                   |  |  |  |  |
| MSM1263 | aspartate carbamoyltransferase, PyrB                                      |  |  |  |  |
| MSM1264 | cell division control protein 6, Cdc6                                     |  |  |  |  |
| MSM1265 | conserved hypothetical protein                                            |  |  |  |  |
| MSM1266 | cobalamin biosynthesis protein D, CobD                                    |  |  |  |  |
| MSM1267 | cobalamin biosynthesis protein G, CbiG                                    |  |  |  |  |
| MSM1268 | conserved hypothetical protein                                            |  |  |  |  |
| MSM1269 | putative Met repressor-like protein                                       |  |  |  |  |
| MSM1270 | fucose-1-phosphate aldolase, class II aldolase/adducin family             |  |  |  |  |
| MSM1271 | archaeal DNA polymerase II, small subunit                                 |  |  |  |  |
| MSM1272 | conserved hypothetical protein                                            |  |  |  |  |
| MSM1273 | cobalt precorrin-3B C17-methyltransferase, CbiH                           |  |  |  |  |
| MSM1274 | predicted potassium ion transport protein                                 |  |  |  |  |
| MSM1275 | mgtE-like divalent cation transporter                                     |  |  |  |  |
| MSM1276 | conserved hypothetical protein                                            |  |  |  |  |
| MSM1277 | conserved hypothetical membrane protein                                   |  |  |  |  |
| MSM1278 | predicted archaeal ATPase, AAA+ superfamily                               |  |  |  |  |
| MSM1279 | predicted nucleic-acid-binding protein containing a Zn-ribbon             |  |  |  |  |
| MSM1280 | sirohdrochlorin cobaltochelataase, CbiX                                   |  |  |  |  |
| MSM1281 | sirohdrochlorin cobaltochelataase-related protein                         |  |  |  |  |
| MSM1282 | putative adhesin-like protein                                             |  |  |  |  |
| MSM1283 | thiamine monphosphate kinase, ThiL                                        |  |  |  |  |
| MSM1284 | pyruvate formate-lyase activating enzyme, PflA                            |  |  |  |  |
| MSM1285 | conserved hypothetical protein                                            |  |  |  |  |
| MSM1286 | 3-octaprenyl-4-hydroxybenzoate carboxy-lyase, UbiD                        |  |  |  |  |

|         |                                                                               |  |  |  |  |
|---------|-------------------------------------------------------------------------------|--|--|--|--|
| MSM1287 | phosphoribosylaminoimidazole carboxylase (NCAIR mutase), PurE                 |  |  |  |  |
| MSM1288 | conserved hypothetical membrane protein                                       |  |  |  |  |
| MSM1289 | GtrA-like surface polysaccharide biosynthesis protein, GtrA                   |  |  |  |  |
| MSM1290 | glycosyltransferase (related to beta-glycosidases), GT2 family [CAZy]         |  |  |  |  |
| MSM1291 | conserved hypothetical membrane protein                                       |  |  |  |  |
| MSM1292 | transcriptional accessory protein, S1 RNA binding family, Tex                 |  |  |  |  |
| MSM1293 | nitroreductase, NADH oxidase/flavin reductase family                          |  |  |  |  |
| MSM1294 | glycosyltransferase, GT2 family                                               |  |  |  |  |
| MSM1295 | predicted DNA-binding protein                                                 |  |  |  |  |
| MSM1296 | riboflavin synthase, beta subunit, RibH                                       |  |  |  |  |
| MSM1297 | glycosyltransferase, GT2 family                                               |  |  |  |  |
| MSM1298 | 3-isopropylmalate dehydrogenase, LeuB                                         |  |  |  |  |
| MSM1299 | 3-isopropylmalate dehydratase, small subunit, LeuD                            |  |  |  |  |
| MSM1300 | 3-isopropylmalate dehydratase, large subunit, LeuC                            |  |  |  |  |
| MSM1301 | predicted Fe-S oxidoreductase                                                 |  |  |  |  |
| MSM1302 | conserved hypothetical protein                                                |  |  |  |  |
| MSM1303 | UDP-N-acetyl-D-mannosaminuronate dehydrogenase                                |  |  |  |  |
| MSM1304 | dTDP-4-dehydrorhamnose reductase, RfbD                                        |  |  |  |  |
| MSM1305 | adhesin-like protein                                                          |  |  |  |  |
| MSM1306 | adhesin-like protein                                                          |  |  |  |  |
| MSM1307 | dTDP-glucose pyrophosphorylase, RfbA                                          |  |  |  |  |
| MSM1308 | dTDP-4-dehydrorhamnose 3,5-epimerase                                          |  |  |  |  |
| MSM1309 | dTDP-D-glucose 4,6-dehydratase, RfbB                                          |  |  |  |  |
| MSM1310 | glycosyltransferase, GT2 family                                               |  |  |  |  |
| MSM1311 | glycosyltransferase, GT2 family                                               |  |  |  |  |
| MSM1312 | glycosyltransferase, GT2 family                                               |  |  |  |  |
| MSM1313 | distantly related to glycosyltransferases, GT4 family                         |  |  |  |  |
| MSM1314 | hypothetical protein                                                          |  |  |  |  |
| MSM1315 | predicted transcriptional regulator                                           |  |  |  |  |
| MSM1316 | glycosyltransferase, GT2 family                                               |  |  |  |  |
| MSM1317 | distantly related to glycosyltransferases, GT4 family                         |  |  |  |  |
| MSM1318 | conserved hypothetical protein                                                |  |  |  |  |
| MSM1319 | conserved hypothetical protein                                                |  |  |  |  |
| MSM1320 | possible glycosyltransferase                                                  |  |  |  |  |
| MSM1321 | predicted glycosyltransferase, GT2 family                                     |  |  |  |  |
| MSM1322 | distantly related to alpha-glycosyltransferases, GT4 family                   |  |  |  |  |
| MSM1323 | glycosyltransferase, GT2 family                                               |  |  |  |  |
| MSM1324 | glycosyltransferase, GT2 family                                               |  |  |  |  |
| MSM1325 | predicted polysaccharide/polyol phosphate ABC transporter, permease component |  |  |  |  |
| MSM1326 | polysaccharide/polyol phosphate ABC transporter, ATPase component             |  |  |  |  |
| MSM1327 | predicted CDP-glycerol:poly(glycerophosphate) glycerophosphotransferase       |  |  |  |  |
| MSM1328 | glycosyltransferase, GT2 family                                               |  |  |  |  |
| MSM1329 | predicted glycosyltransferase, GT2 family                                     |  |  |  |  |
| MSM1330 | predicted glycosyltransferase, GT2 family                                     |  |  |  |  |
| MSM1331 | bacterial suqar transferase, WcaJ                                             |  |  |  |  |
| MSM1332 | ssDNA-binding protein                                                         |  |  |  |  |
| MSM1333 | DNA repair protein RadA, RadA                                                 |  |  |  |  |
| MSM1334 | predicted permease                                                            |  |  |  |  |
| MSM1335 | hypothetical protein                                                          |  |  |  |  |
| MSM1336 | heterodisulfide reductase, subunit A, HdrA                                    |  |  |  |  |
| MSM1337 | glycine hydroxymethyltransferase, GlyA                                        |  |  |  |  |
| MSM1338 | archaeal flavoprotein                                                         |  |  |  |  |
| MSM1339 | conserved hypothetical protein                                                |  |  |  |  |
| MSM1340 | archaeal S-adenosylmethionine synthetase, MetK                                |  |  |  |  |
| MSM1341 | isoleucyl-tRNA synthetase, IleS                                               |  |  |  |  |
| MSM1342 | phosphoribosylformylglycinamide (FGAM) synthase, PurL                         |  |  |  |  |
| MSM1343 | molybdenum cofactor biosynthesis protein, MoeA                                |  |  |  |  |
| MSM1344 | predicted membrane-associated Zn-dependent protease                           |  |  |  |  |
| MSM1345 | hypothetical protein                                                          |  |  |  |  |
| MSM1346 | conserved hypothetical protein                                                |  |  |  |  |
| MSM1347 | hypothetical protein                                                          |  |  |  |  |
| MSM1348 | rubrythrin                                                                    |  |  |  |  |
| MSM1349 | F420H2-oxidase/flavoprotein, FprA                                             |  |  |  |  |
| MSM1350 | predicted transcriptional regulator, ArsR family                              |  |  |  |  |
| MSM1351 | precocorin-2 C20-methyltransferase, CbiL                                      |  |  |  |  |
| MSM1352 | predicted ATP-dependent DNA helicase                                          |  |  |  |  |
| MSM1353 | putative topoisomerase IV, subunit A                                          |  |  |  |  |
| MSM1354 | DNA-directed RNA polymerase subunit M, RpoM                                   |  |  |  |  |
| MSM1355 | ADP-ribose pyrophosphatase, NUDIX hydrolase family                            |  |  |  |  |
| MSM1356 | DNA-directed RNA polymerase, subunit L, RpoL                                  |  |  |  |  |
| MSM1357 | predicted RNA-binding protein                                                 |  |  |  |  |
| MSM1358 | diphthamide synthase, subunit DPH2                                            |  |  |  |  |

|         |                                                                         |  |  |  |  |
|---------|-------------------------------------------------------------------------|--|--|--|--|
| MSM1359 | adenine phosphoribosyltransferase, Apt                                  |  |  |  |  |
| MSM1360 | signal recognition particle GTPase SRP54                                |  |  |  |  |
| MSM1361 | predicted pseudouridylate synthase                                      |  |  |  |  |
| MSM1362 | molybdenum cofactor biosynthesis protein C, MoaC                        |  |  |  |  |
| MSM1363 | preprotein translocase, SecG subunit, SecG                              |  |  |  |  |
| MSM1364 | imidazoleglycerol-phosphate synthase, HisF                              |  |  |  |  |
| MSM1365 | 3-methyladenine DNA glycosylase/8-oxoguanine DNA glycosylase            |  |  |  |  |
| MSM1366 | lactoylglutathione lyase, LglU                                          |  |  |  |  |
| MSM1367 | peptidyl-prolyl cis-trans isomerase, PpiB                               |  |  |  |  |
| MSM1368 | N-acetylornithine aminotransferase, ArgD                                |  |  |  |  |
| MSM1369 | MutT-related protein, NUDIX family                                      |  |  |  |  |
| MSM1370 | conserved hypothetical membrane protein                                 |  |  |  |  |
| MSM1371 | diaminopimelate decarboxylase, LysA                                     |  |  |  |  |
| MSM1372 | diaminopimelate epimerase, DapF                                         |  |  |  |  |
| MSM1373 | methyltransferase, HemK                                                 |  |  |  |  |
| MSM1374 | dimethyladenosine transferase, KsgA                                     |  |  |  |  |
| MSM1375 | predicted RNA-binding protein                                           |  |  |  |  |
| MSM1376 | DNA-directed RNA polymerase subunit F                                   |  |  |  |  |
| MSM1377 | ribosomal protein L21e                                                  |  |  |  |  |
| MSM1378 | putative monooxygenase, ABM family                                      |  |  |  |  |
| MSM1379 | predicted NADP-dependent alcohol dehydrogenase                          |  |  |  |  |
| MSM1380 | NADP-dependent alcohol dehydrogenase                                    |  |  |  |  |
| MSM1381 | putative NADP-dependent alcohol dehydrogenase                           |  |  |  |  |
| MSM1382 | conserved hypothetical membrane protein                                 |  |  |  |  |
| MSM1383 | anaerobic ribonucleoside-triphosphate reductase, NrdD                   |  |  |  |  |
| MSM1384 | archaeal DNA polymerase II, large subunit, PolC                         |  |  |  |  |
| MSM1385 | predicted acyltransferase                                               |  |  |  |  |
| MSM1386 | cytosine deaminase                                                      |  |  |  |  |
| MSM1387 | lysyl-tRNA synthetase (class I), LysS                                   |  |  |  |  |
| MSM1388 | thiamine biosynthesis protein, ThiC                                     |  |  |  |  |
| MSM1389 | sugar kinase, ribokinase/pfkB superfamily                               |  |  |  |  |
| MSM1390 | transcriptional regulator, LysR family                                  |  |  |  |  |
| MSM1391 | predicted sugar phosphate isomerase involved in capsule formation, GutQ |  |  |  |  |
| MSM1392 | formate dehydrogenase accessory protein FdhD, FdhD                      |  |  |  |  |
| MSM1393 | iron(III) ABC transporter, substrate-binding component                  |  |  |  |  |
| MSM1394 | iron(III) ABC transporter, permease component                           |  |  |  |  |
| MSM1395 | iron(III) ABC transporter, ATPase component                             |  |  |  |  |
| MSM1396 | tungsten formylmethanofuran dehydrogenase, subunit E, FwdE              |  |  |  |  |
| MSM1397 | adhesin-like protein                                                    |  |  |  |  |
| MSM1398 | adhesin-like protein                                                    |  |  |  |  |
| MSM1399 | adhesin-like protein                                                    |  |  |  |  |
| MSM1400 | putative antimicrobial peptide ABC transporter, permease component      |  |  |  |  |
| MSM1401 | biopolymer transport protein                                            |  |  |  |  |
| MSM1402 | conserved hypothetical protein                                          |  |  |  |  |
| MSM1403 | formate/nitrite transporter, FdhC                                       |  |  |  |  |
| MSM1404 | formate dehydrogenase, alpha subunit, FdhA                              |  |  |  |  |
| MSM1405 | formate dehydrogenase, beta subunit, FdhB                               |  |  |  |  |
| MSM1406 | molybdopterin cofactor biosynthesis protein A, MoaA                     |  |  |  |  |
| MSM1407 | molybdopterin-guanine dinucleotide biosynthesis protein B, MobB         |  |  |  |  |
| MSM1408 | tungsten formylmethanofuran dehydrogenase, subunit E, FwdE              |  |  |  |  |
| MSM1409 | tungsten formylmethanofuran dehydrogenase, subunit F, FwdF              |  |  |  |  |
| MSM1410 | tungsten formylmethanofuran dehydrogenase, subunit G, FwdG              |  |  |  |  |
| MSM1411 | tungsten formylmethanofuran dehydrogenase, subunit D, FwdD              |  |  |  |  |
| MSM1412 | tungsten formylmethanofuran dehydrogenase, subunit B, FwdB              |  |  |  |  |
| MSM1413 | tungsten formylmethanofuran dehydrogenase, subunit A, FwdA              |  |  |  |  |
| MSM1414 | tungsten formylmethanofuran dehydrogenase, subunit C, FwdC              |  |  |  |  |
| MSM1415 | conserved hypothetical protein                                          |  |  |  |  |
| MSM1416 | conserved hypothetical protein                                          |  |  |  |  |
| MSM1417 | conserved hypothetical protein                                          |  |  |  |  |
| MSM1418 | glutamine synthetase, GlnA                                              |  |  |  |  |
| MSM1419 | putative transposase                                                    |  |  |  |  |
| MSM1420 | helicase, UvrD/REP family                                               |  |  |  |  |
| MSM1421 | conserved hypothetical membrane protein                                 |  |  |  |  |
| MSM1422 | LemA protein                                                            |  |  |  |  |
| MSM1423 | exopolyphosphatase, GppA                                                |  |  |  |  |
| MSM1424 | polyphosphate kinase, ppk                                               |  |  |  |  |
| MSM1425 | ribosomal protein S13p                                                  |  |  |  |  |
| MSM1426 | ribosomal protein S4p                                                   |  |  |  |  |
| MSM1427 | ribosomal protein S11p                                                  |  |  |  |  |
| MSM1428 | DNA-directed RNA polymerase, subunit D, RpoD                            |  |  |  |  |
| MSM1429 | ribosomal protein L18e                                                  |  |  |  |  |
| MSM1430 | ribosomal protein L13p                                                  |  |  |  |  |
| MSM1431 | ribosomal protein S9p                                                   |  |  |  |  |
| MSM1432 | DNA-directed RNA polymerase, subunit N, RpoN                            |  |  |  |  |
| MSM1433 | DNA-directed RNA polymerase, subunit K, RpoK                            |  |  |  |  |
| MSM1434 | conserved hypothetical protein                                          |  |  |  |  |

|         |                                                                                                      |  |  |  |  |
|---------|------------------------------------------------------------------------------------------------------|--|--|--|--|
| MSM1435 | enolase                                                                                              |  |  |  |  |
| MSM1436 | ferredoxin                                                                                           |  |  |  |  |
| MSM1437 | ribosomal protein S2p                                                                                |  |  |  |  |
| MSM1438 | predicted dioxygenase                                                                                |  |  |  |  |
| MSM1439 | mevalonate kinase                                                                                    |  |  |  |  |
| MSM1440 | predicted archaeal kinase                                                                            |  |  |  |  |
| MSM1441 | isopentenyl-diphosphate delta-isomerase                                                              |  |  |  |  |
| MSM1442 | predicted RNA hydrolase, metallo-beta-lactamase superfamily                                          |  |  |  |  |
| MSM1443 | bifunctional short chain isoprenyl diphosphate synthase, IdsA                                        |  |  |  |  |
| MSM1444 | conserved hypothetical membrane protein                                                              |  |  |  |  |
| MSM1445 | predicted transcriptional regulator                                                                  |  |  |  |  |
| MSM1446 | predicted hydroxylamine reductase, Hcp                                                               |  |  |  |  |
| MSM1447 | conserved hypothetical protein                                                                       |  |  |  |  |
| MSM1448 | SAM-dependent methyltransferase                                                                      |  |  |  |  |
| MSM1449 | putative O-linked GlcNAc transferase                                                                 |  |  |  |  |
| MSM1450 | predicted oxidoreductase, aldo/keto reductase family                                                 |  |  |  |  |
| MSM1451 | best blast hit to TPR repeat protein (Mba); not predicted to be a carbohydrate active enzyme by CAZy |  |  |  |  |
| MSM1452 | glutamyl-tRNA synthetase, GltX                                                                       |  |  |  |  |
| MSM1453 | hypothetical protein                                                                                 |  |  |  |  |
| MSM1454 | predicted ATPase, AAA+ family                                                                        |  |  |  |  |
| MSM1455 | aspartate/tyrosine/aromatic aminotransferase                                                         |  |  |  |  |
| MSM1456 | conserved hypothetical protein                                                                       |  |  |  |  |
| MSM1457 | hypothetical protein                                                                                 |  |  |  |  |
| MSM1458 | hypothetical protein                                                                                 |  |  |  |  |
| MSM1459 | multidrug efflux permease, AraJ                                                                      |  |  |  |  |
| MSM1460 | energy-converting hydrogenase B, subunit K, EhbK                                                     |  |  |  |  |
| MSM1461 | methyl viologen-reducing hydrogenase, delta subunit, MvhD                                            |  |  |  |  |
| MSM1462 | formate dehydrogenase, beta subunit, FdhB                                                            |  |  |  |  |
| MSM1463 | formate dehydrogenase, alpha subunit, FdhA                                                           |  |  |  |  |
| MSM1464 | FlpE-related protein                                                                                 |  |  |  |  |
| MSM1465 | multidrug efflux permease, AraJ                                                                      |  |  |  |  |
| MSM1466 | hypothetical protein                                                                                 |  |  |  |  |
| MSM1467 | hypothetical protein                                                                                 |  |  |  |  |
| MSM1468 | adenylosuccinate synthetase, PurA                                                                    |  |  |  |  |
| MSM1469 | nitrate/sulfonate/bicarbonate ABC transporter, substrate-binding component, TauA                     |  |  |  |  |
| MSM1470 | hypothetical protein                                                                                 |  |  |  |  |
| MSM1471 | acyl-CoA synthetase                                                                                  |  |  |  |  |
| MSM1472 | conserved hypothetical protein                                                                       |  |  |  |  |
| MSM1473 | metal-dependent hydrolase, beta-lactamase superfamily                                                |  |  |  |  |
| MSM1474 | chorismate synthase, AroC                                                                            |  |  |  |  |
| MSM1475 | predicted endonuclease III-related protein                                                           |  |  |  |  |
| MSM1476 | porphobilinogen synthase, HemB                                                                       |  |  |  |  |
| MSM1477 | ATP:dephospho-CoA triphosphoribosyl transferase                                                      |  |  |  |  |
| MSM1478 | phenylalanyl-tRNA synthetase, PheS                                                                   |  |  |  |  |
| MSM1479 | exodeoxyribonuclease, XthA                                                                           |  |  |  |  |
| MSM1480 | predicted hydrolase, HAD superfamily                                                                 |  |  |  |  |
| MSM1481 | DNA-directed DNA polymerase, family B, PolB                                                          |  |  |  |  |
| MSM1482 | hypothetical protein                                                                                 |  |  |  |  |
| MSM1483 | multidrug ABC transporter, ATPase component                                                          |  |  |  |  |
| MSM1484 | multidrug ABC transporter, permease component                                                        |  |  |  |  |
| MSM1485 | putative adhesin-like protein                                                                        |  |  |  |  |
| MSM1486 | ribosomal protein S8e                                                                                |  |  |  |  |
| MSM1487 | conserved hypothetical protein                                                                       |  |  |  |  |
| MSM1488 | cobalt ABC transporter, permease component, CbiM                                                     |  |  |  |  |
| MSM1489 | protein related to formylmethanofuran dehydrogenase subunit E, metal-binding                         |  |  |  |  |
| MSM1490 | conserved hypothetical protein                                                                       |  |  |  |  |
| MSM1491 | protein related to formylmethanofuran dehydrogenase subunit E, metal-binding                         |  |  |  |  |
| MSM1492 | hydrogenase maturation factor, HypE                                                                  |  |  |  |  |
| MSM1493 | conserved hypothetical membrane protein, RDD family                                                  |  |  |  |  |
| MSM1494 | hypothetical protein                                                                                 |  |  |  |  |
| MSM1495 | nuclease, Staphylococcus nuclease-like family                                                        |  |  |  |  |
| MSM1496 | conserved hypothetical protein                                                                       |  |  |  |  |
| MSM1497 | predicted coenzyme PQQ synthesis protein                                                             |  |  |  |  |
| MSM1498 | helicase                                                                                             |  |  |  |  |
| MSM1499 | predicted transcriptional regulator                                                                  |  |  |  |  |
| MSM1500 | ssDNA exonuclease, RecJ                                                                              |  |  |  |  |
| MSM1501 | signal recognition particle, subunit SRP19                                                           |  |  |  |  |
| MSM1502 | UDP-galactopyranose mutase                                                                           |  |  |  |  |
| MSM1503 | glycosyltransferase, GT2 family                                                                      |  |  |  |  |
| MSM1504 | uroporphyrinogen III synthase, HemD                                                                  |  |  |  |  |
| MSM1505 | hypothetical protein                                                                                 |  |  |  |  |
| MSM1506 | hypothetical protein                                                                                 |  |  |  |  |

|         |                                                                         |  |  |  |  |
|---------|-------------------------------------------------------------------------|--|--|--|--|
| MSM1507 | glycosyltransferase, GT2 family                                         |  |  |  |  |
| MSM1508 | hypothetical protein                                                    |  |  |  |  |
| MSM1509 | hypothetical protein                                                    |  |  |  |  |
| MSM1510 | putative SAM-dependent methyltransferase                                |  |  |  |  |
| MSM1511 | hypothetical protein                                                    |  |  |  |  |
| MSM1512 | lipopolysaccharide cholinephosphotransferase, LicD family               |  |  |  |  |
| MSM1513 | aspartate aminotransferase                                              |  |  |  |  |
| MSM1514 | glycerol-3-phosphate cytidyltransferase, TagD                           |  |  |  |  |
| MSM1515 | lipopolysaccharide cholinephosphotransferase, LicD family               |  |  |  |  |
| MSM1516 | histidinol-phosphate aminotransferase, HisC                             |  |  |  |  |
| MSM1517 | ornithine cyclodeaminase                                                |  |  |  |  |
| MSM1518 | IS element ISM1 (ICSNY family)                                          |  |  |  |  |
| MSM1519 | IS element ISM1 (ICSNY family)                                          |  |  |  |  |
| MSM1520 | IS element ISM1 (ICSNY family)                                          |  |  |  |  |
| MSM1521 | hypothetical protein                                                    |  |  |  |  |
| MSM1522 | hypothetical protein                                                    |  |  |  |  |
| MSM1523 | transposase                                                             |  |  |  |  |
| MSM1524 | conserved hypothetical protein                                          |  |  |  |  |
| MSM1525 | conserved hypothetical protein                                          |  |  |  |  |
| MSM1526 | conserved hypothetical membrane protein                                 |  |  |  |  |
| MSM1527 | predicted ATPase, AAA+ superfamily                                      |  |  |  |  |
| MSM1528 | predicted transcriptional regulator, HTH XRE-like family                |  |  |  |  |
| MSM1529 | putative Zn peptidase                                                   |  |  |  |  |
| MSM1530 | putative nucleic acid-binding protein                                   |  |  |  |  |
| MSM1531 | Na <sup>+</sup> -dependent transporter, SNF family                      |  |  |  |  |
| MSM1532 | Na <sup>+</sup> -dependent transporter, SNF family                      |  |  |  |  |
| MSM1533 | adhesin-like protein                                                    |  |  |  |  |
| MSM1534 | adhesin-like protein                                                    |  |  |  |  |
| MSM1535 | predicted dTDP-D-glucose 4,6-dehydratase                                |  |  |  |  |
| MSM1536 | pleiotropic regulatory protein DegT (PLP-dependent)                     |  |  |  |  |
| MSM1537 | predicted acylneuraminate cytidyltransferase, NeuS                      |  |  |  |  |
| MSM1538 | CMP-sialic acid synthetase, NeuA                                        |  |  |  |  |
| MSM1539 | sialic acid synthase, NeuB                                              |  |  |  |  |
| MSM1540 | glycerol-3-phosphate dehydrogenase (NAD)                                |  |  |  |  |
| MSM1541 | hypothetical protein                                                    |  |  |  |  |
| MSM1542 | 4-diphosphocytidyl-2-methyl-D-erythritol synthase, IspD                 |  |  |  |  |
| MSM1543 | hypothetical protein                                                    |  |  |  |  |
| MSM1544 | lipopolysaccharide cholinephosphotransferase                            |  |  |  |  |
| MSM1545 | glycosyltransferase, GT2 family                                         |  |  |  |  |
| MSM1546 | hypothetical protein                                                    |  |  |  |  |
| MSM1547 | phosphoribosylaminoimidazole-succinocarboxamide (SAICAR) synthase, PurC |  |  |  |  |
| MSM1548 | phosphoribosylformylglycinamidine (FGAM) synthase, PurS                 |  |  |  |  |
| MSM1549 | phosphoribosylformylglycinamidine (FGAM) synthase, PurQ                 |  |  |  |  |
| MSM1550 | uroporphyrin-III C-methyltransferase, CobA                              |  |  |  |  |
| MSM1551 | glucosamine-fructose-6-phosphate aminotransferase, GlmS                 |  |  |  |  |
| MSM1552 | hypothetical protein                                                    |  |  |  |  |
| MSM1553 | hypothetical protein                                                    |  |  |  |  |
| MSM1554 | putative adhesin-like protein                                           |  |  |  |  |
| MSM1555 | SAM-dependent methyltransferase                                         |  |  |  |  |
| MSM1556 | conserved hypothetical membrane protein                                 |  |  |  |  |
| MSM1557 | queuine/archaeosine tRNA-ribosyltransferase                             |  |  |  |  |
| MSM1558 | SAM-dependent methyltransferase, UbiE family                            |  |  |  |  |
| MSM1559 | polysaccharide biosynthesis protein, MviN-like family                   |  |  |  |  |
| MSM1560 | polysaccharide biosynthesis protein, MviN-like family                   |  |  |  |  |
| MSM1561 | 3-hydroxy-3-methylglutaryl-CoA (HMG-CoA) synthase                       |  |  |  |  |
| MSM1562 | acetyl-CoA acyltransferase, SCP-type thiolase family                    |  |  |  |  |
| MSM1563 | hypothetical protein                                                    |  |  |  |  |
| MSM1564 | predicted SAM-dependent methyltransferase                               |  |  |  |  |
| MSM1565 | cobyric acid synthase, CobQ                                             |  |  |  |  |
| MSM1566 | putative transposase                                                    |  |  |  |  |
| MSM1567 | adhesin-like protein                                                    |  |  |  |  |
| MSM1568 | putative transcription regulator                                        |  |  |  |  |
| MSM1569 | ATP-dependent protease La, LonB                                         |  |  |  |  |
| MSM1570 | cell wall biosynthesis protein, MurD-like peptide ligase family         |  |  |  |  |
| MSM1571 | hypothetical protein                                                    |  |  |  |  |
| MSM1572 | ADP-ribosylglycohydrolase                                               |  |  |  |  |
| MSM1573 | N-acetyltransferase, GNAT family                                        |  |  |  |  |
| MSM1574 | nitroreductase, NfnB                                                    |  |  |  |  |
| MSM1575 | hypothetical protein                                                    |  |  |  |  |
| MSM1576 | hypothetical protein                                                    |  |  |  |  |
| MSM1577 | ribose-phosphate pyrophosphokinase, PrsA                                |  |  |  |  |
| MSM1578 | hypothetical protein                                                    |  |  |  |  |
| MSM1579 | excinuclease ABC, subunit B, UvrB                                       |  |  |  |  |
| MSM1580 | hypothetical protein                                                    |  |  |  |  |
| MSM1581 | excinuclease ABC, subunit A, UvrA                                       |  |  |  |  |
| MSM1582 | conserved hypothetical membrane protein                                 |  |  |  |  |

|         |                                                                                               |  |  |    |  |  |
|---------|-----------------------------------------------------------------------------------------------|--|--|----|--|--|
| MSM1583 | archaea-specific helicase                                                                     |  |  |    |  |  |
| MSM1584 | predicted excinuclease ABC, C subunit, UvrC                                                   |  |  |    |  |  |
| MSM1585 | adhesin-like protein                                                                          |  |  |    |  |  |
| MSM1586 | adhesin-like protein                                                                          |  |  |    |  |  |
| MSM1587 | adhesin-like protein                                                                          |  |  |    |  |  |
| MSM1588 | transposase                                                                                   |  |  |    |  |  |
| MSM1589 | transposase, RNaseH-like family                                                               |  |  | ND |  |  |
| MSM1590 | adhesin-like protein                                                                          |  |  |    |  |  |
| MSM1591 | conserved hypothetical protein                                                                |  |  |    |  |  |
| MSM1592 | polysaccharide/polyol phosphate ABC transporter, ATPase component                             |  |  |    |  |  |
| MSM1593 | polysaccharide/polyol phosphate ABC transporter, permease component                           |  |  |    |  |  |
| MSM1594 | glycosyltransferase/CDP-glycerol:poly(glycerophosphate) glycerophosphotransferase, GT2 family |  |  |    |  |  |
| MSM1595 | SAM-dependent methyltransferase, FkbM family                                                  |  |  |    |  |  |
| MSM1596 | putative transposase                                                                          |  |  | ND |  |  |
| MSM1597 | hypothetical protein                                                                          |  |  |    |  |  |
| MSM1598 | SAM-dependent methyltransferase                                                               |  |  |    |  |  |
| MSM1599 | SAM-dependent methyltransferase                                                               |  |  |    |  |  |
| MSM1600 | putative acetyltransferase, trimeric LpxA-like family                                         |  |  |    |  |  |
| MSM1601 | conserved hypothetical protein                                                                |  |  |    |  |  |
| MSM1602 | glycosyltransferase/CDP-glycerol:poly(glycerophosphate) glycerophosphotransferase, GT2 family |  |  |    |  |  |
| MSM1603 | conserved hypothetical protein                                                                |  |  |    |  |  |
| MSM1604 | UDP-glucose pyrophosphorylase, GalU                                                           |  |  |    |  |  |
| MSM1605 | hypothetical protein                                                                          |  |  |    |  |  |
| MSM1606 | arylsulfatase regulator, AsIB                                                                 |  |  |    |  |  |
| MSM1607 | conserved hypothetical protein                                                                |  |  |    |  |  |
| MSM1608 | predicted oxidoreductase, aldo/keto reductase family                                          |  |  |    |  |  |
| MSM1609 | molybdate ABC transporter, substrate-binding component, ModA                                  |  |  |    |  |  |
| MSM1610 | molybdate ABC transporter, permease component, ModC                                           |  |  |    |  |  |
| MSM1611 | molybdate ABC transporter, ATPase component, ModB                                             |  |  |    |  |  |
| MSM1612 | predicted UDP-glucose 6-dehydrogenase                                                         |  |  |    |  |  |
| MSM1613 | predicted UDP-glucose/GDP-mannose dehydrogenase                                               |  |  |    |  |  |
| MSM1614 | predicted transcriptional regulator                                                           |  |  |    |  |  |
| MSM1615 | deoxyhypusine synthase, Dys                                                                   |  |  |    |  |  |
| MSM1616 | conserved hypothetical membrane protein                                                       |  |  |    |  |  |
| MSM1617 | orotidine-5'-phosphate decarboxylase, PyrF                                                    |  |  |    |  |  |
| MSM1618 | cobalamin biosynthesis protein M, CbiM                                                        |  |  |    |  |  |
| MSM1619 | cobalt ABC transporter, substrate-binding component, CbiN                                     |  |  |    |  |  |
| MSM1620 | cobalt ABC transporter, permease component, CbiQ                                              |  |  |    |  |  |
| MSM1621 | cobalt ABC transporter, ATPase component, CbiO                                                |  |  |    |  |  |
| MSM1622 | archaeal riboflavin synthase, RibC                                                            |  |  |    |  |  |
| MSM1623 | glycosyltransferase/dolichyl-phosphate mannose synthase, GT2 family                           |  |  |    |  |  |
| MSM1624 | conserved hypothetical protein                                                                |  |  |    |  |  |
| MSM1625 | thiol:fumarate reductase, subunit B, TfrB                                                     |  |  |    |  |  |
| MSM1626 | predicted fumarate reductase                                                                  |  |  |    |  |  |
| MSM1627 | glycosyltransferase, GT2 family                                                               |  |  |    |  |  |
| MSM1628 | conserved hypothetical protein, aldolase family                                               |  |  |    |  |  |
| MSM1629 | IMP dehydrogenase/GMP reductase, GuaB                                                         |  |  |    |  |  |
| MSM1630 | ribosomal protein L37Ae                                                                       |  |  |    |  |  |
| MSM1631 | predicted DNA-directed RNA polymerase II, subunit RPC10                                       |  |  |    |  |  |
| MSM1632 | predicted brix-domain ribosomal biogenesis protein                                            |  |  |    |  |  |
| MSM1633 | conserved hypothetical protein                                                                |  |  |    |  |  |
| MSM1634 | prefoldin, beta subunit                                                                       |  |  |    |  |  |
| MSM1635 | conserved hypothetical protein                                                                |  |  |    |  |  |
| MSM1636 | ProFAR isomerase-related protein                                                              |  |  |    |  |  |
| MSM1637 | conserved hypothetical membrane protein                                                       |  |  |    |  |  |
| MSM1638 | conserved hypothetical membrane protein                                                       |  |  |    |  |  |
| MSM1639 | heavy metal cation (Co/Zn/Cd) efflux system protein, CzcD family                              |  |  |    |  |  |
| MSM1640 | DNA integrase/recombinase, phage integrase family                                             |  |  |    |  |  |
| MSM1641 | hypothetical protein                                                                          |  |  |    |  |  |
| MSM1642 | conserved hypothetical protein                                                                |  |  |    |  |  |
| MSM1643 | hypothetical protein                                                                          |  |  |    |  |  |
| MSM1644 | hypothetical protein                                                                          |  |  |    |  |  |
| MSM1645 | virulence protein                                                                             |  |  |    |  |  |
| MSM1646 | putative ATPase (AAA+ superfamily)                                                            |  |  |    |  |  |
| MSM1647 | hypothetical protein                                                                          |  |  |    |  |  |
| MSM1648 | hypothetical protein                                                                          |  |  |    |  |  |
| MSM1649 | hypothetical protein                                                                          |  |  |    |  |  |
| MSM1650 | hypothetical protein                                                                          |  |  |    |  |  |
| MSM1651 | hypothetical protein                                                                          |  |  |    |  |  |
| MSM1652 | hypothetical protein                                                                          |  |  |    |  |  |
| MSM1653 | hypothetical protein                                                                          |  |  |    |  |  |

|         |                                                                           |  |  |  |  |
|---------|---------------------------------------------------------------------------|--|--|--|--|
| MSM1654 | putative Gp40-related protein, ERF family single-strand annealing protein |  |  |  |  |
| MSM1655 | hypothetical protein                                                      |  |  |  |  |
| MSM1656 | hypothetical protein                                                      |  |  |  |  |
| MSM1657 | conserved hypothetical protein                                            |  |  |  |  |
| MSM1658 | hypothetical protein                                                      |  |  |  |  |
| MSM1659 | hypothetical protein                                                      |  |  |  |  |
| MSM1660 | hypothetical protein                                                      |  |  |  |  |
| MSM1661 | hypothetical protein                                                      |  |  |  |  |
| MSM1662 | hypothetical protein                                                      |  |  |  |  |
| MSM1663 | hypothetical protein                                                      |  |  |  |  |
| MSM1664 | hypothetical protein                                                      |  |  |  |  |
| MSM1665 | hypothetical protein                                                      |  |  |  |  |
| MSM1666 | hypothetical protein                                                      |  |  |  |  |
| MSM1667 | hypothetical protein                                                      |  |  |  |  |
| MSM1668 | hypothetical protein                                                      |  |  |  |  |
| MSM1669 | hypothetical protein                                                      |  |  |  |  |
| MSM1670 | hypothetical protein                                                      |  |  |  |  |
| MSM1671 | large terminase subunit                                                   |  |  |  |  |
| MSM1672 | bacteriophage capsid portal protein                                       |  |  |  |  |
| MSM1673 | conserved hypothetical protein                                            |  |  |  |  |
| MSM1674 | hypothetical protein                                                      |  |  |  |  |
| MSM1675 | putative structural protein                                               |  |  |  |  |
| MSM1676 | hypothetical protein                                                      |  |  |  |  |
| MSM1677 | putative major capsid protein gp5                                         |  |  |  |  |
| MSM1678 | hypothetical protein                                                      |  |  |  |  |
| MSM1679 | hypothetical protein                                                      |  |  |  |  |
| MSM1680 | hypothetical protein                                                      |  |  |  |  |
| MSM1681 | hypothetical protein                                                      |  |  |  |  |
| MSM1682 | hypothetical protein                                                      |  |  |  |  |
| MSM1683 | hypothetical protein                                                      |  |  |  |  |
| MSM1684 | phage-related minor tail protein                                          |  |  |  |  |
| MSM1685 | hypothetical protein                                                      |  |  |  |  |
| MSM1686 | hypothetical protein                                                      |  |  |  |  |
| MSM1687 | conserved hypothetical protein                                            |  |  |  |  |
| MSM1688 | hypothetical protein                                                      |  |  |  |  |
| MSM1689 | putative collagen-like protein B                                          |  |  |  |  |
| MSM1690 | hypothetical protein                                                      |  |  |  |  |
| MSM1691 | putative pseudomurein endoisopeptidase, PeiW                              |  |  |  |  |
| MSM1692 | hypothetical protein                                                      |  |  |  |  |
| MSM1693 | predicted ribokinase, PfkB family                                         |  |  |  |  |
| MSM1694 | predicted helicase                                                        |  |  |  |  |
| MSM1695 | excinuclease ABC, subunit C, UvrC                                         |  |  |  |  |
| MSM1696 | conserved hypothetical protein                                            |  |  |  |  |
| MSM1697 | hypothetical protein                                                      |  |  |  |  |
| MSM1698 | methyl coenzyme M reductase system, component A2-like                     |  |  |  |  |
| MSM1699 | predicted universal stress protein, UspA                                  |  |  |  |  |
| MSM1700 | predicted ferredoxin                                                      |  |  |  |  |
| MSM1701 | predicted FAD-dependent dehydrogenase, geranylgeranyl reductase family    |  |  |  |  |
| MSM1702 | UDP-glucose 4-epimerase                                                   |  |  |  |  |
| MSM1703 | conserved hypothetical protein                                            |  |  |  |  |
| MSM1704 | glutamine phosphoribosylpyrophosphate amidotransferase, PurF              |  |  |  |  |
| MSM1705 | predicted collagenase, peptidase family U32                               |  |  |  |  |
| MSM1706 | CDP-diacylglycerol-glycerol-3-phosphate 3-phosphatidyltransferase         |  |  |  |  |
| MSM1707 | nitrogenase NifH subunit, NifH                                            |  |  |  |  |
| MSM1708 | hypothetical protein                                                      |  |  |  |  |
| MSM1709 | adhesin-like protein                                                      |  |  |  |  |
| MSM1710 | seryl-tRNA synthetase, SerS                                               |  |  |  |  |
| MSM1711 | conserved hypothetical protein                                            |  |  |  |  |
| MSM1712 | predicted ferritin                                                        |  |  |  |  |
| MSM1713 | predicted regulatory protein, amino acid-binding ACT domain family        |  |  |  |  |
| MSM1714 | coenzyme F390 synthetase                                                  |  |  |  |  |
| MSM1715 | magnesium chelatase subunit                                               |  |  |  |  |
| MSM1716 | adhesin-like protein                                                      |  |  |  |  |
| MSM1717 | predicted transporter                                                     |  |  |  |  |
| MSM1718 | predicted biopolymer transport protein                                    |  |  |  |  |
| MSM1719 | conserved hypothetical protein                                            |  |  |  |  |
| MSM1720 | DNA-directed RNA polymerase, subunit M, RpoM                              |  |  |  |  |
| MSM1721 | voltage gated chloride channel protein/cation transporter, TrkA family    |  |  |  |  |
| MSM1722 | nitroreductase                                                            |  |  |  |  |
| MSM1723 | N5,N10-methenyl-tetrahydromethanopterin cyclohydrolase, Mch               |  |  |  |  |
| MSM1724 | conserved hypothetical membrane protein                                   |  |  |  |  |
| MSM1725 | conserved hypothetical membrane protein                                   |  |  |  |  |
| MSM1726 | conserved hypothetical membrane protein                                   |  |  |  |  |
| MSM1727 | multimeric flavodoxin                                                     |  |  |  |  |



|         |                                                         |  |  |  |  |
|---------|---------------------------------------------------------|--|--|--|--|
| MSM1728 | hypothetical protein                                    |  |  |  |  |
| MSM1729 | conserved hypothetical protein                          |  |  |  |  |
| MSM1730 | conserved hypothetical membrane protein                 |  |  |  |  |
| MSM1731 | short chain dehydrogenase/reductase                     |  |  |  |  |
| MSM1732 | conserved hypothetical protein                          |  |  |  |  |
| MSM1733 | rubryerythrin                                           |  |  |  |  |
| MSM1734 | predicted thymidylate synthase, ThyA                    |  |  |  |  |
| MSM1735 | adhesin-like protein                                    |  |  |  |  |
| MSM1736 | permease, xanthine/uracil/vitamin C permease family     |  |  |  |  |
| MSM1737 | putative transcription regulator                        |  |  |  |  |
| MSM1738 | putative adhesin-like protein                           |  |  |  |  |
| MSM1739 | conserved hypothetical membrane protein                 |  |  |  |  |
| MSM1740 | O-linked GlcNAc transferase                             |  |  |  |  |
| MSM1741 | conserved hypothetical protein                          |  |  |  |  |
| MSM1742 | predicted integrase, phage integrase-like family        |  |  |  |  |
| MSM1743 | predicted type II restriction enzyme, methylase subunit |  |  |  |  |
| MSM1744 | predicted type II restriction enzyme, methylase subunit |  |  |  |  |
| MSM1745 | predicted type II restriction enzyme, methylase subunit |  |  |  |  |
| MSM1746 | predicted type II restriction enzyme, methylase subunit |  |  |  |  |
| MSM1747 | predicted type II restriction enzyme, methylase subunit |  |  |  |  |
| MSM1748 | predicted type II restriction enzyme, methylase subunit |  |  |  |  |
| MSM1749 | conserved hypothetical protein                          |  |  |  |  |
| MSM1750 | conserved hypothetical protein                          |  |  |  |  |
| MSM1751 | conserved hypothetical protein                          |  |  |  |  |
| MSM1752 | predicted restriction endonuclease                      |  |  |  |  |
| MSM1753 | conserved hypothetical protein                          |  |  |  |  |
| MSM1754 | predicted ATP-dependent protease La, Lon                |  |  |  |  |
| MSM1755 | purine/pyrimidine phosphoribosyl transferase            |  |  |  |  |
| MSM1756 | Smf protein                                             |  |  |  |  |
| MSM1757 | hypothetical protein                                    |  |  |  |  |
| MSM1758 | hypothetical protein                                    |  |  |  |  |
| MSM1759 | hypothetical protein                                    |  |  |  |  |
| MSM1760 | hypothetical protein                                    |  |  |  |  |
| MSM1761 | predicted ATPase involved in DNA repair                 |  |  |  |  |
| MSM1762 | hypothetical protein                                    |  |  |  |  |
| MSM1763 | predicted DNA-directed RNA polymerase, subunit M, RpoM  |  |  |  |  |
| MSM1764 | conserved hypothetical protein                          |  |  |  |  |
| MSM1765 | conserved hypothetical protein                          |  |  |  |  |
| MSM1766 | O-linked GlcNAc transferase                             |  |  |  |  |
| MSM1767 | hypothetical protein                                    |  |  |  |  |
| MSM1768 | hypothetical protein                                    |  |  |  |  |
| MSM1769 | conserved hypothetical membrane protein                 |  |  |  |  |
| MSM1770 | conserved hypothetical membrane protein                 |  |  |  |  |
| MSM1771 | DNA helicase, UvrD/REP helicase family                  |  |  |  |  |
| MSM1772 | conserved hypothetical protein                          |  |  |  |  |
| MSM1773 | conserved hypothetical protein                          |  |  |  |  |
| MSM1774 | hypothetical protein                                    |  |  |  |  |
| MSM1775 | putative topoisomerase IV, subunit A                    |  |  |  |  |
| MSM1776 | TPR repeat protein                                      |  |  |  |  |
| MSM1777 | putative transcription regulator                        |  |  |  |  |
| MSM1778 | conserved hypothetical protein                          |  |  |  |  |
| MSM1779 | conserved hypothetical protein                          |  |  |  |  |
| MSM1780 | conserved hypothetical membrane protein                 |  |  |  |  |
| MSM1781 | conserved hypothetical protein                          |  |  |  |  |
| MSM1782 | hypothetical protein                                    |  |  |  |  |
| MSM1783 | hypothetical protein                                    |  |  |  |  |
| MSM1784 | hypothetical protein                                    |  |  |  |  |
| MSM1785 | conserved hypothetical protein                          |  |  |  |  |
| MSM1786 | O-linked GlcNAc transferase                             |  |  |  |  |
| MSM1787 | O-linked GlcNAc transferase                             |  |  |  |  |
| MSM1788 | O-linked GlcNAc transferase                             |  |  |  |  |
| MSM1789 | predicted ATPase, AAA+ superfamily                      |  |  |  |  |
| MSM1790 | predicted ATPase, AAA+ superfamily                      |  |  |  |  |
| MSM1791 | conserved hypothetical protein                          |  |  |  |  |
| MSM1792 | nicotinate phosphoribosyltransferase                    |  |  |  |  |
| MSM1793 | conserved hypothetical protein                          |  |  |  |  |
| MSM1794 | predicted tubulin-like protein                          |  |  |  |  |
| MSM1795 | predicted ATPase, AAA+ superfamily                      |  |  |  |  |

<sup>1</sup>GeneChip-based genotyping of *M. smithii* strains done in duplicate; 'present' or 'absent' calls were determined using a perfect match/mismatch (PM/MM) model in dChip (see *Methods*). Note that the term 'absent' is based on different criteria than those used for the human microbiome dataset (see footnote 2).

<sup>2</sup>Metagenomic datasets from the microbiomes of two healthy lean adults (Gill et al., 2006) were tested for identity to *M. smithii* PS ORFs ; ORFs with reads that matched with >95% identity are called 'present', 80-95% identity are called 'divergent', and <80% identity are called 'absent'.

<sup>3</sup>Probeset for *M. smithii* gene not represented on GeneChip.
