# Supplementary material
Source: PubMed Central journal article supplement (PMC1965566)
Supplement: pnas_0704189104_21.pdf [file pnas_0704189104_21.pdf]

Table 9. Cluster of Orthologous Groups (COG) represented in the *M. smithii* proteome

A. Summary

| Number of<br><i>M. smithii</i><br>genes in<br>COG | Code | Functional Category                                           |
|---------------------------------------------------|------|---------------------------------------------------------------|
| 136                                               | J    | Translation                                                   |
| 60                                                | K    | Transcription                                                 |
| 78                                                | L    | Replication, Recombination and Repair                         |
| 3                                                 | B    | Chromatin Structure and Dynamics                              |
| 6                                                 | D    | Cell Cycle Control                                            |
| 26                                                | V    | Defense Mechanisms                                            |
| 8                                                 | T    | Signal Transduction Mechanisms                                |
| 59                                                | M    | Cell Wall/Membrane Biogenesis                                 |
| 3                                                 | N    | Cell Motility                                                 |
| 1                                                 | Z    | Cytoskeleton                                                  |
| 17                                                | U    | Intracellular Trafficking and Secretion                       |
| 41                                                | O    | Post-translational Modification, Protein Turnover, Chaperones |
| 121                                               | C    | Energy Production and Conversion                              |
| 30                                                | G    | Carbohydrate Transport and Metabolism                         |
| 82                                                | E    | Amino Acid Transport and Metabolism                           |
| 42                                                | F    | Nucleic Acid Transport and Metabolism                         |
| 92                                                | H    | Coenzyme Transport and Metabolism                             |
| 18                                                | I    | Lipid Transport and Metabolism                                |
| 57                                                | P    | Inorganic Ion Transport and Metabolism                        |
| 1                                                 | Q    | Secondary Metabolites Biosynthesis, Transport and Catabolism  |
| 201                                               | R    | General Function Prediction Only                              |
| 171                                               | S    | Function Unknown                                              |
| 491                                               | -    | Not in COGs                                                   |

B. *M. smithii* genes in each COG

| # in COG               | COG     | Description                                                                        | <i>M. smithii</i> gene(s) |
|------------------------|---------|------------------------------------------------------------------------------------|---------------------------|
| <b>Translation (J)</b> |         |                                                                                    |                           |
| 1                      | COG0008 | Glutamyl- and glutaminyl-tRNA synthetases                                          | MSM1452                   |
| 1                      | COG0009 | Putative translation factor (SUA5)                                                 | MSM0612                   |
| 1                      | COG0012 | Predicted GTPase, probable translation factor                                      | MSM1164                   |
| 1                      | COG0013 | Alanyl-tRNA synthetase                                                             | MSM0619                   |
| 1                      | COG0016 | Phenylalanyl-tRNA synthetase alpha subunit                                         | MSM1478                   |
| 1                      | COG0017 | Aspartyl/asparaginyl-tRNA synthetases                                              | MSM1236                   |
| 1                      | COG0018 | Arginyl-tRNA synthetase                                                            | MSM1231                   |
| 1                      | COG0023 | Translation initiation factor 1 (eIF-1/SUI1) and related proteins                  | MSM0754                   |
| 1                      | COG0024 | Methionine aminopeptidase                                                          | MSM1120                   |
| 1                      | COG0030 | Dimethyladenosine transferase (rRNA methylation)                                   | MSM1374                   |
| 1                      | COG0042 | tRNA-dihydrouridine synthase                                                       | MSM0972                   |
| 1                      | COG0048 | Ribosomal protein S12                                                              | MSM0901                   |
| 1                      | COG0049 | Ribosomal protein S7                                                               | MSM0900                   |
| 1                      | COG0051 | Ribosomal protein S10                                                              | MSM0897                   |
| 1                      | COG0060 | Isoleucyl-tRNA synthetase                                                          | MSM1341                   |
| 1                      | COG0064 | Asp-tRNAAsn/Glu-tRNA Gln amidotransferase B subunit (PET112 homolog)               | MSM1101                   |
| 1                      | COG0072 | Phenylalanyl-tRNA synthetase beta subunit                                          | MSM0277                   |
| 1                      | COG0080 | Ribosomal protein L11                                                              | MSM0623                   |
| 1                      | COG0081 | Ribosomal protein L1                                                               | MSM0622                   |
| 1                      | COG0087 | Ribosomal protein L3                                                               | MSM0762                   |
| 1                      | COG0088 | Ribosomal protein L4                                                               | MSM0761                   |
| 1                      | COG0089 | Ribosomal protein L23                                                              | MSM0760                   |
| 1                      | COG0090 | Ribosomal protein L2                                                               | MSM0759                   |
| 1                      | COG0091 | Ribosomal protein L22                                                              | MSM0757                   |
| 1                      | COG0092 | Ribosomal protein S3                                                               | MSM0756                   |
| 1                      | COG0093 | Ribosomal protein L14                                                              | MSM0751                   |
| 1                      | COG0094 | Ribosomal protein L5                                                               | MSM0748                   |
| 1                      | COG0096 | Ribosomal protein S8                                                               | MSM0746                   |
| 1                      | COG0097 | Ribosomal protein L6P/L9E                                                          | MSM0745                   |
| 1                      | COG0098 | Ribosomal protein S5                                                               | MSM0741                   |
| 1                      | COG0099 | Ribosomal protein S13                                                              | MSM1425                   |
| 1                      | COG0100 | Ribosomal protein S11                                                              | MSM1427                   |
| 1                      | COG0101 | Pseudouridylylase synthase                                                         | MSM0855                   |
| 1                      | COG0102 | Ribosomal protein L13                                                              | MSM1430                   |
| 1                      | COG0103 | Ribosomal protein S9                                                               | MSM1431                   |
| 1                      | COG0124 | Histidyl-tRNA synthetase                                                           | MSM1181                   |
| 1                      | COG0130 | Pseudouridine synthase                                                             | MSM0732                   |
| 1                      | COG0143 | Methionyl-tRNA synthetase                                                          | MSM0071                   |
| 1                      | COG0154 | Asp-tRNAAsn/Glu-tRNA Gln amidotransferase A subunit and related amidases           | MSM1253                   |
| 1                      | COG0162 | Tyrosyl-tRNA synthetase                                                            | MSM0513                   |
| 1                      | COG0172 | Seryl-tRNA synthetase                                                              | MSM1710                   |
| 1                      | COG0180 | Tryptophanyl-tRNA synthetase                                                       | MSM0216                   |
| 1                      | COG0182 | Predicted translation initiation factor 2B subunit, eIF-2B alpha/beta/delta family | MSM0804                   |
| 1                      | COG0184 | Ribosomal protein S15P/S13E                                                        | MSM1194                   |
| 1                      | COG0185 | Ribosomal protein S19                                                              | MSM0758                   |
| 1                      | COG0186 | Ribosomal protein S17                                                              | MSM0752                   |
| 1                      | COG0197 | Ribosomal protein L16/L10E                                                         | MSM0989                   |
| 1                      | COG0198 | Ribosomal protein L24                                                              | MSM0750                   |
| 1                      | COG0199 | Ribosomal protein S14                                                              | MSM0747                   |
| 1                      | COG0200 | Ribosomal protein L15                                                              | MSM0739                   |
| 1                      | COG0215 | Cysteinylyl-tRNA synthetase                                                        | MSM0268                   |
| 1                      | COG0231 | Translation elongation factor P (EF-P)/translation initiation factor 5A (eIF-5A)   | MSM0877                   |
| 1                      | COG0244 | Ribosomal protein L10                                                              | MSM0621                   |
| 1                      | COG0255 | Ribosomal protein L29                                                              | MSM0755                   |
| 1                      | COG0256 | Ribosomal protein L18                                                              | MSM0742                   |
| 1                      | COG0293 | 23S rRNA methylase                                                                 | MSM0508                   |
| 1                      | COG0343 | Queuine/archaeosine tRNA-ribosyltransferase                                        | MSM1557                   |
| 1                      | COG0423 | Glycyl-tRNA synthetase (class II)                                                  | MSM0403                   |
| 1                      | COG0441 | Threonyl-tRNA synthetase                                                           | MSM1214                   |
| 1                      | COG0442 | Prolyl-tRNA synthetase                                                             | MSM0287                   |
| 1                      | COG0480 | Translation elongation factors (GTPases)                                           | MSM0899                   |
| 1                      | COG0495 | Leucyl-tRNA synthetase                                                             | MSM1172                   |
| 1                      | COG0522 | Ribosomal protein S4 and related proteins                                          | MSM1426                   |
| 1                      | COG0525 | Valyl-tRNA synthetase                                                              | MSM0275                   |
| 1                      | COG0532 | Translation initiation factor 2 (IF-2; GTPase)                                     | MSM0202                   |
| 1                      | COG0565 | rRNA methylase                                                                     | MSM0394                   |
| 1                      | COG0621 | 2-methylthioadenine synthetase                                                     | MSM0845                   |
| 1                      | COG0689 | RNase PH                                                                           | MSM0242                   |
| 1                      | COG1093 | Translation initiation factor 2, alpha subunit (eIF-2alpha)                        | MSM1133                   |

|                          |         |                                                                                                                      |                  |
|--------------------------|---------|----------------------------------------------------------------------------------------------------------------------|------------------|
| 1                        | COG1096 | Predicted RNA-binding protein (consists of S1 domain and a Zn-ribbon domain)                                         | MSM1357          |
| 1                        | COG1097 | RNA-binding protein Rrp4 and related proteins (contain S1 domain and KH domain)                                      | MSM0243          |
| 1                        | COG1258 | Predicted pseudouridylate synthase                                                                                   | MSM1361          |
| 1                        | COG1325 | Predicted exosome subunit                                                                                            | MSM0297          |
| 1                        | COG1358 | Ribosomal protein HS6-type (S12/L30/L7a)                                                                             | MSM0206          |
| 1                        | COG1369 | RNase P/RNase MRP subunit POP5                                                                                       | MSM0246          |
| 1                        | COG1383 | Ribosomal protein S17E                                                                                               | MSM0833          |
| 1                        | COG1384 | Lysyl-tRNA synthetase (class I)                                                                                      | MSM1387          |
| 1                        | COG1471 | Ribosomal protein S4E                                                                                                | MSM0749          |
| 1                        | COG1491 | Predicted RNA-binding protein                                                                                        | MSM1375          |
| 1                        | COG1498 | Protein implicated in ribosomal biogenesis, Nop56p homolog                                                           | MSM1046          |
| 1                        | COG1500 | Predicted exosome subunit                                                                                            | MSM0244          |
| 1                        | COG1503 | Peptide chain release factor 1 (eRF1)                                                                                | MSM0891          |
| 1                        | COG1514 | 2'-5' RNA ligase                                                                                                     | MSM0054          |
| 1                        | COG1534 | Predicted RNA-binding protein containing KH domain, possibly ribosomal protein                                       | MSM0710          |
| 2                        | COG1549 | Queueine tRNA-ribosyltransferases, contain PUA domain                                                                | MSM0633, MSM0797 |
| 1                        | COG1552 | Ribosomal protein L40E                                                                                               | MSM0125          |
| 1                        | COG1588 | RNase P/RNase MRP subunit p29                                                                                        | MSM0753          |
| 1                        | COG1601 | Translation initiation factor 2, beta subunit (eIF-2beta)/eIF-5 N-terminal domain                                    | MSM0511          |
| 1                        | COG1603 | RNase P/RNase MRP subunit p30                                                                                        | MSM0247          |
| 1                        | COG1631 | Ribosomal protein L44E                                                                                               | MSM1135          |
| 1                        | COG1632 | Ribosomal protein L15E                                                                                               | MSM0298          |
| 1                        | COG1670 | Acetyltransferases, including N-acetylases of ribosomal proteins                                                     | MSM1573          |
| 1                        | COG1676 | tRNA splicing endonuclease                                                                                           | MSM0217          |
| 1                        | COG1717 | Ribosomal protein L32E                                                                                               | MSM0744          |
| 1                        | COG1727 | Ribosomal protein L18E                                                                                               | MSM1429          |
| 1                        | COG1736 | Diphthamide synthase subunit DPH2                                                                                    | MSM1358          |
| 1                        | COG1746 | tRNA nucleotidyltransferase (CCA-adding enzyme)                                                                      | MSM0053          |
| 1                        | COG1798 | Diphthamide biosynthesis methyltransferase                                                                           | MSM0801          |
| 1                        | COG1841 | Ribosomal protein L30/L7E                                                                                            | MSM0740          |
| 1                        | COG1867 | N2,N2-dimethylguanosine tRNA methyltransferase                                                                       | MSM1031          |
| 1                        | COG1889 | Fibrillarin-like rRNA methylase                                                                                      | MSM1047          |
| 1                        | COG1890 | Ribosomal protein S3AE                                                                                               | MSM0661          |
| 1                        | COG1911 | Ribosomal protein L30E                                                                                               | MSM0907          |
| 1                        | COG1976 | Translation initiation factor 6 (eIF-6)                                                                              | MSM0704          |
| 1                        | COG1997 | Ribosomal protein L37AE/L43A                                                                                         | MSM1630          |
| 1                        | COG1998 | Ribosomal protein S27AE                                                                                              | MSM0193          |
| 1                        | COG2004 | Ribosomal protein S24E                                                                                               | MSM0194          |
| 1                        | COG2007 | Ribosomal protein S8E                                                                                                | MSM1486          |
| 1                        | COG2016 | Predicted RNA-binding protein (contains PUA domain)                                                                  | MSM0183          |
| 1                        | COG2023 | RNase P subunit RPR2                                                                                                 | MSM0711          |
| 1                        | COG2051 | Ribosomal protein S27E                                                                                               | MSM1134          |
| 1                        | COG2053 | Ribosomal protein S28E/S33                                                                                           | MSM0205          |
| 1                        | COG2075 | Ribosomal protein L24E                                                                                               | MSM0204          |
| 1                        | COG2092 | Translation elongation factor EF-1beta                                                                               | MSM0602          |
| 1                        | COG2097 | Ribosomal protein L31E                                                                                               | MSM0705          |
| 1                        | COG2117 | Predicted subunit of tRNA(5-methylaminomethyl-2-thiouridylate) methyltransferase, contains the PP-loop ATPase domain | MSM0707          |
| 1                        | COG2123 | RNase PH-related exoribonuclease                                                                                     | MSM0241          |
| 1                        | COG2125 | Ribosomal protein S6E (S10)                                                                                          | MSM0201          |
| 1                        | COG2126 | Ribosomal protein L37E                                                                                               | MSM0181          |
| 1                        | COG2139 | Ribosomal protein L21E                                                                                               | MSM1377          |
| 1                        | COG2147 | Ribosomal protein L19E                                                                                               | MSM0743          |
| 1                        | COG2157 | Ribosomal protein L20A (L18A)                                                                                        | MSM0703          |
| 1                        | COG2163 | Ribosomal protein L14E/L6E/L27E                                                                                      | MSM0733          |
| 1                        | COG2167 | Ribosomal protein L39E                                                                                               | MSM0706          |
| 1                        | COG2174 | Ribosomal protein L34E                                                                                               | MSM0735          |
| 1                        | COG2238 | Ribosomal protein S19E (S16A)                                                                                        | MSM0709          |
| 1                        | COG2260 | Predicted Zn-ribbon RNA-binding protein                                                                              | MSM1132          |
| 1                        | COG2263 | Predicted RNA methylase                                                                                              | MSM0764          |
| 1                        | COG2511 | Archaeal Glu-tRNA <sup>Gln</sup> amidotransferase subunit E (contains GAD domain)                                    | MSM0335          |
| 1                        | COG2519 | tRNA(1-methyladenosine) methyltransferase and related methyltransferases                                             | MSM1173          |
| 1                        | COG2888 | Predicted Zn-ribbon RNA-binding protein with a function in translation                                               | MSM0603          |
| 1                        | COG2890 | Methylase of polypeptide chain release factors                                                                       | MSM1373          |
| 1                        | COG3277 | RNA-binding protein involved in rRNA processing                                                                      | MSM0425          |
| 1                        | COG5256 | Translation elongation factor EF-1alpha (GTPase)                                                                     | MSM0898          |
| 1                        | COG5257 | Translation initiation factor 2, gamma subunit (eIF-2gamma; GTPase)                                                  | MSM0200          |
| <b>Transcription (K)</b> |         |                                                                                                                      |                  |
| 2                        | COG0085 | DNA-directed RNA polymerase, beta subunit/140 kD subunit                                                             | MSM0910, MSM0911 |
| 2                        | COG0086 | DNA-directed RNA polymerase, beta' subunit/160 kD subunit                                                            | MSM0908, MSM0909 |
| 1                        | COG0195 | Transcription elongation factor                                                                                      | MSM0906          |
| 1                        | COG0202 | DNA-directed RNA polymerase, alpha subunit/40 kD subunit                                                             | MSM1428          |

|                                                  |         |                                                                                                                                       |                                             |
|--------------------------------------------------|---------|---------------------------------------------------------------------------------------------------------------------------------------|---------------------------------------------|
| 1                                                | COG0250 | Transcription antiterminator                                                                                                          | MSM0624                                     |
| 1                                                | COG0571 | dsRNA-specific ribonuclease                                                                                                           | MSM0176                                     |
| 1                                                | COG0583 | Transcriptional regulator                                                                                                             | MSM1390                                     |
| 3                                                | COG0640 | Predicted transcriptional regulators                                                                                                  | MSM0819, MSM1126, MSM1350                   |
| 1                                                | COG0789 | Predicted transcriptional regulators                                                                                                  | MSM0949                                     |
| 1                                                | COG0846 | NAD-dependent protein deacetylases, SIR2 family                                                                                       | MSM1087                                     |
| 1                                                | COG0864 | Predicted transcriptional regulators containing the CopG/Arc/MetJ DNA-binding domain and a metal-binding domain                       | MSM0364                                     |
| 1                                                | COG1095 | DNA-directed RNA polymerase, subunit E'                                                                                               | MSM0197                                     |
| 1                                                | COG1293 | Predicted RNA-binding protein homologous to eukaryotic snRNP                                                                          | MSM0778                                     |
| 1                                                | COG1308 | Transcription factor homologous to NACalpha-BTF3                                                                                      | MSM0384                                     |
| 2                                                | COG1309 | Transcriptional regulator                                                                                                             | MSM0094, MSM0650                            |
| 1                                                | COG1321 | Mn-dependent transcriptional regulator                                                                                                | MSM0218                                     |
| 1                                                | COG1378 | Predicted transcriptional regulators                                                                                                  | MSM1445                                     |
| 1                                                | COG1395 | Predicted transcriptional regulator                                                                                                   | MSM0453                                     |
| 3                                                | COG1396 | Predicted transcriptional regulators                                                                                                  | MSM0026, MSM0329, MSM1528                   |
| 1                                                | COG1405 | Transcription initiation factor TFIIB, Brf1 subunit/Transcription initiation factor TFIIB                                             | MSM0424                                     |
| 1                                                | COG1476 | Predicted transcriptional regulators                                                                                                  | MSM1150                                     |
| 1                                                | COG1497 | Predicted transcriptional regulator                                                                                                   | MSM1499                                     |
| 1                                                | COG1522 | Transcriptional regulators                                                                                                            | MSM1032                                     |
| 1                                                | COG1581 | Archaeal DNA-binding protein                                                                                                          | MSM1245                                     |
| 3                                                | COG1594 | DNA-directed RNA polymerase, subunit M/Transcription elongation factor TFIIS                                                          | MSM1354, MSM1720, MSM1763                   |
| 1                                                | COG1644 | DNA-directed RNA polymerase, subunit N (RpoN/RPB10)                                                                                   | MSM1432                                     |
| 1                                                | COG1675 | Transcription initiation factor IIE, alpha subunit                                                                                    | MSM0631                                     |
| 1                                                | COG1695 | Predicted transcriptional regulators                                                                                                  | MSM1250                                     |
| 1                                                | COG1733 | Predicted transcriptional regulators                                                                                                  | MSM0864                                     |
| 1                                                | COG1758 | DNA-directed RNA polymerase, subunit K/omega                                                                                          | MSM1433                                     |
| 1                                                | COG1761 | DNA-directed RNA polymerase, subunit L                                                                                                | MSM1356                                     |
| 1                                                | COG1777 | Predicted transcriptional regulators                                                                                                  | MSM1107                                     |
| 1                                                | COG1813 | Predicted transcription factor, homolog of eukaryotic MBF1                                                                            | MSM0355                                     |
| 3                                                | COG1846 | Transcriptional regulators                                                                                                            | MSM0413, MSM0600, MSM1230                   |
| 2                                                | COG1958 | Small nuclear ribonucleoprotein (snRNP) homolog                                                                                       | MSM0182, MSM1220                            |
| 1                                                | COG1996 | DNA-directed RNA polymerase, subunit RPC10 (contains C4-type Zn-finger)                                                               | MSM1631                                     |
| 1                                                | COG2012 | DNA-directed RNA polymerase, subunit H, RpoH/RPB5                                                                                     | MSM0912                                     |
| 1                                                | COG2093 | DNA-directed RNA polymerase, subunit E''                                                                                              | MSM0196                                     |
| 1                                                | COG2101 | TATA-box binding protein (TBP), component of TFIID and TFIIB                                                                          | MSM0720                                     |
| 1                                                | COG2183 | Transcriptional accessory protein                                                                                                     | MSM1292                                     |
| 1                                                | COG2207 | AraC-type DNA-binding domain-containing proteins                                                                                      | MSM0775                                     |
| 1                                                | COG2524 | Predicted transcriptional regulator, contains C-terminal CBS domains                                                                  | MSM1614                                     |
| 2                                                | COG2865 | Predicted transcriptional regulator containing an HTH domain and an uncharacterized domain shared with the mammalian protein Schlafen | MSM0540, MSM1315                            |
| 1                                                | COG4008 | Predicted metal-binding transcription factor                                                                                          | MSM0969                                     |
| 3                                                | COG4742 | Predicted transcriptional regulator                                                                                                   | MSM0404, MSM0817, MSM0818                   |
| <b>Replication, Recombination and Repair (L)</b> |         |                                                                                                                                       |                                             |
| 2                                                | COG0084 | Mg-dependent DNase                                                                                                                    | MSM0097, MSM0416                            |
| 1                                                | COG0122 | 3-methyladenine DNA glycosylase/8-oxoguanine DNA glycosylase                                                                          | MSM1365                                     |
| 1                                                | COG0164 | Ribonuclease HII                                                                                                                      | MSM0979                                     |
| 2                                                | COG0177 | Predicted EndoIII-related endonuclease                                                                                                | MSM0272, MSM1584                            |
| 1                                                | COG0178 | Excinuclease ATPase subunit                                                                                                           | MSM1581                                     |
| 2                                                | COG0188 | Type IIA topoisomerase (DNA gyrase/topo II, topoisomerase IV), A subunit                                                              | MSM1353, MSM1775                            |
| 5                                                | COG0210 | Superfamily I DNA and RNA helicases                                                                                                   | MSM0058, MSM0113, MSM0731, MSM1420, MSM1771 |
| 1                                                | COG0258 | 5'-3' exonuclease (including N-terminal domain of PolI)                                                                               | MSM0725                                     |
| 1                                                | COG0270 | Site-specific DNA methylase                                                                                                           | MSM0531                                     |
| 1                                                | COG0322 | Nuclease subunit of the excinuclease complex                                                                                          | MSM1695                                     |
| 1                                                | COG0350 | Methylated DNA-protein cysteine methyltransferase                                                                                     | MSM1185                                     |
| 1                                                | COG0358 | DNA primase (bacterial type)                                                                                                          | MSM0427                                     |
| 2                                                | COG0417 | DNA polymerase elongation subunit (family B)                                                                                          | MSM1041, MSM1481                            |
| 3                                                | COG0419 | ATPase involved in DNA repair                                                                                                         | MSM0120, MSM0693, MSM1761                   |
| 1                                                | COG0420 | DNA repair exonuclease                                                                                                                | MSM0121                                     |
| 2                                                | COG0468 | RecA/RadA recombinase                                                                                                                 | MSM0611, MSM1333                            |
| 2                                                | COG0470 | ATPase involved in DNA replication                                                                                                    | MSM1176, MSM1177                            |
| 1                                                | COG0550 | Topoisomerase IA                                                                                                                      | MSM0717                                     |
| 1                                                | COG0556 | Helicase subunit of the DNA excision repair complex                                                                                   | MSM1579                                     |
| 3                                                | COG0582 | Integrase                                                                                                                             | MSM0428, MSM1640, MSM1742                   |
| 1                                                | COG0592 | DNA polymerase sliding clamp subunit (PCNA homolog)                                                                                   | MSM1137                                     |
| 2                                                | COG0608 | Single-stranded DNA-specific exonuclease                                                                                              | MSM1193, MSM1500                            |
| 1                                                | COG0648 | Endonuclease IV                                                                                                                       | MSM0963                                     |
| 1                                                | COG0708 | Exonuclease III                                                                                                                       | MSM1479                                     |
| 1                                                | COG1041 | Predicted DNA modification methylase                                                                                                  | MSM0352                                     |
| 1                                                | COG1107 | Archaea-specific RecJ-like exonuclease, contains DnaJ-type Zn finger domain                                                           | MSM0260                                     |
| 1                                                | COG1111 | ERCC4-like helicases                                                                                                                  | MSM1187                                     |

|                                             |         |                                                                                                                   |                                                                                                                              |
|---------------------------------------------|---------|-------------------------------------------------------------------------------------------------------------------|------------------------------------------------------------------------------------------------------------------------------|
| 2                                           | COG1112 | Superfamily I DNA and RNA helicases and helicase subunits                                                         | MSM1081, MSM1694                                                                                                             |
| 1                                           | COG1193 | Mismatch repair ATPase (MutS family)                                                                              | MSM0524                                                                                                                      |
| 1                                           | COG1241 | Predicted ATPase involved in replication control, Cdc46/Mcm family                                                | MSM0510                                                                                                                      |
| 1                                           | COG1311 | Archaeal DNA polymerase II, small subunit/DNA polymerase delta, subunit B                                         | MSM1271                                                                                                                      |
| 1                                           | COG1343 | Uncharacterized protein predicted to be involved in DNA repair                                                    | MSM0163                                                                                                                      |
| 1                                           | COG1389 | DNA topoisomerase VI, subunit B                                                                                   | MSM0955                                                                                                                      |
| 2                                           | COG1468 | RecB family exonuclease                                                                                           | MSM0165, MSM1059                                                                                                             |
| 2                                           | COG1518 | Uncharacterized protein predicted to be involved in DNA repair                                                    | MSM0023, MSM0164                                                                                                             |
| 1                                           | COG1525 | Micrococcal nuclease (thermonuclease) homologs                                                                    | MSM1495                                                                                                                      |
| 1                                           | COG1533 | DNA repair photolyase                                                                                             | MSM0543                                                                                                                      |
| 1                                           | COG1570 | Exonuclease VII, large subunit                                                                                    | MSM0001                                                                                                                      |
| 1                                           | COG1583 | Uncharacterized protein predicted to be involved in DNA repair (RAMP superfamily)                                 | MSM0170                                                                                                                      |
| 1                                           | COG1591 | Holliday junction resolvase - archaeal type                                                                       | MSM1098                                                                                                                      |
| 1                                           | COG1599 | Single-stranded DNA-binding replication protein A (RPA), large (70 kD) subunit and related ssDNA-binding proteins | MSM1332                                                                                                                      |
| 1                                           | COG1637 | Predicted nuclease of the RecB family                                                                             | MSM0497                                                                                                                      |
| 1                                           | COG1688 | Uncharacterized protein predicted to be involved in DNA repair (RAMP superfamily)                                 | MSM0167                                                                                                                      |
| 1                                           | COG1697 | DNA topoisomerase VI, subunit A                                                                                   | MSM0956                                                                                                                      |
| 1                                           | COG1793 | ATP-dependent DNA ligase                                                                                          | MSM0645                                                                                                                      |
| 1                                           | COG1857 | Uncharacterized protein predicted to be involved in DNA repair                                                    | MSM0168                                                                                                                      |
| 1                                           | COG1933 | Archaeal DNA polymerase II, large subunit                                                                         | MSM1384                                                                                                                      |
| 1                                           | COG2219 | Eukaryotic-type DNA primase, large subunit                                                                        | MSM0073                                                                                                                      |
| 1                                           | COG2231 | Uncharacterized protein related to Endonuclease III                                                               | MSM1475                                                                                                                      |
| 2                                           | COG3335 | Transposase and inactivated derivatives                                                                           | MSM0460, MSM1589                                                                                                             |
| 1                                           | COG3359 | Predicted exonuclease                                                                                             | MSM0138                                                                                                                      |
| 2                                           | COG3415 | Transposase and inactivated derivatives                                                                           | MSM0458, MSM1588                                                                                                             |
| 5                                           | COG3464 | Transposase and inactivated derivatives                                                                           | MSM0087, MSM0230, MSM0396, MSM1093, MSM1566                                                                                  |
| 1                                           | COG3666 | Transposase and inactivated derivatives                                                                           | MSM1523                                                                                                                      |
| <b>Chromatin Structure and Dynamics (B)</b> |         |                                                                                                                   |                                                                                                                              |
| 3                                           | COG2036 | Histones H3 and H4                                                                                                | MSM0213, MSM0844, MSM1260                                                                                                    |
| <b>Cell Cycle Control (D)</b>               |         |                                                                                                                   |                                                                                                                              |
| 3                                           | COG0037 | Predicted ATPase of the PP-loop superfamily implicated in cell cycle control                                      | MSM0553, MSM1028, MSM1178                                                                                                    |
| 1                                           | COG0489 | ATPases involved in chromosome partitioning                                                                       | MSM0045                                                                                                                      |
| 1                                           | COG1077 | Actin-like ATPase involved in cell morphogenesis                                                                  | MSM0980                                                                                                                      |
| 1                                           | COG1192 | ATPases involved in chromosome partitioning                                                                       | MSM1241                                                                                                                      |
| <b>Defense Mechanisms (V)</b>               |         |                                                                                                                   |                                                                                                                              |
| 5                                           | COG0534 | Na <sup>+</sup> -driven multidrug efflux pump                                                                     | MSM0152, MSM0252, MSM0414, MSM1228, MSM1229                                                                                  |
| 2                                           | COG0577 | ABC-type antimicrobial peptide transport system, permease component                                               | MSM0856, MSM1400                                                                                                             |
| 2                                           | COG0732 | Restriction endonuclease S subunits                                                                               | MSM0157, MSM0158                                                                                                             |
| 2                                           | COG0842 | ABC-type multidrug transport system, permease component                                                           | MSM1248, MSM1484                                                                                                             |
| 6                                           | COG1002 | Type II restriction enzyme, methylase subunits                                                                    | MSM1743, MSM1744, MSM1745, MSM1746, MSM1747, MSM1748                                                                         |
| 3                                           | COG1131 | ABC-type multidrug transport system, ATPase component                                                             | MSM0593, MSM1249, MSM1483                                                                                                    |
| 2                                           | COG1132 | ABC-type multidrug transport system, ATPase and permease components                                               | MSM0773, MSM0774                                                                                                             |
| 1                                           | COG1136 | ABC-type antimicrobial peptide transport system, ATPase component                                                 | MSM0857                                                                                                                      |
| 1                                           | COG1715 | Restriction endonuclease                                                                                          | MSM1752                                                                                                                      |
| 1                                           | COG1968 | Uncharacterized bacitracin resistance protein                                                                     | MSM1201                                                                                                                      |
| 1                                           | COG4845 | Chloramphenicol O-acetyltransferase                                                                               | MSM0047                                                                                                                      |
| <b>Signal Transduction Mechanisms (T)</b>   |         |                                                                                                                   |                                                                                                                              |
| 3                                           | COG0589 | Universal stress protein UspA and related nucleotide-binding proteins                                             | MSM0485, MSM0887, MSM1699                                                                                                    |
| 5                                           | COG3448 | CBS-domain-containing membrane protein                                                                            | MSM0305, MSM0484, MSM0790, MSM1053, MSM1054                                                                                  |
| <b>Cell Wall/Membrane Biogenesis (M)</b>    |         |                                                                                                                   |                                                                                                                              |
| 1                                           | COG0381 | UDP-N-acetylglucosamine 2-epimerase                                                                               | MSM0853                                                                                                                      |
| 3                                           | COG0399 | Predicted pyridoxal phosphate-dependent enzyme apparently involved in regulation of cell wall biogenesis          | MSM0347, MSM1030, MSM1536                                                                                                    |
| 4                                           | COG0438 | Glycosyltransferase                                                                                               | MSM0836, MSM1313, MSM1317, MSM1322                                                                                           |
| 1                                           | COG0449 | Glucosamine 6-phosphate synthetase, contains amidotransferase and phosphosugar isomerase domains                  | MSM1551                                                                                                                      |
| 14                                          | COG0463 | Glycosyltransferases involved in cell wall biogenesis                                                             | MSM0423, MSM1290, MSM1294, MSM1297, MSM1310, MSM1311, MSM1312, MSM1316, MSM1323, MSM1324, MSM1328, MSM1545, MSM1623, MSM1627 |
| 2                                           | COG0472 | UDP-N-acetylmuramyl pentapeptide phosphotransferase/UDP-N-acetylglucosamine-1-phosphate transferase               | MSM0066, MSM0360                                                                                                             |
| 1                                           | COG0562 | UDP-galactopyranose mutase                                                                                        | MSM1502                                                                                                                      |
| 1                                           | COG0668 | Small-conductance mechanosensitive channel                                                                        | MSM0493                                                                                                                      |
| 1                                           | COG0677 | UDP-N-acetyl-D-mannosaminuronate dehydrogenase                                                                    | MSM1303                                                                                                                      |

|                                                                          |         |                                                                                                            |                           |
|--------------------------------------------------------------------------|---------|------------------------------------------------------------------------------------------------------------|---------------------------|
| 1                                                                        | COG0707 | pfam match to MurG; not predicted to be a carbohydrate active enzyme by CAZy                               | MSM0638                   |
| 1                                                                        | COG0750 | Predicted membrane-associated Zn-dependent proteases 1                                                     | MSM1344                   |
| 3                                                                        | COG0769 | UDP-N-acetylmuramyl tripeptide synthase                                                                    | MSM0359, MSM1139, MSM1570 |
| 1                                                                        | COG0770 | UDP-N-acetylmuramyl pentapeptide synthase                                                                  | MSM0880                   |
| 1                                                                        | COG0771 | UDP-N-acetylmuramoylalanine-D-glutamate ligase                                                             | MSM0118                   |
| 1                                                                        | COG0773 | UDP-N-acetylmuramate-alanine ligase                                                                        | MSM1190                   |
| 1                                                                        | COG0794 | Predicted sugar phosphate isomerase involved in capsule formation                                          | MSM1391                   |
| 1                                                                        | COG1004 | Predicted UDP-glucose 6-dehydrogenase                                                                      | MSM1612                   |
| 1                                                                        | COG1083 | CMP-N-acetylneuraminic acid synthetase                                                                     | MSM0944                   |
| 1                                                                        | COG1087 | UDP-glucose 4-epimerase                                                                                    | MSM1702                   |
| 1                                                                        | COG1088 | dTDP-D-glucose 4,6-dehydratase                                                                             | MSM1309                   |
| 1                                                                        | COG1091 | dTDP-4-dehydrorhamnose reductase                                                                           | MSM1304                   |
| 1                                                                        | COG1209 | dTDP-glucose pyrophosphorylase                                                                             | MSM1307                   |
| 1                                                                        | COG1210 | UDP-glucose pyrophosphorylase                                                                              | MSM1604                   |
| 1                                                                        | COG1861 | Spore coat polysaccharide biosynthesis protein F, CMP-KDO synthetase homolog                               | MSM1537                   |
| 1                                                                        | COG1887 | Putative glycosyl/glycerophosphate transferases involved in teichoic acid biosynthesis TagF/TagB/EpsJ/RodC | MSM1327                   |
| 1                                                                        | COG1898 | dTDP-4-dehydrorhamnose 3,5-epimerase and related enzymes                                                   | MSM1308                   |
| 1                                                                        | COG2089 | Sialic acid synthase                                                                                       | MSM1539                   |
| 1                                                                        | COG2148 | Sugar transferases involved in lipopolysaccharide synthesis                                                | MSM1331                   |
| 1                                                                        | COG2222 | Predicted phosphosugar isomerases                                                                          | MSM0872                   |
| 2                                                                        | COG2230 | Cyclopropane fatty acid synthase and related methyltransferases                                            | MSM0274, MSM0490          |
| 1                                                                        | COG2843 | Putative enzyme of poly-gamma-glutamate biosynthesis (capsule formation)                                   | MSM0700                   |
| 1                                                                        | COG3049 | Penicillin V acylase and related amidases                                                                  | MSM0986                   |
| 3                                                                        | COG3475 | LPS biosynthesis protein                                                                                   | MSM1512, MSM1515, MSM1544 |
| 1                                                                        | COG3764 | Sortase (surface protein transpeptidase)                                                                   | MSM0984                   |
| 1                                                                        | COG3980 | Spore coat polysaccharide biosynthesis protein, predicted glycosyltransferase                              | MSM1538                   |
| <b>Cell Motility (N)</b>                                                 |         |                                                                                                            |                           |
| 1                                                                        | COG3351 | Putative archaeal flagellar protein D/E                                                                    | MSM0137                   |
| 2                                                                        | COG5651 | PPE-repeat proteins                                                                                        | MSM1586, MSM1590          |
| <b>Cytoskeleton (Z)</b>                                                  |         |                                                                                                            |                           |
| 1                                                                        | COG5023 | Tubulin                                                                                                    | MSM1794                   |
| <b>Intracellular Trafficking and Secretion (U)</b>                       |         |                                                                                                            |                           |
| 1                                                                        | COG0201 | Preprotein translocase subunit SecY                                                                        | MSM0738                   |
| 1                                                                        | COG0541 | Signal recognition particle GTPase                                                                         | MSM1360                   |
| 1                                                                        | COG0552 | Signal recognition particle GTPase                                                                         | MSM0701                   |
| 2                                                                        | COG0681 | Signal peptidase I                                                                                         | MSM0232, MSM1232          |
| 3                                                                        | COG0811 | Biopolymer transport proteins                                                                              | MSM0978, MSM1401, MSM1718 |
| 1                                                                        | COG0848 | Biopolymer transport protein                                                                               | MSM0977                   |
| 1                                                                        | COG1400 | Signal recognition particle 19 kDa protein                                                                 | MSM1501                   |
| 1                                                                        | COG2443 | Preprotein translocase subunit Sss1                                                                        | MSM0625                   |
| 2                                                                        | COG3210 | Large exoproteins involved in heme utilization or adhesion                                                 | MSM0461, MSM1398          |
| 1                                                                        | COG4023 | Preprotein translocase subunit Sec61beta                                                                   | MSM1363                   |
| 1                                                                        | COG4962 | Flp pilus assembly protein, ATPase CpaF                                                                    | MSM0597                   |
| 2                                                                        | COG4965 | Flp pilus assembly protein TadB                                                                            | MSM0471, MSM0596          |
| <b>Post-translational Modification, Protein Turnover, Chaperones (O)</b> |         |                                                                                                            |                           |
| 1                                                                        | COG0068 | Hydrogenase maturation factor                                                                              | MSM1106                   |
| 1                                                                        | COG0071 | Molecular chaperone (small heat shock protein)                                                             | MSM0870                   |
| 1                                                                        | COG0225 | Peptide methionine sulfoxide reductase                                                                     | MSM0582                   |
| 1                                                                        | COG0298 | Hydrogenase maturation factor                                                                              | MSM0636                   |
| 1                                                                        | COG0309 | Hydrogenase maturation factor                                                                              | MSM1492                   |
| 1                                                                        | COG0396 | ABC-type transport system involved in Fe-S cluster assembly, ATPase component                              | MSM1003                   |
| 1                                                                        | COG0409 | Hydrogenase maturation factor                                                                              | MSM0945                   |
| 1                                                                        | COG0443 | Molecular chaperone                                                                                        | MSM1109                   |
| 3                                                                        | COG0459 | Chaperonin GroEL (HSP60 family)                                                                            | MSM0220, MSM0826, MSM1533 |
| 1                                                                        | COG0464 | ATPases of the AAA+ class                                                                                  | MSM0642                   |
| 1                                                                        | COG0484 | DnaJ-class molecular chaperone with C-terminal Zn finger domain                                            | MSM1110                   |
| 1                                                                        | COG0492 | Thioredoxin reductase                                                                                      | MSM0340                   |
| 2                                                                        | COG0501 | Zn-dependent protease with chaperone function                                                              | MSM1174, MSM1203          |
| 1                                                                        | COG0533 | Metal-dependent proteases with possible chaperone activity                                                 | MSM1198                   |
| 1                                                                        | COG0576 | Molecular chaperone GrpE (heat shock protein)                                                              | MSM1108                   |
| 1                                                                        | COG0602 | Organic radical activating enzymes                                                                         | MSM1055                   |
| 2                                                                        | COG0638 | 20S proteasome, alpha and beta subunits                                                                    | MSM0245, MSM1037          |
| 1                                                                        | COG0652 | Peptidyl-prolyl cis-trans isomerase (rotamase) - cyclophilin family                                        | MSM1367                   |
| 1                                                                        | COG0719 | ABC-type transport system involved in Fe-S cluster assembly, permease component                            | MSM1002                   |
| 1                                                                        | COG0785 | Cytochrome c biogenesis protein                                                                            | MSM0549                   |
| 3                                                                        | COG0826 | Collagenase and related proteases                                                                          | MSM0522, MSM0523, MSM1705 |
| 1                                                                        | COG1047 | FKBP-type peptidyl-prolyl cis-trans isomerases 2                                                           | MSM0930                   |
| 1                                                                        | COG1067 | Predicted ATP-dependent protease                                                                           | MSM1569                   |
| 3                                                                        | COG1180 | Pyruvate-formate lyase-activating enzyme                                                                   | MSM0538, MSM0652, MSM1284 |

|                                             |         |                                                                                                                      |                                                                                                            |
|---------------------------------------------|---------|----------------------------------------------------------------------------------------------------------------------|------------------------------------------------------------------------------------------------------------|
| 1                                           | COG1222 | ATP-dependent 26S proteasome regulatory subunit                                                                      | MSM0354                                                                                                    |
| 1                                           | COG1382 | Prefoldin, chaperonin cofactor                                                                                       | MSM1634                                                                                                    |
| 1                                           | COG1397 | ADP-ribosylglycohydrolase                                                                                            | MSM1572                                                                                                    |
| 1                                           | COG1730 | Predicted prefoldin, molecular chaperone implicated in de novo protein folding                                       | MSM0702                                                                                                    |
| 1                                           | COG1899 | Deoxyhypusine synthase                                                                                               | MSM1615                                                                                                    |
| 1                                           | COG1973 | Hydrogenase maturation factor                                                                                        | MSM1158                                                                                                    |
| 1                                           | COG2143 | Thioredoxin-related protein                                                                                          | MSM0550                                                                                                    |
| 1                                           | COG4070 | Predicted peptidyl-prolyl cis-trans isomerase (rotamase), cyclophilin family                                         | MSM0813                                                                                                    |
| 1                                           | COG4930 | Predicted ATP-dependent Lon-type protease                                                                            | MSM1754                                                                                                    |
| <b>Energy Production and Conversion (C)</b> |         |                                                                                                                      |                                                                                                            |
| 1                                           | COG0045 | Succinyl-CoA synthetase, beta subunit                                                                                | MSM0924                                                                                                    |
| 1                                           | COG0074 | Succinyl-CoA synthetase, alpha subunit                                                                               | MSM0228                                                                                                    |
| 1                                           | COG0221 | Inorganic pyrophosphatase                                                                                            | MSM0198                                                                                                    |
| 1                                           | COG0240 | Glycerol-3-phosphate dehydrogenase                                                                                   | MSM1540                                                                                                    |
| 2                                           | COG0243 | Aerobic dehydrogenases, typically selenocysteine-containing                                                          | MSM1404, MSM1463                                                                                           |
| 1                                           | COG0247 | Fe-S oxidoreductase                                                                                                  | MSM1625                                                                                                    |
| 1                                           | COG0371 | Glycerol dehydrogenase and related enzymes                                                                           | MSM0286                                                                                                    |
| 1                                           | COG0372 | Citrate synthase                                                                                                     | MSM0446                                                                                                    |
| 2                                           | COG0426 | Uncharacterized flavoproteins                                                                                        | MSM0222, MSM1349                                                                                           |
| 1                                           | COG0479 | Succinate dehydrogenase/fumarate reductase, Fe-S protein subunit                                                     | MSM0393                                                                                                    |
| 1                                           | COG0636 | F <sub>0</sub> F <sub>1</sub> -type ATP synthase, subunit c/Archaeal/vacuolar-type H <sup>+</sup> -ATPase, subunit K | MSM0439                                                                                                    |
| 1                                           | COG0644 | Dehydrogenases (flavoproteins)                                                                                       | MSM1701                                                                                                    |
| 2                                           | COG0650 | Formate hydrogenlyase subunit 4                                                                                      | MSM0317, MSM1062                                                                                           |
| 3                                           | COG0674 | Pyruvate:ferredoxin oxidoreductase and related 2-oxoacid:ferredoxin oxidoreductases, alpha subunit                   | MSM0332, MSM0559, MSM0927                                                                                  |
| 1                                           | COG0680 | Ni,Fe-hydrogenase maturation factor                                                                                  | MSM1123                                                                                                    |
| 3                                           | COG0716 | Flavodoxins                                                                                                          | MSM0062, MSM0503, MSM0861                                                                                  |
| 1                                           | COG0731 | Fe-S oxidoreductases                                                                                                 | MSM0922                                                                                                    |
| 4                                           | COG0778 | Nitroreductase                                                                                                       | MSM0445, MSM1293, MSM1574, MSM1722                                                                         |
| 1                                           | COG0822 | NifU homolog involved in Fe-S cluster formation                                                                      | MSM0263                                                                                                    |
| 1                                           | COG1012 | NAD-dependent aldehyde dehydrogenases                                                                                | MSM0467                                                                                                    |
| 3                                           | COG1013 | Pyruvate:ferredoxin oxidoreductase and related 2-oxoacid:ferredoxin oxidoreductases, beta subunit                    | MSM0333, MSM0560, MSM0926                                                                                  |
| 3                                           | COG1014 | Pyruvate:ferredoxin oxidoreductase and related 2-oxoacid:ferredoxin oxidoreductases, gamma subunit                   | MSM0391, MSM0557, MSM0925                                                                                  |
| 1                                           | COG1029 | Formylmethanofuran dehydrogenase subunit B                                                                           | MSM1412                                                                                                    |
| 2                                           | COG1032 | Fe-S oxidoreductase                                                                                                  | MSM0696, MSM0787                                                                                           |
| 4                                           | COG1035 | Coenzyme F <sub>420</sub> -reducing hydrogenase, beta subunit                                                        | MSM0135, MSM1121, MSM1405, MSM1462                                                                         |
| 1                                           | COG1036 | Archaeal flavoproteins                                                                                               | MSM1338                                                                                                    |
| 1                                           | COG1042 | Acyl-CoA synthetase (NDP forming)                                                                                    | MSM1471                                                                                                    |
| 1                                           | COG1053 | Succinate dehydrogenase/fumarate reductase, flavoprotein subunit                                                     | MSM1258                                                                                                    |
| 1                                           | COG1139 | Uncharacterized conserved protein containing a ferredoxin-like domain                                                | MSM1626                                                                                                    |
| 2                                           | COG1142 | Fe-S-cluster-containing hydrogenase components 2                                                                     | MSM0561, MSM0562                                                                                           |
| 2                                           | COG1143 | Formate hydrogenlyase subunit 6/NADH:ubiquinone oxidoreductase 23 kD subunit (chain I)                               | MSM0998, MSM1065                                                                                           |
| 1                                           | COG1144 | Pyruvate:ferredoxin oxidoreductase and related 2-oxoacid:ferredoxin oxidoreductases, delta subunit                   | MSM0558                                                                                                    |
| 12                                          | COG1145 | Ferredoxin                                                                                                           | MSM0136, MSM0306, MSM0310, MSM0311, MSM0395, MSM0579, MSM0783, MSM0784, MSM1066, MSM1409, MSM1410, MSM1700 |
| 5                                           | COG1146 | Ferredoxin                                                                                                           | MSM0085, MSM0209, MSM0331, MSM0928, MSM1408                                                                |
| 2                                           | COG1148 | Heterodisulfide reductase, subunit A and related polyferredoxins                                                     | MSM0082, MSM1336                                                                                           |
| 2                                           | COG1150 | Heterodisulfide reductase, subunit C                                                                                 | MSM0084, MSM0796                                                                                           |
| 1                                           | COG1151 | 6Fe-6S prismane cluster-containing protein                                                                           | MSM1446                                                                                                    |
| 1                                           | COG1153 | Formylmethanofuran dehydrogenase subunit D                                                                           | MSM1411                                                                                                    |
| 1                                           | COG1155 | Archaeal/vacuolar-type H <sup>+</sup> -ATPase subunit A                                                              | MSM0435                                                                                                    |
| 1                                           | COG1156 | Archaeal/vacuolar-type H <sup>+</sup> -ATPase subunit B                                                              | MSM0434                                                                                                    |
| 1                                           | COG1229 | Formylmethanofuran dehydrogenase subunit A                                                                           | MSM1413                                                                                                    |
| 1                                           | COG1249 | Pyruvate/2-oxoglutarate dehydrogenase complex, dihydrolipoamide dehydrogenase (E3) component, and related enzymes    | MSM0637                                                                                                    |
| 1                                           | COG1269 | Archaeal/vacuolar-type H <sup>+</sup> -ATPase subunit I                                                              | MSM0440                                                                                                    |
| 1                                           | COG1304 | L-lactate dehydrogenase (FMN-dependent) and related alpha-hydroxy acid dehydrogenases                                | MSM1441                                                                                                    |
| 1                                           | COG1390 | Archaeal/vacuolar-type H <sup>+</sup> -ATPase subunit E                                                              | MSM0438                                                                                                    |
| 1                                           | COG1394 | Archaeal/vacuolar-type H <sup>+</sup> -ATPase subunit D                                                              | MSM0433                                                                                                    |
| 2                                           | COG1413 | FOG: HEAT repeat                                                                                                     | MSM0372, MSM0501                                                                                           |
| 1                                           | COG1436 | Archaeal/vacuolar-type H <sup>+</sup> -ATPase subunit F                                                              | MSM0436                                                                                                    |
| 2                                           | COG1526 | Uncharacterized protein required for formate dehydrogenase activity                                                  | MSM0295, MSM1392                                                                                           |
| 1                                           | COG1527 | Archaeal/vacuolar-type H <sup>+</sup> -ATPase subunit C                                                              | MSM0437                                                                                                    |
| 2                                           | COG1592 | Rubryerythrin                                                                                                        | MSM1348, MSM1733                                                                                           |

|                                                  |         |                                                                                                                         |                           |
|--------------------------------------------------|---------|-------------------------------------------------------------------------------------------------------------------------|---------------------------|
| 1                                                | COG1600 | Uncharacterized Fe-S protein                                                                                            | MSM0609                   |
| 1                                                | COG1625 | Fe-S oxidoreductase, related to NifB/MoaA family                                                                        | MSM1020                   |
| 2                                                | COG1773 | Rubredoxin                                                                                                              | MSM0187, MSM0188          |
| 2                                                | COG1838 | Tartrate dehydratase beta subunit/Fumarate hydratase class I, C-terminal domain                                         | MSM0769, MSM0929          |
| 2                                                | COG1908 | Coenzyme F420-reducing hydrogenase, delta subunit                                                                       | MSM1001, MSM1461          |
| 2                                                | COG1941 | Coenzyme F420-reducing hydrogenase, gamma subunit                                                                       | MSM1000, MSM1122          |
| 2                                                | COG1951 | Tartrate dehydratase alpha subunit/Fumarate hydratase class I, N-terminal domain                                        | MSM0447, MSM0563          |
| 1                                                | COG2033 | Desulfoferrodoxin                                                                                                       | MSM0262                   |
| 2                                                | COG2037 | Formylmethanofuran:tetrahydromethanopterin formyltransferase                                                            | MSM0308, MSM1092          |
| 2                                                | COG2048 | Heterodisulfide reductase, subunit B                                                                                    | MSM0083, MSM0795          |
| 1                                                | COG2055 | Malate/L-lactate dehydrogenases                                                                                         | MSM1040                   |
| 1                                                | COG2141 | Coenzyme F420-dependent N5,N10-methylene tetrahydromethanopterin reductase and related flavin-dependent oxidoreductases | MSM0542                   |
| 1                                                | COG2191 | Formylmethanofuran dehydrogenase subunit E                                                                              | MSM1396                   |
| 1                                                | COG2218 | Formylmethanofuran dehydrogenase subunit C                                                                              | MSM1414                   |
| 1                                                | COG2710 | Nitrogenase molybdenum-iron protein, alpha and beta chains                                                              | MSM1160                   |
| 1                                                | COG2811 | Archaeal/vacuolar-type H+-ATPase subunit H                                                                              | MSM0441                   |
| 2                                                | COG3259 | Coenzyme F420-reducing hydrogenase, alpha subunit                                                                       | MSM0999, MSM1124          |
| 1                                                | COG3260 | Ni,Fe-hydrogenase III small subunit                                                                                     | MSM1064                   |
| 1                                                | COG3261 | Ni,Fe-hydrogenase III large subunit                                                                                     | MSM1063                   |
| 2                                                | COG4231 | Indolepyruvate ferredoxin oxidoreductase, alpha and beta subunits                                                       | MSM0392, MSM1460          |
| 1                                                | COG5016 | Pyruvate/oxaloacetate carboxyltransferase                                                                               | MSM0939                   |
| <b>Carbohydrate Transport and Metabolism (G)</b> |         |                                                                                                                         |                           |
| 1                                                | COG0057 | Glyceraldehyde-3-phosphate dehydrogenase/erythrose-4-phosphate dehydrogenase                                            | MSM0962                   |
| 1                                                | COG0063 | Predicted sugar kinase                                                                                                  | MSM1091                   |
| 1                                                | COG0120 | Ribose 5-phosphate isomerase                                                                                            | MSM0284                   |
| 1                                                | COG0126 | 3-phosphoglycerate kinase                                                                                               | MSM0918                   |
| 1                                                | COG0148 | Enolase                                                                                                                 | MSM1435                   |
| 1                                                | COG0149 | Triosephosphate isomerase                                                                                               | MSM0919                   |
| 1                                                | COG0235 | Ribulose-5-phosphate 4-epimerase and related epimerases and aldolases                                                   | MSM1270                   |
| 1                                                | COG0483 | Archaeal fructose-1,6-bisphosphatase and related enzymes of inositol monophosphatase family                             | MSM0879                   |
| 3                                                | COG0524 | Sugar kinases, ribokinase family                                                                                        | MSM0307, MSM1389, MSM1693 |
| 2                                                | COG0574 | Phosphoenolpyruvate synthase/pyruvate phosphate dikinase                                                                | MSM0823, MSM0988          |
| 1                                                | COG0580 | Glycerol uptake facilitator and related permeases (Major Intrinsic Protein Family)                                      | MSM1085                   |
| 2                                                | COG1082 | Sugar phosphate isomerases/epimerases                                                                                   | MSM1184, MSM1251          |
| 2                                                | COG1109 | Phosphomannomutase                                                                                                      | MSM0648, MSM0656          |
| 1                                                | COG1363 | Cellulase M and related proteins                                                                                        | MSM0134                   |
| 1                                                | COG1830 | DhnA-type fructose-1,6-bisphosphate aldolase and related enzymes                                                        | MSM0056                   |
| 1                                                | COG1980 | Archaeal fructose 1,6-bisphosphatase                                                                                    | MSM0615                   |
| 2                                                | COG2074 | 2-phosphoglycerate kinase                                                                                               | MSM0408, MSM0791          |
| 2                                                | COG2730 | Endoglucanase                                                                                                           | MSM1051, MSM1125          |
| 2                                                | COG2814 | Arabinose efflux permease                                                                                               | MSM1459, MSM1465          |
| 2                                                | COG3635 | Predicted phosphoglycerate mutase, AP superfamily                                                                       | MSM0153, MSM0657          |
| 1                                                | COG5297 | Cellobiohydrolase A (1,4-beta-cellobiosidase A)                                                                         | MSM0958                   |
| <b>Amino Acid Transport and Metabolism (E)</b>   |         |                                                                                                                         |                           |
| 1                                                | COG0002 | Acetylglutamate semialdehyde dehydrogenase                                                                              | MSM0860                   |
| 1                                                | COG0006 | Xaa-Pro aminopeptidase                                                                                                  | MSM0472                   |
| 1                                                | COG0019 | Diaminopimelate decarboxylase                                                                                           | MSM1371                   |
| 1                                                | COG0031 | Cysteine synthase                                                                                                       | MSM0271                   |
| 1                                                | COG0040 | ATP phosphoribosyltransferase                                                                                           | MSM1261                   |
| 2                                                | COG0065 | 3-isopropylmalate dehydratase large subunit                                                                             | MSM0723, MSM1300          |
| 2                                                | COG0066 | 3-isopropylmalate dehydratase small subunit                                                                             | MSM0847, MSM1299          |
| 1                                                | COG0067 | Glutamate synthase domain 1                                                                                             | MSM0370                   |
| 2                                                | COG0069 | Glutamate synthase domain 2                                                                                             | MSM0027, MSM0368          |
| 1                                                | COG0070 | Glutamate synthase domain 3                                                                                             | MSM0369                   |
| 2                                                | COG0075 | Serine-pyruvate aminotransferase/archaeal aspartate aminotransferase                                                    | MSM0677, MSM1513          |
| 1                                                | COG0076 | Glutamate decarboxylase and related PLP-dependent proteins                                                              | MSM0987                   |
| 1                                                | COG0077 | Prephenate dehydratase                                                                                                  | MSM1052                   |
| 1                                                | COG0078 | Ornithine carbamoyltransferase                                                                                          | MSM1226                   |
| 2                                                | COG0079 | Histidinol-phosphate/aromatic aminotransferase and coibic acid decarboxylase                                            | MSM0653, MSM1516          |
| 1                                                | COG0082 | Chorismate synthase                                                                                                     | MSM1474                   |
| 1                                                | COG0106 | Phosphoribosylformimino-5-aminoimidazole carboxamide ribonucleotide (ProFAR) isomerase                                  | MSM0858                   |
| 1                                                | COG0107 | Imidazoleglycerol-phosphate synthase                                                                                    | MSM1364                   |
| 1                                                | COG0112 | Glycine/serine hydroxymethyltransferase                                                                                 | MSM1337                   |
| 1                                                | COG0118 | Glutamine amidotransferase                                                                                              | MSM1159                   |
| 3                                                | COG0119 | Isopropylmalate/homocitrate/citramalate synthases                                                                       | MSM0350, MSM0722, MSM1246 |
| 1                                                | COG0128 | 5-enolpyruvylshikimate-3-phosphate synthase                                                                             | MSM0273                   |
| 1                                                | COG0131 | Imidazoleglycerol-phosphate dehydratase                                                                                 | MSM1206                   |
| 1                                                | COG0133 | Tryptophan synthase beta chain                                                                                          | MSM1142                   |



|                                                  |         |                                                                                                    |                           |
|--------------------------------------------------|---------|----------------------------------------------------------------------------------------------------|---------------------------|
| 1                                                | COG0134 | Indole-3-glycerol phosphate synthase                                                               | MSM1143                   |
| 1                                                | COG0136 | Aspartate-semialdehyde dehydrogenase                                                               | MSM0829                   |
| 1                                                | COG0137 | Argininosuccinate synthase                                                                         | MSM1084                   |
| 1                                                | COG0139 | Phosphoribosyl-AMP cyclohydrolase                                                                  | MSM1182                   |
| 1                                                | COG0140 | Phosphoribosyl-ATP pyrophosphohydrolase                                                            | MSM1103                   |
| 1                                                | COG0141 | Histidinol dehydrogenase                                                                           | MSM1238                   |
| 1                                                | COG0165 | Argininosuccinate lyase                                                                            | MSM0192                   |
| 1                                                | COG0169 | Shikimate 5-dehydrogenase                                                                          | MSM1179                   |
| 1                                                | COG0174 | Glutamine synthetase                                                                               | MSM1418                   |
| 1                                                | COG0253 | Diaminopimelate epimerase                                                                          | MSM1372                   |
| 1                                                | COG0287 | Prephenate dehydrogenase                                                                           | MSM0641                   |
| 1                                                | COG0289 | Dihydrodipicolinate reductase                                                                      | MSM0830                   |
| 1                                                | COG0334 | Glutamate dehydrogenase/leucine dehydrogenase                                                      | MSM0888                   |
| 1                                                | COG0345 | Pyrroline-5-carboxylate reductase                                                                  | MSM0089                   |
| 1                                                | COG0346 | Lactoylglutathione lyase and related lyases                                                        | MSM1366                   |
| 1                                                | COG0347 | Nitrogen regulatory protein PII                                                                    | MSM0233                   |
| 1                                                | COG0367 | Asparagine synthase (glutamine-hydrolyzing)                                                        | MSM0160                   |
| 3                                                | COG0436 | Aspartate/tyrosine/aromatic aminotransferase                                                       | MSM0610, MSM0788, MSM1455 |
| 1                                                | COG0440 | Acetolactate synthase, small (regulatory) subunit                                                  | MSM1224                   |
| 1                                                | COG0460 | Homoserine dehydrogenase                                                                           | MSM0154                   |
| 1                                                | COG0498 | Threonine synthase                                                                                 | MSM0214                   |
| 1                                                | COG0527 | Aspartokinases                                                                                     | MSM0832                   |
| 1                                                | COG0547 | Anthranilate phosphoribosyltransferase                                                             | MSM1144                   |
| 1                                                | COG0548 | Acetylglutamate kinase                                                                             | MSM0375                   |
| 1                                                | COG0560 | Phosphoserine phosphatase                                                                          | MSM0719                   |
| 1                                                | COG0620 | Methionine synthase II (cobalamin-independent)                                                     | MSM0102                   |
| 1                                                | COG0710 | 3-dehydroquinate dehydratase                                                                       | MSM0231                   |
| 1                                                | COG0747 | ABC-type dipeptide transport system, periplasmic component                                         | MSM0300                   |
| 1                                                | COG0765 | ABC-type amino acid transport system, permease component                                           | MSM0806                   |
| 1                                                | COG1045 | Serine acetyltransferase                                                                           | MSM0270                   |
| 1                                                | COG1104 | Cysteine sulfinate desulfinate/cysteine desulfurase and related enzymes                            | MSM0264                   |
| 1                                                | COG1125 | ABC-type proline/glycine betaine transport systems, ATPase components                              | MSM0990                   |
| 1                                                | COG1126 | ABC-type polar amino acid transport system, ATPase component                                       | MSM0805                   |
| 1                                                | COG1168 | Bifunctional PLP-dependent enzyme with beta-cystathionase and maltose regulon repressor activities | MSM0044                   |
| 1                                                | COG1174 | ABC-type proline/glycine betaine transport systems, permease component                             | MSM0991                   |
| 2                                                | COG1305 | Transglutaminase-like enzymes, putative cysteine proteases                                         | MSM0219, MSM0786          |
| 1                                                | COG1465 | Predicted alternative 3-dehydroquinate synthase                                                    | MSM0055                   |
| 1                                                | COG1605 | Chorismate mutase                                                                                  | MSM0834                   |
| 1                                                | COG1812 | Archaeal S-adenosylmethionine synthetase                                                           | MSM1340                   |
| 1                                                | COG1921 | Selenocysteine synthase [seryl-tRNA <sup>Sec</sup> selenium transferase]                           | MSM0767                   |
| 1                                                | COG2021 | Homoserine acetyltransferase                                                                       | MSM0496                   |
| 1                                                | COG2061 | ACT-domain-containing protein, predicted allosteric regulator of homoserine dehydrogenase          | MSM0155                   |
| 1                                                | COG2303 | Choline dehydrogenase and related flavoproteins                                                    | MSM0865                   |
| 1                                                | COG2423 | Predicted ornithine cyclodeaminase, mu-crystallin homolog                                          | MSM1517                   |
| 1                                                | COG2856 | Predicted Zn peptidase                                                                             | MSM1529                   |
| 2                                                | COG2873 | O-acetylhomoserine sulfhydrylase                                                                   | MSM0174, MSM0265          |
| 1                                                | COG4992 | Ornithine/acetylornithine aminotransferase                                                         | MSM1368                   |
| <b>Nucleic Acid Transport and Metabolism (F)</b> |         |                                                                                                    |                           |
| 1                                                | COG0005 | Purine nucleoside phosphorylase                                                                    | MSM0665                   |
| 1                                                | COG0015 | Adenylosuccinate lyase                                                                             | MSM1151                   |
| 1                                                | COG0034 | Glutamine phosphoribosylpyrophosphate amidotransferase                                             | MSM1704                   |
| 1                                                | COG0035 | Uracil phosphoribosyltransferase                                                                   | MSM0398                   |
| 1                                                | COG0041 | Phosphoribosylcarboxyaminoimidazole (NCAIR) mutase                                                 | MSM1287                   |
| 1                                                | COG0044 | Dihydroorotate and related cyclic amidohydrolases                                                  | MSM0997                   |
| 1                                                | COG0046 | Phosphoribosylformylglycinamide (FGAM) synthase, synthetase domain                                 | MSM1342                   |
| 1                                                | COG0047 | Phosphoribosylformylglycinamide (FGAM) synthase, glutamine amidotransferase domain                 | MSM1549                   |
| 1                                                | COG0104 | Adenylosuccinate synthase                                                                          | MSM1468                   |
| 1                                                | COG0105 | Nucleoside diphosphate kinase                                                                      | MSM0203                   |
| 2                                                | COG0125 | Thymidylate kinase                                                                                 | MSM0077, MSM0520          |
| 1                                                | COG0127 | Xanthosine triphosphate pyrophosphatase                                                            | MSM1195                   |
| 1                                                | COG0150 | Phosphoribosylaminoimidazole (AIR) synthetase                                                      | MSM1039                   |
| 1                                                | COG0151 | Phosphoribosylamine-glycine ligase                                                                 | MSM1227                   |
| 1                                                | COG0152 | Phosphoribosylaminoimidazolesuccinocarboxamide (SAICAR) synthase                                   | MSM1547                   |
| 1                                                | COG0167 | Dihydroorotate dehydrogenase                                                                       | MSM1044                   |
| 1                                                | COG0207 | Thymidylate synthase                                                                               | MSM1734                   |
| 1                                                | COG0274 | Deoxyribose-phosphate aldolase                                                                     | MSM0843                   |
| 1                                                | COG0284 | Orotidine-5'-phosphate decarboxylase                                                               | MSM1617                   |
| 1                                                | COG0461 | Orotate phosphoribosyltransferase                                                                  | MSM0821                   |
| 1                                                | COG0503 | Adenine/guanine phosphoribosyltransferases and related PRPP-binding proteins                       | MSM1359                   |
| 1                                                | COG0504 | CTP synthase (UTP-ammonia lyase)                                                                   | MSM0147                   |
| 1                                                | COG0516 | IMP dehydrogenase/GMP reductase                                                                    | MSM1629                   |
| 1                                                | COG0518 | GMP synthase - Glutamine amidotransferase domain                                                   | MSM0343                   |

|                                              |         |                                                                                             |                  |
|----------------------------------------------|---------|---------------------------------------------------------------------------------------------|------------------|
| 1                                            | COG0519 | GMP synthase, PP-ATPase domain/subunit                                                      | MSM0345          |
| 1                                            | COG0528 | Uridylate kinase                                                                            | MSM0415          |
| 1                                            | COG0540 | Aspartate carbamoyltransferase, catalytic chain                                             | MSM1263          |
| 2                                            | COG0717 | Deoxycytidine deaminase                                                                     | MSM0402, MSM0687 |
| 1                                            | COG0856 | Orotate phosphoribosyltransferase homologs                                                  | MSM0883          |
| 1                                            | COG1001 | Adenine deaminase                                                                           | MSM0874          |
| 1                                            | COG1051 | ADP-ribose pyrophosphatase                                                                  | MSM1355          |
| 1                                            | COG1102 | Cytidylate kinase                                                                           | MSM0734          |
| 1                                            | COG1328 | Oxygen-sensitive ribonucleoside-triphosphate reductase                                      | MSM1383          |
| 1                                            | COG1437 | Adenylate cyclase, class 2 (thermophilic)                                                   | MSM0721          |
| 1                                            | COG1781 | Aspartate carbamoyltransferase, regulatory subunit                                          | MSM0862          |
| 1                                            | COG1828 | Phosphoribosylformylglycinamide (FGAM) synthase, PurS component                             | MSM1548          |
| 1                                            | COG1936 | Predicted nucleotide kinase (related to CMP and AMP kinases)                                | MSM0713          |
| 1                                            | COG2019 | Archaeal adenylate kinase                                                                   | MSM0737          |
| 1                                            | COG2233 | Xanthine/uracil permeases                                                                   | MSM0397          |
| 1                                            | COG3363 | Archaeal IMP cyclohydrolase                                                                 | MSM0976          |
| <b>Coenzyme Transport and Metabolism (H)</b> |         |                                                                                             |                  |
| 1                                            | COG0001 | Glutamate-1-semialdehyde aminotransferase                                                   | MSM1233          |
| 1                                            | COG0007 | Uroporphyrinogen-III methylase                                                              | MSM1550          |
| 1                                            | COG0043 | 3-polyprenyl-4-hydroxybenzoate decarboxylase and related decarboxylases                     | MSM1286          |
| 1                                            | COG0054 | Riboflavin synthase beta-chain                                                              | MSM1296          |
| 1                                            | COG0108 | 3,4-dihydroxy-2-butanone 4-phosphate synthase                                               | MSM1256          |
| 1                                            | COG0113 | Delta-aminolevulinic acid dehydratase                                                       | MSM1476          |
| 1                                            | COG0142 | Geranylgeranyl pyrophosphate synthase                                                       | MSM1443          |
| 1                                            | COG0157 | Nicotinate-nucleotide pyrophosphorylase                                                     | MSM0491          |
| 1                                            | COG0163 | 3-polyprenyl-4-hydroxybenzoate decarboxylase                                                | MSM0237          |
| 1                                            | COG0171 | NAD synthase                                                                                | MSM1171          |
| 1                                            | COG0181 | Porphobilinogen deaminase                                                                   | MSM0881          |
| 1                                            | COG0237 | Dephospho-CoA kinase                                                                        | MSM0141          |
| 1                                            | COG0294 | Dihydropteroate synthase and related enzymes                                                | MSM0556          |
| 1                                            | COG0301 | Thiamine biosynthesis ATP pyrophosphatase                                                   | MSM0617          |
| 2                                            | COG0303 | Molybdopterin biosynthesis enzyme                                                           | MSM0950, MSM1343 |
| 1                                            | COG0311 | Predicted glutamine amidotransferase involved in pyridoxine biosynthesis                    | MSM0371          |
| 1                                            | COG0314 | Molybdopterin converting factor, large subunit                                              | MSM0130          |
| 1                                            | COG0315 | Molybdenum cofactor biosynthesis enzyme                                                     | MSM1362          |
| 1                                            | COG0340 | Biotin-(acetyl-CoA carboxylase) ligase                                                      | MSM0766          |
| 1                                            | COG0351 | Hydroxymethylpyrimidine/phosphomethylpyrimidine kinase                                      | MSM0289          |
| 1                                            | COG0352 | Thiamine monophosphate synthase                                                             | MSM0917          |
| 1                                            | COG0373 | Glutamyl-tRNA reductase                                                                     | MSM0967          |
| 1                                            | COG0379 | Quinolinate synthase                                                                        | MSM0494          |
| 1                                            | COG0382 | 4-hydroxybenzoate polyprenyltransferase and related prenyltransferases                      | MSM0941          |
| 1                                            | COG0407 | Uroporphyrinogen-III decarboxylase                                                          | MSM0518          |
| 2                                            | COG0422 | Thiamine biosynthesis protein ThiC                                                          | MSM0644, MSM1388 |
| 2                                            | COG0452 | Phosphopantothenoylcysteine synthetase/decarboxylase                                        | MSM1048, MSM1049 |
| 1                                            | COG0476 | Dinucleotide-utilizing enzymes involved in molybdopterin and thiamine biosynthesis family 2 | MSM0729          |
| 1                                            | COG0499 | S-adenosylhomocysteine hydrolase                                                            | MSM0727          |
| 2                                            | COG0502 | Biotin synthase and related enzymes                                                         | MSM0573, MSM1099 |
| 1                                            | COG0521 | Molybdopterin biosynthesis enzymes                                                          | MSM0820          |
| 1                                            | COG0611 | Thiamine monophosphate kinase                                                               | MSM1283          |
| 1                                            | COG0684 | Demethylmenaquinone methyltransferase                                                       | MSM0426          |
| 1                                            | COG0720 | 6-pyruvoyl-tetrahydropterin synthase                                                        | MSM1056          |
| 1                                            | COG0746 | Molybdopterin-guanine dinucleotide biosynthesis protein A                                   | MSM0240          |
| 1                                            | COG1010 | Precorrin-3B methylase                                                                      | MSM1273          |
| 1                                            | COG1056 | Nicotinamide mononucleotide adenyltransferase                                               | MSM0129          |
| 1                                            | COG1270 | Cobalamin biosynthesis protein CobD/CbiB                                                    | MSM1266          |
| 2                                            | COG1429 | Cobalamin biosynthesis protein CobN and related Mg-chelatases                               | MSM1117, MSM1715 |
| 1                                            | COG1488 | Nicotinic acid phosphoribosyltransferase                                                    | MSM1792          |
| 2                                            | COG1492 | Cobyrinic acid synthase                                                                     | MSM1254, MSM1565 |
| 2                                            | COG1541 | Coenzyme F390 synthetase                                                                    | MSM0387, MSM1714 |
| 1                                            | COG1587 | Uroporphyrinogen-III synthase                                                               | MSM1504          |
| 1                                            | COG1648 | Siroheme synthase (precorrin-2 oxidase/ferrochelatase domain)                               | MSM0968          |
| 1                                            | COG1731 | Archaeal riboflavin synthase                                                                | MSM1622          |
| 1                                            | COG1763 | Molybdopterin-guanine dinucleotide biosynthesis protein                                     | MSM1407          |
| 1                                            | COG1767 | Triphosphoribosyl-dephospho-CoA synthetase                                                  | MSM1477          |
| 1                                            | COG1797 | Cobyrinic acid a,c-diamide synthase                                                         | MSM1215          |
| 1                                            | COG1893 | Ketopantoate reductase                                                                      | MSM0033          |
| 2                                            | COG1962 | Tetrahydromethanopterin S-methyltransferase, subunit H                                      | MSM0627, MSM1007 |
| 1                                            | COG1985 | Pyrimidine reductase, riboflavin biosynthesis                                               | MSM0065          |
| 1                                            | COG2038 | NaMN:DMB phosphoribosyltransferase                                                          | MSM1200          |
| 1                                            | COG2073 | Cobalamin biosynthesis protein CbiG                                                         | MSM1267          |
| 1                                            | COG2082 | Precorrin isomerase                                                                         | MSM1234          |
| 1                                            | COG2099 | Precorrin-6x reductase                                                                      | MSM0896          |
| 1                                            | COG2104 | Sulfur transfer protein involved in thiamine biosynthesis                                   | MSM0552          |
| 1                                            | COG2145 | Hydroxyethylthiazole kinase, sugar kinase family                                            | MSM0916          |

|                                                   |         |                                                                                    |                                    |
|---------------------------------------------------|---------|------------------------------------------------------------------------------------|------------------------------------|
| 3                                                 | COG2226 | Methylase involved in ubiquinone/menaquinone biosynthesis                          | MSM1448, MSM1558, MSM1564          |
| 1                                                 | COG2241 | Precorrin-6B methylase 1                                                           | MSM1167                            |
| 1                                                 | COG2242 | Precorrin-6B methylase 2                                                           | MSM0238                            |
| 1                                                 | COG2243 | Precorrin-2 methylase                                                              | MSM1351                            |
| 1                                                 | COG2266 | GTP:adenosylcobinamide-phosphate guanylyltransferase                               | MSM1005                            |
| 1                                                 | COG2875 | Precorrin-4 methylase                                                              | MSM0101                            |
| 1                                                 | COG2896 | Molybdenum cofactor biosynthesis enzyme                                            | MSM1406                            |
| 1                                                 | COG3161 | 4-hydroxybenzoate synthetase (chorismate lyase)                                    | MSM0724                            |
| 1                                                 | COG3252 | Methenyltetrahydromethanopterin cyclohydrolase                                     | MSM1723                            |
| 2                                                 | COG4054 | Methyl coenzyme M reductase, beta subunit                                          | MSM0905, MSM1019                   |
| 2                                                 | COG4055 | Methyl coenzyme M reductase, subunit D                                             | MSM0904, MSM1018                   |
| 1                                                 | COG4056 | Methyl coenzyme M reductase, subunit C                                             | MSM1017                            |
| 2                                                 | COG4057 | Methyl coenzyme M reductase, gamma subunit                                         | MSM0903, MSM1016                   |
| 2                                                 | COG4058 | Methyl coenzyme M reductase, alpha subunit                                         | MSM0902, MSM1015                   |
| 1                                                 | COG4059 | Tetrahydromethanopterin S-methyltransferase, subunit E                             | MSM1014                            |
| 1                                                 | COG4060 | Tetrahydromethanopterin S-methyltransferase, subunit D                             | MSM1013                            |
| 1                                                 | COG4061 | Tetrahydromethanopterin S-methyltransferase, subunit C                             | MSM1012                            |
| 1                                                 | COG4062 | Tetrahydromethanopterin S-methyltransferase, subunit B                             | MSM1011                            |
| 1                                                 | COG4063 | Tetrahydromethanopterin S-methyltransferase, subunit A                             | MSM1010                            |
| 1                                                 | COG4064 | Tetrahydromethanopterin S-methyltransferase, subunit G                             | MSM1008                            |
| 1                                                 | COG4218 | Tetrahydromethanopterin S-methyltransferase, subunit F                             | MSM1009                            |
| <b>Lipid Transport and Metabolism (I)</b>         |         |                                                                                    |                                    |
| 1                                                 | COG0020 | Undecaprenyl pyrophosphate synthase                                                | MSM0096                            |
| 1                                                 | COG0170 | Dolichol kinase                                                                    | MSM0078                            |
| 1                                                 | COG0183 | Acetyl-CoA acetyltransferase                                                       | MSM1562                            |
| 1                                                 | COG0365 | Acyl-coenzyme A synthetases/AMP-(fatty) acid ligases                               | MSM0330                            |
| 1                                                 | COG0439 | Biotin carboxylase                                                                 | MSM0765                            |
| 2                                                 | COG0558 | Phosphatidylglycerophosphate synthase                                              | MSM0613, MSM1706                   |
| 1                                                 | COG0575 | CDP-diglyceride synthetase                                                         | MSM0850                            |
| 1                                                 | COG1183 | Phosphatidylserine synthase                                                        | MSM0982                            |
| 2                                                 | COG1211 | 4-diphosphocytidyl-2-methyl-D-erythritol synthase                                  | MSM0377, MSM1542                   |
| 1                                                 | COG1250 | 3-hydroxyacyl-CoA dehydrogenase                                                    | MSM0965                            |
| 1                                                 | COG1257 | Hydroxymethylglutaryl-CoA reductase                                                | MSM0227                            |
| 1                                                 | COG1260 | Myo-inositol-1-phosphate synthase                                                  | MSM0940                            |
| 1                                                 | COG1267 | Phosphatidylglycerophosphatase A and related proteins                              | MSM0934                            |
| 1                                                 | COG1577 | Mevalonate kinase                                                                  | MSM1439                            |
| 1                                                 | COG1924 | Activator of 2-hydroxyglutaryl-CoA dehydratase (HSP70-class ATPase domain)         | MSM0810                            |
| 1                                                 | COG2084 |                                                                                    | MSM0548                            |
| 1                                                 | COG3425 | 3-hydroxy-3-methylglutaryl CoA synthase                                            | MSM1561                            |
| <b>Inorganic Ion Transport and Metabolism (P)</b> |         |                                                                                    |                                    |
| 1                                                 | COG0003 | Oxanion-translocating ATPase                                                       | MSM1170                            |
| 1                                                 | COG0004 | Ammonia permease                                                                   | MSM0234                            |
| 1                                                 | COG0038 | Chloride channel protein Eric                                                      | MSM1721                            |
| 1                                                 | COG0053 | Predicted Co/Zn/Cd cation transporters                                             | MSM0789                            |
| 1                                                 | COG0168 | Trk-type K+ transport systems, membrane components                                 | MSM1095                            |
| 1                                                 | COG0226 | ABC-type phosphate transport system, periplasmic component                         | MSM0568                            |
| 1                                                 | COG0288 | Carbonic anhydrase                                                                 | MSM1223                            |
| 4                                                 | COG0310 | ABC-type Co2+ transport system, permease component                                 | MSM0583, MSM0584, MSM1488, MSM1618 |
| 1                                                 | COG0370 | Fe2+ transport system protein B                                                    | MSM0589                            |
| 1                                                 | COG0474 | Cation transport ATPase                                                            | MSM0895                            |
| 1                                                 | COG0475 | Kef-type K+ transport systems, membrane components                                 | MSM1186                            |
| 1                                                 | COG0530 | Ca2+/Na+ antiporter                                                                | MSM1027                            |
| 1                                                 | COG0569 | K+ transport systems, NAD-binding component                                        | MSM1096                            |
| 1                                                 | COG0573 | ABC-type phosphate transport system, permease component                            | MSM0567                            |
| 1                                                 | COG0581 | ABC-type phosphate transport system, permease component                            | MSM0566                            |
| 1                                                 | COG0600 | ABC-type nitrate/sulfonate/bicarbonate transport system, permease component        | MSM0291                            |
| 1                                                 | COG0609 | ABC-type Fe3+-siderophore transport system, permease component                     | MSM1394                            |
| 1                                                 | COG0614 | ABC-type Fe3+-hydroxamate transport system, periplasmic component                  | MSM1393                            |
| 3                                                 | COG0619 | ABC-type cobalt transport system, permease component CbiQ and related transporters | MSM0585, MSM0771, MSM1620          |
| 2                                                 | COG0704 | Phosphate uptake regulator                                                         | MSM0564, MSM0569                   |
| 1                                                 | COG0715 | ABC-type nitrate/sulfonate/bicarbonate transport systems, periplasmic components   | MSM1469                            |
| 1                                                 | COG0725 | ABC-type molybdate transport system, periplasmic component                         | MSM1609                            |
| 1                                                 | COG0798 | Arsenite efflux pump ACR3 and related permeases                                    | MSM1078                            |
| 1                                                 | COG0855 | Polyphosphate kinase                                                               | MSM1424                            |
| 1                                                 | COG1006 | Multisubunit Na+/H+ antiporter, MnhC subunit                                       | MSM1072                            |
| 1                                                 | COG1116 | ABC-type nitrate/sulfonate/bicarbonate transport system, ATPase component          | MSM0290                            |
| 1                                                 | COG1117 | ABC-type phosphate transport system, ATPase component                              | MSM0565                            |
| 1                                                 | COG1118 | ABC-type sulfate/molybdate transport systems, ATPase component                     | MSM1611                            |
| 2                                                 | COG1122 | ABC-type cobalt transport system, ATPase component                                 | MSM0586, MSM1621                   |
| 1                                                 | COG1230 | Co/Zn/Cd efflux system component                                                   | MSM1639                            |

|                                                                         |         |                                                                                                                          |                                                                                                   |
|-------------------------------------------------------------------------|---------|--------------------------------------------------------------------------------------------------------------------------|---------------------------------------------------------------------------------------------------|
| 1                                                                       | COG1320 | Multisubunit Na <sup>+</sup> /H <sup>+</sup> antiporter, MnhG subunit                                                    | MSM1074                                                                                           |
| 1                                                                       | COG1348 | Nitrogenase subunit NifH (ATPase)                                                                                        | MSM1707                                                                                           |
| 1                                                                       | COG1528 | Ferritin-like protein                                                                                                    | MSM1712                                                                                           |
| 1                                                                       | COG1563 | Predicted subunit of the Multisubunit Na <sup>+</sup> /H <sup>+</sup> antiporter                                         | MSM1073                                                                                           |
| 1                                                                       | COG1824 | Permease, similar to cation transporters                                                                                 | MSM1275                                                                                           |
| 1                                                                       | COG1863 | Multisubunit Na <sup>+</sup> /H <sup>+</sup> antiporter, MnhE subunit                                                    | MSM1076                                                                                           |
| 1                                                                       | COG1918 | Fe <sup>2+</sup> transport system protein A                                                                              | MSM0588                                                                                           |
| 1                                                                       | COG1930 | ABC-type cobalt transport system, periplasmic component                                                                  | MSM1619                                                                                           |
| 2                                                                       | COG2111 | Multisubunit Na <sup>+</sup> /H <sup>+</sup> antiporter, MnhB subunit                                                    | MSM1068, MSM1069                                                                                  |
| 1                                                                       | COG2116 | Formate/nitrite family of transporters                                                                                   | MSM1403                                                                                           |
| 1                                                                       | COG2212 | Multisubunit Na <sup>+</sup> /H <sup>+</sup> antiporter, MnhF subunit                                                    | MSM1075                                                                                           |
| 4                                                                       | COG2217 | Cation transport ATPase                                                                                                  | MSM0293, MSM0960, MSM1127, MSM1153                                                                |
| 1                                                                       | COG2608 | Copper chaperone                                                                                                         | MSM0961                                                                                           |
| 1                                                                       | COG3263 | NhaP-type Na <sup>+</sup> /H <sup>+</sup> and K <sup>+</sup> /H <sup>+</sup> antiporters with a unique C-terminal domain | MSM0618                                                                                           |
| 1                                                                       | COG3420 | Nitrous oxidase accessory protein                                                                                        | MSM1397                                                                                           |
| 1                                                                       | COG4149 | ABC-type molybdate transport system, permease component                                                                  | MSM1610                                                                                           |
| <b>Secondary Metabolites Biosynthesis, Transport and Catabolism (Q)</b> |         |                                                                                                                          |                                                                                                   |
| 1                                                                       | COG1228 | Imidazolonepropionase and related amidohydrolases                                                                        | MSM1154                                                                                           |
| <b>General Function Prediction Only (R)</b>                             |         |                                                                                                                          |                                                                                                   |
| 2                                                                       | COG0110 | Acetyltransferase (isoleucine patch superfamily)                                                                         | MSM0189, MSM1600                                                                                  |
| 2                                                                       | COG0312 | Predicted Zn-dependent proteases and their inactivated homologs                                                          | MSM0866, MSM0947                                                                                  |
| 1                                                                       | COG0375 | Zn finger protein HypA/HybF (possibly regulating hydrogenase expression)                                                 | MSM108                                                                                            |
| 1                                                                       | COG0388 | Predicted amidohydrolase                                                                                                 | MSM0500                                                                                           |
| 1                                                                       | COG0433 | Predicted ATPase                                                                                                         | MSM0122                                                                                           |
| 1                                                                       | COG0446 | Uncharacterized NAD(FAD)-dependent dehydrogenases                                                                        | MSM0046                                                                                           |
| 2                                                                       | COG0456 | Acetyltransferases                                                                                                       | MSM0893, MSM1104                                                                                  |
| 11                                                                      | COG0457 | FOG: TPR repeat                                                                                                          | MSM0530, MSM0651, MSM0914, MSM1449, MSM1451, MSM1740, MSM1766, MSM1776, MSM1786, MSM1787, MSM1788 |
| 2                                                                       | COG0491 | Zn-dependent hydrolases, including glyoxylases                                                                           | MSM0421, MSM1097                                                                                  |
| 1                                                                       | COG0496 | Predicted acid phosphatase                                                                                               | MSM1218                                                                                           |
| 2                                                                       | COG0517 | FOG: CBS domain                                                                                                          | MSM0175, MSM1102                                                                                  |
| 4                                                                       | COG0535 | Predicted Fe-S oxidoreductases                                                                                           | MSM0663, MSM0808, MSM1301, MSM1497                                                                |
| 1                                                                       | COG0561 | Predicted hydrolases of the HAD superfamily                                                                              | MSM0946                                                                                           |
| 1                                                                       | COG0595 | Predicted hydrolase of the metallo-beta-lactamase superfamily                                                            | MSM1442                                                                                           |
| 1                                                                       | COG0603 | Predicted PP-loop superfamily ATPase                                                                                     | MSM0936                                                                                           |
| 1                                                                       | COG0613 | Predicted metal-dependent phosphoesterases (PHP family)                                                                  | MSM1244                                                                                           |
| 1                                                                       | COG0622 | Predicted phosphoesterase                                                                                                | MSM0507                                                                                           |
| 1                                                                       | COG0627 | Predicted esterase                                                                                                       | MSM0149                                                                                           |
| 1                                                                       | COG0628 | Predicted permease                                                                                                       | MSM1042                                                                                           |
| 1                                                                       | COG0641 | Arylsulfatase regulator (Fe-S oxidoreductase)                                                                            | MSM1606                                                                                           |
| 5                                                                       | COG0655 | Multimeric flavodoxin WrbA                                                                                               | MSM0267, MSM0664, MSM0923, MSM1209, MSM1727                                                       |
| 1                                                                       | COG0661 | Predicted unusual protein kinase                                                                                         | MSM0525                                                                                           |
| 1                                                                       | COG0663 | Carbonic anhydrases/acetyltransferases, isoleucine patch superfamily                                                     | MSM0654                                                                                           |
| 1                                                                       | COG0666 | FOG: Ankyrin repeat                                                                                                      | MSM0266                                                                                           |
| 1                                                                       | COG0673 | Predicted dehydrogenases and related proteins                                                                            | MSM0882                                                                                           |
| 1                                                                       | COG0679 | Predicted permeases                                                                                                      | MSM1334                                                                                           |
| 1                                                                       | COG0714 | MoxR-like ATPases                                                                                                        | MSM0555                                                                                           |
| 1                                                                       | COG0730 | Predicted permeases                                                                                                      | MSM0420                                                                                           |
| 3                                                                       | COG0733 | Na <sup>+</sup> -dependent transporters of the SNF family                                                                | MSM0699, MSM1531, MSM1532                                                                         |
| 1                                                                       | COG0824 | Predicted thioesterase                                                                                                   | MSM0133                                                                                           |
| 1                                                                       | COG1011 | Predicted hydrolase (HAD superfamily)                                                                                    | MSM1480                                                                                           |
| 1                                                                       | COG1019 | Predicted nucleotidyltransferase                                                                                         | MSM0785                                                                                           |
| 1                                                                       | COG1078 | HD superfamily phosphohydrolases                                                                                         | MSM0236                                                                                           |
| 1                                                                       | COG1084 | Predicted GTPase                                                                                                         | MSM0869                                                                                           |
| 1                                                                       | COG1094 | Predicted RNA-binding protein (contains KH domains)                                                                      | MSM0954                                                                                           |
| 1                                                                       | COG1099 | Predicted metal-dependent hydrolases with the TIM-barrel fold                                                            | MSM0405                                                                                           |
| 3                                                                       | COG1123 | ATPase components of various ABC-type transport systems, contain duplicated ATPase                                       | MSM0770, MSM0971, MSM1698                                                                         |
| 2                                                                       | COG1163 | Predicted GTPase                                                                                                         | MSM0714, MSM0715                                                                                  |
| 1                                                                       | COG1201 | Lhr-like helicases                                                                                                       | MSM0502                                                                                           |
| 1                                                                       | COG1202 | Superfamily II helicase, archaea-specific                                                                                | MSM1583                                                                                           |
| 1                                                                       | COG1203 | Predicted helicases                                                                                                      | MSM0166                                                                                           |
| 1                                                                       | COG1204 | Superfamily II helicase                                                                                                  | MSM0839                                                                                           |
| 1                                                                       | COG1205 | Distinct helicase family with a unique C-terminal domain including a metal-binding cysteine cluster                      | MSM0112                                                                                           |
| 5                                                                       | COG1216 | Predicted glycosyltransferases                                                                                           | MSM1321, MSM1329, MSM1330, MSM1503, MSM1507                                                       |
| 1                                                                       | COG1223 | Predicted ATPase (AAA+ superfamily)                                                                                      | MSM0966                                                                                           |
| 1                                                                       | COG1234 | Metal-dependent hydrolases of the beta-lactamase superfamily III                                                         | MSM0492                                                                                           |
| 1                                                                       | COG1235 | Metal-dependent hydrolases of the beta-lactamase superfamily I                                                           | MSM1473                                                                                           |
| 1                                                                       | COG1244 | Predicted Fe-S oxidoreductase                                                                                            | MSM0544                                                                                           |

|   |         |                                                                                                           |                                                                                 |
|---|---------|-----------------------------------------------------------------------------------------------------------|---------------------------------------------------------------------------------|
| 1 | COG1245 | Predicted ATPase, RNase L inhibitor (RLI) homolog                                                         | MSM0607                                                                         |
| 1 | COG1253 | Hemolysins and related proteins containing CBS domains                                                    | MSM1026                                                                         |
| 4 | COG1266 | Predicted metal-dependent membrane protease                                                               | MSM0292, MSM0803, MSM1148, MSM1180                                              |
| 1 | COG1268 | Uncharacterized conserved protein                                                                         | MSM0429                                                                         |
| 2 | COG1277 | ABC-type transport system involved in multi-copper enzyme maturation, permease component                  | MSM0594, MSM0595                                                                |
| 1 | COG1287 | Uncharacterized membrane protein, required for N-linked glycosylation                                     | MSM0716                                                                         |
| 1 | COG1310 | Predicted metal-dependent protease of the PAD1/JAB1 superfamily                                           | MSM0462                                                                         |
| 2 | COG1323 | Predicted nucleotidyltransferase                                                                          | MSM0547, MSM0994                                                                |
| 1 | COG1326 | Uncharacterized archaeal Zn-finger protein                                                                | MSM0846                                                                         |
| 2 | COG1342 | Predicted DNA-binding proteins                                                                            | MSM0207, MSM0208                                                                |
| 1 | COG1350 | Predicted alternative tryptophan synthase beta-subunit (paralog of TrpB)                                  | MSM1242                                                                         |
| 1 | COG1355 | Predicted dioxygenase                                                                                     | MSM1438                                                                         |
| 1 | COG1365 | Predicted ATPase (PP-loop superfamily)                                                                    | MSM0190                                                                         |
| 9 | COG1373 | Predicted ATPase (AAA+ superfamily)                                                                       | MSM0061, MSM0280, MSM0680, MSM1197, MSM1278, MSM1527, MSM1789, MSM1790, MSM1795 |
| 1 | COG1402 | Uncharacterized protein, putative amidase                                                                 | MSM0184                                                                         |
| 2 | COG1408 | Predicted phosphohydrolases                                                                               | MSM0964, MSM1165                                                                |
| 1 | COG1409 | Predicted phosphohydrolases                                                                               | MSM0383                                                                         |
| 1 | COG1411 | Uncharacterized protein related to proFAR isomerase (HisA)                                                | MSM1636                                                                         |
| 1 | COG1412 | Uncharacterized proteins of PilT N-term./Vapc superfamily                                                 | MSM0199                                                                         |
| 1 | COG1418 | Predicted HD superfamily hydrolase                                                                        | MSM0632                                                                         |
| 1 | COG1439 | Predicted nucleic acid-binding protein, consists of a PIN domain and a Zn-ribbon module                   | MSM0816                                                                         |
| 4 | COG1453 | Predicted oxidoreductases of the aldo/keto reductase family                                               | MSM0148, MSM0728, MSM1450, MSM1608                                              |
| 1 | COG1489 | DNA-binding protein, stimulates sugar fermentation                                                        | MSM1090                                                                         |
| 1 | COG1537 | Predicted RNA-binding proteins                                                                            | MSM0640                                                                         |
| 1 | COG1545 | Predicted nucleic-acid-binding protein containing a Zn-ribbon                                             | MSM1279                                                                         |
| 2 | COG1571 | Predicted DNA-binding protein containing a Zn-ribbon domain                                               | MSM0452, MSM1295                                                                |
| 1 | COG1606 | ATP-utilizing enzymes of the PP-loop superfamily                                                          | MSM0482                                                                         |
| 1 | COG1608 | Predicted archaeal kinase                                                                                 | MSM1440                                                                         |
| 1 | COG1611 | Predicted Rossmann fold nucleotide-binding protein                                                        | MSM0004                                                                         |
| 1 | COG1634 | Uncharacterized Rossmann fold enzyme                                                                      | MSM0672                                                                         |
| 1 | COG1646 | Predicted phosphate-binding enzymes, TIM-barrel fold                                                      | MSM0124                                                                         |
| 2 | COG1672 | Predicted ATPase (AAA+ superfamily)                                                                       | MSM1196, MSM1646                                                                |
| 1 | COG1691 | NCAIR mutase (PurE)-related proteins                                                                      | MSM1105                                                                         |
| 1 | COG1707 | ACT domain-containing protein                                                                             | MSM1060                                                                         |
| 1 | COG1759 | ATP-utilizing enzymes of ATP-grasp superfamily (probably carboliqases)                                    | MSM0506                                                                         |
| 1 | COG1779 | C4-type Zn-finger protein                                                                                 | MSM0409                                                                         |
| 1 | COG1782 | Predicted metal-dependent RNase, consists of a metallo-beta-lactamase domain and an RNA-binding KH domain | MSM1038                                                                         |
| 1 | COG1821 | Predicted ATP-utilizing enzyme (ATP-grasp superfamily)                                                    | MSM0852                                                                         |
| 1 | COG1829 | Predicted archaeal kinase (sugar kinase superfamily)                                                      | MSM0060                                                                         |
| 1 | COG1855 | ATPase (PilT family)                                                                                      | MSM1183                                                                         |
| 1 | COG1878 | Predicted metal-dependent hydrolase                                                                       | MSM0827                                                                         |
| 1 | COG1907 | Predicted archaeal sugar kinases                                                                          | MSM0848                                                                         |
| 1 | COG1942 | Uncharacterized protein, 4-oxalocrotonate tautomerase homolog                                             | MSM0688                                                                         |
| 1 | COG1964 | Predicted Fe-S oxidoreductases                                                                            | MSM0849                                                                         |
| 1 | COG1988 | Predicted membrane-bound metal-dependent hydrolases                                                       | MSM1079                                                                         |
| 1 | COG1994 | Zn-dependent proteases                                                                                    | MSM0479                                                                         |
| 2 | COG2005 | N-terminal domain of molybdenum-binding protein                                                           | MSM0131, MSM1207                                                                |
| 1 | COG2047 | Uncharacterized protein (ATP-grasp superfamily)                                                           | MSM1131                                                                         |
| 1 | COG2054 | Uncharacterized archaeal kinase related to aspartokinases, uridylylate kinases                            | MSM0604                                                                         |
| 1 | COG2068 | Uncharacterized MobA-related protein                                                                      | MSM0116                                                                         |
| 1 | COG2079 | Uncharacterized protein involved in propionate catabolism                                                 | MSM0449                                                                         |
| 1 | COG2081 | Predicted flavoproteins                                                                                   | MSM1235                                                                         |
| 1 | COG2085 | Predicted dinucleotide-binding enzymes                                                                    | MSM0049                                                                         |
| 1 | COG2102 | Predicted ATPases of PP-loop superfamily                                                                  | MSM0142                                                                         |
| 1 | COG2118 | DNA-binding protein                                                                                       | MSM0708                                                                         |
| 1 | COG2129 | Predicted phosphoesterases, related to the lcc protein                                                    | MSM0792                                                                         |
| 1 | COG2150 | Predicted regulator of amino acid metabolism, contains ACT domain                                         | MSM0635                                                                         |
| 1 | COG2151 | Predicted metal-sulfur cluster biosynthetic enzyme                                                        | MSM0634                                                                         |
| 1 | COG2220 | Predicted Zn-dependent hydrolases of the beta-lactamase fold                                              | MSM0779                                                                         |
| 1 | COG2232 | Predicted ATP-dependent carboliqase related to biotin carboxylase                                         | MSM0431                                                                         |
| 3 | COG2244 | Membrane protein involved in the export of O-antigen and teichoic acid                                    | MSM1208, MSM1559, MSM1560                                                       |
| 1 | COG2252 | Permeases                                                                                                 | MSM1736                                                                         |
| 1 | COG2403 | Predicted GTPase                                                                                          | MSM0091                                                                         |
| 1 | COG2405 | Predicted nucleic acid-binding protein, contains PIN domain                                               | MSM1530                                                                         |
| 1 | COG2517 | Predicted RNA-binding protein containing a C-terminal EMAP domain                                         | MSM0466                                                                         |
| 2 | COG2520 | Predicted methyltransferase                                                                               | MSM0802, MSM1036                                                                |
| 1 | COG2522 | Predicted transcriptional regulator                                                                       | MSM0269                                                                         |
| 3 | COG3291 | FOG: PKD repeat                                                                                           | MSM0281, MSM1716, MSM1735                                                       |

|                             |         |                                                                                                  |                           |
|-----------------------------|---------|--------------------------------------------------------------------------------------------------|---------------------------|
| 1                           | COG3442 | Predicted glutamine amidotransferase                                                             | MSM1138                   |
| 1                           | COG3552 | Protein containing von Willebrand factor type A (vWA) domain                                     | MSM0554                   |
| 1                           | COG3608 | Predicted deacylase                                                                              | MSM1080                   |
| 1                           | COG3894 | Uncharacterized metal-binding protein                                                            | MSM0517                   |
| 1                           | COG3942 | Surface antigen                                                                                  | MSM0921                   |
| 1                           | COG3943 | Virulence protein                                                                                | MSM1645                   |
| 1                           | COG4002 | Predicted phosphotransacetylase                                                                  | MSM0095                   |
| 1                           | COG4015 | Predicted dinucleotide-utilizing enzyme of the ThiF/HesA family                                  | MSM0577                   |
| 1                           | COG4026 | Uncharacterized protein containing TOPRIM domain, potential nuclease                             | MSM1703                   |
| 2                           | COG4032 | Predicted thiamine-pyrophosphate-binding protein                                                 | MSM0080, MSM0081          |
| 1                           | COG4052 | Uncharacterized protein related to methyl coenzyme M reductase subunit C                         | MSM1021                   |
| 1                           | COG4076 | Predicted RNA methylase                                                                          | MSM0363                   |
| 1                           | COG4085 | Predicted RNA-binding protein, contains TRAM domain                                              | MSM0647                   |
| 1                           | COG4087 | Soluble P-type ATPase                                                                            | MSM1252                   |
| 1                           | COG4277 | Predicted DNA-binding protein with the Helix-hairpin-helix motif                                 | MSM1239                   |
| 2                           | COG4747 | ACT domain-containing protein                                                                    | MSM0388, MSM1713          |
| 1                           | COG4801 | Predicted acyltransferase                                                                        | MSM1385                   |
| 1                           | COG4827 | Predicted transporter                                                                            | MSM1717                   |
| 1                           | COG5012 | Predicted cobalamin binding protein                                                              | MSM0516                   |
| 3                           | COG5271 | AAA ATPase containing von Willebrand factor type A (vWA) domain                                  | MSM0993, MSM1240, MSM1454 |
| 1                           | COG5362 | Phage-related terminase                                                                          | MSM1671                   |
| 1                           | COG5518 | Bacteriophage capsid portal protein                                                              | MSM1672                   |
| 2                           | COG5643 | Protein containing a metal-binding domain shared with formylmethanofuran dehydrogenase subunit E | MSM1489, MSM1491          |
| <b>Function Unknown (S)</b> |         |                                                                                                  |                           |
| 1                           | COG0011 | Uncharacterized conserved protein                                                                | MSM1029                   |
| 2                           | COG0028 |                                                                                                  | MSM0686, MSM1225          |
| 1                           | COG0059 |                                                                                                  | MSM1222                   |
| 1                           | COG0111 |                                                                                                  | MSM0457                   |
| 1                           | COG0147 |                                                                                                  | MSM1146                   |
| 1                           | COG0248 |                                                                                                  | MSM1423                   |
| 2                           | COG0318 |                                                                                                  | MSM0025, MSM0374          |
| 1                           | COG0327 | Uncharacterized conserved protein                                                                | MSM0576                   |
| 1                           | COG0378 |                                                                                                  | MSM0107                   |
| 1                           | COG0391 | Uncharacterized conserved protein                                                                | MSM0974                   |
| 1                           | COG0392 | Predicted integral membrane protein                                                              | MSM1094                   |
| 2                           | COG0393 | Uncharacterized conserved protein                                                                | MSM0418, MSM0456          |
| 1                           | COG0432 | Uncharacterized conserved protein                                                                | MSM0279                   |
| 1                           | COG0444 |                                                                                                  | MSM0303                   |
| 1                           | COG0451 |                                                                                                  | MSM0327                   |
| 2                           | COG0458 |                                                                                                  | MSM0361, MSM0488          |
| 1                           | COG0462 |                                                                                                  | MSM1577                   |
| 2                           | COG0473 |                                                                                                  | MSM0373, MSM1298          |
| 2                           | COG0477 |                                                                                                  | MSM0772, MSM1210          |
| 2                           | COG0500 |                                                                                                  | MSM0028, MSM1510          |
| 1                           | COG0505 |                                                                                                  | MSM0489                   |
| 1                           | COG0512 |                                                                                                  | MSM1145                   |
| 1                           | COG0513 |                                                                                                  | MSM1498                   |
| 1                           | COG0543 |                                                                                                  | MSM1043                   |
| 1                           | COG0585 | Uncharacterized conserved protein                                                                | MSM1156                   |
| 1                           | COG0591 |                                                                                                  | MSM0386                   |
| 1                           | COG0599 | Uncharacterized homolog of gamma-carboxymuconolactone decarboxylase subunit                      | MSM0296                   |
| 1                           | COG0601 |                                                                                                  | MSM0301                   |
| 2                           | COG0615 |                                                                                                  | MSM0859, MSM1514          |
| 1                           | COG1028 |                                                                                                  | MSM1731                   |
| 2                           | COG1061 |                                                                                                  | MSM0690, MSM0695          |
| 1                           | COG1063 |                                                                                                  | MSM0376                   |
| 1                           | COG1086 |                                                                                                  | MSM1535                   |
| 1                           | COG1120 |                                                                                                  | MSM1395                   |
| 1                           | COG1124 |                                                                                                  | MSM0304                   |
| 2                           | COG1134 |                                                                                                  | MSM1326, MSM1592          |
| 1                           | COG1173 |                                                                                                  | MSM0302                   |
| 1                           | COG1199 |                                                                                                  | MSM1352                   |
| 1                           | COG1208 |                                                                                                  | MSM0655                   |
| 1                           | COG1243 |                                                                                                  | MSM0842                   |
| 1                           | COG1255 | Uncharacterized protein conserved in archaea                                                     | MSM0894                   |
| 2                           | COG1300 | Uncharacterized membrane protein                                                                 | MSM0215, MSM1526          |
| 1                           | COG1303 | Uncharacterized protein conserved in archaea                                                     | MSM0932                   |
| 1                           | COG1339 |                                                                                                  | MSM1257                   |
| 1                           | COG1359 | Uncharacterized conserved protein                                                                | MSM1378                   |
| 1                           | COG1371 | Uncharacterized conserved protein                                                                | MSM0668                   |
| 1                           | COG1379 | Uncharacterized conserved protein                                                                | MSM1129                   |
| 1                           | COG1387 |                                                                                                  | MSM0063                   |
| 1                           | COG1415 | Uncharacterized conserved protein                                                                | MSM0931                   |

|   |         |                                                                               |                                    |
|---|---------|-------------------------------------------------------------------------------|------------------------------------|
| 1 | COG1422 | Predicted membrane protein                                                    | MSM0736                            |
| 1 | COG1430 | Uncharacterized conserved protein                                             | MSM1339                            |
| 1 | COG1460 | Uncharacterized protein conserved in archaea                                  | MSM1376                            |
| 1 | COG1469 | Uncharacterized conserved protein                                             | MSM1033                            |
| 2 | COG1474 |                                                                               | MSM0671, MSM1264                   |
| 1 | COG1478 | Uncharacterized conserved protein                                             | MSM0975                            |
| 1 | COG1511 | Predicted membrane protein                                                    | MSM0093                            |
| 2 | COG1520 | FOG: WD40-like repeat                                                         | MSM1247, MSM1567                   |
| 1 | COG1548 |                                                                               | MSM0851                            |
| 1 | COG1578 | Uncharacterized conserved protein                                             | MSM0551                            |
| 1 | COG1602 | Uncharacterized conserved protein                                             | MSM0346                            |
| 2 | COG1617 | Uncharacterized conserved protein                                             | MSM0348, MSM0349                   |
| 1 | COG1627 | Uncharacterized protein conserved in archaea                                  | MSM0983                            |
| 1 | COG1630 | Uncharacterized protein conserved in archaea                                  | MSM0123                            |
| 1 | COG1641 | Uncharacterized conserved protein                                             | MSM0935                            |
| 1 | COG1665 | Uncharacterized protein conserved in archaea                                  | MSM1058                            |
| 1 | COG1679 | Uncharacterized conserved protein                                             | MSM1192                            |
| 1 | COG1685 |                                                                               | MSM0835                            |
| 1 | COG1690 | Uncharacterized conserved protein                                             | MSM0666                            |
| 1 | COG1693 | Uncharacterized protein conserved in archaea                                  | MSM1417                            |
| 1 | COG1698 | Uncharacterized protein conserved in archaea                                  | MSM1268                            |
| 1 | COG1701 | Uncharacterized protein conserved in archaea                                  | MSM0140                            |
| 2 | COG1704 | Uncharacterized conserved protein                                             | MSM0660, MSM1422                   |
| 1 | COG1710 | Uncharacterized protein conserved in archaea                                  | MSM0069                            |
| 1 | COG1711 | Uncharacterized protein conserved in archaea                                  | MSM1136                            |
| 1 | COG1714 | Predicted membrane protein/domain                                             | MSM1493                            |
| 1 | COG1718 |                                                                               | MSM0952                            |
| 1 | COG1720 | Uncharacterized conserved protein                                             | MSM0132                            |
| 2 | COG1738 | Uncharacterized conserved protein                                             | MSM0646, MSM1382                   |
| 1 | COG1739 | Uncharacterized conserved protein                                             | MSM0186                            |
| 1 | COG1751 | Uncharacterized conserved protein                                             | MSM0628                            |
| 1 | COG1771 | Uncharacterized protein conserved in archaea                                  | MSM0070                            |
| 1 | COG1784 | Predicted membrane protein                                                    | MSM0599                            |
| 1 | COG1786 | Uncharacterized conserved protein                                             | MSM1155                            |
| 1 | COG1795 | Uncharacterized conserved protein                                             | MSM1213                            |
| 1 | COG1809 | Uncharacterized conserved protein                                             | MSM0086                            |
| 1 | COG1817 | Uncharacterized protein conserved in archaea                                  | MSM0106                            |
| 2 | COG1822 | Predicted archaeal membrane protein                                           | MSM0581, MSM1216                   |
| 1 | COG1836 | Predicted membrane protein                                                    | MSM0659                            |
| 1 | COG1844 | Uncharacterized protein conserved in archaea                                  | MSM0356                            |
| 1 | COG1849 | Uncharacterized protein conserved in archaea                                  | MSM0614                            |
| 2 | COG1852 | Uncharacterized conserved protein                                             | MSM0225, MSM0649                   |
| 1 | COG1860 | Uncharacterized protein conserved in archaea                                  | MSM0285                            |
| 1 | COG1865 | Uncharacterized conserved protein                                             | MSM0825                            |
| 1 | COG1872 | Uncharacterized conserved protein                                             | MSM1603                            |
| 4 | COG1873 | Uncharacterized conserved protein                                             | MSM0465, MSM0822, MSM0841, MSM1004 |
| 1 | COG1891 | Uncharacterized protein conserved in archaea                                  | MSM1628                            |
| 1 | COG1909 | Uncharacterized protein conserved in archaea                                  | MSM0195                            |
| 1 | COG1915 | Uncharacterized conserved protein                                             | MSM0875                            |
| 1 | COG1916 | Uncharacterized homolog of PrgY (pheromone shutdown protein)                  | MSM1024                            |
| 1 | COG1917 | Uncharacterized conserved protein, contains double-stranded beta-helix domain | MSM1447                            |
| 1 | COG1920 | Uncharacterized conserved protein                                             | MSM0288                            |
| 1 | COG1937 | Uncharacterized protein conserved in bacteria                                 | MSM0959                            |
| 1 | COG1944 | Uncharacterized conserved protein                                             | MSM0480                            |
| 1 | COG1945 | Uncharacterized conserved protein                                             | MSM0878                            |
| 1 | COG1950 | Predicted membrane protein                                                    | MSM1166                            |
| 1 | COG1971 | Predicted membrane protein                                                    | MSM0030                            |
| 1 | COG1990 | Uncharacterized conserved protein                                             | MSM0605                            |
| 1 | COG1991 | Uncharacterized conserved protein                                             | MSM0145                            |
| 1 | COG2029 | Uncharacterized conserved protein                                             | MSM1057                            |
| 1 | COG2035 | Predicted membrane protein                                                    | MSM1582                            |
| 1 | COG2042 | Uncharacterized conserved protein                                             | MSM0126                            |
| 1 | COG2043 | Uncharacterized protein conserved in archaea                                  | MSM0115                            |
| 1 | COG2078 | Uncharacterized conserved protein                                             | MSM0867                            |
| 1 | COG2090 | Uncharacterized protein conserved in archaea                                  | MSM1591                            |
| 1 | COG2098 | Uncharacterized protein conserved in archaea                                  | MSM0985                            |
| 1 | COG2106 | Uncharacterized conserved protein                                             | MSM0763                            |
| 1 | COG2122 | Uncharacterized conserved protein                                             | MSM0088                            |
| 1 | COG2136 |                                                                               | MSM1632                            |
| 2 | COG2138 | Uncharacterized conserved protein                                             | MSM1280, MSM1281                   |
| 1 | COG2246 | Predicted membrane protein                                                    | MSM1289                            |
| 2 | COG2314 | Predicted membrane protein                                                    | MSM0109, MSM1739                   |
| 2 | COG2364 | Predicted membrane protein                                                    | MSM0673, MSM0676                   |
| 1 | COG2429 | Uncharacterized conserved protein                                             | MSM0973                            |

|   |         |                                                |                                    |
|---|---------|------------------------------------------------|------------------------------------|
| 1 | COG2450 | Uncharacterized conserved protein              | MSM0406                            |
| 1 | COG2456 | Uncharacterized conserved protein              | MSM1624                            |
| 1 | COG2457 | Uncharacterized conserved protein              | MSM0873                            |
| 1 | COG2892 | Uncharacterized protein conserved in archaea   | MSM1633                            |
| 1 | COG3273 | Uncharacterized conserved protein              | MSM1274                            |
| 2 | COG3274 | Uncharacterized protein conserved in bacteria  | MSM1370, MSM1556                   |
| 1 | COG3356 | Predicted membrane protein                     | MSM0776                            |
| 1 | COG3367 | Uncharacterized conserved protein              | MSM0407                            |
| 1 | COG3482 | Uncharacterized conserved protein              | MSM0481                            |
| 1 | COG3543 | Uncharacterized conserved protein              | MSM0430                            |
| 3 | COG3548 | Predicted integral membrane protein            | MSM0468, MSM0469, MSM1205          |
| 1 | COG3586 | Uncharacterized conserved protein              | MSM1741                            |
| 1 | COG3815 | Predicted membrane protein                     | MSM1770                            |
| 1 | COG3874 | Uncharacterized conserved protein              | MSM0683                            |
| 1 | COG3976 | Uncharacterized protein conserved in bacteria  | MSM1637                            |
| 1 | COG4009 | Uncharacterized protein conserved in archaea   | MSM0794                            |
| 1 | COG4010 | Uncharacterized protein conserved in archaea   | MSM0793                            |
| 1 | COG4012 | Uncharacterized protein conserved in archaea   | MSM1243                            |
| 1 | COG4014 | Uncharacterized protein conserved in archaea   | MSM0840                            |
| 1 | COG4016 | Uncharacterized protein conserved in archaea   | MSM0578                            |
| 1 | COG4017 | Uncharacterized protein conserved in archaea   | MSM0575                            |
| 1 | COG4018 | Uncharacterized protein conserved in archaea   | MSM0571                            |
| 1 | COG4019 | Uncharacterized protein conserved in archaea   | MSM0574                            |
| 1 | COG4020 | Uncharacterized protein conserved in archaea   | MSM1221                            |
| 1 | COG4021 | Uncharacterized conserved protein              | MSM0463                            |
| 1 | COG4022 | Uncharacterized protein conserved in archaea   | MSM0643                            |
| 1 | COG4029 | Uncharacterized protein conserved in archaea   | MSM0812                            |
| 1 | COG4030 | Uncharacterized protein conserved in archaea   | MSM0309                            |
| 1 | COG4033 | Uncharacterized protein conserved in archaea   | MSM0103                            |
| 1 | COG4035 | Predicted membrane protein                     | MSM0315                            |
| 1 | COG4036 | Predicted membrane protein                     | MSM0320                            |
| 1 | COG4037 | Predicted membrane protein                     | MSM0321                            |
| 1 | COG4038 | Predicted membrane protein                     | MSM0322                            |
| 1 | COG4039 | Predicted membrane protein                     | MSM0323                            |
| 1 | COG4040 | Predicted membrane protein                     | MSM0324                            |
| 1 | COG4041 | Predicted membrane protein                     | MSM0325                            |
| 1 | COG4042 | Predicted membrane protein                     | MSM0326                            |
| 2 | COG4050 | Uncharacterized protein conserved in archaea   | MSM0811, MSM1130                   |
| 1 | COG4051 | Uncharacterized protein conserved in archaea   | MSM0809                            |
| 1 | COG4053 | Uncharacterized protein conserved in archaea   | MSM0229                            |
| 1 | COG4065 | Uncharacterized protein conserved in archaea   | MSM1006                            |
| 2 | COG4066 | Uncharacterized protein conserved in archaea   | MSM0064, MSM0367                   |
| 1 | COG4068 | Uncharacterized protein containing a Zn-ribbon | MSM0417                            |
| 1 | COG4069 | Uncharacterized protein conserved in archaea   | MSM0815                            |
| 1 | COG4071 | Uncharacterized protein conserved in archaea   | MSM0630                            |
| 1 | COG4073 | Uncharacterized protein conserved in archaea   | MSM0726                            |
| 1 | COG4077 | Uncharacterized protein conserved in archaea   | MSM1034                            |
| 1 | COG4078 | Predicted membrane protein                     | MSM0319                            |
| 1 | COG4079 | Uncharacterized protein conserved in archaea   | MSM1472                            |
| 1 | COG4081 | Uncharacterized protein conserved in archaea   | MSM0104                            |
| 1 | COG4084 | Uncharacterized protein conserved in archaea   | MSM0314                            |
| 1 | COG4121 | Uncharacterized conserved protein              | MSM1555                            |
| 1 | COG4289 | Uncharacterized protein conserved in bacteria  | MSM1302                            |
| 1 | COG4635 |                                                | MSM1262                            |
| 3 | COG4713 | Predicted membrane protein                     | MSM0521, MSM1291, MSM1444          |
| 2 | COG4744 | Uncharacterized conserved protein              | MSM1402, MSM1719                   |
| 1 | COG4883 | Uncharacterized protein conserved in archaea   | MSM1086                            |
| 1 | COG4907 | Predicted membrane protein                     | MSM1421                            |
| 1 | COG5015 | Uncharacterized conserved protein              | MSM0863                            |
| 1 | COG5305 | Predicted membrane protein                     | MSM1288                            |
| 1 | COG5423 | Predicted metal-binding protein                | MSM0050                            |
| 1 | COG5440 | Uncharacterized conserved protein              | MSM1265                            |
| 4 | COG5464 | Uncharacterized conserved protein              | MSM0067, MSM0681, MSM1765, MSM1785 |
