# Supplementary material
Source: PubMed Central journal article supplement (PMC1965566)
Supplement: pnas_0704189104_22.pdf [file pnas_0704189104_22.pdf]

Table 10. Glycosyltransferases (GT) in *M. smithii* and *M. stadtmanae* proteomes classified according to Carbohydrate Active enZyme (CAZy) database

|                      | CAZy GT family | Protein                                                                                  | Annotation                                                                                                                                                                      |
|----------------------|----------------|------------------------------------------------------------------------------------------|---------------------------------------------------------------------------------------------------------------------------------------------------------------------------------|
| <i>M. smithii</i>    | GT1            | MSM0423*                                                                                 | glycosyltransferase (modular protein with two domains distantly related to glycosyltransferases), GT2/GT1 families [CAZy]                                                       |
|                      | GT2            | MSM0423*                                                                                 | glycosyltransferase (modular protein with two domains distantly related to glycosyltransferases), GT2/GT1 families [CAZy]                                                       |
|                      |                | MSM1290                                                                                  | glycosyltransferase (related to beta-glycosyltransferases), GT2 family [CAZy]                                                                                                   |
|                      |                | MSM1294                                                                                  | glycosyltransferase (related to beta-glycosyltransferases), GT2 family [CAZy]                                                                                                   |
|                      |                | MSM1297                                                                                  | glycosyltransferase (related to beta-glycosyltransferases), GT2 family [CAZy]                                                                                                   |
|                      |                | MSM1310                                                                                  | glycosyltransferase (related to beta-glycosyltransferases), GT2 family [CAZy]                                                                                                   |
|                      |                | MSM1311                                                                                  | glycosyltransferase (related to beta-glycosyltransferases), GT2 family [CAZy]                                                                                                   |
|                      |                | MSM1312                                                                                  | glycosyltransferase (related to beta-glycosyltransferases), GT2 family [CAZy]                                                                                                   |
|                      |                | MSM1316                                                                                  | glycosyltransferase (related to beta-glycosyltransferases), GT2 family [CAZy]                                                                                                   |
|                      |                | MSM1321                                                                                  | glycosyltransferase (related to beta-glycosyltransferases), GT2 family [CAZy]                                                                                                   |
|                      |                | MSM1323                                                                                  | glycosyltransferase (related to beta-glycosyltransferases), GT2 family [CAZy]                                                                                                   |
|                      |                | MSM1324                                                                                  | glycosyltransferase (related to beta-glycosyltransferases), GT2 family [CAZy]                                                                                                   |
|                      |                | MSM1328                                                                                  | glycosyltransferase (related to beta-glycosyltransferases), GT2 family [CAZy]                                                                                                   |
|                      |                | MSM1329                                                                                  | glycosyltransferase (related to beta-glycosyltransferases), GT2 family [CAZy]                                                                                                   |
|                      |                | MSM1330                                                                                  | glycosyltransferase (related to beta-glycosyltransferases), GT2 family [CAZy]                                                                                                   |
|                      |                | MSM1503                                                                                  | glycosyltransferase (related to beta-glycosyltransferases), GT2 family [CAZy]                                                                                                   |
|                      |                | MSM1507                                                                                  | glycosyltransferase (related to beta-glycosyltransferases), GT2 family [CAZy]                                                                                                   |
|                      |                | MSM1545                                                                                  | glycosyltransferase (related to beta-glycosyltransferases), GT2 family [CAZy]                                                                                                   |
|                      |                | MSM1594                                                                                  | glycosyltransferase (modular protein with two N-terminal beta-glycosyltransferase-related domains and C-terminal glycerophosphotransferase-related domain), GT2 families [CAZy] |
|                      |                | MSM1602                                                                                  | glycosyltransferase (modular protein with N-terminal beta-glycosyltransferase-related domain and C-terminal glycerophosphotransferase-related domain), GT2 family [CAZy]        |
|                      | MSM1623        | glycosyltransferase (related to beta-glycosyltransferases), GT2 family [CAZy]            |                                                                                                                                                                                 |
|                      | MSM1627        | glycosyltransferase (related to bactoprenol beta-glucosyltransferase), GT2 family [CAZy] |                                                                                                                                                                                 |
|                      | GT4            | MSM0836                                                                                  | related to alpha-glycosyltransferases, GT4 family [CAZy]                                                                                                                        |
|                      |                | MSM1313                                                                                  | distantly related to glycosyltransferases, GT4 family [CAZy]                                                                                                                    |
|                      |                | MSM1317                                                                                  | distantly related to glycosyltransferases, GT4 family [CAZy]                                                                                                                    |
|                      |                | MSM1322                                                                                  | distantly related to alpha-glycosyltransferases, GT4 family [CAZy]                                                                                                              |
|                      | GT66           | MSM0716                                                                                  | glycosyltransferase (distantly related to oligosaccharyltransferases), STT3 subunit, GT66 family [CAZy]                                                                         |
| <i>M. stadtmanae</i> | GT1            | Msp_0515                                                                                 | partially conserved hypothetical protein                                                                                                                                        |
|                      |                | Msp_0645                                                                                 | predicted glycosyltransferase                                                                                                                                                   |
|                      | GT2            | Msp_0042**                                                                               | predicted glycosyltransferase                                                                                                                                                   |
|                      |                | Msp_0045                                                                                 | predicted glycosyltransferase                                                                                                                                                   |
|                      |                | Msp_0054                                                                                 | predicted glycosyltransferase                                                                                                                                                   |
|                      |                | Msp_0203                                                                                 | predicted glycosyltransferase                                                                                                                                                   |
|                      |                | Msp_0206                                                                                 | predicted glycosyltransferase                                                                                                                                                   |
|                      |                | Msp_0207                                                                                 | predicted glycosyltransferase                                                                                                                                                   |
|                      |                | Msp_0212                                                                                 | predicted glycosyltransferase                                                                                                                                                   |
|                      |                | Msp_0215                                                                                 | predicted glycosyltransferase                                                                                                                                                   |
|                      |                | Msp_0218                                                                                 | predicted glycosyltransferase                                                                                                                                                   |
|                      |                | Msp_0220                                                                                 | predicted glycosyltransferase                                                                                                                                                   |
|                      |                | Msp_0441                                                                                 | predicted glycosyltransferase                                                                                                                                                   |
|                      |                | Msp_0442                                                                                 | predicted glycosyltransferase                                                                                                                                                   |
|                      |                | Msp_0492                                                                                 | predicted glycosyltransferase                                                                                                                                                   |
|                      |                | Msp_0493                                                                                 | predicted glycosyltransferase                                                                                                                                                   |
|                      |                | Msp_0495                                                                                 | predicted glycosyltransferase                                                                                                                                                   |
|                      |                | Msp_0496                                                                                 | predicted glycosyltransferase                                                                                                                                                   |
|                      |                | Msp_0500                                                                                 | predicted glycosyltransferase                                                                                                                                                   |
|                      |                | Msp_0538                                                                                 | predicted glycosyltransferase                                                                                                                                                   |
|                      |                | Msp_0541                                                                                 | predicted glycosyltransferase                                                                                                                                                   |
|                      |                | Msp_0645                                                                                 | predicted glycosyltransferase                                                                                                                                                   |
|                      |                | Msp_0989                                                                                 | predicted glycosyltransferase                                                                                                                                                   |
|                      |                | Msp_1087                                                                                 | predicted glycosyltransferase                                                                                                                                                   |
|                      |                | Msp_1481                                                                                 | conserved hypothetical membrane-spanning protein                                                                                                                                |
|                      | Msp_1540       | partially conserved hypothetical protein                                                 |                                                                                                                                                                                 |
|                      | GT4            | Msp_0039                                                                                 | predicted glycosyltransferase                                                                                                                                                   |
|                      |                | Msp_0044                                                                                 | predicted glycosyltransferase                                                                                                                                                   |
|                      |                | Msp_0049                                                                                 | predicted glycosyltransferase                                                                                                                                                   |
|                      |                | Msp_0051                                                                                 | predicted glycosyltransferase                                                                                                                                                   |
|                      |                | Msp_0052                                                                                 | predicted glycosyltransferase                                                                                                                                                   |
|                      |                | Msp_0053                                                                                 | predicted glycosyltransferase                                                                                                                                                   |
|                      |                | Msp_0055                                                                                 | predicted glycosyltransferase                                                                                                                                                   |
|                      |                | Msp_0056                                                                                 | predicted glycosyltransferase                                                                                                                                                   |
|                      |                | Msp_0057                                                                                 | predicted glycosyltransferase                                                                                                                                                   |
|                      |                | Msp_0101                                                                                 | predicted glycosyltransferase                                                                                                                                                   |
|                      |                | Msp_0492                                                                                 | predicted glycosyltransferase                                                                                                                                                   |
|                      |                | Msp_0991                                                                                 | predicted glycosyltransferase                                                                                                                                                   |
|                      | GT66           | Msp_0368                                                                                 | conserved hypothetical membrane-spanning protein                                                                                                                                |

\* - modular protein

\*\* - probable fragment
