# Supplementary material
Source: PubMed Central journal article supplement (PMC1965566)
Supplement: pnas_0704189104_23.pdf [file pnas_0704189104_23.pdf]

**Table 14. BLAST analysis of the putative *M. smithii* prophage**

| <b><i>M. smithii</i><br/>Protein</b> | <b>Phage Protein<br/>Sequence ID*</b> | <b>Function</b>             | <b>HMM Annotation</b>                                        | <b>Phage HMM</b> | <b>E value</b> |
|--------------------------------------|---------------------------------------|-----------------------------|--------------------------------------------------------------|------------------|----------------|
| MSM1640                              | 5417                                  | unknown                     | Phage_integrase: Phage integrase family                      | PF00589          | 2.30E-06       |
| MSM1654                              | 5721                                  | Gp40                        | ERF: ERF superfamily                                         | PF04404          | 6.90E-11       |
| MSM1671                              | 5397                                  | large terminase subunit     | psiM2_ORF9: phage uncharacterized protein, C-terminal domain | TIGR01630        | 0.0042         |
| MSM1672                              | 5398                                  | portal protein              | portal_PBSX: phage portal protein, PBSX family               | TIGR01540        | 6.70E-12       |
| MSM1675                              | 6246                                  | putative structural protein |                                                              |                  |                |
| MSM1677                              | 6247                                  | putative structural protein |                                                              |                  |                |
| MSM1684                              | 20206                                 | ORF001                      | TMP: TMP repeat                                              | PF05017          | 0.0036         |
| MSM1691                              | 6262                                  | PeiW                        |                                                              |                  |                |

\* - from the Phage Sequence Databank
