# Supplementary material
Source: PubMed Central journal article supplement (PMC1965566)
Supplement: pnas_0704189104_24.pdf [file pnas_0704189104_24.pdf]

Table 15. Primers used for qRT-PCR assays

| ORF     | ANNOTATION                                                    | PRIMER    | SEQUENCE (5' -> 3')       | AMPLICON SIZE (bp) |
|---------|---------------------------------------------------------------|-----------|---------------------------|--------------------|
| MSM0027 | glutamate synthase, GltB                                      | MSM0027.F | GAAGGCCGTCGGATAGGTA       | 117                |
|         |                                                               | MSM0027.R | CTCCAGTAGCTCCCCCTCTT      |                    |
| MSM0049 | F <sub>420</sub> -dependent NADP reductase, Fno               | MSM0049.F | GGGTTACAGCAGCAGAAAGG      | 118                |
|         |                                                               | MSM0049.F | CATATCAATTGGGTCTGGA       |                    |
| MSM0227 | HMG-CoA reductase, HmgA                                       | MSM0227.F | GGCTGTGAATTACCGCATATGG    | 117                |
|         |                                                               | MSM0227.R | TAACGGTCCGGCTACACCTACA    |                    |
| MSM0228 | succinyl-CoA synthetase, Suc                                  | MSM0228.F | TGCTCGTGAAATGGACACTACAG   | 165                |
|         |                                                               | MSM0228.R | GTAAGCTGGCTGGCTACTTCGT    |                    |
| MSM0234 | ammonium transporter, AmtB                                    | MSM0234.F | TTTCTGGTGGTGTGTGGGA       | 115                |
|         |                                                               | MSM0234.R | TAACCATCCTCCACCCATA       |                    |
| MSM0291 | bicarbonate ABC transporter, permease component, BtcA         | MSM0291.F | TCTGCAGTACCGCCTATAGTTTCC  | 101                |
|         |                                                               | MSM0291.R | CCTAAACCGCTACTTGAACCTATCA |                    |
| MSM0330 | acetyl-CoA synthetase, Acs                                    | MSM0330.F | ATCGAAGAGGAAAGCGATGA      | 103                |
|         |                                                               | MSM0330.R | GGAAGTCCGCCTGTACCTGA      |                    |
| MSM0368 | glutamate synthase (NADPH), alpha subunit, GltA               | MSM0368.F | GGAATGCTTCCTGAAGAACCG     | 127                |
|         |                                                               | MSM0368.R | GCCCCGTGACCTATTTTGT       |                    |
| MSM0411 | adhesin-like protein                                          | MSM0411.F | TCAGAATTGCAGGTGGTTTGG     | 129                |
|         |                                                               | MSM0411.R | CGTGAACATCCATCCCATTAC     |                    |
| MSM0515 | methanol:cobalamin methyltransferase, MtaB                    | MSM0515.F | ATGTGGTGCAAAAGGACCTC      | 112                |
|         |                                                               | MSM0515.R | CAGAGTGCACAAAACAGCA       |                    |
| MSM0516 | corrinoid protein                                             | MSM0516.F | CGTAGAAGCTTACCACACACCA    | 108                |
|         |                                                               | MSM0516.R | CGGTACGAATCCCCTACAA       |                    |
| MSM0518 | methylcobalamin:coenzyme M methyltransferase                  | MSM0518.F | TATTGCATATCTCGGGTCA       | 112                |
|         |                                                               | MSM0518.R | GATGCTTTCCTTGCTTTTG       |                    |
| MSM0560 | pyruvate:ferredoxin oxidoreductase, PorB                      | MSM0560.F | CAATCATTATCCGGAGCAATGG    | 104                |
|         |                                                               | MSM0560.R | GGTGTTCACCACTTCTTTGGA     |                    |
| MSM0572 | methylene-H4MPT dehydrogenase, Hmd                            | MSM0572.F | ACCCAGGTGCTGTACCTGAAAT    | 119                |
|         |                                                               | MSM0572.R | TGTGAATGCAGATCCTCTTGCT    |                    |
| MSM0654 | carbonic anhydrase, Cab                                       | MSM0654.F | TGGTGCTGTGTTCATGGAT       | 112                |
|         |                                                               | MSM0654.R | CAGCTCCAGCCCCATAATA       |                    |
| MSM0848 | ribofuranosylaminobenzene 5'-phosphate synthase, RfaS         | MSM0848.F | CCAGCATTTGGCCATTCAA       | 146                |
|         |                                                               | MSM0848.R | GGTCCAAAAGAGCTCATACTACAC  |                    |
| MSM0888 | glutamate dehydrogenase, GhdA                                 | MSM0888.F | TGCTCTTCCATGTGCAACTC      | 100                |
|         |                                                               | MSM0888.R | TAGGCATGTTTGCACCTCA       |                    |
| MSM0986 | conjugated bile salt acid hydrolase                           | MSM0986.F | TTATAGTCCGGGAATGGTTTC     | 109                |
|         |                                                               | MSM0986.R | TTTCAGAATCTCCGAAACCG      |                    |
| MSM0988 | phosphoenolpyruvate synthase, PpsA                            | MSM0988.F | CAAGCTCATTATGGCGAACCA     | 110                |
|         |                                                               | MSM0988.R | GCTACGCCATTGTCATCACCTA    |                    |
| MSM0991 | bicarbonate ABC transporter, substrate-binding component, Btc | MSM0991.F | TTGCACGTGAAGACGGTTATG     | 111                |
|         |                                                               | MSM0991.R | CCTGACCCTGTTTAACTGCATCAT  |                    |
| MSM0995 | adhesin-like protein                                          | MSM0995.F | GTGATGCATTAGAAGAGGCTCCTT  | 113                |
|         |                                                               | MSM0995.R | ATCTCCGCAGGCATGATAGTT     |                    |
| MSM1014 | MtrE                                                          | MSM1014.F | AACAAAGCGGCTTCTGGTGAA     | 127                |
|         |                                                               | MSM1014.R | CGACACAAGATCCCATTGCAAT    |                    |
| MSM1078 | sodium:bile transporter                                       | MSM1078.F | GCTGTTTCTGGAAGTCCGCTTA    | 105                |
|         |                                                               | MSM1078.R | CCTAGAAGCGGTGTCCAGATAAAGT |                    |
| MSM1112 | adhesin-like protein                                          | MSM1112.F | GCTAAATTCAGTACAGCACAGGA   | 114                |
|         |                                                               | MSM1112.R | ACCCAAATCAGCTACACCGTCTT   |                    |
| MSM1113 | adhesin-like protein                                          | MSM1113.F | TCGCATAGGACTTGGATTAGGA    | 107                |
|         |                                                               | MSM1113.R | CAACAGCCCTTCAATTAACCT     |                    |
| MSM1198 | O-sialoglycoprotein endopeptidase                             | MSM1198.F | GCTGCCGAACATCATGGAT       | 162                |
|         |                                                               | MSM1198.R | TAGTGCCAGTGTCTTGCAGAA     |                    |
| MSM1282 | adhesin-like protein                                          | MSM1282.F | GCGGCATTATCTTTTCAGCTG     | 183                |
|         |                                                               | MSM1282.R | AGCAGGTACATCCCCCTCCAGTA   |                    |
| MSM1305 | adhesin-like protein                                          | MSM1305.F | ACATTAGACGGTCAAGGCAAACC   | 131                |
|         |                                                               | MSM1305.R | TATTCACCGGCCATCAGTCTGATT  |                    |
| MSM1381 | alcohol dehydrogenase, Adh                                    | MSM1381.F | AAGAAGTCCCGGAATGTGG       | 102                |
|         |                                                               | MSM1381.R | TCCGATAGCTCTTCCCATA       |                    |
| MSM1399 | adhesin-like protein                                          | MSM1399.F | CTGCAACTACTTCTGGAGGATCA   | 117                |
|         |                                                               | MSM1399.R | CCATCACTAGAACCAGAGTCACTTG |                    |
| MSM1418 | glutamine synthetase, GlnA                                    | MSM1418.F | GACGGAAAACCATTTGTTGG      | 141                |
|         |                                                               | MSM1418.R | GCATTTGGGTATCCTTCATCG     |                    |
| MSM1534 | adhesin-like protein                                          | MSM1534.F | AATCCACATCTGATGCAGCTGTC   | 239                |
|         |                                                               | MSM1534.R | TCCCATGTCCGGAGTTACAACA    |                    |
| MSM1539 | sialic acid synthase, NeuB                                    | MSM1539.F | TGGCAAAATCTGGTGAGAT       | 116                |
|         |                                                               | MSM1539.R | CCTGACCCTCCCATATTGTTT     |                    |
