# Supplementary material
Source: PubMed Central journal article supplement (PMC1965566)

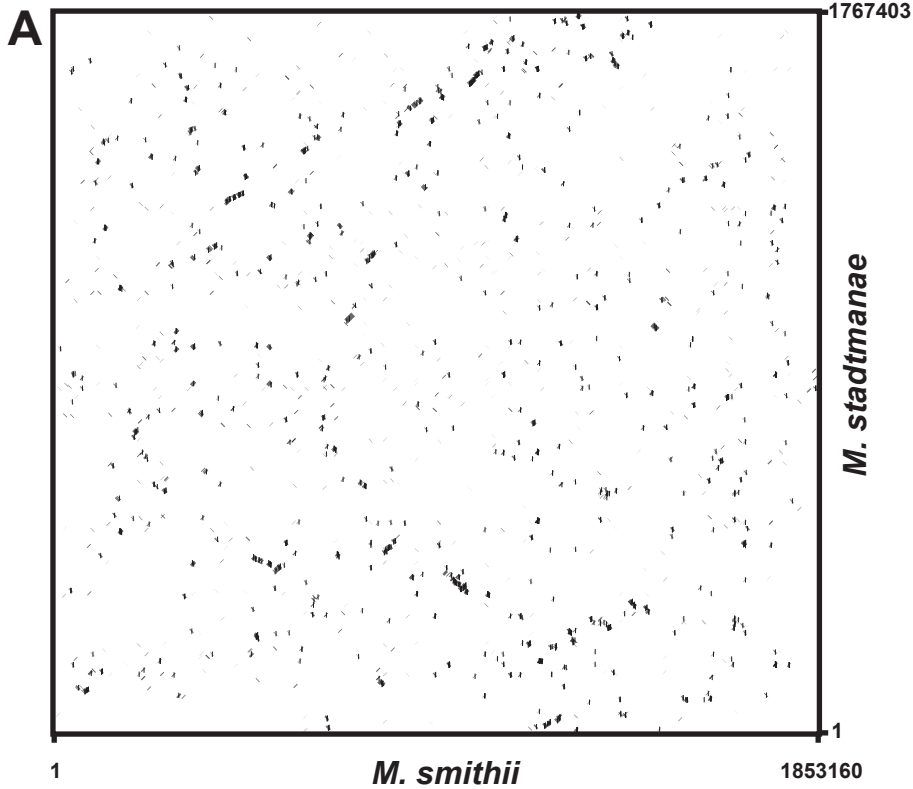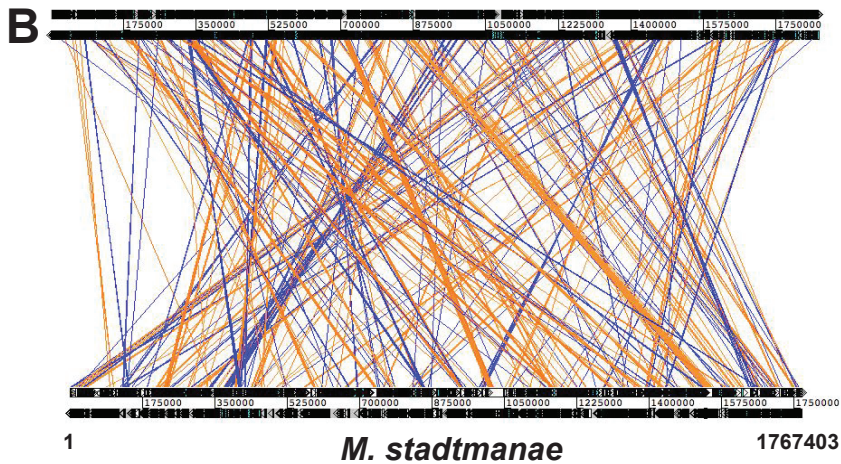

Supplement: pnas_0704189104_1.pdf [file pnas_0704189104_1.pdf]

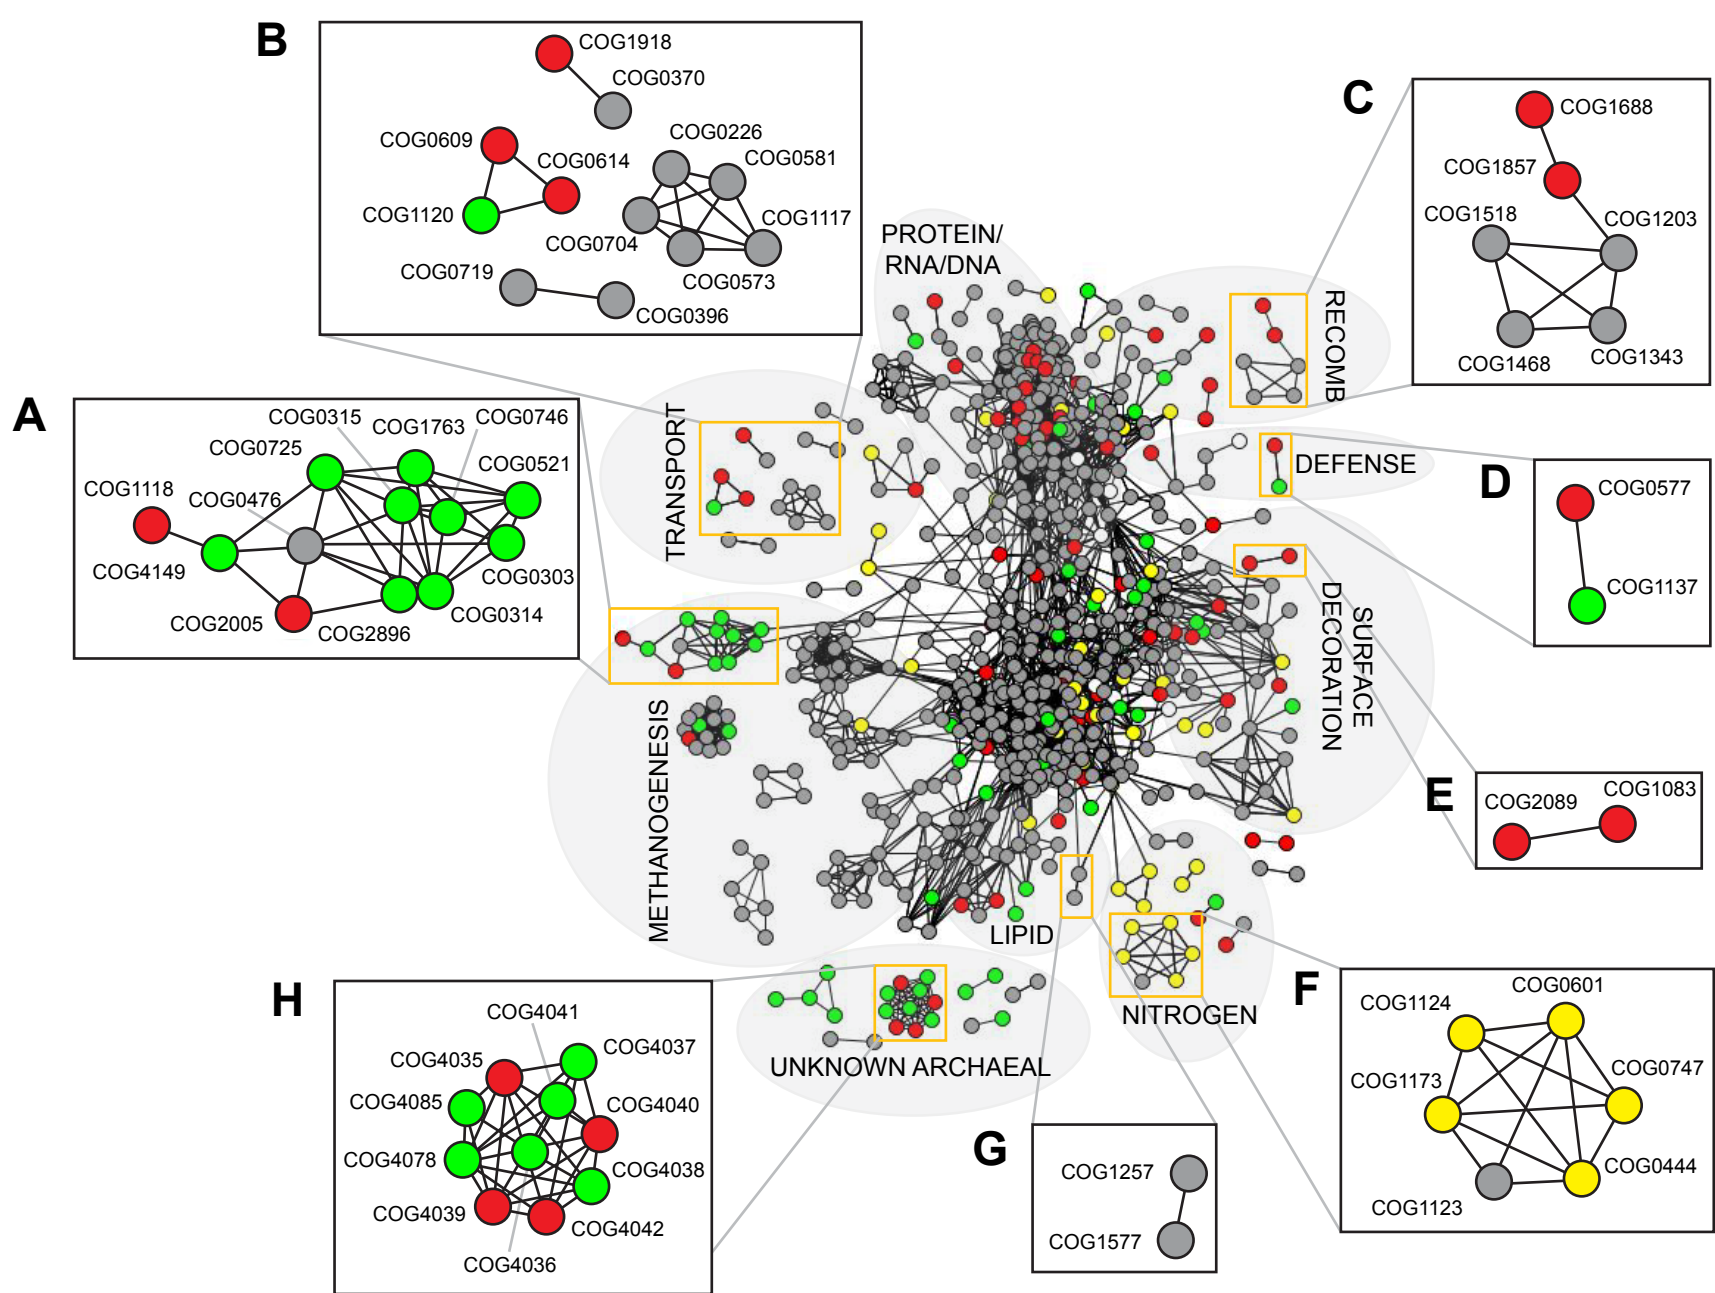

Supplement: pnas_0704189104_2.pdf [file pnas_0704189104_2.pdf]

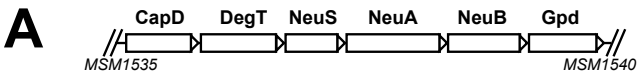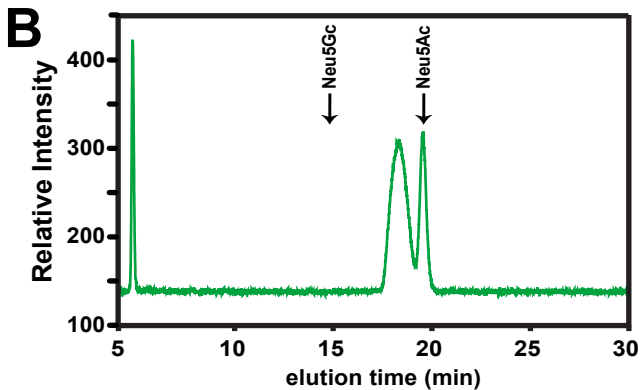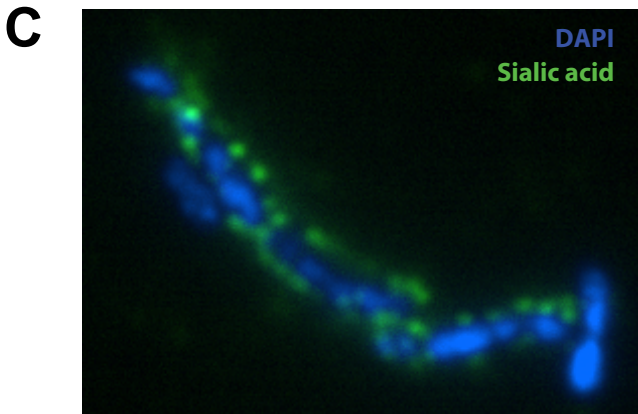

Supplement: pnas_0704189104_3.pdf [file pnas_0704189104_3.pdf]

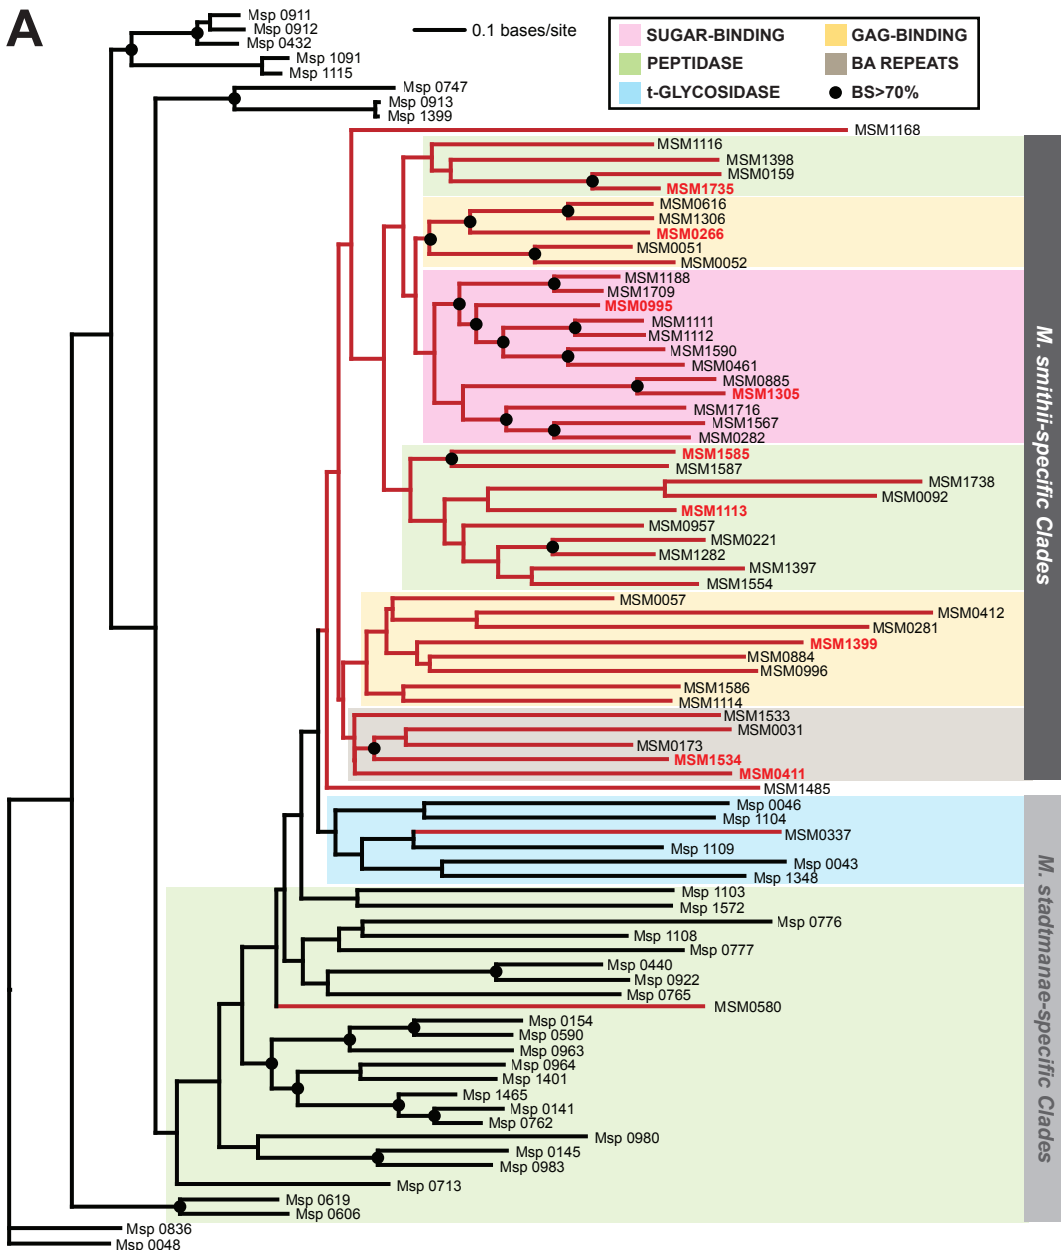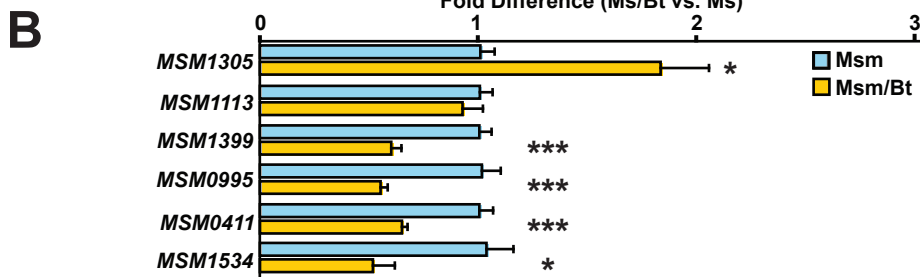

Supplement: pnas_0704189104_4.pdf [file pnas_0704189104_4.pdf]

**A**Guanosine or  
Guanosine Derivative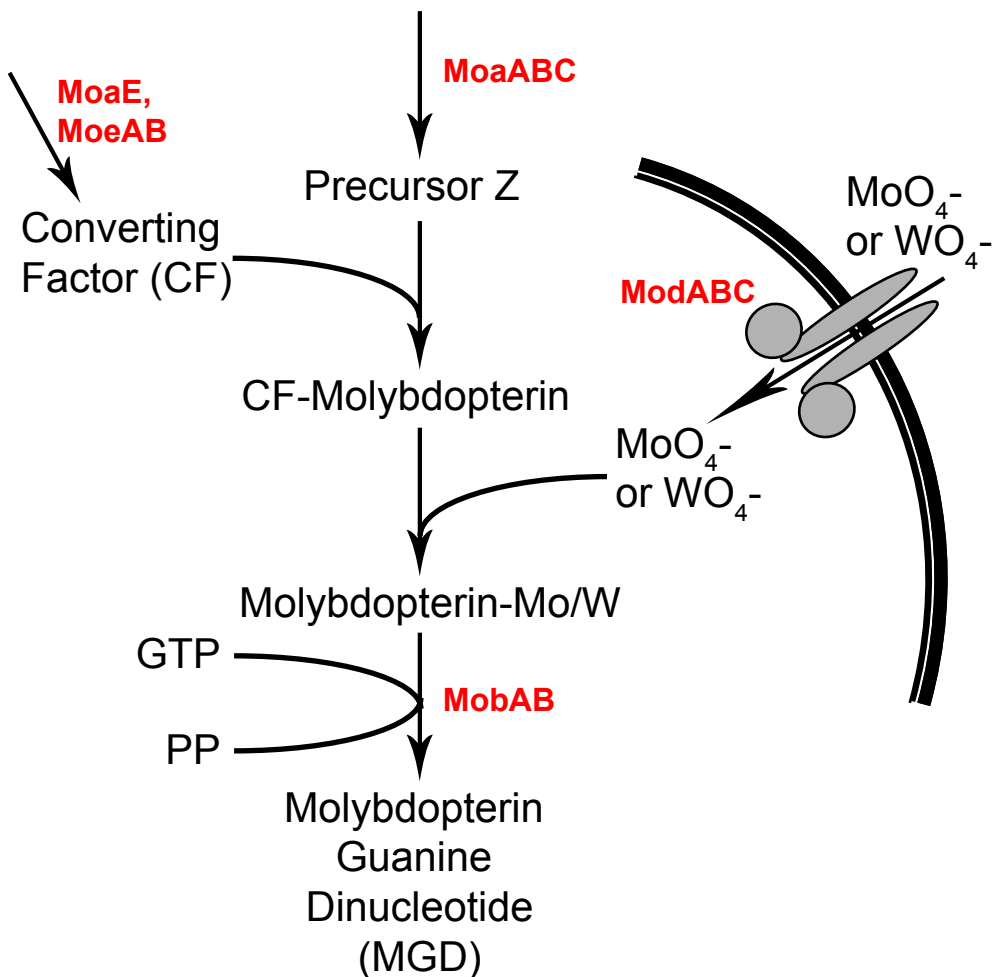**B**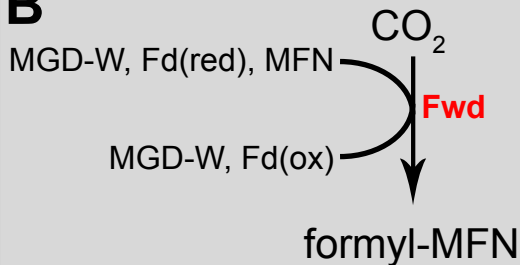

Supplement: pnas_0704189104_5.pdf [file pnas_0704189104_5.pdf]

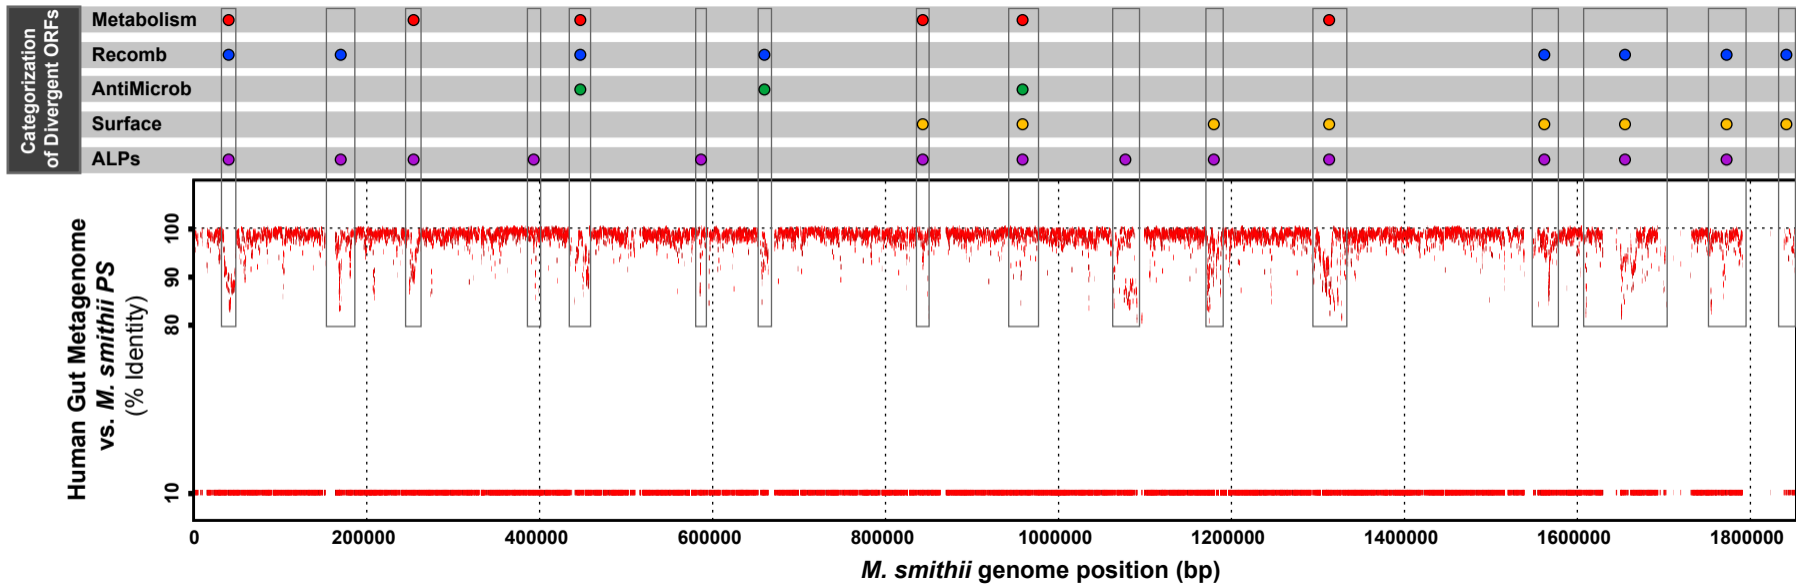

Supplement: pnas_0704189104_6.pdf [file pnas_0704189104_6.pdf]
